# Supplementary material
Source: publisher figshare collection journal article supplement (https://gsajournals.figshare.com/ndownloader/files/14929718)
Supplement: Supplementary file 1 [file 14929718]

## Sheet: SuppFile1_Processed_Data_ALL
Data were processed in edgeR		User_ID sorted by SD	Ensembl_gene_id	symbol	Hypo_P_413	Hypo_P_414	Hypo_P_415	Hypo_P_418	Hypo_P_421	Hypo_P_425	Hypo_P_427	Hypo_P_4493	Hypo_V_405	Hypo_V_409	Hypo_V_4486	Hypo_V_4487	Hypo_V_4488	Hypo_V_4489	Hypo_V_4490	Hypo_V_4491	Amy_P_418	Amy_P_415	Amy_P_414	Amy_P_413	Amy_P_4493	Amy_P_421	Amy_P_425	Amy_P_427	Amy_V_405	Amy_V_409	Amy_V_4486	Amy_V_4489	Amy_V_4488	Amy_V_4490	Amy_V_4491	Hippo_P_413	Hippo_P_414	Hippo_P_415	Hippo_P_418	Hippo_P_421	Hippo_P_425	Hippo_P_427	Hippo_P_4493	Hippo_V_405	Hippo_V_409	Hippo_V_4486	Hippo_V_4487	Hippo_V_4488	Hippo_V_4489
log2(CPM+c) with pseudocount c =4	1	13199	ENSMUSG00000059213	Ddn	9.8924	9.6725	9.4033	9.5351	9.8217	10.1764	9.7068	9.7749	9.2286	9.4091	9.4778	9.5617	9.4398	9.4386	9.4777	9.3695	15.4325	14.9588	15.3023	15.2289	15.1613	15.1347	14.9659	15.2964	14.6392	15.1454	14.7462	15.0012	15.1453	15.0773	15.0891	15.6197	15.4779	15.3718	15.482	15.2875	15.4613	15.2531	15.4478	15.5735	15.7106	15.4626	15.5253	15.4205	15.492
	2	14399	ENSMUSG00000020428	Gabra6	2.2536	2	3.0323	5.3421	2.3956	4.0239	2.7312	3.178	2	2.9157	2.9044	3.5887	2	4.5854	2.9669	3.0319	5.3551	2	2.3953	2.4833	4.0682	3.5274	4.8769	4.4992	3.2942	2.7718	5.4049	3.3524	4.6583	3.625	3.4853	9.9561	5.1399	4.2514	4.7295	2.6171	4.2434	4.8588	3.2117	2.9793	3.141	3.5368	5.1867	3.6599	3.6961
	3	56410	ENSMUSG00000040380	Cbln3	4.5373	4.2987	3.4181	5.8652	4.4374	5.1982	4.1044	6.2394	4.6038	4.0051	4.0692	4.3264	2.7237	5.6206	4.6802	5.1714	6.2313	4.6362	4.5952	3.3739	3.8298	4.863	6.3774	5.3267	4.9817	3.2719	6.6427	5.4517	4.4062	4.9095	4.893	11.0312	5.776	4.958	5.4469	4.2439	5.9254	5.863	5.389	4.7017	4.9315	5.2079	6.2569	4.7048	4.3525
	4	245827	ENSMUSG00000055333	Fat2	3.4488	2.3562	2.8767	6.0694	2.3956	4.4855	3.9892	5.8122	2.7091	2	3.456	3.382	2.4067	4.2899	2.9669	3.6273	5.5361	5.4637	3.3651	3.3739	3.5441	3.3611	5.0816	5.0688	2.7876	2	5.5021	4.8507	5.1026	3.9508	4.1185	9.7421	5.2178	5.0913	4.5011	3.9767	4.6817	4.9097	4.228	3.9689	5.1432	3.9848	4.7991	4.7823	3.7769
	5	15171	ENSMUSG00000045471	Hcrt	12.5491	11.8269	11.9477	11.5465	12.4936	11.2618	12.3968	11.9493	12.0884	11.4334	11.957	11.7387	11.8914	11.7704	11.8589	12.3557	4.2514	3.9294	2.9602	2.4833	3.1874	3.6764	3.318	8.1569	3.9653	2	3.5082	3.3524	3.5964	2.6051	3.4853	3.4739	2	2.5864	2	2.8486	2.4579	2	2.6102	2	2	3.1812	3.6533	3.1375	2.9512
	6	11998	ENSMUSG00000037727	Avp	12.197	12.0956	12.4323	12.3916	13.0036	12.2061	12.991	12.658	12.3003	12.7383	12.4073	11.7735	11.9017	12.2981	11.0109	11.75	4.9063	9.2277	6.6593	8.935	8.3819	8.8831	9.288	9.366	9.6093	10.1484	7.3389	10.0637	8.2361	5.5781	8.7161	6.3298	4.0896	4.2514	4.1686	3.1382	4.6817	5.4465	3.7523	3.8443	3.6366	4.3856	2.3085	3.604	3.9261
	7	18429	ENSMUSG00000027301	Oxt	11.9706	12.4075	12.3803	11.9587	12.9902	11.9816	12.7093	11.7934	12.0833	12.4197	12.1546	12.0918	11.252	12.342	11.7479	11.5237	3.0185	6.6483	4.988	5.5041	5.9119	6.2391	5.7353	7.2146	6.2321	7.0057	3.5082	7.1491	6.2831	5.3013	6.5144	5.6755	2.4067	3.3246	2.2561	2.4858	4.4547	2.3341	4.1446	2.9793	2	4.3261	3.8569	2	2
	8	110312	ENSMUSG00000035383	Pmch	11.1849	11.1779	11.2397	11.4463	10.7291	11.3355	11.0846	11.1291	11.7212	10.9246	11.7091	11.8608	11.6785	11.6538	11.8035	12.2507	3.4382	2	3.8162	3.5799	4.1741	2.957	6.525	6.7984	4.0936	5.677	5.4543	4.4194	4.5377	2.8332	2	3.5849	3.394	2	2	2.3413	2.4579	2	3.367	2.4047	2	2.7083	2	3.604	2
	9	18545	ENSMUSG00000004630	Pcp2	5.381	2.8797	3.8944	4.0168	4.2587	4.4855	2.9928	4.6941	2.7091	2.6153	2.9044	2.8505	2	3.987	2.9669	3.0319	4.839	4.0739	4.6686	3.3739	3.8298	4.1543	4.8769	4.0992	3.6684	3.4064	5.0667	4.7207	4.715	3.8502	2	8.626	4.5164	4.7586	4.3985	4.0248	3.9957	5.3759	3.367	4.5504	3.3258	4.699	3.7587	4.1634	4.2988
	10	15228	ENSMUSG00000020950	Foxg1	6.518	5.0497	7.2321	5.381	7.5171	6.731	6.4457	4.99	5.6837	4.7763	5.4816	6.9597	5.0295	7.2143	5.4832	5.3297	10.5746	10.5258	10.5144	10.6613	10.4006	10.5289	10.3243	10.6482	10.607	10.6103	10.7184	10.6072	10.7552	10.7327	10.5708	11.3156	11.5544	11.5445	11.5676	11.3578	11.5142	11.4712	11.3665	11.4315	11.369	11.5685	11.3066	11.3205	11.2758
	11	16370	ENSMUSG00000054667	Irs4	11.3367	11.3086	11.4736	11.3771	11.3601	11.4273	11.4203	11.5551	11.5679	11.3829	11.4759	11.3872	11.6384	11.6338	11.329	11.3743	7.621	6.716	8.1036	7.7421	7.6854	8.7079	7.7248	7.2973	7.5015	8.3388	7.8533	8.0497	6.7444	8.0643	8.3664	4.1154	2.7236	3.5879	2.979	2.4858	3.7773	3.7421	2	4.3813	2.929	3.0401	2	4.4113	2.4577
	12	54698	ENSMUSG00000032021	Crtam	2	2	2.2739	2	2	2.5956	2.4115	3.9805	2	2.2355	2.368	2.487	2	3.1996	2	2	2	2	2	2	2	2.7027	2	2	2	2	3.8409	2	2.3254	2	2	7.2853	2.4067	2.5864	3.1145	2.1807	3.4227	2.3341	2	2.9793	3.77	2.5085	4.2673	2	2.2469
	13	64011	ENSMUSG00000053310	Nrgn	10.768	10.381	10.1532	10.081	10.6689	10.6129	10.2399	10.2421	10.1558	10.087	10.2757	10.1845	10.3109	10.3517	10.1443	10.221	13.5115	13.3804	13.6259	13.737	13.4832	13.5296	13.4624	13.555	13.9032	13.7222	13.8482	13.4688	13.8557	13.6973	13.5239	13.869	13.9141	13.8426	13.9147	13.8166	13.8798	13.8861	13.8245	14.0087	14.0268	14.103	13.9268	13.6927	14.0467
	14	19051	ENSMUSG00000002930	Ppp1r17	8.0009	7.8329	7.9841	8.5386	7.5945	7.7036	7.9401	8.1167	7.3795	7.4852	7.8496	7.9172	8.0686	7.6087	7.6162	8.1707	5.2553	3.5881	4.518	4.0646	5.1674	5.3362	3.995	4.2727	4.2114	5.2463	5.0667	4.2412	5.5075	3.625	4.7895	8.7856	4.7083	4.8618	3.2385	3.1382	3.4227	5.0525	2.3371	2.4047	3.4895	3.3097	4.2673	3.3561	3.6961
	15	72961	ENSMUSG00000070570	Slc17a7	6.4047	5.3162	5.6193	6.9885	6.3394	8.6535	4.4034	7.6569	6.2629	5.8904	6.2492	6.2226	5.7763	5.3593	8.3031	5.2261	14.4631	14.4991	14.2801	14.5363	14.1376	13.8784	14.3646	14.2949	14.3813	14.083	14.7818	14.5259	14.725	14.575	14.3414	14.451	14.4558	14.539	14.6514	14.4988	14.7025	14.4248	14.5964	14.598	14.412	14.6387	14.3739	14.4888	14.6634
	16	269295	ENSMUSG00000050896	Rtn4rl2	4.1569	2	2.7024	2	2	5.2764	2.9928	2	2	3.2741	2.9044	2.8505	2.9834	2.4547	3.1845	3.4548	9.8462	9.6031	9.527	10.038	9.1449	8.9172	9.5052	9.1129	9.9809	9.204	9.9531	9.9577	9.8766	9.9916	9.5461	9.3951	9.575	9.3398	9.7496	9.3226	9.8181	9.1835	9.5168	9.5709	9.6646	9.7751	9.2196	9.3822	9.6785
	17	102278	ENSMUSG00000034796	Cpne7	10.639	10.6935	10.1743	10.4907	10.5813	10.7511	10.2257	10.0389	10.1266	10.3162	10.2331	10.1805	10.031	9.9795	10.4237	9.9697	11.732	10.9348	11.5481	10.9862	10.9681	11.8411	10.6399	11.0768	11.3846	11.0826	10.8042	11.3262	10.814	11.6975	11.6689	11.6714	12.1495	12.1449	12.4252	11.7019	12.5328	12.2814	11.6312	12.0988	12.2727	11.9411	11.6951	12.4675	12.1283
	18	22044	ENSMUSG00000005892	Trh	10.3623	10.4793	11.0817	10.7995	11.0687	10.8567	10.6803	10.1446	10.3119	10.2471	10.3469	10.7572	10.3005	10.6894	10.4762	10.339	9.7302	6.2523	9.1614	7.7421	6.8148	8.8323	7.7248	8.6133	7.2494	8.1742	6.6427	7.4955	7.6167	8.1462	8.1589	4.8073	3.0974	3.1724	2.979	3.1382	3.0844	2.6052	3.2117	3.1988	3.4895	2	4.4036	3.7655	2.9512
	19	15898	ENSMUSG00000032174	Icam5	10.2058	9.9093	9.6135	9.5394	9.8096	10.1454	9.7627	9.6878	9.4047	9.5833	9.6896	9.3472	9.4124	9.4043	9.1782	9.3816	12.8509	12.8057	12.9117	12.9269	12.4028	12.5772	12.5915	12.6457	12.8154	12.7577	13.0398	12.7875	12.9412	13.0368	12.8359	12.8308	12.8693	12.7541	13.0176	12.8105	12.9971	12.6506	12.9498	12.9598	13.0379	13.0867	12.6899	12.8084	13.0232
	20	226438	ENSMUSG00000051985	Igfn1	2	2.3562	2.504	2.8726	2	3.016	2.9928	2	2.8848	2.6153	2.9044	2	3.7136	2.4547	2	2	10.4741	10.8114	9.7419	9.9936	10.1511	8.3732	10.4249	10.5484	10.2575	9.6693	10.0824	10.243	9.9119	10.2978	10.0176	4.7607	4.295	4.8618	2.979	4.9144	5.7956	6.7013	4.0561	5.0223	4.3837	4.264	6.183	5.9781	3.5195
	21	12669	ENSMUSG00000032773	Chrm1	8.0436	8.3903	8.2289	8.5557	7.9515	8.4151	8.2337	8.2303	7.8348	8.2613	8.2026	7.9736	8.3304	8.1503	7.9929	7.6863	11.8948	11.7512	11.693	11.6638	11.6893	11.222	11.7888	11.4655	11.7642	11.5904	12.1043	11.7435	11.8809	11.8085	11.6022	11.9351	12.1295	12.057	12.0987	12.1897	12.1876	11.9025	12.2262	12.0804	12.1753	12.2382	12.009	12.0758	12.1884
	22	12971	ENSMUSG00000030905	Crym	6.9172	6.9393	6.8271	5.4188	7.4354	8.2506	7.3435	7.4363	7.1918	7.094	6.3958	6.2833	6.7751	6.4912	6.4385	6.5839	11.1488	10.3578	10.7289	10.688	10.3647	10.5568	10.3836	10.7267	9.8576	10.481	10.7947	10.6424	10.4765	10.6658	10.6225	11.4015	11.5892	11.7882	11.9579	11.687	12.0326	11.5744	11.6549	11.7792	11.7961	11.8634	11.2433	11.9164	11.6877
	23	545192	ENSMUSG00000047507	Baiap3	13.9478	13.9639	13.6503	13.6733	13.8647	13.7281	13.6617	13.5684	13.4742	13.6242	13.4545	13.4799	13.4576	13.4934	13.3419	13.3864	11.2527	10.7182	11.8706	11.5748	11.5634	12.1627	11.3304	11.0048	12.0287	11.9005	11.6097	11.9042	11.0171	11.7478	12.0359	7.054	6.4808	7.4555	7.444	6.7346	7.8193	7.636	6.5304	7.3052	6.5043	6.454	7.2094	7.5788	6.8109
	24	67498			6.4936	7.17	7.6595	7.7148	6.8927	7.2208	7.4454	7.2333	7.4511	6.9106	7.5872	7.4451	7.7221	7.6087	7.5294	7.5852	10.3451	10.9442	10.6462	10.7849	10.6606	10.0492	10.693	10.9979	10.3455	10.0746	11.1517	10.3986	10.9655	10.6369	10.5412	9.3208	9.6517	9.8467	9.722	9.5389	9.4624	9.8605	9.5517	9.5209	9.3337	9.6501	9.6183	9.7502	9.2936
	25	13142	ENSMUSG00000042096	Dao	2	4.7824	3.5268	3.9145	3.9408	2.5956	4.4034	4.9512	3.3111	4.6186	4.0692	3.1406	5.0295	4.4452	4.4476	3.7814	2	2.4868	2.9602	2	2	2	4.1242	4.4276	2.7876	2.9585	2.7973	3.1652	3.1795	2	2	7.2771	2	2.8092	4.1049	2	3.6109	3.8503	2.8397	2.7205	3.3258	2.7083	3.4162	4.475	2.8047
	26	16869	ENSMUSG00000018698	Lhx1	8.1372	7.7148	8.031	8.1287	7.65	7.9738	7.6006	8.1513	7.8402	7.7647	7.5065	7.4584	7.686	7.8594	7.7671	7.6366	4.2514	2.4868	2.9602	2	2	2.3937	2.8045	4.0992	2	3.4064	2.7973	2.6972	2.3254	2	3.6121	6.8243	3.394	3.1724	3.7357	3.048	3.4227	3.0302	2.6102	2.9793	3.4895	3.3097	3.6533	3.4222	3.6961
	27	381112			6.0504	5.3562	5.5693	5.1302	5.5899	4.4855	5.6113	5.9947	5.7533	5.3781	5.1916	4.9684	5.5543	5.2512	5.4832	5.2788	5.1481	5.0397	3.6809	2.8446	4.6111	4.7994	4.454	2.8649	4.6049	2.9585	5.7197	3.6666	4.9218	5.223	5.1652	8.25	5.2674	4.7042	4.2881	4.0248	4.2434	5.3016	4.0561	4.4683	3.8922	3.733	4.1941	3.956	3.8535
	28	14544	ENSMUSG00000058624	Gda	11.0848	11.0451	11.3436	11.532	11.0274	11.5136	11.2841	11.174	10.9565	11.2032	11.3389	11.5621	11.6372	11.4565	11.2392	11.2869	12.8792	12.8427	13.0021	12.8214	12.8813	12.7844	12.9292	12.7326	12.363	12.368	13.1333	12.5815	12.7649	12.7699	12.8308	11.8735	12.2461	12.3881	12.3549	12.2204	12.1762	12.2871	12.0451	12.1768	12.0889	12.0948	11.8403	12.2292	11.8731
	29	100503068			2	2.3562	3.5268	2	3.3659	4.0239	2.4115	3.9014	3.6397	3.1642	2.661	2.8505	2.4067	2.9458	2.7105	3.0319	8.1308	8.7189	7.6487	8.4288	8.1157	7.5194	8.5709	8.4422	7.8123	7.2125	8.3733	8.1286	8.6894	8.0755	8.3574	6.2976	6.7224	6.9468	6.5323	7.2768	6.8771	6.9648	6.6411	6.9446	6.5971	7.0309	6.4264	6.8971	6.5714
	30	16870	ENSMUSG00000000247	Lhx2	7.8696	7.4634	7.6535	6.8006	7.7121	7.4405	7.3079	7.6017	7.1058	7.3221	7.2332	7.1182	7.2773	7.2846	7.0366	7.2178	10.991	10.4284	10.8293	10.9024	10.5531	10.6145	10.5509	10.8136	10.3773	10.7739	10.3731	10.8254	10.8852	10.882	10.6879	10.624	10.5865	10.62	10.647	10.3474	10.6286	10.5684	10.5569	10.6612	10.5906	10.5077	10.5637	10.5275	10.579
	31	13655	ENSMUSG00000033730	Egr3	4.7167	5.6736	4.4303	5.7211	4.8697	5.4211	4.7248	4.9512	4.8774	5.0784	4.0692	4.3264	4.8456	4.6293	4.6068	3.0319	9.8483	9.9175	9.4062	10.0182	9.4777	8.9687	9.8722	9.636	9.844	9.2977	9.8507	9.6268	9.8563	9.4079	9.7074	9.4121	9.3152	9.2404	9.44	9.4873	9.5698	9.3564	9.6072	9.3567	9.1922	9.5447	9.381	9.1448	9.5636
	32	75404	ENSMUSG00000036198	Arhgap36	10.8811	10.9413	10.9688	11.112	10.7828	10.8503	11.0678	10.8434	10.7508	10.9023	10.8694	10.8392	10.9543	11.0681	10.7276	10.7863	7.2838	7.5714	8.2836	8.3676	8.2244	8.4631	7.9418	6.9969	8.0203	8.372	8.2175	8.0154	6.6747	7.9041	7.9225	4.8961	4.5569	4.7042	3.7357	4.323	5.3699	5.3759	3.367	4.4683	4.3837	4.8333	4.6426	4.5945	3.4223
	33	12319	ENSMUSG00000041261	Car8	8.1722	8.0188	7.9841	8.2855	8.0714	8.4744	8.0733	8.4752	8.3987	8.1213	8.3016	8.415	8.342	8.5855	8.4625	8.4717	8.4287	7.677	7.8748	7.6073	8.0889	8.7036	8.2904	8.4602	7.5015	7.7875	7.6244	7.5444	7.8177	7.5259	7.7262	11.9891	8.0364	7.6554	7.295	6.8189	7.5002	7.5342	6.7995	6.8826	7.4525	7.0768	7.1906	7.2	6.616
	34	16512	ENSMUSG00000037579	Kcnh3	5.5562	6.131	6.0233	6.4446	6.4887	7.0308	6.3556	5.9755	5.7073	6.5337	6.2044	6.0232	5.9984	6.1585	5.3089	4.8615	11.9601	11.7034	11.6307	11.7956	11.553	11.3045	11.5547	11.638	11.7276	11.6296	11.6259	11.7663	11.8229	11.7968	11.6538	10.8119	10.8066	10.5132	10.8501	10.7457	10.8579	10.5078	10.8038	10.8432	11.0187	10.8992	10.7088	10.815	10.866
	35	13386	ENSMUSG00000040856	Dlk1	12.5424	12.6231	12.5696	12.4277	12.7217	12.5085	12.6785	12.4414	12.4829	12.4673	12.5089	12.3818	12.4898	12.496	12.3307	12.4599	9.6141	8.6967	9.3432	9.1524	8.9795	9.7794	9.2846	9.0337	9.2859	9.5345	8.9308	9.4121	8.6752	9.3561	9.5599	6.9333	6.8981	7.8685	8.148	6.7703	8.3683	8.0304	6.2402	7.6316	6.9463	6.2608	6.967	8.1292	6.3777
	36	244810	ENSMUSG00000038112	AW551984	11.9843	12.041	12.2153	12.1439	11.9182	12.1828	12.1614	12.0767	12.0737	12.1022	12.1446	12.3638	12.2173	12.2427	12.1474	12.2675	9.259	8.9704	9.8987	9.4955	9.7459	10.0896	9.549	8.5848	9.5406	10.0909	9.6267	9.5714	9.0938	9.575	9.7835	6.1963	5.776	6.9929	7.4375	6.0659	7.1289	6.9405	6.2602	6.3297	5.9224	6.2448	5.7179	7.3305	5.7756
	37	15207	ENSMUSG00000028946	Hes3	2	2.3562	3.1727	2	2.7057	3.3411	2	4.546	2.8848	2.6153	2.9044	2.487	2.7237	2.4547	2.3986	2.4311	2	2	2.7052	2	2.7126	4.5126	3.995	3.7923	2.7876	2	4.1111	2.3903	3.0086	2	2	6.3769	2.7236	2.8092	2	2.3413	2.6418	2.3341	2.3371	2	2	3.0401	2.3085	2.1635	2
	38	21375	ENSMUSG00000035033	Tbr1	5.7947	5.0976	6.1978	6.681	5.8644	5.8876	6.2594	6.4345	5.7758	5.8015	4.8862	6.8434	5.1926	5.9495	5.5631	5.6825	10.4686	10.8732	10.3485	10.7183	10.4554	9.7312	10.9682	10.6937	10.8522	10.0971	11.1099	10.5569	11.1522	10.8227	10.5049	9.7555	9.9607	10.1554	10.059	10.135	10.009	10.2593	9.9809	9.9548	10.2168	9.943	9.909	9.8368	9.8737
	39	13799	ENSMUSG00000039095	En2	5.3267	5.2327	3.7223	5.3421	5.8005	5.1156	5.1028	4.6464	5.4241	4.6186	5.2368	4.5407	4.7787	5.531	4.8168	5.2788	4.2514	4.0739	2.9602	2.8446	3.5441	2.3937	4.2427	4.8671	4.4215	4.3244	3.5082	3.9245	4.5377	2.8332	5.0801	8.1985	5.0856	4.0908	4.5968	4.323	4.1854	5.3759	4.7636	4.628	4.2066	4.5508	5.9358	4.5655	4.4543
	40	51791	ENSMUSG00000052087	Rgs14	7.9024	7.7377	7.6832	7.8935	7.7799	7.7177	7.5507	7.7836	7.2809	7.6522	7.4692	7.5723	7.4908	7.2914	7.5782	6.9517	10.6962	10.5934	10.4766	10.9356	10.6526	10.1641	10.5821	10.5683	10.9111	10.4858	10.689	10.5413	10.5727	10.8668	10.4708	11.0741	10.9771	10.8984	11.0157	11.0382	11.0678	10.6094	11.1735	11.067	11.0826	11.0649	11.0876	10.8993	10.9909
	41	269637	ENSMUSG00000044681	Cnpy1	2	2.3562	2.2739	3.8044	2.3956	3.6062	2.4115	2	2.5092	2.6153	2.368	2	2	3.0783	2.7105	2	2	2	2	2	2	2	3.5192	2	2	2	2.453	2	2.3254	3.4976	2	6.6817	2.9832	3.1724	2	2.4858	2.4579	3.4978	2	2.4047	2	2	2	2	2
	42	12311	ENSMUSG00000023964	Calcr	9.1833	9.2285	9.5344	9.213	8.9398	9.2264	9.3579	8.6516	9.1404	9.033	9.1956	9.2402	9.2336	9.42	9.2644	9.4114	6.7904	5.2368	6.5471	6.3851	6.2391	7.5293	5.3691	5.5789	6.9437	7.3356	5.9779	6.1769	6.1036	6.3233	7.5865	3.4739	2	2.3228	2	2	2	2	2.3371	2	2.38	2.2765	2.3085	2	2
	43	27220	ENSMUSG00000021647	Cartpt	10.7629	10.7723	10.8562	10.5925	10.6281	10.5882	10.5183	10.5408	10.6617	10.7941	10.4714	10.3212	10.5378	10.4259	10.4607	10.6615	8.0952	8.2639	8.7821	8.7501	8.6113	8.9795	8.2972	8.1457	8.5651	9.2912	8.3669	8.7779	8.0225	8.8338	9.2201	4.8524	4.6346	5.1332	5.6614	5.0829	5.3957	5.8886	5.6227	5.8357	5.7063	5.5834	5.1091	5.3729	4.9134
	44	16520	ENSMUSG00000044216	Kcnj4	8.2214	6.8992	7.4819	6.8841	7.2917	7.5857	7.4454	7.498	6.9267	7.3538	6.7475	6.7815	7.083	7.2708	6.9795	6.9517	11.4735	11.484	11.1034	11.5838	11.1066	10.4879	11.3363	11.3625	11.5902	11.2756	11.6008	11.4506	11.6882	11.4242	11.4029	10.1355	10.1371	10.0016	10.06	10.2815	10.0624	10.1404	10.3053	10.1858	10.4596	10.4009	9.9843	10.091	10.2585
	45	13796	ENSMUSG00000033726	Emx1	2	3.2631	3.6279	2	2.9608	2.5956	2.7312	4.2594	2	2.2355	2	2	3.975	2.2452	2	2	7.7641	8.1462	7.9205	8.2518	7.9089	7.4692	7.755	7.9679	7.513	7.9884	7.7082	8.0085	8.1462	8.1248	8.1537	7.7637	7.6204	7.7254	7.9983	7.8642	7.9295	7.923	8.1765	7.9133	7.7718	7.9751	7.7781	7.8186	7.9466
	46	22139	ENSMUSG00000061808	Ttr	2.4693	5.1891	6.0418	5.8652	4.9892	6.5223	6.0454	6.7932	4.9184	4.8132	3.9657	2.8505	4.0898	5.2229	3.6904	4.5546	7.3698	9.5045	7.0914	9.0693	8.9904	9.1612	7.5519	9.5353	6.874	9.6592	5.4049	9.7084	8.4007	6.1004	7.8978	10.0388	11.2953	9.6006	8.9914	14.0357	16.0174	8.8041	9.6794	8.9662	10.2328	9.4966	15.847	13.7987	10.4071
	47	57249			9.404	9.4618	9.7501	9.7452	9.5233	9.4911	9.5377	9.3822	9.4367	9.4623	9.3083	9.6011	9.5467	9.5822	9.3901	9.6173	4.445	5.5152	6.2691	6.491	5.7501	6.6709	6.4531	3.5441	6.4151	6.1298	6.3085	6.2014	5.6305	6.0559	6.1256	3.078	3.3018	2.5864	2.2561	2.9517	3.8538	2.6052	3.0376	2.9793	2.6805	3.0401	2	2.678	2.9512
	48	75668	ENSMUSG00000034209	Rasl10a	5.2704	5.852	5.6675	4.1123	5.3432	6.3522	5.2096	5.6033	5.1765	5.5626	5.4436	5.1093	4.8456	4.9038	5.3545	4.6377	9.9694	9.8539	9.3709	10.0958	9.7308	8.9246	9.8837	9.9961	10.1692	9.3149	9.8599	10.126	9.8082	9.7264	9.6083	10.0821	9.8703	9.9277	10.3293	9.8074	10.0804	9.5791	10.1157	9.9435	9.7498	10.0504	9.6374	9.4629	10.2417
	49	78365			5.8534	6.284	6.4805	6.3884	6.0128	5.4884	6.6107	7.1069	6.47	6.5985	6.2044	5.614	6.2902	6.2456	6.3513	6.3576	2	2	3.1768	2	2	2	2	4.1886	2	2	2	2.6972	2	2.8332	2.3301	5.7489	2.7236	2.8092	2	2.3413	3.5198	2.6052	3.2117	2	2.6805	2	4.1169	3.7136	2.4577
	50	331374	ENSMUSG00000062393	Dgkk	10.2282	10.5029	10.462	10.8271	10.3202	10.4538	10.6486	10.6217	10.738	10.6282	10.6077	10.7342	10.6391	10.8375	10.5343	10.7622	6.4502	6.9017	7.3585	6.3291	7.6491	6.8226	7.5634	6.7106	7.4663	8.3303	6.9828	7.0977	6.4257	6.9155	6.6828	4.8524	3.9747	5.2134	4.4507	4.8357	5.1139	4.7512	4.3817	4.5504	4.0048	4.1991	4.4671	4.4435	4.3525
	51	20473	ENSMUSG00000038805	Six3	9.6626	9.7939	9.656	9.5838	10.003	9.4495	9.7181	9.4636	9.4332	9.4724	9.4965	9.5556	9.5239	9.6857	9.4854	9.1606	7.5385	7.991	7.7451	7.3073	8.187	8.0972	7.6835	6.9466	8.7853	8.922	7.5805	7.6192	7.7379	7.9165	7.6618	4.8961	2.8592	4.1733	4.3444	4.5699	5.2617	5.4465	3.2117	2.9793	4.0048	3.4277	6.8995	4.7823	4.4043
	52	21869	ENSMUSG00000001496	Nkx2-1	9.8865	9.591	9.3507	9.3244	9.4653	9.4453	9.4479	9.7053	9.5289	9.3648	9.1193	9.1695	9.7194	9.4539	9.2703	9.4973	5.7345	5.1741	6.0938	4.6259	5.6435	5.6919	5.3691	4.2727	5.6985	6.9736	5.9087	6.1264	6.0822	5.7555	5.2842	3.8744	3.0974	4.1733	3.9683	4.0248	3.6965	5.2629	3.0376	3.708	3.141	3.6382	4.9843	4.0426	3.6105
	53	22353	ENSMUSG00000019772	Vip	8.1293	7.1244	7.9649	7.7744	7.9806	8.3802	8.2712	5.6524	8.2219	7.8291	5.9569	8.001	8.2949	8.9105	8.2678	7.6666	9.0918	9.2392	9.0695	9.1882	9.2545	8.8442	9.1085	9.4361	8.7516	8.8648	9.2078	8.9436	9.5426	9.3856	9.1874	8.2709	8.5006	8.4137	8.2061	8.422	8.342	8.2782	8.09	8.5287	8.6631	8.4109	8.2315	8.1513	8.1076
	54	116849	ENSMUSG00000090461	Iltifb	2	2	2.2739	4.7691	2	2	2	2	2	2	2	2	2	2.4547	2	2	4.839	3.3814	2	2	2	2	4.3522	2	2.4469	3.1237	2	2	3.1795	2	2	5.4299	2.8592	2.5864	2	2	2	2	2	2	2	2.2765	2.3085	2	2
	55	27206	ENSMUSG00000052854	Nrk	2	2.3562	3.0323	2	2.7057	3.016	2	2	2.2769	2	2	2	2	3.4154	2	2.7625	2	2.8501	2	2.8446	2.9694	2	3.995	4.2727	2.7876	2	2.7973	2	2	2	2	5.6755	3.2032	3.5879	2	2.6171	2.4579	2.3341	2	2	2	2.5085	2.9661	2	2.6416
	56	268482			5.1506	3.4223	3.7223	2	2.3956	2.5956	2	2	3.1825	3.7246	2.368	3.382	3.2034	2.7999	4.6802	2	8.8524	9.4525	8.8188	9.1114	8.7801	8.7961	8.8852	9.1411	8.2021	8.6847	8.9177	8.9581	9.2143	9.1884	9.3	6.5782	6.9293	6.4961	6.3382	7.0916	6.3521	6.9158	7.1807	6.3297	6.9179	6.8312	6.5193	6.8257	6.8109
	57	19109	ENSMUSG00000021342	Prl	3.8839	9.9376	3.8944	2	8.0021	4.7274	10.6522	2	3.7345	3.3761	4.9953	2	2	6.0498	10.9574	6.6454	2	2.8501	8.5783	6.491	3.694	7.2725	4.2427	11.1257	2.4469	4.1818	2	3.1652	2	7.4332	4.3544	8.1177	7.6346	3.0022	3.2385	4.0248	4.5951	9.7892	2.3371	3.9689	2.929	2.7083	2.7784	2	3.4223
	58	27385	ENSMUSG00000056972	Magel2	10.7043	10.6348	10.3802	10.5344	10.6095	10.7217	10.6953	10.3915	10.4974	10.6067	10.2811	10.3988	10.7271	10.4482	10.2731	10.306	7.4734	7.1338	8.2601	8.0238	8.0407	8.5766	7.8792	7.5288	8.1366	8.5165	7.6351	8.2514	7.7583	8.1194	8.1948	4.8961	5.0577	5.0483	5.6614	4.7236	5.5646	5.4116	3.7523	5.0787	4.2979	4.699	5.5519	5.8757	5.0819
	59	100043757	ENSMUSG00000050600	Zfp831	7.0403	7.1922	7.0976	7.3239	6.9962	7.5068	7.129	6.7711	7.0516	7.0638	7.1647	7.1674	7.3366	7.4218	6.7934	7.0909	9.9152	9.8489	9.8204	9.4987	9.8692	9.6747	9.6782	10.0387	9.4143	9.408	10.142	9.604	9.5426	9.6442	9.593	9.6589	9.849	9.8037	9.9316	9.8091	9.8311	9.5593	9.8926	9.7068	9.656	9.6226	9.5354	9.676	9.833
	60	22784	ENSMUSG00000029151	Slc30a3	7.3902	6.3646	5.6436	5.2187	6.2703	6.554	5.6497	5.7459	6.3553	6.3947	6.2044	6.1912	5.5938	5.5539	6.4596	6.8682	11.6849	11.6575	11.3964	11.707	11.3105	10.8525	11.3846	11.832	11.5662	11.2372	11.953	11.5827	11.7514	11.7963	11.4344	10.458	10.1717	10.2723	10.1397	10.3714	10.1418	10.0889	10.6113	10.4504	10.4385	10.6587	10.1949	10.1688	10.6998
	61	18741	ENSMUSG00000028023	Pitx2	9.0723	8.5964	8.6926	8.3309	8.5795	8.4493	8.7091	9.1151	8.9852	8.85	8.8733	8.5632	8.8697	8.8446	8.6885	8.9814	2	2	2	2.8446	2	2	2.4576	2	3.4934	2	3.075	3.6666	3.0086	2	2	2.7369	2	2	2	2	2.8049	2	2	2	2	2.5085	2	2	2.2469
	62	22255	ENSMUSG00000029546	Uncx	7.8978	7.3392	7.1831	7.0621	7.5171	7.4061	7.5199	7.3346	7.2411	7.1015	7.1647	7.2305	7.1639	7.1852	7.1701	6.7611	3.9014	4.3257	4.1593	4.881	5.061	4.2525	3.995	2.8649	5.4812	3.9372	3.5082	5.2308	4.4735	5.1402	5.1652	5.5165	2	4.0033	2	3.048	2.4579	3.0302	2.6102	2	3.141	2.8837	2	2.678	2
	63	278304	ENSMUSG00000014198	Zfp385c	3.3435	3.696	3.3006	2	3.3659	3.8301	3.4061	2	4.0615	3.5609	3.8541	3.9302	3.3942	3.3115	4.6068	2.7625	2	2.4868	3.6809	2	2	3.935	4.2427	2	3.9653	2	2	2	3.0086	2.334	3.1926	5.9899	3.3018	3.3246	3.1145	3.3793	2.8049	3.4978	3.367	2.4047	2	2.8837	2.3085	2.7824	2.2469
	64	13599	ENSMUSG00000026247	Ecel1	11.7076	11.8494	11.6884	11.3431	11.7786	11.6409	11.6634	11.6344	11.4283	11.5883	11.5171	11.2896	11.5051	11.2634	11.1312	11.3172	9.6141	9.09	10.3387	9.4404	9.5679	10.1922	9.5111	9.196	10.138	10.1769	9.9271	9.8761	9.4908	9.9435	9.6824	5.7489	5.8266	6.4799	6.1299	6.2081	6.5491	6.3422	5.4938	6.4838	6.254	6.0743	5.9132	6.8913	5.8334
	65	54713	ENSMUSG00000021743	Fezf2	6.067	6.0357	5.0919	6.2897	5.2976	6.4566	5.6872	6.069	5.8831	5.2224	5.6581	5.4111	5.3848	5.7254	5.4416	5.7587	8.6707	7.7325	8.3631	8.1423	7.6399	7.8291	8.2414	8.0946	7.9627	7.4411	8.0748	7.8071	8.3479	8.4977	7.7745	9.3408	9.6103	9.5818	9.7127	9.5797	9.9901	9.5148	9.427	9.6192	9.8606	9.5332	9.0993	9.5959	9.4996
	66	20464	ENSMUSG00000019913	Sim1	8.1332	8.1667	8.3958	8.701	8.4502	8.0974	8.2712	8.7252	8.7274	8.2877	8.4952	8.841	8.6811	9.0801	8.6525	8.7254	2	6.424	4.0537	6.1139	7.2973	4.9239	6.8391	4.7546	6.1752	5.9434	6.1376	6.1006	4.8221	4.8586	5.845	2.5305	2	3.1724	2	2	2.4579	2	2.3371	2	2	2	2	2	2.2469
	67	17868	ENSMUSG00000002100	Mybpc3	2	2	2	2	2	3.016	2	2	2	2	2.368	2	2	2.6376	2	2	4.445	2.4868	3.6809	2.4833	2.7126	3.1732	4.3522	2	2.4469	3.1237	3.3078	2.9501	3.4704	2	3.3464	5.3057	2.7236	2.5864	4.3444	2.8486	3.2062	2.6052	3.0376	3.708	2.929	3.9056	3.7587	3.2868	3.7769
	68	13813	ENSMUSG00000032446	Eomes	2	2.8797	4.4303	4.0168	4.1603	2	2	3.9014	3.3111	2	2	3.1406	2.4067	2.9458	2.7105	2.7625	3.2436	3.14	2	3.1334	3.3767	2.7027	3.8532	4.4276	3.6684	2.7718	3.075	2.3903	2.3254	3.0301	3.8364	6.2309	4.6346	4.3254	3.4583	5.6257	3.3185	5.1824	3.5072	3.708	3.77	3.3097	4.5865	5.0143	3.9953
	69	18420	ENSMUSG00000021685	Otp	9.4007	8.8555	8.593	8.1457	9.0877	8.8389	9.0301	8.5189	8.5	8.6758	8.4906	8.507	8.4588	8.736	8.4934	8.3038	4.7683	3.14	5.8316	4.7161	4.365	5.5828	4.454	6.0534	5.7383	6.8842	4.2293	5.6433	4.1833	5.2627	5.7924	2.2895	2	2	2	2	2.247	3.0302	2	2	2.6805	2	2	2.678	2
	70	383787	ENSMUSG00000078137	Ankrd63	5.8725	5.8797	5.0193	5.1752	6.4053	6.2	5.4894	6.0323	5.7305	5.8197	5.047	5.1749	5.7763	6.0498	5.5631	5.4723	10.1831	10.3057	10.1077	10.0704	10.001	9.6967	10.0412	9.8616	10.3422	10.2602	10.3731	10.0985	10.1502	10.16	10.0061	8.9081	8.938	8.8085	9.0727	8.8518	9.2941	8.7735	8.9563	9.0067	9.259	8.7565	8.7002	9.1738	8.7115
	71	109272	ENSMUSG00000020061	Mybpc1	4.2178	3.2631	2	2	2.7057	2	2.7312	3.8178	2.2769	3.1642	3.1126	3.382	2.9834	3.4154	2.7105	2.7625	6.0346	5.7047	4.8686	5.8998	5.3592	5.6919	6.4031	5.4034	2.7876	6.346	5.9437	5.8748	5.6305	5.4463	6.8335	7.396	5.6876	5.8867	3.5568	5.4606	5.6314	6.0334	5.1532	5.2358	5.2384	4.995	4.8947	5.6461	5.3431
	72	20604	ENSMUSG00000004366	Sst	11.5526	11.4429	11.4934	11.2211	11.8724	11.5514	11.4782	11.0408	10.9965	11.191	11.1824	10.9743	10.9581	10.9951	10.9775	10.9455	12.1687	11.9004	12.2356	12.4757	12.0944	12.3218	11.856	11.8251	12.312	12.3062	12.4397	12.3617	12.0819	12.2949	12.0742	11.7934	11.8057	11.7771	11.8252	11.6063	12.1127	11.8151	11.6898	11.8528	11.9179	11.8767	11.4477	11.6681	11.8279
	73	64290	ENSMUSG00000059246	Foxb1	9.4507	8.3512	8.7939	8.9827	8.2494	8.6681	8.3137	9.4235	8.9972	8.7888	8.4999	8.6349	8.9555	8.8677	8.8445	8.9163	4.1439	3.14	2	2	2	3.935	2	2	2.4469	4.6834	3.3078	3.8013	3.9195	3.358	4.0305	2	2	2	2	2	2	2	2	2	2	2	2.9661	2.1635	2
	74	226413	ENSMUSG00000026354	Lct	3.547	3.2631	2.504	4.0168	3.3659	2	2	3.9805	2.5092	2	3.1126	2.487	2.7237	2.7999	2.7105	2.4311	4.6157	5.2368	3.8162	4.5298	4.6111	3.935	4.3522	4.8671	3.2942	4.2549	5.7197	3.8013	4.7695	5.4804	3.4853	10.1592	10.1512	9.8962	9.8108	10.3474	9.9622	9.665	10.6544	10.1134	10.1075	10.4241	10.089	9.3486	10.4362
	75	235604	ENSMUSG00000032936	Camkv	12.4713	12.4433	12.2095	12.1432	12.5008	12.2666	12.1572	11.9523	11.8868	12.2332	12.0987	12.1222	12.1281	11.99	12.0883	11.9744	13.823	13.4144	13.669	13.6387	13.5615	13.6324	13.3502	13.5639	13.58	13.5448	13.663	13.62	13.5872	13.7237	13.6012	13.7715	13.8135	13.6936	13.9355	13.834	13.9569	13.6814	13.9034	13.8882	13.9484	13.9004	13.6483	13.9205	13.9355
	76	14404	ENSMUSG00000031340	Gabre	8.9565	9.1018	8.9965	9.2449	9.005	8.8517	9.0118	9.1129	8.978	8.9732	8.8625	8.7685	8.8207	9.0278	8.7665	8.7254	5.6188	4.0739	4.7384	5.2259	4.6846	5.6919	4.5491	3.902	5.5721	6.1491	5.5483	5.905	4.8221	5.0969	5.7379	3.078	2.5738	2.5864	2.4734	2.4858	2.4579	3.7421	2	2	2.38	2.2765	4.0353	3.3561	2.4577
	77	20271	ENSMUSG00000032511	Scn5a	9.6857	9.4709	9.5393	9.0893	9.8594	9.358	9.412	9.3094	9.2265	9.2965	9.2816	9.244	9.2367	9.374	9.1909	9.1251	9.3096	9.7977	9.8562	9.8417	9.8272	9.7418	10.0351	9.7039	10.1765	9.5216	10.0922	9.9863	9.3547	9.5887	10.009	5.205	6.3941	5.0913	6.0476	5.9831	5.9946	6.2661	5.1953	5.2358	5.9508	5.2079	5.0687	6.1537	5.7558
	78	11831	ENSMUSG00000043144	Aqp6	2	2.8797	3.4181	2	4.1603	3.8301	3.9892	2	2.7091	2.4379	2.661	3.382	3.2034	4.2899	3.1845	2.4311	2	2	3.1768	2.4833	2	4.2525	2	2	3.4934	2	4.5351	2.6972	2.5907	3.2033	2	6.3614	2.4067	2	2.2561	2.3413	2.6418	3.2035	2	2.4047	2	2	2	2.8797	2.4577
	79	240058			9.8009	9.7552	9.6679	9.2343	9.8476	9.6091	9.3579	9.5761	9.3514	9.4853	9.4637	9.3221	9.1827	9.343	9.2703	9.5001	10.6854	11.0539	10.7138	11.058	10.9708	10.3614	10.8459	10.6531	11.2915	10.8996	11.2238	11.0893	11.0311	10.9421	10.8061	8.5899	8.3301	8.7289	8.599	8.6365	8.6219	8.543	8.6585	8.7489	8.5609	8.5893	8.3073	8.475	8.6511
	80	73191	ENSMUSG00000029697	Fezf1	8.8011	8.8094	8.6147	9.1068	8.6492	8.9682	8.8684	8.2974	8.2898	8.6632	8.4287	8.5935	8.5618	8.6428	8.5435	8.617	2	4.9675	5.9831	5.9748	5.1674	5.5052	4.6383	4.4992	5.6155	4.7856	4.7872	6.1769	5.6007	5.6988	5.7924	2.7369	2	2	2.4734	3.2231	2.247	2	2.3371	2.4047	3.141	2.5085	2.5625	2.9708	2.4577
	81	16997	ENSMUSG00000002020	Ltbp2	2	3.0841	3.9733	2	2.9608	4.0239	3.864	2	3.3111	4.0051	3.456	3.7695	3.8502	3.3115	4.0642	3.0319	2.7518	4.0739	3.8162	3.1334	3.5441	3.1732	3.084	3.7923	4.3203	2.7718	4.2293	2.9501	3.4704	3.625	4.5571	7.1383	3.5625	2.5864	2.2561	3.048	3.3185	2	3.6349	3.3892	3.3258	3.0401	3.5396	3.6599	3.5195
	82	17171	ENSMUSG00000068037	Mas1	2.4693	2.8797	3.1727	2	2.3956	3.8301	3.2142	3.5331	2.5092	3.3761	2.9044	2.487	4.5571	2.6376	3.8261	2.4311	8.6707	8.9139	8.505	8.6734	8.4147	8.2054	8.7517	8.543	7.8851	8.0359	8.9568	8.8612	8.6894	8.8856	8.5985	8.8482	9.1645	9.3794	9.4513	9.3441	9.4912	9.2786	9.389	9.088	9.0052	9.3585	9.0061	9.0249	9.4573
	83	16392	ENSMUSG00000042258	Isl1	8.8331	8.845	8.6631	9.2317	8.6171	8.9799	8.852	8.6696	8.6746	8.5721	8.6241	8.5995	8.921	8.9172	8.5679	8.9492	2.7518	4.8113	4.0537	3.9204	5.1674	6.1654	4.1242	2.3491	5.3331	6.3626	4.2293	4.9115	3.3322	3.8502	5.0355	3.2223	2.2176	2	2.2561	3.048	2.4579	2	2	2	2.6805	2	3.1322	2	2.6416
	84	12919	ENSMUSG00000021680	Crhbp	8.4637	8.1035	7.8855	8.5299	8.207	8.1082	8.0082	8.5484	8.1762	8.4574	8.2474	8.1553	8.3362	8.1083	8.3601	8.5648	9.1346	8.9887	9.2144	9.2834	9.2665	9.1863	8.8056	9.4062	8.9426	8.3261	9.6348	9.0042	8.9799	9.2266	8.7715	9.4819	9.5133	9.4942	9.1077	9.4248	9.4776	9.3074	9.2808	9.3849	9.3918	9.5593	9.1679	9.376	9.3275
	85	20957	ENSMUSG00000027855	Sycp1	2	2	2	2	2	2.5956	2	2	2	2	2	2	2.7237	3.0783	2	2	2	2	2	2	2	2.957	2	2	2	2	2	2	2.5907	2	2	5.2394	2.2176	2	2	2	2	2.3341	2	2	2	2.5085	2	2.1635	2.2469
	86	21419	ENSMUSG00000025927	Tfap2b	2	3.5656	3.7223	2.3528	4.4374	5.0279	2.9928	2	3.8235	3.8	3.456	3.382	2.7237	3.603	2.9669	3.0319	4.3515	5.8321	3.5316	4.5298	3.1874	2.957	3.8532	4.9202	4.5161	4.3908	2.453	5.132	4.2615	3.4976	3.1926	6.6565	3.4807	3.0022	2.4734	3.5202	2.8049	4.5732	3.6349	3.3892	4.0048	2.5085	4.1169	3.7655	2.9512
	87	19229	ENSMUSG00000059456	Ptk2b	9.0599	9.1136	8.8681	9.2967	9.2902	9.7321	9.2587	8.8955	8.7388	9.3239	9.1696	9.0565	9.0995	8.833	9.4438	8.9451	13.2132	13.3497	13.1148	13.3433	13.0791	12.7298	13.2953	13.1927	13.2721	13.0175	13.6699	13.2391	13.3375	13.3723	13.0725	14.1251	14.2098	14.1694	14.2392	14.311	14.2759	13.9613	14.4754	14.1563	14.0917	14.4223	14.0644	14.0531	14.417
	88	11878	ENSMUSG00000035277	Arx	8.507	8.2056	7.9601	8.1172	8.2131	8.2013	7.6298	7.2414	7.7466	7.6923	7.9412	7.8585	7.7572	7.8686	7.949	7.7152	8.56	8.4072	8.9715	8.9397	8.8295	8.7548	8.6155	8.759	9.1188	9.1689	8.6943	8.6364	8.7885	8.7903	8.8281	8.1853	8.1198	8.2897	8.187	8.2606	8.5575	8.372	8.1447	8.6958	8.6759	8.1782	8.1222	8.3511	8.1947
	89	110886	ENSMUSG00000055078	Gabra5	9.9663	9.8156	10.1113	10.0376	10.0449	10.1558	9.9065	9.9348	9.9291	10.0382	10.0679	10.0022	10.302	10.0264	10.1264	10.2007	9.5602	9.6813	9.8164	9.6971	9.9081	9.5522	9.7649	9.5916	9.6825	9.8078	9.8275	9.7465	9.7433	9.8341	9.7767	11.6111	11.7234	11.7161	11.7877	11.7273	11.6285	11.5999	11.769	11.6841	11.6843	11.7733	11.6826	11.6489	11.663
	90	20562	ENSMUSG00000025020	Slit1	11.56	11.528	11.3141	11.4337	11.7708	11.4601	11.5831	11.3279	11.2667	11.4857	11.2556	11.3181	11.185	11.238	11.0425	11.019	11.3183	10.6707	11.1239	10.8879	10.6798	10.8854	11.0178	10.7572	10.9987	10.6898	11.3102	11.039	10.7569	11.0881	11.0404	11.9941	12.1532	12.2004	12.2587	12.2693	12.2993	11.937	12.4166	12.2527	11.9534	12.3517	11.918	12.0941	12.3253
	91	18167	ENSMUSG00000028004	Npy2r	9.1388	9.1048	9.3544	9.4138	8.848	8.9264	9.0908	9.2001	9.3421	9.0715	9.2654	9.2854	9.4639	9.348	9.1101	9.429	8.4683	8.2789	9.1834	8.7501	8.9084	9.3283	9.2777	8.6412	8.5371	8.5165	9.2712	8.7779	8.5716	8.6847	8.6658	9.886	10.1438	10.1806	10.3714	10.0395	10.1197	10.222	10.2085	9.8433	9.5988	10.2961	10.0597	10.0986	10.2256
	92	245526	ENSMUSG00000031212	Pgr15l	8.2361	8.3463	8.6055	8.8813	7.9515	8.5784	8.5556	8.4088	8.452	8.2069	8.5229	8.7417	8.7306	8.751	8.5533	9.2089	2	3.3814	5.2965	5.1632	3.694	5.4647	4.6383	2.6299	5.1681	4.9706	5.1884	5.3233	3.9195	4.6348	5.5917	3.078	2	2.5864	2.4734	3.1382	2.247	2	2	2.4047	3.4895	2.7083	2.7784	2.7824	2.2469
	93	76161	ENSMUSG00000027270	Lamp5	7.5991	7.2676	7.689	7.5369	8.0092	8.02	7.7846	7.4845	7.6033	7.8425	7.8569	7.7335	7.6951	7.6518	7.4157	7.9116	9.9694	10.4149	9.9382	10.2203	9.9847	10.0111	10.111	10.1458	10.2211	10.2491	10.3986	10.2237	10.6105	10.2455	10.2812	9.2822	9.1775	9.3531	9.1117	9.4937	9.1649	9.5791	9.3685	9.3191	9.1065	9.3473	9.1963	9.3486	9.4434
	94	664805	ENSMUSG00000091519	Skor2	3.8839	2	4.1193	2	3.1775	2	2	3.8178	2.5092	3.0453	2.9044	2.487	2.9834	3.1996	2.7105	3.0319	2	2	2	2	2	2	2	2	2	2	2	2.3903	2	2	2	5.4882	2.5738	2	2	2	2	2	2	2.7205	2.6805	2	2.5625	2	2.4577
	95	98970	ENSMUSG00000026841	Fibcd1	8.0009	7.8043	8.0853	7.554	8.1946	7.1602	7.5507	7.3042	7.8024	7.9164	7.9275	7.5478	7.7309	7.8548	7.4891	7.5642	8.4515	7.5955	8.1933	7.8946	7.7381	8.0156	7.9593	8.1457	8.2372	8.0918	7.5354	8.3147	8.3789	8.6439	7.8146	11.8014	11.823	11.438	12.1831	11.6954	12.2319	11.6657	11.7217	11.9757	12.0635	11.8558	11.5365	12.0679	11.8031
	96	109620	ENSMUSG00000054889	Dsp	5.4074	5.3562	5.464	3.8044	4.7395	5.2764	6.2594	5.9755	4.7471	5.873	5.4436	4.8924	5.2431	5.6422	5.3987	5.0553	4.3515	3.9294	4.2577	5.2259	3.1874	3.935	3.6959	4.6948	4.8426	4.2549	3.075	5.026	4.5993	3.7419	2.8249	10.486	10.4203	10.4882	10.1287	10.8259	10.3633	9.8749	10.996	10.4315	10.1917	10.8285	10.2793	9.9142	10.6697
	97	213208	ENSMUSG00000044244	Il20rb	4.2762	4.1244	3.3006	4.6468	4.1603	2.5956	2	3.729	3.0413	3.1642	3.7332	3.5887	2.7237	2.6376	3.1845	2	4.6157	2.8501	3.1768	3.3739	2	3.8115	3.084	2	3.2942	3.5293	3.075	3.518	3.3322	2	2.3301	7.1015	6.3254	5.8621	5.9782	6.1765	5.7761	6.1438	6.1994	5.8681	6.0849	6.6488	6.164	5.8155	6.2132
	98	16873	ENSMUSG00000029595	Lhx5	8.706	8.3413	8.3186	8.5683	8.0302	8.5629	8.1624	7.8377	7.8925	7.9374	7.7283	7.9457	8.0545	7.9871	8.1563	8.0084	3.2436	3.7688	4.0537	5.2259	3.9539	3.6764	5.3691	5.6435	5.2252	3.8455	4.4402	4.9699	4.715	4.2952	4.3544	5.5715	3.3018	2.8092	2.979	3.6486	2.9514	2.3341	3.2117	3.1988	3.141	2.7083	3.9489	3.9107	2.9512
	99	16170	ENSMUSG00000001741	Il16	5.02	5.4699	5.9666	5.919	5.7675	6.4226	5.309	4.5971	5.5598	5.4961	5.723	5.7494	5.472	5.7254	6.0799	4.8615	6.7359	6.5027	6.2925	6.491	6.5258	6.598	7.203	7.1269	5.7383	6.1491	6.6427	6.5655	6.5863	6.2659	6.448	10.1137	9.7434	9.8855	9.8743	9.8949	9.9826	9.5148	10.088	9.709	9.2447	10.0096	9.6443	9.6058	10.0679
	100	12404	ENSMUSG00000031654	Cbln1	11.2866	11.2619	11.2105	11.1134	11.3821	11.2749	11.1622	10.92	11.0049	11.1511	11.2251	11.2272	11.1564	11.085	11.0616	11.0152	7.6991	7.5591	7.1693	6.491	7.3434	7.4895	7.5747	7.6438	7.5911	7.8771	7.2989	7.6374	7.6534	7.5177	7.5553	10.5736	7.3069	7.4472	7.4946	7.4931	6.8679	7.9896	7.2118	7.7579	7.7314	7.0309	7.5476	7.3853	6.154
	101	20907	ENSMUSG00000007207	Stx1a	10.1047	10.0516	9.9352	9.7983	10.1876	10.0232	9.8744	9.652	9.5728	9.9143	9.8271	9.7725	9.6878	9.5454	9.7015	9.5758	12.0766	12.1087	11.8594	12.2878	11.9331	11.5189	11.8751	12.0846	11.9646	11.6926	12.2137	12.148	12.3289	12.2373	12.0037	10.5727	10.4702	10.5082	10.6877	10.6449	10.7336	10.6493	10.6722	10.6427	10.6459	10.6382	10.3911	10.5782	10.6848
	102	330695	ENSMUSG00000048644	Ctxn1	10.9102	11.1898	11.0393	10.7165	11.3794	10.8326	11.031	10.8275	10.7416	10.9512	10.855	10.7863	10.7718	10.757	10.5638	10.6788	12.9589	12.7001	12.8773	13.0869	12.6119	12.553	12.6202	12.6767	12.7393	12.8157	12.9147	12.895	12.9341	12.9693	12.7998	12.3758	12.2893	12.2117	12.4692	12.3513	12.5666	12.3547	12.4329	12.4459	12.6099	12.4076	12.2238	12.3176	12.4459
	103	320038			5.6911	6.4957	6.5205	7.0135	5.3873	6.5851	6.8106	5.3589	6.4837	6.6298	6.5106	7.1512	7.1769	6.9633	6.2096	6.4976	8.7914	8.6571	8.4279	8.1423	8.5779	8.5283	8.6588	8.358	7.7259	8.4674	8.3669	8.0497	8.3116	8.6439	8.3483	8.4828	8.8754	9.035	8.6333	8.4531	8.4721	8.8341	8.4786	8.7747	8.2079	8.3412	8.8509	8.5692	8.6322
	104	12405	ENSMUSG00000024647	Cbln2	9.5576	9.7288	9.6485	9.7151	9.6027	9.5939	9.3866	9.7707	9.5872	9.3429	9.5646	9.7751	9.6555	9.8581	9.8542	9.7375	7.2583	8.4607	7.5059	8.7921	8.6713	7.7472	8.5423	8.3041	8.6768	8.1018	7.9683	8.2396	7.9535	7.9775	7.9765	7.1654	7.3651	7.0487	7.0715	7.3111	7.3365	7.1456	7.3012	7.169	7.7797	7.247	7.1033	7.2644	7.1663
	105	241794	ENSMUSG00000074575	Kcng1	4.0269	5.6088	6.2303	5.7511	6.0681	7.0081	5.7237	6.6674	5.6354	6.0988	5.9297	5.7056	5.8102	6.2172	5.6751	5.3788	9.8158	9.4459	9.6656	9.6233	9.1546	9.2352	9.4752	8.9306	9.3864	8.8323	9.9423	9.5854	9.4201	9.6348	8.8313	8.5006	8.8933	9.1103	9.4008	8.794	9.3807	8.8406	8.8218	9.2806	8.802	8.7251	8.303	8.8633	9.0572
	106	65255	ENSMUSG00000042607	Asb4	9.562	9.742	9.8528	10.0855	9.3528	9.8261	9.8602	9.974	9.9698	9.9756	9.8252	9.984	10.0524	9.9932	9.7725	10.0609	5.0914	4.5399	5.2008	5.2259	3.3767	5.2906	4.5491	6.123	5.3331	5.5949	3.5082	4.3331	5.1852	4.8058	5.1652	2.2895	3.5625	3.1724	3.7357	3.927	3.5198	3.8503	3.0376	4.1898	4.2979	3.6382	5.0687	4.0426	4.0613
	107	268595	ENSMUSG00000094910	D430019H16Rik	11.8158	11.7808	11.9928	11.8892	11.9595	11.9236	12.0575	11.9363	11.8241	12.0336	11.8919	11.8023	11.882	11.9039	11.7538	11.8372	12.9472	12.5556	12.8674	12.5907	12.9368	12.6702	12.7362	12.6551	12.3421	12.7819	12.4715	12.7306	12.5092	12.4939	12.5278	12.1747	12.1604	12.2077	12.2435	12.1008	12.2579	11.9095	12.2985	12.2804	12.2393	12.1155	12.0266	12.3362	12.2332
	108	64242	ENSMUSG00000021032	Ngb	10.3117	10.4611	10.5124	10.1739	10.7086	10.3716	10.5287	10.1371	10.1813	10.4691	10.3724	10.3212	10.2567	10.2804	10.0762	10.3421	9.2165	8.2714	9.3599	9.2461	9.0191	9.4524	8.3836	8.5	8.3887	9.4669	8.7596	9.0757	8.5868	9.0016	9.344	5.2394	4.6719	5.6765	5.3677	5.0368	5.2895	6.3788	4.3817	5.8997	5.1915	4.5508	5.1867	5.9671	5.2612
	109	58208	ENSMUSG00000048251	Rit1	8.5667	8.1094	8.2168	8.2752	8.1568	8.6239	8.3375	8.3653	8.2013	8.136	8.4812	8.0368	8.4154	8.2659	7.9785	8.1914	11.4341	11.3591	11.2607	11.2802	11.1257	11.0021	11.4508	11.1425	11.2688	11.4246	11.4681	11.2145	11.218	11.2363	11.1581	11.8071	11.8428	11.8878	11.7817	11.8744	11.6404	11.64	11.8948	11.8169	11.9309	11.8067	11.8042	11.582	11.859
	110	13390	ENSMUSG00000041911	Dlx1	9.0369	8.6294	9.0679	8.4269	8.812	8.6388	8.5607	8.38	8.6625	8.5339	8.5137	8.8907	8.6811	8.731	8.5386	8.8869	7.621	7.5468	7.913	7.8946	7.6306	8.2358	8.0351	8.6253	7.7936	8.2342	7.8807	8.2455	7.9652	7.9165	8.264	7.4989	7.6251	7.8498	7.8507	7.4716	7.6791	7.8597	7.5156	7.5542	7.6298	7.5303	7.8692	7.7494	7.1887
	111	100043902			8.2903	8.2698	8.3559	8.3408	8.5063	7.9502	8.4452	7.9887	8.0666	8.1965	8.0337	8.2947	8.3535	8.2729	8.0972	8.0393	6.5588	7.0313	6.9515	6.5412	7.712	7.1116	6.9992	7.3944	6.9093	7.5756	6.532	6.946	6.4426	6.9402	6.934	4.3219	2.5738	3.9101	3.7357	4.434	4.8777	5.0971	3.2117	2	3.8922	3.8219	6.023	3.9107	4.2988
	112	13162	ENSMUSG00000021609	Slc6a3	6.6342	8.7693	6.7949	9.4531	6.3394	8.0866	10.5209	8.2974	10.24	7.9206	9.966	8.7843	9.7437	10.2465	9.4253	8.291	5.3061	2.4868	4.518	2.8446	2	4.431	4.8769	4.004	4.9817	2.7718	3.075	4.1432	4.4062	3.7419	2.5986	2.7369	3.4807	3.0022	2	2.8486	2.6418	3.2035	2.8397	3.3892	2	3.5368	3.2812	3.2868	3.5195
	113	245424	ENSMUSG00000036357	Gpr101	10.703	10.7677	10.9236	10.8532	10.7398	10.8959	10.9437	10.6454	10.9211	10.8277	10.6728	11.0174	10.8904	11.0686	10.9009	11.076	9.4988	8.8042	9.8582	9.4827	9.2962	9.9773	9.0769	8.1624	8.7072	9.7709	8.7349	9.4094	8.8562	9.3376	9.7902	6.8579	7.3128	7.9291	8.4785	7.4141	8.4321	7.8269	7.3298	7.8977	7.273	7.1558	6.8042	8.4235	6.6378
	114	628779	ENSMUSG00000078591	Hs3st4	9.6139	9.723	9.6212	9.5308	9.6374	9.7076	9.6126	9.6368	9.4664	9.5261	9.7629	9.8372	9.6969	9.6516	9.7321	9.7209	10.5694	10.7454	10.2667	10.7019	10.6446	10.1578	10.8176	10.3984	10.5702	10.4999	10.4543	10.847	10.67	10.5209	10.4792	11.1358	11.2071	11.4005	11.386	11.23	11.4123	11.2831	11.4146	11.4342	11.2011	11.3542	11.3142	11.3768	11.352
	115	382571	ENSMUSG00000051726	Kcnf1	9.8783	9.8563	10.0478	10.0284	10.34	10.1218	10.05	9.8386	9.8611	10.0196	9.9942	9.8423	9.8575	9.8477	9.8037	9.7375	12.1488	12.1967	11.8865	12.0839	11.7983	11.5446	12.2283	11.9992	11.9328	11.4904	12.3862	12.0512	12.0111	11.9202	11.8115	10.0856	10.573	10.418	10.6131	10.5719	10.7944	10.469	10.3618	10.6155	10.5598	10.3708	10.0966	10.6601	10.4071
	116	104382	ENSMUSG00000034384	Barhl2	6.31	6.2419	6.3681	4.8818	5.6272	5.4884	6.1294	6.8469	6.3099	6.3825	5.7544	6.2226	5.8757	6.6272	6.1332	6.2295	5.578	6.0575	6.7295	6.4123	6.4852	5.7603	7.1125	6.7405	6.9606	5.4152	6.8781	6.2014	6.2451	6.3965	6.4649	5.928	2.9832	2	2	3.1382	2.6418	3.4978	2.8397	2	2	2.8837	2.3085	3.2141	2
	117	19649	ENSMUSG00000032128	Robo3	4.3323	4.7824	4.3732	4.4415	3.6818	5.4211	4.3104	5.7905	5.3362	4.9184	4.8862	4.4376	3.7136	5.2229	4.5294	4.4665	7.4283	8.0446	6.6412	6.2708	6.7984	6.7903	6.659	6.649	7.3427	6.0904	6.7455	6.9166	7.785	7.3619	6.9934	8.6064	8.8794	8.7255	8.1598	8.9469	8.4872	8.6702	8.9926	8.8455	8.8742	9.014	8.9207	8.2109	9.1549
	118	14403	ENSMUSG00000029054	Gabrd	5.2414	4.8953	4.3138	3.4125	5.8328	5.4211	3.4061	4.2594	4.9582	6.1857	5.9837	4.3264	4.5571	4.2342	7.2446	4.6377	9.7736	9.9436	9.0763	9.8317	9.5434	8.6232	9.4782	9.3149	9.7078	9.412	9.6321	9.5063	9.9359	9.8618	9.4	9.6236	9.0072	8.6191	8.6557	8.8485	8.7197	8.4471	9.0162	8.6027	8.964	8.9215	9.0326	8.6898	8.9952
	119	54422	ENSMUSG00000026805	Barhl1	6.4936	6.0841	6.0047	5.261	6.2465	5.3506	5.5312	6.7932	6.1298	6.0533	6.3139	5.4646	5.706	6.3801	6.1591	5.9658	3.0185	2.4868	3.6809	2	2	3.5274	3.5192	2	2.7876	2	2	2	2.8147	2	2	5.5442	2	2.3228	2.6623	2.3413	2.247	2	2.6102	2	2	2.2765	2	2	2
	120	13803	ENSMUSG00000041773	Enc1	11.972	11.8815	11.7454	11.9188	12.0657	11.9997	11.7511	11.7944	11.6542	11.7832	11.8967	11.9361	11.873	11.9042	11.8756	11.7965	14.1402	14.2215	14.1591	14.1714	13.9833	13.6882	14.2116	13.9884	14.0307	13.5852	14.6041	14.0234	14.1059	14.0563	13.7954	14.0361	14.276	14.283	14.2565	14.3585	14.2433	14.1124	14.4097	14.218	13.9973	14.2985	14.1792	14.1591	14.3281
	121	56460	ENSMUSG00000054065	Pkp3	2	2.6416	3.8109	2	2.9608	2	2.9928	3.178	2.5092	2.9157	2.368	2.487	2	2.6376	2	3.0319	2	2	2	2.8446	2.3998	2	2	4.0992	3.2942	2	4.3386	2.6972	2	2	2	5.0588	3.4807	2	2	3.5202	3.2062	2.8333	2	2	2.38	3.1812	2.7784	3.4222	3.5195
	122	226359	ENSMUSG00000036907	C1ql2	8.7324	8.5838	8.4382	8.3159	8.7371	8.6825	8.6487	8.7108	8.0203	8.401	8.4812	8.2497	8.1568	8.2129	8.0073	8.1496	7.68	5.7909	6.8915	6.3851	6.0009	6.598	6.9302	6.2938	6.3904	7.078	5.4543	6.946	6.4426	6.7297	6.3423	10.9654	11.0274	10.915	10.7855	10.8979	10.6873	10.5139	11.2176	11.0228	10.9933	11.1807	10.632	10.35	11.1876
	123	26423	ENSMUSG00000026751	Nr5a1	8.5579	7.9937	8.0263	8.6016	7.7548	8.5072	8.355	7.0712	7.4787	8.0766	8.1386	7.9172	8.2889	7.9573	7.7416	7.8168	2	2	2	2	2	2	2	4.0992	2	2	2	2	2.3254	3.358	3.6121	3.078	2.2176	2	2	2	2	3.2035	2	2	2.38	2	2.5625	2	2
	124	18013	ENSMUSG00000038255	Neurod2	6.1936	5.275	4.3138	5.7211	5.5123	5.984	5.2096	5.6524	5.1765	5.4501	5.4436	5.3556	5.6322	5.1036	5.4832	4.7907	10.8104	10.3666	10.2324	10.5676	10.1511	10.0863	10.4802	10.3819	10.3836	10.1967	10.7146	10.3486	10.5803	10.524	10.3521	11.914	11.8466	11.9259	12.0245	11.8482	11.925	11.573	11.9162	12.0019	11.8787	12.1067	11.8496	11.5766	12.1824
	125	11550	ENSMUSG00000027335	Adra1d	2.6568	4.5261	3.9733	3.254	4.2587	5.8369	3.5754	2.5068	4.3874	4.8491	4.4219	4.7273	3.3942	3.8454	4.7501	4.5546	7.1373	7.4835	7.0232	7.665	6.3105	7.1756	7.128	6.4283	7.2901	7.3934	7.4405	7.0845	8.2505	7.5581	7.3883	10.3965	10.3842	10.5435	10.7836	10.6025	10.8028	10.3543	10.6861	10.7366	10.5389	10.8258	10.4958	10.6906	10.752
	126	240055	ENSMUSG00000034413	Neurl1b	7.8311	8.2434	7.8753	7.7962	8.4963	7.9016	8.3137	7.6748	7.928	8.0536	8.0273	8.0973	7.8168	8.0927	8.3657	7.9848	11.1966	10.8445	10.767	10.9273	10.9927	10.8661	11.0374	10.6083	10.6701	10.906	10.5694	10.9265	10.9493	11.0209	10.7743	10.075	10.1652	10.1818	10.5434	10.1309	10.3336	9.9874	10.3904	10.3707	10.3019	10.1233	10.0532	10.3606	10.3163
	127	11922	ENSMUSG00000037984	Neurod6	5.5562	4.84	4.9032	6.2691	4.519	4.8347	5.0463	5.1353	4.9184	5.1665	5.0968	4.637	5.3848	5.2229	5.0001	4.9936	7.9351	8.8601	7.867	8.4552	8.4467	8.4631	7.9593	7.8149	8.4971	7.5898	8.7248	8.2396	9.017	8.4935	8.3754	11.5784	11.7726	11.7816	11.7628	11.8126	11.5556	11.7068	11.7373	11.6017	11.4339	11.7909	11.8777	11.6346	11.6327
	128	21907	ENSMUSG00000019803	Nr2e1	6.3649	7.225	7.8855	7.3826	7.0521	7.1183	7.3318	7.5312	7.2002	7.4909	7.2553	7.4047	7.4047	7.1925	7.1701	7.1344	8.4683	8.4275	8.9422	8.4087	8.5238	8.7756	8.8806	8.6918	8.4196	8.9553	8.1214	8.6587	8.4432	8.3898	8.7019	8.2996	8.2335	8.3486	8.3086	7.9632	8.1618	8.2339	8.1339	8.2868	8.1169	7.9848	8.2542	8.2637	8.1984
	129	50722	ENSMUSG00000030792	Dkkl1	4.6739	4.3785	3.4181	3.4125	2.3956	3.3411	3.864	4.4381	3.1825	3.5609	3.8541	3.5887	3.2034	3.7691	3.1845	3.4548	7.8263	8.4738	6.9515	8.0927	7.8381	6.0334	7.985	6.5344	8.1514	7.2665	7.9936	7.8774	8.0776	7.398	7.5234	3.7842	3.85	3.8105	3.1145	4.2439	3.6109	4.9589	4.5205	4.8386	4.4646	4.264	2.5625	3.8155	3.7769
	130	170677	ENSMUSG00000021803	Cdhr1	4.6739	6.1538	6.0957	6.4446	6.1977	5.984	6.4457	6.6311	6.524	6.2273	6.086	6.6493	6.3605	5.9495	6.0799	5.6428	8.2969	9.0468	8.224	8.4421	8.3652	7.459	8.8056	8.543	8.7516	7.7374	8.3733	8.6409	8.2166	8.1932	7.8536	7.2688	7.301	7.0917	7.2367	7.5269	7.408	7.1977	7.3671	7.3052	7.1559	7.4064	6.6346	7.3175	7.1887
	131	20537	ENSMUSG00000011034	Slc5a1	2	2	2	2	2	2	2	2	2	2	2	2	2	2.4547	2.3986	4.0475	3.2436	2.4868	2	2	2	3.1732	2.8045	2	2	3.5293	2.7973	2	2	2	2	4.8073	2.5738	2.5864	2.979	3.3793	3.9265	3.6251	3.2117	3.5574	3.6366	3.5368	4.0353	3.8639	3.3182
	132	74020	ENSMUSG00000032564	Cpne4	9.4759	9.0295	8.9702	8.9476	8.3863	8.9973	8.9322	9.0661	9.0763	8.9914	9.2572	9.1162	9.3846	9.1458	9.3541	9.0996	10.5681	10.8369	10.4931	10.6471	10.5032	10.2558	10.8318	10.6042	10.5183	10.4297	10.981	10.4025	10.7869	10.4312	10.4688	10.741	11.0507	11.3531	11.2375	11.2469	11.0551	11.0959	11.1781	11.0074	10.4865	11.1896	11.2495	11.0807	11.2046
	133	229672	ENSMUSG00000044165	Bcl2l15	3.2298	3.2631	2.8767	2	3.1775	3.6062	2.7312	3.3063	3.8235	4.0051	3.9657	3.7695	3.3942	3.603	4.6802	3.0319	3.2436	3.5881	3.9398	3.1334	2	3.6764	2	4.6948	3.2942	3.9372	2.7973	3.1652	3.5964	3.8502	3.3464	6.0684	4.4319	4.3254	3.6491	3.7087	3.7773	3.4978	3.367	4.7017	3.3258	4.1991	3.5396	3.6599	4.2988
	134	76843	ENSMUSG00000037474	Dtl	2.4693	3.0841	3.3006	2.3528	2	3.6062	2.7312	2	2.8848	3.0453	3.1126	2.487	3.3942	2.4547	3.1845	3.0319	7.6508	8.2789	7.8033	8.0758	7.9616	7.6514	8.6852	8.5044	7.4181	7.8943	8.2388	8.0429	8.2409	8.2237	8.2199	4.6629	5.4928	5.2893	4.5497	5.2338	5.0502	6.3422	4.8713	5.9307	5.7714	4.9164	4.8947	5.5007	4.2988
	135	21334	ENSMUSG00000025400	Tac2	9.2394	9.3349	9.4541	9.0109	9.4857	9.0259	9.2241	9.1793	9.3212	9.1814	9.0639	8.7417	9.1097	9.121	8.7194	9.107	8.3703	7.5714	8.0079	7.6763	8.1023	7.7969	7.7847	7.4497	7.513	8.1263	7.365	8.2689	7.3655	7.6583	7.5072	5.5165	5.4288	5.5586	5.1323	5.9461	5.8149	5.863	5.8238	5.4646	5.5294	5.3934	4.3371	5.6322	5.2328
	136	207667	ENSMUSG00000022245	Skor1	3.1065	5.0976	3.8944	4.7093	3.8171	5.1982	4.7248	4.7403	3.4292	4.1846	3.7332	3.7695	4.2952	4.3953	3.8261	2.4311	2.7518	2.8501	2	3.1334	2.7126	3.8115	3.6959	3.2441	3.8245	5.6228	2.7973	4.1432	3.9195	3.625	3.7286	5.4882	2.4067	3.4622	3.1145	2.7375	3.0844	3.3581	2.8397	2	2	3.4277	2.9661	2	2.2469
	137	13797	ENSMUSG00000043969	Emx2	5.381	4.84	5.8459	4.5132	4.6697	5.5526	5.6113	5.9755	5.5854	4.7385	5.3231	5.4646	5.0859	5.4599	5.0564	5.4723	7.8521	7.9634	7.5258	7.6537	8.4201	7.9066	7.8327	7.923	7.6019	7.9504	6.8599	7.7582	7.579	7.5661	7.8727	8.4168	8.2856	8.388	8.6019	8.4175	8.0924	8.2782	8.5613	8.5287	8.2991	8.3412	8.3998	8.241	8.444
	138	21823	ENSMUSG00000000214	Th	9.5795	9.9393	9.5808	9.9754	9.7282	9.6015	10.4049	9.9249	10.27	9.795	10.3301	9.7267	10.0959	10.1501	9.7535	9.6198	3.6096	4.2053	4.7384	5.0977	4.885	5.8572	4.8769	4.4276	6.487	6.8842	5.1288	5.9921	6.0385	4.9587	5.5288	5.1338	4.2463	4.958	2.8293	4.0714	4.5031	3.0302	3.8608	3.3892	4.2066	3.8219	4.528	4.2387	4.0613
	139	278795	ENSMUSG00000090291	Lrrc10b	7.1614	6.8719	7.248	4.7093	7.5072	7.097	6.7935	6.2712	6.4973	6.5879	6.2711	6.1263	6.7048	6.1734	6.6361	6.3077	8.2969	8.7675	7.8275	7.885	8.4832	7.7131	7.7248	8.1788	8.8728	9.5179	7.2989	7.9589	8.5483	7.4591	7.4146	10.4387	10.56	10.5513	10.5123	10.4076	10.5286	10.1404	10.6364	10.5939	10.5849	10.6699	10.5791	10.161	10.6538
	140	26558	ENSMUSG00000003573	Homer3	6.4307	6.5993	6.2777	4.9864	6.908	6.3156	6.3786	6.4485	6.2308	6.3825	6.1105	6.2533	5.9383	6.4428	6.1591	6.2561	6.1502	6.8822	6.6412	7.1219	5.9718	7.3742	6.9478	7.1715	6.6207	7.1177	6.3085	6.9166	6.2831	6.5164	6.8204	10.063	9.5464	9.6996	9.5696	9.5191	9.6539	9.2591	9.6111	9.588	8.943	9.835	9.6287	9.5752	10.0313
	141	64378	ENSMUSG00000068696	Gpr88	8.7556	8.5583	8.7885	8.6016	8.7499	9.0088	9.0374	8.7366	8.582	8.7842	8.9328	9.0123	9.2398	8.7005	8.7874	8.7111	10.1966	10.7292	10.2156	9.98	10.5604	9.8119	10.5277	10.0297	10.7766	11.2394	10.5468	10.4118	10.9104	10.3847	10.4154	7.2351	7.2525	7.4389	6.9317	7.6277	6.7224	7.8136	7.0027	7.4618	7.673	6.9245	7.0933	7.3476	5.6524
	142	104245	ENSMUSG00000039728	Slc6a5	2	2	2	3.8044	2	2	2.7312	2	2.5092	3.0453	3.1126	2	2	2	2	2.4311	2	2	2.9602	2	2	2	2	2	2	2	2	2	3.1795	2	2	4.7607	2	3.0022	2	2	2	2.3341	2.3371	2	2	2.7083	2	2	2
	143	15013	ENSMUSG00000091705	H2-Q2	8.8355	8.7126	8.1247	8.5343	8.3421	8.2888	8.4287	8.0358	7.923	8.1504	8.0143	8.2648	8.1436	8.1313	8.0425	7.8864	6.5163	3.7688	5.0983	5.6935	3.9539	6.2391	4.8017	5.1151	4.5161	5.7547	5.7197	5.4517	5.4078	5.5781	5.429	2.7369	2.7236	2.5864	2	3.2231	2.4579	2.6052	3.2117	2.4047	2.38	3.1812	3.6533	2.3103	2.2469
	144	320265	ENSMUSG00000059187	Fam19a1	8.0053	7.8258	8.1204	7.8526	7.527	7.6605	8.0156	7.9051	8.1246	7.954	7.9615	8.3454	8.4905	8.3205	8.2377	8.5435	10.1277	10.2705	10.2369	10.2714	9.8849	9.7354	9.9505	10.3961	9.7787	9.486	10.5917	9.7631	10.1782	10.16	10.2314	9.7073	9.9108	9.9247	10.0922	9.9598	9.6579	9.8893	10.0782	9.8103	9.7955	9.9761	10.0389	9.8016	9.8886
	145	21333	ENSMUSG00000061762	Tac1	10.1571	10.4496	10.3638	10.5977	10.2856	10.4973	10.2834	10.6286	10.581	10.4705	10.4972	10.5533	10.5911	10.6299	10.4397	10.8421	9.1693	8.799	9.0422	8.9629	9.2932	9.4051	8.6904	8.0713	8.9969	9.7458	8.5081	8.9653	9.0992	9.0191	9.6384	7.3417	7.1766	7.9701	7.6252	7.6394	7.631	7.4071	7.1055	7.2933	7.8791	7.4833	7.4248	7.5159	7.2677
	146	12891	ENSMUSG00000022212	Cpne6	11.1171	11.0976	10.9586	10.8764	10.8922	11.0707	10.8353	10.9945	10.8355	10.8649	10.7778	10.7532	10.8493	10.7035	10.7243	10.8905	12.4046	12.3155	12.4471	12.5064	12.2647	12.119	12.2457	12.3659	12.4937	12.0089	12.7446	12.3914	12.2441	12.577	12.4063	13.0587	13.2374	13.1597	13.3052	13.194	13.2974	13.1154	13.2395	13.2014	13.1477	13.3627	13.0134	13.2459	13.3654
	147	111970			4.7583	5.433	5.6436	6.4074	6.3617	5.9366	5.7593	4.4931	5.8197	5.5841	5.7851	5.9871	5.3848	6.0005	5.4832	5.9658	7.9982	8.1131	7.8592	7.8654	8.3652	8.0972	8.2485	8.526	7.9711	7.9938	7.6458	8.1158	7.785	7.8067	7.8727	7.8158	8.0857	8.0704	8.2361	8.0471	7.9602	7.6953	7.7524	7.944	7.8865	7.8851	7.8514	8.1874	7.7752
	148	27359	ENSMUSG00000031255	Sytl4	9.7412	9.8941	10.1919	9.6766	9.8337	9.8834	10.3534	9.9398	9.9178	9.9175	10.1156	10.0533	10.1399	10.0608	9.8462	10.1485	5.9413	6.0918	6.4254	6.2708	6.5057	6.0334	6.1536	3.0669	5.2802	6.2775	4.8623	5.905	5.8233	5.4804	6.2281	4.9385	5.5135	6.0041	5.1948	5.3889	5.5646	5.8369	5.0191	5.3774	5.7392	4.9164	5.492	5.9106	5.3431
	149	100504399			8.3009	8.4516	7.5861	8.0035	8.3589	7.9971	8.3781	8.5516	8.5068	8.2844	8.3279	8.139	8.4209	8.3762	8.1819	8.5272	2	3.5881	2	3.5799	2.3998	2	2	5.0688	2	2.9585	3.075	3.1652	2.8147	2	2.8249	2.5305	2	2.5864	2.8293	2.1807	3.2062	2.8333	2	2.4047	2	2	2	3.8155	2.6416
	150	110895	ENSMUSG00000026065	Slc9a4	2	2	2	2	2	2	2	2	2	2	2.661	2	2	2.4547	2	2	5.2553	5.1741	5.954	4.9569	4.0682	4.863	5.0816	2	4.8426	4.1048	5.5483	4.9699	4.5993	5.7274	4.9421	7.7871	8.5339	8.578	8.7498	8.3717	8.6835	8.6628	8.4871	8.4824	8.2428	8.5079	8.132	8.4924	8.531
	151	76982	ENSMUSG00000067879	3110035E14Rik	8.6381	8.6657	9.0152	8.4816	8.6492	8.9858	9.0192	8.8801	8.9212	8.7655	8.8661	9.0609	9.0257	9.2122	8.8525	9.0011	11.9215	12.0705	11.899	11.9631	11.9289	11.959	11.7729	11.8225	11.6132	11.4937	12.1532	11.8532	12.3371	12.0104	12.0663	12.4665	12.5936	12.495	12.6876	12.6055	12.5705	12.6062	12.4639	12.6612	12.781	12.5241	12.3991	12.616	12.2197
	152	20476	ENSMUSG00000021099	Six6	7.751	7.7751	7.3697	7.7524	6.9528	7.7177	7.7318	7.5765	7.6526	7.847	7.4786	7.9551	8.2647	8.0449	7.7416	7.2312	2	2	2	2	2	2	2	4.9202	2	2	3.075	2	2.3254	2	2	2.2895	2	2	2.979	2.3413	2	3.2035	2	2	2	2	2.7784	2.1635	2
	153	18610	ENSMUSG00000027400	Pdyn	9.0369	9.1338	8.7413	9.1692	9.1043	8.8129	9.2895	9.1709	8.7866	8.8915	9.0826	8.6523	9.1566	8.7974	8.5824	8.8173	7.0053	7.8068	7.2788	7.5349	7.6213	7.3411	7.4934	7.1494	8.2021	8.5712	7.2989	7.6192	7.675	7.389	7.1993	7.1654	6.7575	6.4799	6.5201	6.8392	6.6275	6.3968	6.9667	7.0751	6.798	6.9835	6.9223	6.4593	7.309
	154	14419	ENSMUSG00000024907	Gal	9.039	9.3865	9.5965	8.8643	9.6624	9.166	9.4506	8.8981	8.736	9.1366	9.0888	8.8461	8.963	9.0072	8.7281	8.7813	2	4.4368	5.342	5.0977	4.2727	5.0385	3.6959	4.0992	4.7676	4.4543	4.5351	5.026	3.4704	3.8502	5.3218	3.4739	3.85	4.463	3.2385	3.048	3.4227	3.0302	2.8397	2.7205	2.38	3.8219	2.9661	3.2868	3.0842
	155	80906	ENSMUSG00000025221	Kcnip2	8.0478	7.7071	7.8015	7.8176	7.6769	8.1811	7.5709	7.2731	7.5843	7.6623	7.3197	7.5965	7.7221	7.6358	7.7416	7.7342	10.1224	9.4917	9.9252	9.3968	9.6642	9.898	9.5859	9.3024	9.5093	9.7941	9.6976	9.6846	9.8017	9.8374	9.6985	10.3442	10.3679	10.3586	10.5245	10.4768	10.4156	10.2383	10.5468	10.4193	10.2557	10.5408	10.1772	10.448	10.6158
	156	20199	ENSMUSG00000001023	S100a5	2	2.6416	2.2739	2	2	3.016	4.6509	2	2.2769	2	3.456	3.1406	2	2	2	2	2	4.0739	2.3953	2	2	3.1732	2	4.9202	2	2	3.075	2	3.0086	2	2	2.9175	2.7236	3.5879	2.4734	2	2	2	2.6102	2	2	2	3.1322	2	2
	157	17919	ENSMUSG00000025885	Myo5b	8.5191	7.7824	8.7328	8.4636	7.9441	8.3443	8.5757	8.9032	8.7783	8.6808	8.0013	8.3383	8.7083	8.3858	8.3319	8.4773	10.9296	10.6904	10.9482	10.8056	10.8828	10.4688	10.9267	10.7117	10.7144	10.4667	11.1573	10.767	10.6983	10.752	10.561	11.0824	11.3507	11.284	11.4682	11.1301	11.4063	11.0786	11.3066	11.145	10.7952	11.3411	10.9807	11.2443	11.4263
	158	21828	ENSMUSG00000021702	Thbs4	5.0868	4.4542	5.5945	4.0168	4.5963	5.8369	4.9261	5.1003	4.4996	5.0478	4.9418	4.4376	4.9096	4.9038	4.17	4.9291	7.5063	6.9587	7.4756	6.5163	7.4421	7.1116	5.1439	7.7132	5.6576	8.1836	5.9437	7.0845	7.5246	7.3248	7.8211	8.9734	9.1381	8.8467	8.7731	8.6557	9.0798	9.1038	9.1692	9.3737	9.5014	8.8572	9.2057	9.1786	9.3408
	159	109593	ENSMUSG00000030226	Lmo3	9.1525	9.3719	9.421	9.3997	9.3444	9.5708	9.6344	9.1582	9.2903	9.1831	9.6401	9.5182	9.6878	9.5905	9.4517	9.5731	11.6373	11.8851	11.5456	11.6688	11.9175	11.0422	12.0397	11.6781	11.7472	11.4757	12.3295	11.6994	11.5524	11.7959	11.2197	10.9538	11.1939	11.133	11.1366	11.0851	10.9626	10.9808	11.0385	11.0219	11.21	11.0677	10.9588	10.9216	10.9588
	160	545279	ENSMUSG00000067571	Ms4a15	2	2	2.2739	2	2.9608	2	2	2	2	2	2	2	2	2	2	2	2	2	2.9602	2.4833	2	2	2	2	2	2	2	2.3903	2.3254	2	2	2.7369	2.2176	2	2	2	2	2.3341	2	2	2	2	3.4162	2	2.4577
	161	14599	ENSMUSG00000020713	Gh	3.9572	8.6537	2	2	5.8005	2.5956	9.149	2.2755	2.8848	2.2355	3.8541	2.487	2	3.6884	9.5283	5.7587	2	2	7.4022	4.1957	2	6.0055	3.084	9.6479	2	2	2	2	2	5.7274	4.0305	5.5715	6.0415	2	2.4734	2.7375	4.1249	7.688	2	2	2.38	2	2	2	2.6416
	162	56742	ENSMUSG00000068744	Psrc1	3.2298	2.6416	2.8767	2	2.7057	3.3411	2.9928	2.5068	3.3111	2.9157	3.1126	2.487	3.8502	3.603	3.1845	2.4311	7.5491	6.5529	7.2067	6.439	6.3105	6.9886	6.8202	6.9208	6.0225	6.4114	6.9314	6.1006	6.8869	7.3154	6.4981	7.6849	7.7438	7.4137	7.841	7.7651	7.631	7.3062	7.7594	7.7492	7.8188	7.6565	7.4487	7.6632	7.6681
	163	18976	ENSMUSG00000020660	Pomc	10.3091	10.6639	9.9278	10.4649	10.67	10.0951	10.8601	10.5842	10.5455	10.7031	10.3648	10.0357	10.652	10.1937	10.3706	10.2723	5.493	4.4368	6.7965	5.6935	4.4518	7.5679	5.5638	7.5874	6.146	5.1345	4.8623	5.026	5.1852	5.7831	4.3544	5.205	6.0127	4.0908	4.5968	4.8887	5.6952	7.9896	4.5852	5.0787	4.8128	4.3261	4.4036	4.678	4.5494
	164	18012	ENSMUSG00000034701	Neurod1	5.7947	6.1538	5.6911	5.9709	5.5123	6.6155	5.2601	5.9164	5.8831	5.8015	5.6245	6.3128	6.4055	6.1129	6.0799	5.866	8.3218	7.897	8.0497	8.05	7.6491	8.4268	8.0019	7.8219	7.6339	7.3186	8.4238	7.7829	8.083	7.7727	7.9527	9.7994	9.0906	9.0433	8.8333	8.999	8.7675	8.9572	8.8517	8.8414	8.6928	9.112	8.7649	8.8913	8.8672
	165	209268	ENSMUSG00000031111	Igsf1	11.2465	11.2586	11.2287	11.2191	11.2597	11.1802	11.3629	11.4181	11.2325	11.1703	11.3068	11.0538	11.2193	11.1903	11.0616	11.0732	8.4287	7.5344	8.7528	8.5129	8.6622	9.0184	8.7467	8.319	8.7172	9.3042	8.4545	8.3861	8.0112	8.3162	8.9074	7.0049	6.8337	6.9231	7.0033	7.0398	7.1056	7.1771	7.2522	7.0041	6.5421	7.0121	7.8633	7.2417	6.8488
	166	23985	ENSMUSG00000020651	Slc26a4	2	2.6416	3.0323	3.0759	3.6818	4.8347	2.4115	3.8178	3.8235	3.6451	4.1658	3.382	3.8502	3.8454	3.6904	3.0319	6.2047	6.3967	6.5471	6.2708	5.7154	6.6349	6.2129	6.3138	6.7818	6.3121	6.5994	6.6572	6.2831	6.7155	6.4136	8.3516	8.6785	8.659	8.8035	8.6614	8.5403	8.4254	8.6358	8.5587	8.3848	8.5734	8.6429	8.5285	8.6698
	167	107656	ENSMUSG00000051617	Krt9	4.8763	4.84	4.1193	4.0168	4.8697	4.9345	4.795	3.729	4.6531	4.7385	4.9418	4.8122	4.5571	4.9038	4.2686	3.4548	8.4458	8.414	8.71	8.6621	8.3427	8.9021	8.0836	8.593	8.1141	8.4788	8.6579	8.5191	8.5405	8.8567	8.6061	7.5815	7.2151	7.5665	7.1837	7.2517	7.0001	7.6659	7.7022	7.574	7.5578	7.7892	6.7541	7.1569	7.4877
	168	73707	ENSMUSG00000055523	Gucy2g	2	2.3562	2.504	2	2.9608	4.3474	2.9928	4.3215	2.2769	2.4379	2.9044	3.1406	3.2034	2	2	3.0319	7.4052	8.062	6.7466	7.6875	7.0555	6.8852	7.673	7.1156	7.3934	7.1753	7.3906	7.6192	7.7784	7.371	7.4059	6.2812	6.4272	6.5741	6.0644	6.3844	6.1239	5.9138	6.3926	6.4197	6.5234	6.2448	5.8668	6.1826	7.0328
	169	243967	ENSMUSG00000070564	Ntn5	3.547	2.3562	3.3006	2	2	3.3411	2	3.9805	2.5092	2.2355	2.368	2	3.7136	2.9458	3.3735	3.6273	5.6584	5.9112	5.4706	5.6019	4.6111	5.8572	5.5638	6.1677	5.7383	5.0952	4.5351	5.4102	6.206	6.1004	4.3544	7.1831	7.2525	7.3441	7.3849	7.3913	7.2256	7.1242	7.2422	7.3744	7.3063	7.5884	6.2747	7.0408	7.2536
	170	225870	ENSMUSG00000024883	Rin1	6.6003	6.7571	6.6582	7.074	6.5867	7.5068	6.6301	6.6911	6.6631	6.2273	6.8957	6.8634	6.5728	6.6054	6.3513	6.4976	11.0292	10.6778	10.6832	10.557	10.6061	10.6317	10.5779	10.6551	10.3977	10.5389	10.6825	10.5711	10.6798	10.7763	10.5805	10.6248	10.7844	10.8554	10.8026	10.8174	10.8849	10.7017	10.8999	10.7797	10.8528	10.8405	10.694	10.8574	10.8804
	171	235281	ENSMUSG00000049281	Scn3b	10.8592	11.1261	11.2516	11.2917	10.9732	11.0458	11.1063	10.9754	11.1174	11.152	11.173	11.2483	11.2066	11.1714	11.3118	11.3045	11.7128	11.7485	11.6082	11.6532	11.512	11.3215	11.7266	11.7569	11.5106	11.3289	11.9439	11.6025	11.4812	11.6054	11.5816	12.2705	12.3666	12.3406	12.4008	12.6451	12.329	12.23	12.6674	12.4247	12.2793	12.5605	12.2172	12.3249	12.5114
	172	244310	ENSMUSG00000047495	Dlgap2	8.1134	8.2327	8.3223	8.0881	8.5984	8.3443	7.9245	8.369	8.2502	7.9907	8.0963	8.2033	7.9968	8.29	8.1563	7.9528	10.4045	10.5352	10.2354	10.3684	10.2723	9.9773	10.6574	10.4193	10.1361	10.1254	10.5624	10.2996	10.3724	10.0831	10.3025	10.0327	10.2	10.2028	10.1237	10.264	10.2921	10.217	10.2123	10.3205	9.8957	10.0084	10.0031	10.1909	10.1864
	173	19225	ENSMUSG00000032487	Ptgs2	5.3541	3.8156	3.9733	4.7691	2.3956	4.6115	3.2142	4.8284	4.3874	3.6451	3.7332	4.4376	4.3879	4.4452	4.5294	3.9206	8.3583	8.9978	8.5249	8.5745	8.5731	7.9291	8.999	8.9627	8.3248	7.5322	8.4665	8.7941	8.5639	8.2535	8.6658	8.5899	9.2626	9.4222	9.1378	9.0923	8.7847	9.0928	9.0766	8.9398	8.4755	9.319	9.3476	8.8781	9.1049
	174	212712	ENSMUSG00000038331	Satb2	5.5796	5.6416	5.8034	6.1838	5.4302	6.0298	4.9261	5.9561	5.3954	5.7453	5.2806	5.614	5.8433	5.4599	4.7501	5.3788	7.2838	7.897	6.9949	7.9327	6.6225	7.1881	6.2416	7.9552	6.7432	7.098	6.6427	6.989	8.5677	7.6508	7.5315	8.1853	8.2826	8.0156	8.0286	8.253	7.9383	8.2587	7.7311	8.0535	8.4208	7.7726	8.4518	7.9781	7.7948
	175	14765	ENSMUSG00000056380	Gpr50	8.3561	8.554	8.5836	8.1956	8.5458	8.326	8.7362	8.2819	8.1158	8.4834	7.6132	7.7974	8.11	7.864	7.8961	7.7988	5.0323	3.9294	4.2577	5.029	4.365	3.8115	5.8886	4.8119	4.2114	4.9265	3.3078	5.2308	3.1795	4.8586	4.6188	2.7369	2.7236	4.3254	2.2561	3.1382	3.3185	3.0302	2.8397	2.9793	2.929	2.2765	4.4036	3.2141	3.4223
	176	19260	ENSMUSG00000027843	Ptpn22	4.4887	4.7225	3.8109	2	3.1775	2.5956	2.7312	2.5068	3.9864	3.4714	2.9044	4.2061	4.475	3.987	2.9669	3.9206	3.6096	3.7688	4.3497	3.9204	4.7546	4.2525	2	5.16	2.7876	2	2.453	3.8013	3.5964	3.9508	3.6121	6.1061	3.4807	4.2514	3.8949	4.0248	2.9514	5.3759	3.9617	3.708	3.8922	4.0598	4.4036	3.9999	4.1849
	177	18216	ENSMUSG00000027568	Ntsr1	8.8331	8.8763	8.73	9.101	8.8361	8.6239	8.8561	9.0224	8.8906	8.8072	8.848	8.5875	8.5317	8.778	8.6387	8.9205	8.2262	7.9353	8.2895	7.988	7.8857	8.4631	7.985	7.6905	8.144	8.0411	8.1214	8.1603	7.5866	8.1194	7.879	6.5915	6.5426	6.5588	6.6261	6.7418	6.3652	6.432	6.2602	6.9746	6.8591	6.5612	6.4103	6.7311	6.044
	178	105853	ENSMUSG00000024479	Mal2	10.2818	10.2019	10.278	10.1516	10.1766	10.4411	10.1081	10.4113	10.4761	10.237	10.5156	10.7639	10.5801	10.5672	10.6474	10.6238	11.0628	11.189	11.3294	11.1335	11.0399	11.0668	11.0405	11.3595	10.7885	10.7977	11.3709	10.8431	11.2822	11.0559	11.095	11.45	11.7367	11.6974	11.7826	11.7427	11.5892	11.8283	11.5367	11.6612	11.9215	11.6606	11.4909	11.7992	11.3978
	179	329160			4.6739	4.4542	3.6279	2.636	3.6818	4.6115	3.4061	4.785	3.5383	4.0674	3.9657	4.2061	4.9096	3.3115	3.1845	4.5546	5.8416	6.369	5.0983	6.3003	4.0682	6.2629	4.454	5.9549	5.6155	4.6834	5.2457	5.5697	7.6018	5.6988	6.1256	6.6692	6.8582	6.7047	6.1926	6.6451	5.8712	6.2855	6.5629	6.8178	7.2617	6.5086	6.9559	6.8257	6.044
	180	16874	ENSMUSG00000026890	Lhx6	6.0997	6.696	7.1664	6.5844	7.4248	6.985	6.5306	6.9189	6.7451	6.3198	6.6837	7.2909	6.2659	6.7315	6.9352	7.0152	9.0991	8.87	9.3626	8.9721	8.8929	8.8754	8.8715	8.7553	9.203	9.5885	9.197	8.8841	8.7984	9.045	9.0317	8.3633	8.5314	8.7525	8.5609	8.5792	8.7526	8.5062	8.1607	8.6406	8.4998	8.4774	7.9437	8.5563	8.5853
	181	19293	ENSMUSG00000005716	Pvalb	8.258	7.5607	7.8906	6.9373	7.9293	7.4573	7.8355	7.9935	8.0529	8.0536	7.9615	7.8283	8.0616	7.9225	7.4581	7.8864	7.0357	7.3337	7.5454	7.3781	7.0133	7.2004	7.4447	7.6119	7.6653	7.8771	7.5694	7.0444	7.5714	7.3342	7.5234	10.5507	9.2914	8.9902	8.9647	9.1639	9.2273	9.2468	8.9836	9.088	9.3497	9.1618	9.3665	8.9015	9.1435
	182	73040			9.772	9.62	10.1232	9.9834	9.9797	9.7799	9.9026	9.8505	10.3376	10.2361	10.4808	10.6415	10.3873	10.5279	10.3327	10.5195	11.1669	10.9442	11.2284	10.6936	11.3674	11.2415	11.0628	10.9468	10.4807	11.1762	10.4205	10.9219	10.7594	10.5543	11.0113	10.0291	10.1496	10.0839	10.232	9.6855	9.7842	10.0861	9.7214	10.2774	10.2109	9.727	10.2354	10.1939	9.7149
	183	16681	ENSMUSG00000064201	Krt2	2	2.3562	2.504	2	2	4.1947	2	2.2755	2	2.4379	2.661	3.382	2	2.4547	3.1845	2	7.5385	5.7485	8.022	6.6595	5.4034	7.687	6.701	6.568	3.4934	6.7767	4.4402	6.6923	5.874	6.9155	7.3249	7.373	7.1237	7.0595	7.3021	7.4095	7.1818	7.1666	7.1702	7.4724	6.8591	7.3847	6.8286	7.462	7.4075
	184	27140	ENSMUSG00000040610	Tlx3	2	2	2	2	2	2	2	2	2	2	2	2	2	2	2	2	2	3.3814	2	2	2	2	2	2	2	2	2	2	2	2	2	2.2895	2	2	2	2	2	2	2	2	2	2.5085	2.3085	2	2
	185	27762	ENSMUSG00000007030	Vwa7	4.0269	2.8797	3.8944	3.254	2	4.4855	4.7248	2	3.9073	3.7246	4.1658	2.8505	2.7237	3.603	3.9501	2.7625	2.4243	2.8501	3.8162	2	2.7126	3.8115	3.8532	3.0669	3.4934	4.0234	2	2.3903	2	3.4976	2.8249	5.6502	3.3018	3.4622	2.8293	3.1382	2.9514	2	2.6102	2	3.4895	2.5085	3.6533	3.6599	3.8535
	186	53313			8.2176	7.3089	7.6171	7.3536	7.5756	7.6459	7.045	7.8587	7.0608	7.2022	7.1647	7.4974	7.012	7.0706	7.6892	7.4191	8.0586	7.9258	7.928	8.1903	8.1743	8.4373	7.3155	8.3913	8.6768	7.7564	7.6244	8.0429	7.8306	8.358	8.0843	9.4944	7.735	6.8622	7.7913	7.4453	7.6739	7.3893	7.4989	7.4512	7.3813	7.4489	7.8395	6.8678	7.625
	187	223726	ENSMUSG00000041708	Mpped1	9.4649	9.5847	9.5425	9.2992	9.8397	9.7076	9.6199	9.655	9.4869	9.723	9.4493	9.6189	9.4505	9.5526	9.594	9.6872	11.9205	11.8097	11.4809	11.7423	11.7419	11.4903	11.6589	11.7124	11.494	11.4535	11.5612	11.6859	11.9677	11.6893	11.7832	12.2014	12.2402	12.0644	12.37	12.1248	12.3703	12.1269	12.065	12.4449	12.5561	12.1254	12.0787	12.3709	12.0392
	188	225638	ENSMUSG00000032845	Alpk2	2	3.0841	3.8944	2	4.1603	2.5956	2.7312	2.5068	3.3111	3.2741	2.368	2.487	2.4067	2.7999	2.9669	2	5.2027	2	3.1768	3.3739	4.7546	3.935	2	2	2	5.4468	2	3.8013	3.3322	4.2952	3.1926	5.7004	2.9832	2.8092	2.4734	2.1807	2.247	2.6052	3.5072	2.7205	2.6805	2.7083	3.7587	2.5656	2.4577
	189	228731	ENSMUSG00000054160	Nkx2-4	7.3225	8.0251	7.718	6.2897	7.6946	7.5068	7.5908	7.3791	7.0516	7.167	7.2879	6.9219	7.2893	7.4218	7.1953	6.9354	2	2	2	2	2	2	2	2	2	2	2	2	2	2	2	2	2	2	2	2	2	2	2	2	2	2	2	2	2
	190	330166			12.6323	12.5857	11.7471	12.7623	11.9786	12.5534	12.2395	12.4272	12.3102	12.3327	11.9358	12.1092	12.3068	12.0595	12.0615	11.7253	13.0842	12.6903	12.9827	12.0907	12.6069	13.4662	12.3698	13.1947	12.825	12.3148	12.3989	12.922	12.6394	13.2227	13.23	12.8465	13.2751	13.1543	12.7164	12.8236	12.808	13.1339	12.9796	13.0108	13.3334	12.9263	13.027	13.2853	13.2944
	191	214230	ENSMUSG00000074923	Pak6	9.7896	9.7903	9.5114	9.6024	10.0118	9.7765	9.8744	9.727	9.7147	9.8625	9.5887	9.5245	9.6855	9.6002	9.5032	9.5384	11.5875	11.2185	11.3188	11.3256	11.3025	10.9852	11.4062	11.2008	10.9381	11.33	11.052	11.3325	11.2441	11.2009	11.1112	10.3223	10.3544	10.2956	10.4122	10.2483	10.3973	10.3099	10.2251	10.4028	10.4246	10.2266	10.0376	10.4215	10.2514
	192	78709	ENSMUSG00000050074	Spink8	3.1065	3.4223	3.5268	2	3.6818	4.0239	2.9928	2.706	4.2008	3.8716	3.8541	3.5887	4.3879	3.5122	3.6904	4.3726	5.9088	5.1741	6.6412	4.9569	5.9422	5.6564	5.9938	5.7647	5.5274	5.8985	6.4122	5.9636	5.2633	5.5781	5.4963	8.7652	8.549	8.4137	8.6076	8.7301	8.7146	8.2974	8.8218	8.6639	8.7785	8.9513	8.6702	8.798	8.752
	193	104798			7.4229	7.5946	7.2078	8.123	7.2445	7.675	7.1824	8.1167	7.7692	7.7362	7.0929	7.678	7.5622	7.403	7.7755	7.8778	2	3.5881	4.6686	2.4833	3.1874	2	2	4.4276	3.4934	4.3244	3.5082	2.6972	3.3322	2.8332	3.0204	3.3536	2.7236	2.3228	2	2.3413	2	4.1334	2	2.4047	2.6805	2.7083	3.4162	3.5459	2.9512
	194	77018	ENSMUSG00000058897	Col25a1	11.2972	10.9977	11.2372	11.3909	11.0405	11.2473	11.2407	11.165	11.2472	11.0961	11.211	11.3768	11.3568	11.4553	11.3994	11.0973	10.6782	10.8842	10.9297	10.8622	11.0364	10.7792	11.0699	10.7397	10.9434	10.7824	11.5534	10.9005	10.6474	10.6491	10.6843	10.2001	10.6084	10.6795	10.4655	10.4838	10.4029	10.5374	10.3029	10.4716	10.2811	10.3781	10.3282	10.4861	10.2611
	195	53324	ENSMUSG00000059991	Nptx2	9.9507	9.5398	9.7189	9.7075	9.9114	9.5708	9.7495	9.3877	9.1576	9.4882	9.7018	9.5055	9.6438	9.3756	9.4199	9.4202	11.1865	11.6079	11.0834	11.5006	10.9261	10.0996	11.4322	11.2823	11.3081	10.3359	11.3861	11.441	11.1637	11.0453	11.0759	9.4873	9.5388	9.3531	9.6345	9.4547	9.865	9.4815	9.5001	9.8493	9.5898	9.7667	9.6287	9.2656	9.6016
	196	22771			9.3759	9.441	9.5098	9.271	10.156	9.5977	8.9046	8.416	9.1662	9.0252	9.1667	9.7511	8.829	9.4989	9.7954	8.8394	6.8936	8.4072	7.7108	8.2742	7.1232	8.4268	8.0836	8.2271	8.3443	8.6065	7.1718	8.0564	8.5008	6.9765	7.9941	10.2838	7.5419	7.8747	7.7709	8.253	7.9207	8.2189	7.4124	7.0889	7.7067	7.3021	9.3306	8.2062	7.4389
	197	435145			5.2988	4.8953	4.6384	6.8705	5.9843	2	5.7237	6.0136	5.0715	4.488	4.9953	4.8122	4.9708	5.4599	4.9416	4.9936	5.4025	6.0575	5.3862	6.3291	5.5284	5.6201	5.6521	4.8671	6.8378	7.1564	5.6365	5.9636	6.3382	5.6988	6.2863	6.9848	5.5935	4.5886	4.8509	5.5455	4.8777	5.1404	4.9715	5.2845	4.5413	4.7899	5.492	4.9708	5.0819
	198	15550	ENSMUSG00000021721	Htr1a	8.3994	8.2906	8.6116	8.9953	8.7026	8.4151	8.4669	8.1683	8.4967	8.3455	8.5722	8.4485	8.6298	8.5517	8.4095	8.3962	8.3523	8.3157	8.5639	8.4683	8.6892	8.5086	8.3901	7.87	7.9373	8.7302	8.3604	8.1728	8.4136	8.2731	8.1114	9.5689	9.6564	9.65	9.8587	9.8762	9.6947	9.7721	9.7587	9.9186	9.7818	9.7341	9.5111	9.7478	9.5464
	199	66733	ENSMUSG00000045246	Kcng4	6.2675	7.0653	6.5594	5.6272	6.9962	6.5223	6.4237	6.7259	6.8009	6.777	6.9097	6.5036	6.314	6.5944	6.4172	7.0307	6.308	6.0918	5.5887	6.1139	5.061	6.3762	6.2698	7.081	5.1681	5.8284	5.3538	5.6069	6.1036	5.2627	6.0825	9.5807	7.8165	7.2804	7.6421	7.7615	7.7052	7.4334	7.7239	7.6031	7.6983	7.5821	7.7906	7.5897	7.6196
	200	16372	ENSMUSG00000001504	Irx2	6.8321	6.3449	5.5693	5.5268	6.0128	5.6731	6.5098	5.9947	6.2629	5.9412	6.2711	6.0928	6.4916	6.0335	6.2584	6.3329	2	2.4868	2.3953	3.1334	2.3998	3.5274	2.8045	2	2.4469	2.7718	2.7973	2	3.1795	2.6051	2	3.688	2	2	2	2.9517	2	2	2.6102	2	2.6805	2	3.8569	2	2.8047
	201	246048	ENSMUSG00000022860	Chodl	7.8743	7.7824	8.1462	7.9201	7.8837	7.9738	7.7047	7.6079	8.0847	7.9206	7.835	8.2573	8.2708	8.36	8.3376	8.1914	6.2573	6.0575	6.6043	6.4123	5.9119	6.9743	6.3774	4.004	5.6155	6.2598	6.3351	6.2494	5.1852	6.2853	5.7098	3.078	2.9832	2.5864	3.2385	2.6171	2.8049	3.951	3.2117	3.3892	3.141	2.2765	2	3.2141	2.2469
	202	21336	ENSMUSG00000030043	Tacr1	8.4731	8.3363	8.3741	8.3408	8.4862	8.4323	8.5352	8.108	8.5068	8.4487	8.4718	8.5875	8.4852	8.5517	8.5086	8.291	7.57	7.5591	8.0289	8.2214	8.1355	8.1681	8.6799	7.4765	8.3571	8.4045	8.2598	8.135	7.6462	7.4761	7.9102	4.3846	4.3877	4.958	5.8284	4.8085	5.3436	5.699	4.8713	5.4646	3.8922	4.8333	4.528	5.6322	4.9134
	203	320500	ENSMUSG00000046593	Tmem215	7.0899	6.3248	6.8793	6.1391	6.6961	6.703	6.5712	6.3626	6.3994	6.3198	6.8528	6.626	6.8422	6.3009	6.4596	6.2561	8.2262	8.2789	8.2118	8.2742	7.8934	7.9438	8.4028	8.1734	8.4196	7.9114	9.0031	8.2805	7.9417	7.9894	7.9467	6.4953	6.8822	7.8181	7.5554	7.2916	7.3889	7.218	7.0378	6.914	6.231	7.4697	6.5193	7.6146	7.4201
	204	16373	ENSMUSG00000031734	Irx3	7.266	7.7751	6.3971	6.7716	7.4248	7.3348	7.3668	7.5443	7.2965	7.2634	7.4501	7.2149	7.0691	7.3967	6.9649	7.2577	2	2.8501	4.3497	3.7602	2.9694	4.6631	2.4576	3.0669	3.9653	5.0952	5.3007	3.518	3.3322	3.0301	3.8364	5.3057	3.7833	3.8105	3.2385	3.048	3.8538	2.8333	3.0376	2.4047	3.8922	3.0401	3.7587	4.2016	3.6105
	205	18573	ENSMUSG00000059173	Pde1a	10.2521	10.1825	10.1732	10.3966	9.9189	10.5115	10.0837	10.1186	10.1504	10.1415	10.3482	10.4461	10.3789	10.4793	10.3212	10.5627	11.7939	12.0389	12.0597	11.8858	11.7333	11.7175	11.9135	11.6713	11.6779	11.4608	12.3381	11.8337	12.0953	11.8437	11.6273	11.6776	11.9733	12.2624	12.287	12.0345	12.185	12.1396	11.9087	12.0674	11.9389	11.9736	11.7352	12.1859	11.7649
	206	140781	ENSMUSG00000053093	Myh7	8.3114	8.366	8.4136	7.8664	8.3589	8.4744	8.1288	8.0542	7.8718	8.4369	8.1326	8.1224	8.0403	8.1947	7.9037	7.9848	9.5178	8.6281	9.6201	9.0863	9.4647	9.5352	8.9864	8.9499	8.8274	9.503	8.9906	9.23	9.1386	9.4057	9.1487	6.8356	6.5526	6.4305	7.1287	6.566	7.1966	7.1771	6.2993	7.0041	7.1921	6.7877	6.2569	6.9485	6.9741
	207	328235			2	3.2631	2	2	3.1775	2	2.4115	3.729	2.5092	2.7733	3.456	2	3.2034	3.4154	2	2.7625	2	2.4868	3.9398	2.8446	4.0682	2	2	5.0688	3.6684	2.7718	2.7973	2.6972	3.8196	3.625	3.6121	5.1338	3.3018	3.7035	3.7357	3.1382	3.6965	4.37	2.8397	3.1988	4.6834	3.3097	4.2673	3.604	2.6416
	208	333329			7.8408	8.6171	8.2168	8.7427	8.2008	8.6089	8.3838	8.3836	8.4728	8.4632	8.0078	8.4285	8.3707	8.2449	8.2316	8.0162	2	3.3814	5.0983	4.5298	3.3767	4.0488	2.8045	5.021	3.9653	4.6834	4.8623	3.6666	4.4735	3.7419	5.3584	3.3536	3.4807	4.3959	3.3526	3.9767	3.3185	2.6052	3.0376	2.9793	3.3258	3.733	4.528	4.2016	3.7769
	209	320155			3.7253	2	2	2.3528	2.3956	2	2.9928	2	2.2769	2.6153	2.661	3.1406	2.7237	2.7999	2	2	6.3327	6.625	6.1461	6.1787	5.6799	6.332	6.4031	6.2321	5.8515	3.9372	6.8781	5.8748	6.6014	6.1436	6.0825	5.0198	5.3618	5.2519	5.2548	5.3889	5.3168	5.8369	4.3817	4.7718	6.1103	4.8755	3.2812	4.6507	3.8535
	210	21418	ENSMUSG00000021359	Tfap2a	2.2536	3.5656	2	2	2	2	2	2.5068	2.2769	3.2741	2.368	2	2	2	2	2	2	2	2	2.8446	2	2.957	2	3.902	2.4469	2	2	4.038	2	3.8502	3.3464	5.0198	2.8592	2	3.4583	2.1807	2.4579	3.4978	2.6102	2	3.3258	3.6382	2.7784	2	2.8047
	211	18378	ENSMUSG00000074006	Omp	4.6739	5.3951	4.7321	4.3659	5.7675	4.9345	6.668	4.3215	3.9073	4.1846	4.7051	5.5659	3.975	4.9735	4.3609	4.9291	2.7518	3.5881	4.1593	2	4.6111	4.6631	3.5192	6.5846	3.4934	2.9585	3.075	2.6972	3.0086	2	3.3464	3.2223	3.9747	4.463	3.8175	2.7375	3.0844	4.2954	3.5072	3.3892	3.3258	3.0401	3.4162	3.0565	3.2059
	212	19142	ENSMUSG00000027978	Prss12	5.9098	6.3045	5.5693	5.1752	5.7675	5.7298	5.6497	6.1567	6.1298	6.3825	6.227	5.614	6.1648	6.2456	6.0245	5.7587	8.3462	7.8171	7.5159	8.3676	7.8381	7.5775	7.7146	7.3944	7.8123	8.0202	8.1666	8.3861	8.7449	8.2876	7.8727	8.0516	8.3732	8.5396	8.2287	8.2977	8.4227	7.9896	8.2828	8.2257	8.697	8.2837	8.0357	8.3189	8.2838
	213	19116	ENSMUSG00000005268	Prlr	9.5839	9.4293	9.9066	9.6648	9.3444	9.6791	9.6675	9.7184	9.7898	9.6561	9.8029	10.1068	10.031	10.0346	9.8362	9.9454	6.4502	7.0313	7.6756	6.8306	7.8934	8.6861	7.4323	7.2252	7.6445	8.1695	7.4527	7.5635	7.0053	7.2478	7.8978	6.1429	6.9896	6.7724	6.8171	8.7045	10.4234	6.8779	6.4106	6.6969	6.7503	6.4678	10.2648	9.0342	6.7219
	214	107586	ENSMUSG00000037279	Ovol2	2	2	2	2	3.1775	2	2	2	2.2769	2.2355	2.368	2	2.4067	2	2	2	2	4.8113	3.1768	4.9569	2.9694	3.6764	2	2	4.5161	4.0234	4.2293	3.9245	5.8233	3.2033	5.0355	4.4447	5.2916	4.7586	4.3985	5.294	4.2992	4.8588	5.0652	5.0223	5.1432	4.4428	4.6967	5.3561	4.4543
	215	21338	ENSMUSG00000028172	Tacr3	8.8258	8.8022	8.385	9.1885	8.207	8.2013	8.5352	8.7704	8.9948	8.5934	9.0671	8.9575	8.8123	8.8306	8.7749	9.055	6.0644	6.6483	6.1461	6.046	6.8311	6.8852	6.9125	5.0688	7.2767	7.1468	6.3613	6.7266	6.1455	5.9383	6.4136	5.5442	5.8754	6.2896	7.1991	6.0191	6.6598	6.5491	5.6227	6.0483	5.6381	5.4221	5.7179	5.8031	5.3952
	216	70350	ENSMUSG00000045763	Basp1	13.2354	13.0922	12.9633	12.6026	13.3795	12.9625	12.8908	12.8219	12.6215	12.6165	12.8372	12.7111	12.6393	12.7058	12.7131	12.6853	13.2186	13.041	13.2175	13.3994	12.8837	12.9328	13.1057	12.9238	13.728	13.4407	13.4724	13.1	13.5218	13.3489	13.2495	12.746	12.9258	12.9118	12.9913	12.6567	12.9362	12.9599	12.651	13.0877	12.9861	13.0108	12.7949	12.831	12.8751
	217	12425	ENSMUSG00000029193	Cckar	6.8224	7.6276	7.3986	7.4932	7.5564	7.4405	7.2714	7.6748	7.465	7.4737	7.6386	7.2149	7.124	7.3967	7.327	7.3219	2	2.8501	4.518	3.7602	3.694	3.935	3.318	2	3.6684	3.7476	3.5082	5.08	3.7123	3.358	4.4252	2.2895	2	2	2	2	2.247	2	2	2	2	2.2765	4.3371	2	2.2469
	218	67434	ENSMUSG00000022237	Ankrd33b	5.0537	5.7656	5.1609	4.9864	5.9552	6.7585	5.8279	5.1694	5.3661	5.5408	5.5901	5.0406	5.8102	5.8418	5.7791	5.3788	10.6661	10.8964	10.2667	10.5417	10.6731	9.9773	10.8564	10.6726	10.288	10.0517	10.9566	10.5353	10.6207	10.3925	10.4572	10.7305	10.9507	10.9015	10.8082	11.0261	10.7785	10.7618	10.8365	10.8593	11.0237	10.8518	10.7381	10.8518	10.7356
	219	67874	ENSMUSG00000075334	Rprm	10.2124	9.7154	10.2052	9.5134	9.9487	9.7562	9.9321	10.3987	10.0698	10.0402	9.6815	9.6795	9.9111	9.9398	9.7913	10.0796	10.8823	10.7223	10.8422	11.1015	10.7021	10.5783	10.6359	10.9193	10.798	10.7801	11.2659	10.849	10.879	11.0686	10.7164	8.771	8.812	9.0072	8.8576	8.87	9.348	8.9079	8.774	9.0672	9.3683	9.2506	8.1222	9.1846	8.8603
	220	13392	ENSMUSG00000023391	Dlx2	7.5876	7.9222	7.9697	8.3506	7.8207	7.7727	7.8766	7.2171	7.539	7.3662	7.7596	7.4047	7.6951	7.8594	7.4788	7.6467	6.4274	6.8015	7.1819	7.233	6.7984	6.8698	6.6157	7.0456	7.5244	7.5756	6.8781	7.0307	7.4091	6.9402	7.2586	6.4074	6.2899	6.4471	5.8284	6.1658	6.312	6.5491	5.7967	6.2824	6.65	6.1621	6.549	6.3617	6.0602
	221	70810	ENSMUSG00000035831	Krt25	3.4488	3.5656	4.5891	3.254	4.8061	3.3411	3.7269	4.1267	3.1825	4.1846	3.8541	3.5887	3.5627	3.5122	3.1845	4.0475	2	2	3.1768	3.1334	2	3.6764	2	2	2.4469	3.9372	3.5082	2.3903	2	2	2	4.6114	2.7236	3.1724	3.1145	2	2.247	2	2.3371	2	2.6805	2.5085	2	2	2
	222	12322	ENSMUSG00000024617	Camk2a	12.9929	13.0357	13.0868	12.8834	13.3352	13.1029	13.0797	13.1063	12.9432	13.1783	13.0261	12.9828	12.9379	12.9977	12.9899	12.8644	16.5267	16.2115	16.4409	16.3125	16.486	16.1162	16.3669	16.4141	15.871	16.2665	16.1314	16.2545	16.3624	16.219	16.1102	16.469	16.5008	16.4165	16.4292	16.2905	16.4869	16.2076	16.4848	16.4809	16.4816	16.3884	16.4466	16.4056	16.4852
	223	103551	ENSMUSG00000043439	Epop	7.3635	6.844	6.1477	6.8841	6.6424	6.2781	6.5306	6.9683	6.1979	6.0222	6.7475	6.3128	6.4275	5.9145	6.6361	6.089	11.0188	10.2209	10.4126	10.7413	10.2346	9.7354	10.3542	10.3423	10.7489	10.4058	10.6013	10.5023	10.7737	10.5741	10.3578	9.579	9.5056	9.1103	9.5488	9.2179	9.6485	9.6006	9.389	9.6025	9.9048	9.4641	9.2379	9.515	9.2798
	224	11686	ENSMUSG00000032807	Alox12b	4.4887	4.5946	2	2	3.3659	3.6062	2.7312	3.178	4.4446	4.1846	4.0692	2.487	3.3942	3.7691	3.1845	2.4311	6.7543	4.9675	5.8632	5.9748	5.1674	5.9183	5.9245	6.2321	4.7676	3.8455	5.2457	5.2308	6.3201	5.7555	5.2456	7.7278	7.8495	7.8052	7.9356	7.9907	8.1989	7.1977	7.9557	7.8171	7.8188	8.0368	7.3924	7.5606	7.9022
	225	12565	ENSMUSG00000025370	Cdh9	7.4675	7.0036	7.0799	7.038	6.5676	6.985	7.2465	7.1841	7.0608	6.9932	7.488	7.4584	7.228	7.5642	7.4049	7.1056	8.3156	8.3796	8.9679	8.5192	8.4147	8.586	8.2696	8.7443	8.3183	8.0918	9.0994	8.1093	8.5327	8.5786	8.2248	9.1864	9.6042	9.6024	9.3137	9.4591	8.9441	9.1783	9.3523	9.1746	8.889	9.3304	9.2334	9.1917	9.2849
	226	100503106			2	2	2	2	2	2	2	2	2	2	2.368	2	2	2.6376	2	3.0319	2	2	2	2	2	2	2	2	2	2	2	2	2	2	2	3.5849	2	2	2	2	2	2	2	2	2.929	2	2	2	2
	227	12854	ENSMUSG00000028971	Cort	2	3.0841	2	2.3528	2	2.5956	2.7312	4.99	2.7091	2.6153	2.661	2.8505	2.4067	2	2	2	7.0801	6.1254	6.8448	6.3003	5.5678	6.4192	5.9938	6.1455	6.5775	6.0082	6.6212	6.5272	6.9354	6.5164	6.5465	6.1609	6.2778	6.4636	6.6147	6.2693	6.4416	6.4664	6.7296	6.8984	6.5234	6.9738	6.2569	6.1341	6.5136
	228	192199	ENSMUSG00000028871	Rspo1	7.4099	8.3562	8.1715	8.0282	8.5937	7.9016	8.3375	8.1036	7.948	8.0498	7.9815	8.0802	8.1168	8.049	8.0972	7.9848	5.9088	5.2368	6.5275	6.5163	6.5457	6.4192	6.2129	5.8765	5.4812	6.8013	6.1376	6.2957	6.4593	6.1004	6.6087	4.5579	3.85	4.6475	5.3402	3.927	4.2992	4.2954	4.7636	4.5504	4.1092	4.1311	4.3371	5.0565	4.802
	229	108105	ENSMUSG00000022686	B3gnt5	3.1065	4.2141	4.8202	2	4.0547	4.1947	4.2111	2.8811	4.0615	3.4714	3.8541	4.0747	4.1962	4.6293	4.6802	4.6377	3.9014	4.7264	3.9398	3.3739	4.1741	4.7994	2.8045	5.4762	3.0631	4.5734	4.4402	2.9501	4.8728	4.9095	4.6188	5.7725	4.3421	4.9107	4.2296	3.4515	4.2992	5.0525	4.228	4.8386	3.6366	4.5508	3.4162	4.1634	3.6961
	230	13593	ENSMUSG00000010476	Ebf3	9.4444	9.2814	9.0199	9.3782	9.1273	8.8644	9.2525	9.7256	9.4065	9.2981	9.5241	9.4336	9.3818	9.6029	9.3625	9.5889	4.9707	3.7688	5.8941	5.6019	4.6846	4.7329	5.9938	6.5344	4.4215	5.8985	4.5351	5.5697	5.1026	3.7419	5.206	5.5982	5.1923	5.0038	4.963	5.7454	4.4047	5.0064	4.5205	4.3813	4.6834	4.3856	5.4295	5.4059	4.5947
	231	381373	ENSMUSG00000068859	Sp9	7.4737	7.1244	5.491	6.5676	7.5171	6.985	6.2343	6.2868	6.7564	6.3326	6.5824	6.7603	6.6497	6.0974	6.9501	6.7795	7.7821	8.2411	7.7536	7.7844	7.8621	7.973	7.3289	6.8541	8.2021	8.475	7.9683	8.0223	7.4844	8.2337	7.7745	7.0248	6.8087	6.9815	6.9317	6.668	7.1289	7.248	6.356	6.9894	7.0549	7.2227	7.2278	7.3175	6.772
	232	170935	ENSMUSG00000010825	Grid2ip	5.3267	6.6645	5.7371	5.7805	6.7308	5.1982	5.7237	5.2028	6.1471	6.5226	6.1582	6.4249	5.8102	5.484	7.1701	5.1714	6.3327	5.4637	5.626	5.2259	5.1151	5.3362	4.5491	5.16	5.6985	5.4468	5.9437	5.2778	5.015	5.1822	4.8421	7.0636	6.0557	5.6187	5.768	5.2338	5.5646	5.6399	4.7636	4.9637	5.0412	5.0695	6.9779	4.8559	5.5412
	233	208188	ENSMUSG00000051136	Ghsr	7.3363	7.101	7.8957	7.2418	7.6132	7.962	7.3199	7.6808	7.7859	7.6109	7.6883	7.3056	7.8579	7.6938	7.4476	7.5747	4.9707	3.5881	3.8162	2.4833	3.1874	3.5274	4.454	3.2441	2.4469	2	2.7973	4.5008	2.8147	4.3698	5.206	4.3846	5.4068	5.1332	5.1948	5.0131	4.4547	4.2167	5.2759	4.9025	3.77	4.3856	3.4162	4.4435	4.5026
	234	207819	ENSMUSG00000048905	4930539E08Rik	7.5288	7.3191	7.2078	6.7569	7.0244	6.7585	6.7935	6.8149	6.9565	6.832	7.2108	7.0323	6.9525	7.2569	7.1443	7.2312	8.3643	7.9819	8.0836	8.1177	8.2367	8.2418	8.5131	8.7443	8.4196	8.1929	8.7046	8.1414	7.9827	8.0976	8.1744	5.928	6.1513	6.3792	6.5563	6.2891	6.5944	6.7157	6.4283	6.3062	6.798	6.0377	6.2924	5.9221	6.0109
	235	12671	ENSMUSG00000046159	Chrm3	8.9295	9.0295	8.555	8.7277	8.9098	8.7319	8.7931	8.8088	8.9925	9.0014	9.0194	9.0123	8.8123	8.9128	9.0316	9.1287	8.6561	9.3639	9.126	9.2649	8.6981	7.9066	9.2567	8.5515	9.0453	8.6308	9.3451	8.8102	9.3299	8.9478	8.7646	9.8194	9.8223	9.8717	10.0473	10.099	9.9557	9.9345	10.1549	9.9938	9.5671	10.0539	9.8595	9.7551	10.0457
	236	244813	ENSMUSG00000054360	Bsx	7.2875	7.3491	7.158	7.5709	7.5756	7.474	7.4454	7.3042	7.0237	7.2833	6.8528	6.8832	6.7578	6.9547	7.2078	6.7236	2	2	2	2	2	2	2	2	2	2	2.453	2	2	2	2	2	2.4067	2	2	2.6171	2	3.0302	2.3371	2	2	2	2.5625	2	2
	237	381310	ENSMUSG00000053963	Stum	10.0793	10.3013	10.2465	10.1146	10.6025	10.2557	9.9457	10.1859	10.308	10.6436	10.7063	10.303	10.275	10.0305	11.1106	10.1573	13.6007	13.2925	13.4729	13.4072	13.3147	13.1906	13.2861	13.4259	13.005	13.0705	13.4618	13.2028	13.3607	13.3448	13.3324	13.6145	13.782	13.7752	13.9433	13.7491	13.971	13.598	13.8272	13.8555	13.7285	13.7992	13.6276	13.8755	13.8495
	238	110304	ENSMUSG00000038257	Glra3	8.2653	7.981	8.0808	7.9972	7.7379	7.7177	7.9933	8.1976	8.0436	8.0146	7.7674	8.3666	8.4209	8.1653	8.2193	8.3038	6.8081	7.4037	7.5159	7.9327	7.1232	6.1654	7.6192	6.601	7.0738	7.4489	7.9252	7.1988	7.3566	6.8123	7.4146	3.7842	4.4747	4.0908	4.3444	4.6941	4.5951	5.0525	4.4528	4.2887	2.929	4.3261	3.5396	4.4435	4.243
	239	64817	ENSMUSG00000028369	Svep1	5.2704	5.1441	4.7321	5.3421	3.9408	5.4884	6.2594	5.5525	5.2099	5.6052	5.047	5.3556	5.472	5.5988	5.0001	4.7162	3.7629	5.8321	4.7384	5.6019	5.0047	5.4231	4.7223	6.0534	5.3842	5.21	4.2293	5.026	5.7708	4.751	4.9421	7.0248	4.295	4.5272	4.4507	4.5036	4.1249	5.0064	4.7065	4.2887	4.8734	4.3261	4.2673	5.1374	4.4543
	240	18072	ENSMUSG00000048540	Nhlh2	8.0436	7.861	7.7797	8.0704	7.5851	7.8768	7.7408	8.1513	8.0802	7.7647	8.2363	8.1472	8.2949	8.1351	8.1304	8.0006	4.2514	4.5399	4.5952	4.4268	3.8298	3.935	5.8886	4.7546	4.6049	5.0133	4.7079	4.2412	5.1445	4.5084	4.3544	5.7725	5.5135	5.6187	5.3677	5.7164	5.4946	5.4116	5.5271	5.7341	5.2837	5.3934	5.5809	5.687	5.6524
	241	320145	ENSMUSG00000048562	Sp8	6.3916	6.2204	5.9472	5.0359	6.2223	6.4566	5.8279	5.5781	6.1298	5.873	6.1345	6.1912	5.6696	5.9145	5.996	6.2821	5.0323	5.6596	5.7663	6.3291	6.1895	5.6919	5.8886	4.4992	6.146	5.8985	5.0017	6.02	5.4078	5.1822	5.6221	5.0198	5.7236	5.2893	4.7711	5.4606	5.0502	5.7833	5.3146	5.0223	4.9315	5.3342	5.7942	5.5159	5.3694
	242	53419	ENSMUSG00000005220	Corin	2.2536	4.7225	5.3795	5.0839	5.6636	6.1174	5.8279	5.9164	5.9037	5.2495	5.2806	4.8924	5.5138	4.8676	5.3545	4.7162	2	2.4868	2.3953	2.4833	2	2	3.318	3.5441	2	2.3055	3.3078	2.9501	2.5907	3.358	3.4853	4.4447	2.4067	2.5864	3.5568	3.7087	2.8049	4.0451	3.0376	2.9793	3.4895	2.5085	3.4162	3.0565	3.4223
	243	110075	ENSMUSG00000029335	Bmp3	6.7209	6.4777	6.0418	6.8006	6.6055	6.1174	6.1564	5.4997	6.3099	6.7004	6.6339	6.6023	6.2413	6.6486	6.5603	6.9354	7.6508	8.7675	8.0428	8.4747	7.8621	7.7217	8.2271	8.2788	8.2918	7.4095	9.1149	8.0631	8.5208	8.4032	8.3161	5.6755	5.7588	5.8867	4.963	5.6566	5.5646	6.2063	5.6532	5.8026	5.2384	5.5834	4.9402	5.8155	5.1442
	244	18505	ENSMUSG00000004872	Pax3	2	2	2	2	2	2	2	2	2	2	2	2	2	2.4547	2	2	2	2	2	2	2	2	2	2	3.0631	2	2	2	3.3322	2	2	3.7842	2.2176	2	2	2	2.247	2	2.3371	2	2	2	2.5625	2	2
	245	170638	ENSMUSG00000046093	Hpcal4	12.7674	12.9918	13.0085	13.0058	13.1208	13.1701	13.0289	12.9531	12.9292	12.9399	12.9653	13.0086	13.003	13.03	12.9125	12.8961	15.5708	15.2248	15.4877	15.287	15.5188	15.3513	15.3442	15.3519	14.8826	15.2165	15.1787	15.28	15.2306	15.1985	15.2006	14.3028	14.5555	14.5774	14.6043	14.3652	14.604	14.4962	14.3741	14.6288	14.5933	14.4106	14.2897	14.6234	14.4011
	246	380787	ENSMUSG00000087075	Lbhd2	8.3459	7.8679	7.9058	8.0035	8.0982	7.8641	7.7138	7.053	7.0699	7.421	7.3092	7.4845	7.8168	7.345	7.5294	7.4879	4.1439	5.6131	6.2453	5.7372	6.0009	6.598	6.5482	4.1886	6.6419	6.4586	5.2457	5.5697	5.9702	5.9865	6.448	3.3536	2.9832	2.8092	4.7295	4.9144	3.4227	4.7512	2.6102	3.8443	3.4895	2.8837	4.3371	3.2868	2.8047
	247	100502846	ENSMUSG00000109372	Gm19410	6.542	6.2631	6.1132	5.919	6.4053	6.1174	5.7593	6.2394	6.524	6.5115	6.0099	5.8732	6.3374	5.9495	5.8445	6.3077	8.2779	8.3444	8.2953	8.1744	8.314	7.8528	7.9593	7.7722	8.1366	8.1695	8.321	8.4895	8.6716	8.6212	8.2974	7.9254	8.3845	8.0267	7.8507	8.2977	7.7509	7.7591	8.1231	7.9133	8.3532	7.8539	7.9659	8.2794	7.8044
	248	68144			2	2.6416	2	2	2	2.5956	2.7312	2	2	2.7733	3.6013	2	2.7237	2.9458	2.3986	2	5.4025	4.8113	3.8162	2.8446	3.5441	5.0926	4.2427	4.4276	4.9138	4.1818	5.3007	4.5008	5.1852	5.6695	6.5465	3.8744	4.0333	4.3254	3.7357	4.0714	3.0844	4.8588	3.5072	4.0836	6.5607	5.505	5.9132	6.1634	4.9487
	249	54612	ENSMUSG00000018822	Sfrp5	9.1407	8.8866	8.6391	8.7163	9.0156	8.2982	9.0081	8.5288	8.5724	9.0408	8.6618	8.415	8.3068	8.3633	8.3712	8.9287	3.7629	5.7909	6.0116	5.8998	6.0848	4.1543	5.2035	5.5454	6.7235	6.9071	6.1376	5.9921	5.7438	5.5137	6.9699	3.3536	3.394	2.8092	3.6491	3.5202	5.943	2.6052	2.8397	2	3.6366	3.0401	4.9402	4.4435	3.5195
	250	320563			9.1388	9.3198	9.0566	8.4499	9.2931	9.1137	8.8966	9.2941	8.8113	9.0466	8.9016	8.9387	8.4957	9.038	8.941	8.7159	10.7464	10.7441	10.4586	10.9024	10.3106	10.088	10.5849	10.5077	11.1484	10.4782	11.1601	10.8606	10.782	10.9096	10.6074	11.1685	11.1602	11.2823	11.4302	11.3774	11.4366	10.927	11.4185	11.3145	11.1508	11.5112	10.9567	10.9944	11.5374
	251	14778	ENSMUSG00000018339	Gpx3	11.6932	11.6279	11.7457	11.6209	11.6331	11.4622	11.6198	11.5768	11.5696	11.626	11.5599	11.3889	11.5597	11.5259	11.358	11.5601	8.1928	8.301	8.8933	8.6846	8.8255	9.3943	8.4712	8.688	9.2485	9.3107	8.6632	8.9972	8.3657	8.7971	9.1514	6.4666	6.0975	6.308	6.1616	6.155	6.7122	6.4834	6.3744	6.2336	6.2766	5.9418	6.8645	6.6368	6.0602
	252	280635	ENSMUSG00000050700	Emilin3	2	3.696	2	2	4.1603	2.5956	2	3.0372	2.8848	2.7733	2	3.1406	2.9834	2.9458	2.9669	3.9206	3.0185	2	2	3.5799	2	2	4.7223	2	2	2	3.075	3.518	3.0086	3.0301	2.8249	3.4739	3.2032	3.1724	2.2561	2.8486	2.8049	2	2	2	2	2.5085	2	2.678	2.6416
	253	386753	ENSMUSG00000029878	Dbpht2	8.8011	8.8832	8.8551	9.0922	8.3972	8.8957	8.8354	8.833	9.0987	8.8566	9.0764	9.3293	9.2147	9.1152	9.0731	9.1322	10.3298	10.3613	10.4272	10.335	10.3149	10.3587	10.3142	10.3569	9.8417	9.9202	10.4482	10.105	10.0478	10.3332	10.41	8.7885	9.0145	9.035	8.7883	9.1585	8.2564	9.3026	9.0453	9.1353	8.957	9.0257	8.9571	8.9457	8.9149
	254	246317	ENSMUSG00000050321	Neto1	9.0703	9.1819	9.2552	9.3368	9.2218	9.5901	9.2742	9.3322	9.1598	9.0388	9.1343	9.1695	9.3331	9.2318	9.0833	9.3325	10.1814	10.2306	10.2474	9.9455	10.0028	10.0181	10.1304	9.8168	9.9065	9.9259	10.2137	9.8098	10.2375	10.0423	10.1331	10.649	11.1088	11.2793	11.2103	10.8628	11.0531	11.0597	10.8571	11.0281	10.5973	10.9817	10.5791	11.1082	10.9983
	255	12373	ENSMUSG00000027861	Casq2	4.8763	5.2327	5.2899	5.8652	4.9892	6.1174	4.9261	4.9512	5.6106	5.2495	5.1916	5.1749	4.9708	5.4599	5.6387	5.2261	5.5361	5.9862	4.6686	4.1957	4.9461	5.0926	4.6383	5.2868	4.5161	5.8284	4.2293	4.3331	4.6583	5.2627	4.4252	6.8243	4.5569	4.0908	5.0331	4.7807	4.7633	4.4409	5.3146	4.7017	4.8734	5.2405	5.7179	4.3784	5.1134
	256	74369			2.6568	2	3.1727	2	2	2	2	2	2.2769	2	2	2.8505	2	2	2	2	5.6969	7.0663	6.5076	6.1787	6.0848	6.7738	6.2698	6.4283	6.8378	5.4776	6.0758	5.9636	6.7979	6.5648	6.188	4.3846	3.85	3.7035	3.9683	4.398	3.5198	4.9589	3.8608	4.1898	4.8128	3.8219	4.7991	4.2387	3.4223
	257	17240	ENSMUSG00000032717	Mdfi	2	2.6416	2.8767	2	3.1775	3.016	2.9928	2	3.1825	3.8716	3.6013	2.8505	2.7237	3.603	2.9669	3.6273	3.6096	4.5399	2.3953	3.1334	4.1741	3.8115	3.084	2	3.0631	3.9372	3.3078	3.9245	3.8196	4.751	3.6121	4.8524	3.4807	3.3246	3.1145	3.048	2.4579	3.7421	3.367	2.4047	2.929	2.2765	3.5396	3.2141	2.6416
	258	13982	ENSMUSG00000019768	Esr1	7.8884	8.3162	8.1631	8.3209	8.2907	8.2698	8.4452	8.5321	8.3951	8.3858	8.3121	8.3945	8.4372	8.7081	8.1499	8.6118	7.4734	7.3621	7.7869	7.8456	7.1494	7.8528	7.5634	7.1156	6.3134	7.731	7.4158	7.8387	7.2359	7.695	7.4404	4.9385	5.5935	5.7854	5.7263	5.3327	6.1239	5.9138	4.7065	5.3317	4.9315	4.8755	3.9489	6.144	4.9832
	259	211577	ENSMUSG00000031070	Mrgprf	3.7253	3.2631	3.0323	2	3.6818	4.4855	2.9928	2	3.9073	3.4714	2.661	3.5887	2.7237	4.7132	3.1845	2	5.0323	5.1741	4.4363	5.9748	5.2665	6.0876	2.8045	6.1895	4.8426	4.7856	4.7872	5.4921	5.9229	5.2627	4.893	5.5982	3.7134	4.463	3.8175	4.602	3.0844	4.2167	4.5205	3.8443	3.6366	3.6382	4.7991	3.7136	4.0613
	260	106565	ENSMUSG00000047428	Dlk2	8.9699	9.168	8.9774	8.4545	9.2429	8.8453	8.7931	8.5548	8.6073	8.8958	8.3842	8.3806	8.5266	8.433	8.5484	8.3721	9.4685	9.2544	9.4996	9.4002	9.1802	9.569	9.0241	9.452	9.7103	9.2109	9.0916	9.3774	9.3768	9.8142	9.6102	8.6031	8.6484	8.6043	8.3944	8.5732	8.6939	8.7387	8.6585	8.5587	8.5792	8.636	8.7775	8.473	8.7545
	261	320051	ENSMUSG00000034584	Exph5	6.7209	5.7049	5.9275	6.33	6.4683	5.9366	6.1294	6.0869	6.3994	6.4774	6.716	5.7056	6.2902	6.4055	6.5603	5.9976	8.56	8.6628	8.3068	8.1981	8.8214	8.0015	8.4281	8.6293	7.8672	8.4165	8.2175	8.2277	8.8016	8.5018	8.3438	8.9708	7.0117	7.4306	6.9039	7.3775	7.0739	7.3062	7.0944	6.7325	6.5234	6.9043	6.9223	7.2417	7.008
	262	319970			7.1845	6.7866	7.1495	6.727	6.5867	6.554	6.741	7.7331	7.3722	7.2833	6.8816	6.9782	7.4908	7.3581	6.9501	6.9679	2	2.4868	2	2.4833	2.3998	2	3.318	2	4.4215	5.4468	2.453	4.038	2.5907	2	2.3301	2.2895	2.7236	2	2	2	2	2	2.3371	2.7205	2	2	2.3085	2.4436	2
	263	19418	ENSMUSG00000021708	Rasgrf2	12.3523	12.2869	12.342	12.4398	12.2477	12.482	12.3665	12.4032	12.3025	12.3612	12.4642	12.6042	12.6536	12.5065	12.3791	12.4282	11.7613	11.962	11.8908	11.8332	11.8567	11.4153	12.0039	11.9648	11.7343	11.5483	12.1727	11.8129	11.8614	11.7293	11.747	10.8978	10.9766	11.352	11.0015	11.2835	10.9392	10.9606	11.2163	11.1792	10.8927	11.1119	10.7494	10.9569	11.118
	264	239336	ENSMUSG00000060735	Rxfp3	8.2617	8.1946	8.341	7.6763	8.7329	8.4661	8.1356	8.1298	8.1202	8.258	8.1024	8.2873	7.9894	8.3633	8.0769	8.2187	8.1448	6.7594	7.7786	7.233	7.5043	7.7472	7.4072	6.4999	6.7818	7.4489	7.5581	7.1491	6.9708	7.534	7.0393	6.6942	7.0044	7.0043	7.2292	6.879	7.1593	7.6436	7.2422	7.0889	6.6149	6.7199	6.4736	7.2599	7.1206
	265	16956	ENSMUSG00000015568	Lpl	5.6026	5.795	5.464	5.0839	5.2976	5.1156	5.5312	6.2394	5.6354	5.4025	6.1815	6.0928	5.8102	5.8786	6.0799	4.7907	8.5442	8.3229	8.878	8.5192	8.3427	8.7036	8.4028	8.0296	7.5692	8.3176	8.2318	7.9517	8.4927	8.5142	8.9289	8.771	9.2096	9.333	9.3277	9.1409	9.121	9.2218	9.1479	9.0462	8.7785	9.1317	8.8862	9.2801	9.17
	266	15562	ENSMUSG00000026322	Htr4	6.8894	6.742	6.8793	6.9109	6.1473	7.1394	6.2088	6.069	6.9064	7.0092	6.6837	6.8231	6.5328	6.7315	7.0083	6.9354	6.1502	6.0575	6.6772	5.9378	5.6799	6.2391	6.0599	3.0669	5.2252	6.2419	5.1288	5.905	6.1861	5.4804	6.1256	7.8158	8.2521	8.3127	8.0626	8.1402	8.0319	7.9837	8.1922	8.2627	7.7558	8.3185	7.8867	7.9972	8.2665
	267	406220	ENSMUSG00000067594	Krt77	7.2875	7.3392	7.141	7.166	6.9818	6.7585	6.9089	6.9089	6.687	7.2229	6.7936	6.7388	7.0691	7.163	6.8261	7.1056	8.3939	7.3761	8.352	8.1585	7.7467	7.8528	8.0186	8.4376	7.7358	8.1263	7.9936	7.9804	7.4176	8.2876	8.0678	6.7429	6.7401	6.7457	6.9132	6.508	6.9222	6.7718	6.2993	7.1161	6.7503	6.3382	6.2924	6.7376	6.3516
	268	329641	ENSMUSG00000056306	Sertm1	8.5009	8.4608	8.4486	8.7427	8.7113	8.5861	8.4176	8.5222	8.4624	8.5748	8.6113	8.5875	8.5112	8.4206	8.6661	8.6869	10.3329	9.6413	10.3246	9.8885	9.6436	10.2061	9.4992	10.2045	9.3579	9.7584	9.7799	9.7506	9.6591	9.8554	9.8605	10.7838	10.9287	10.8732	10.9481	10.902	10.9835	10.6267	10.808	10.8563	10.971	10.9226	10.6075	10.7258	10.7191
	269	228550	ENSMUSG00000027296	Itpka	6.7521	6.8012	7.141	6.6335	7.4035	7.9502	7.0305	6.76	6.6988	6.777	6.8383	6.7603	6.8905	6.9972	6.9048	6.6047	11.866	11.6057	11.5917	11.9666	11.3653	11.3405	11.3943	11.618	11.5277	11.434	11.8443	11.6451	11.8536	11.8531	11.7102	12.3377	12.1458	11.9384	12.273	12.2217	12.3136	11.9162	12.3245	12.3794	12.6063	12.4435	12.0926	12.2092	12.2675
	270	244882	ENSMUSG00000074345	Tnfaip8l3	5.5796	6.0108	6.3085	5.5945	5.2506	6.2396	5.7237	6.4204	6.4561	6.3198	6.2492	6.4249	6.6683	6.2456	6.3286	6.2025	7.6508	7.6426	8.1167	7.9043	7.564	7.9873	7.9331	7.6438	7.1348	7.824	8.174	7.5054	7.6963	7.0912	7.3971	8.275	8.8307	8.9615	9.0706	8.8618	8.9042	8.8041	8.746	8.7959	8.3155	8.828	8.5058	8.8333	8.8132
	271	14601	ENSMUSG00000027643	Ghrh	6.0504	7.3882	7.3402	7.3826	7.1451	6.812	7.4563	7.2731	7.0143	7.2898	7.3611	6.9964	7.2893	6.7415	6.8261	7.499	2	2	2.3953	3.9204	4.2727	3.5274	2	2	3.2942	2	3.6842	2.9501	2.3254	3.358	3.3464	2.2895	2.2176	2	2	2.1807	2	2	2	2.4047	2.6805	2.5085	2.7784	2	2.2469
	272	330188	ENSMUSG00000043036	Ccdc63	2	2	2	2	2	2	2.7312	2	2.8848	2.6153	2.368	2	2.4067	2	2.9669	2	3.9014	3.9294	2.3953	3.1334	2.3998	2	4.5491	3.4019	2	4.515	3.3078	2	2	2	3.3464	4.6114	3.3018	4.0908	3.3526	2.9517	2.8049	3.3581	2.3371	3.9689	2	3.9848	2.7784	3.0565	2.9512
	273	17116	ENSMUSG00000056947	Mab21l1	5.4587	5.4699	6.1477	5.7211	5.7675	5.4884	5.9562	6.8574	6.1298	6.3452	5.8152	6.3416	5.7763	6.0171	5.5631	6.4293	5.5361	6.8015	6.7634	6.7688	6.6225	6.598	6.8391	6.9594	7.3427	6.346	6.8961	7.1107	6.3017	6.5164	6.6536	7.2436	5.7058	5.2134	4.6424	6.1871	4.8406	5.8886	5.2759	5.8357	5.9787	4.995	5.2604	5.5007	4.6386
	274	229687	ENSMUSG00000043873	Chil5	2	3.5656	2.8767	2	2	3.3411	3.2142	2	3.1825	3.2741	3.1126	2	2.4067	2.7999	2.9669	3.4548	2.4243	2.4868	2	2	2.3998	2.3937	3.995	3.4019	3.9653	4.1818	2.7973	3.3524	2.8147	3.0301	2.8249	3.2223	2.7236	2	2	2.9517	2	3.3581	2.6102	2.4047	2	2.8837	3.2812	3.2141	2.9512
	275	69642	ENSMUSG00000032355	Mlip	4.6298	3.926	4.3138	4.4415	3.8171	3.8301	3.864	4.785	4.5526	4.6597	4.2563	3.382	4.3879	4.2342	4.3609	5.2261	8.6164	8.062	7.9355	8.3883	8.0684	7.1246	8.3244	7.6595	7.9027	7.7181	8.3409	7.8774	7.9594	8.2136	7.7051	7.647	7.7083	7.5968	7.295	7.8708	7.3889	7.8467	7.7167	7.641	8.1043	7.8433	7.4565	7.9476	7.6141
	276	20183	ENSMUSG00000015843	Rxrg	8.4511	8.8344	9.0152	8.5038	8.5937	9.0923	8.7227	8.8436	8.6805	8.7935	8.7226	8.6291	8.7217	8.746	8.6295	8.8698	8.7183	8.4208	8.9123	8.7447	8.9499	9.0044	8.7959	8.4467	9.1923	8.7868	9.215	9.025	8.8404	8.8888	8.6658	6.4225	6.6305	6.4961	7.0207	6.0072	7.1289	7.0237	5.5916	7.1295	6.9179	6.2923	6.044	7.3088	6.2277
	277	14560	ENSMUSG00000021943	Gdf10	6.2384	6.7269	6.7507	7.3039	6.9818	6.9377	7.0305	6.8149	6.844	6.2543	7.1764	6.7603	6.4492	6.6272	6.3956	7.0152	7.8521	7.4308	7.8513	7.7948	8.0956	7.5869	7.8137	8.0713	7.9627	7.9723	7.6351	8.1477	7.9476	7.1872	6.9095	9.1886	8.0184	7.8245	7.8985	7.9601	7.8477	7.5663	8.0504	7.7405	7.7797	7.9556	7.74	8.0399	8.0599
	278	57740	ENSMUSG00000015981	Stk32c	10.9027	10.9592	10.8352	10.4421	11.1366	10.8196	10.855	10.585	10.437	10.8232	10.679	10.6816	10.5058	10.5665	10.7134	10.5058	11.759	11.6964	11.5462	11.82	11.6318	11.2303	11.5424	11.6757	11.8827	11.6807	11.882	11.8029	11.918	11.8777	11.6775	10.6466	10.5387	10.5931	10.6435	10.665	10.6136	10.639	10.7952	10.7701	10.8281	10.8551	10.5746	10.5526	10.8197
	279	15186	ENSMUSG00000027360	Hdc	9.9719	10.3773	10.2103	10.2546	10.1907	10.2314	10.5403	10.0888	10.0071	10.3202	10.3051	9.648	10.0647	10.0578	9.7342	10.1199	5.7711	6.1254	5.7993	5.7372	5.6435	4.9239	5.7353	5.8216	5.4812	6.5339	5.0017	6.7434	6.1036	6.1855	5.5606	5.4299	5.0856	5.3615	5.2838	5.7597	5.2617	5.2629	5.4938	4.4683	5.8639	5.5577	6.1251	5.4698	5.4941
	280	54352	ENSMUSG00000031737	Irx5	6.5538	6.7115	6.3827	6.33	6.7647	6.0298	6.9861	6.9683	6.4421	6.4659	6.4543	5.9122	6.6308	6.5721	6.5007	6.8682	2	3.9294	3.8162	3.3739	3.1874	3.1732	3.995	2	2	4.9265	2.453	4.4194	2	4.3698	3.9367	4.5024	2	2	2.8293	2.9517	2.8049	3.0302	2.6102	2.7205	3.3258	3.3097	3.4162	2	2.4577
	281	435376	ENSMUSG00000078958	Atp6ap1l	3.1065	3.4223	2	2	3.1775	4.0239	2	2	3.0413	2.7733	3.2945	3.1406	3.2034	3.0783	3.9501	3.6273	7.57	7.8171	7.3249	7.4972	6.7131	6.7572	7.8421	7.0926	7.3934	7.4798	7.8066	7.8071	7.7311	7.6878	7.3433	4.7126	3.9137	4.0908	4.7295	4.2027	4.4547	4.635	3.9617	4.3813	5.1915	4.264	4.0353	5.4221	3.9261
	282	15373	ENSMUSG00000040148	Hmx3	7.1614	7.0653	7.2559	6.6335	7.2445	7.2208	7.0305	6.9585	6.5889	6.6195	6.3554	6.3699	6.6683	6.9374	6.3956	6.5839	2	2	2	2	2	2	2	3.5441	2	2	2	2	2	2	2	2.2895	2	2	2	2	2	3.2035	2	2	2	2	2	2.9708	2
	283	213788	ENSMUSG00000074939	Chrm5	7.3086	7.3882	8.0853	8.3506	7.3818	7.601	7.8847	7.5247	7.8348	7.8864	7.6386	7.7225	7.8416	7.9003	7.5878	7.7057	5.7711	4.9675	5.342	5.6484	6.4005	5.2906	5.5175	4.3522	5.1086	5.8985	5.1884	5.7133	5.1026	4.9095	5.3584	5.3378	6.0975	5.5276	6.5799	6.0887	6.5491	5.863	5.9021	6.4838	5.4912	5.7737	4.9402	5.7654	5.6737
	284	268354	ENSMUSG00000044071	Fam19a2	9.1109	9.3841	9.4864	9.2476	9.1847	9.6278	9.149	9.4305	9.4733	9.2434	9.6146	9.6451	9.5912	9.5282	9.7535	9.6969	11.2397	11.6675	11.0876	11.322	11.2329	10.2793	11.7048	11.4109	11.3432	10.7013	11.7479	11.2916	11.187	11.2363	11.0404	10.2346	10.3544	10.438	10.1779	10.5577	10.0236	10.4648	10.4283	10.4597	10.3426	10.4926	10.3558	10.1482	10.1891
	285	56720	ENSMUSG00000028011	Tdo2	3.8068	2.3562	3.4181	2	3.3659	2	3.2142	2	3.0413	2.7733	3.1126	2	3.8502	3.4154	3.9501	3.2587	4.445	2.8501	3.5316	4.7161	2.3998	3.8115	3.318	2	3.8245	2.3055	2	2.3903	3.0086	3.9508	4.4252	6.9541	7.1766	6.9231	6.6374	7.125	6.028	6.9648	7.1596	6.3754	6.7176	7.2865	6.8164	6.5134	6.7622
	286	14608	ENSMUSG00000031932	Gpr83	8.9677	9.1194	9.2923	9.1269	9.1402	9.3308	9.2049	9.5406	9.1598	9.2145	8.9362	8.9434	9.1131	9.0401	8.9222	9.107	8.6899	8.9091	8.4798	8.8178	8.7547	8.9505	8.9168	8.3386	9.3801	8.9415	9.3052	8.8612	8.7618	9.2539	8.8762	7.8044	8.0612	8.0322	7.8013	8.0902	8.0845	8.157	8.0675	8.0535	7.5392	8.087	7.7844	7.9448	8.1115
	287	16521	ENSMUSG00000032034	Kcnj5	8.4762	7.9222	8.0629	8.0404	8.0162	8.2408	8.1624	8.0813	8.1114	8.1103	8.2139	8.1224	8.2829	8.3794	8.0215	8.121	3.6096	5.0397	4.8686	4.8009	5.1674	2	4.8769	5.4402	4.6049	4.0234	5.0667	4.2412	4.3357	4.2165	3.4853	4.1154	3.5625	3.9101	3.6491	3.2231	4.3529	3.4978	3.2117	4.2887	4.3837	3.9056	3.9489	3.3561	3.3182
	288	18292	ENSMUSG00000001103	Sebox	2	2	3.4181	2	2.7057	3.8301	2	2	2.2769	2.4379	2.661	3.382	2.7237	3.4154	2	2.7625	3.6096	4.0739	2	2.8446	3.1874	3.8115	2	2	3.0631	3.2719	2.7973	3.3524	2.8147	3.2033	3.1926	6.8356	6.9896	6.6907	7.0378	7.063	6.6491	6.8258	6.9298	6.6039	6.5234	6.9345	6.9779	6.8559	6.8109
	289	12426	ENSMUSG00000030898	Cckbr	8.0436	8.0126	7.5986	7.5625	8.4345	7.7994	7.9245	7.6387	7.7295	7.8821	7.3713	7.9551	7.6396	7.7092	7.4581	7.9364	9.8483	10.0237	9.7981	9.8812	9.8089	9.2079	9.904	9.8514	9.7715	9.0887	9.9807	9.981	9.9195	9.9707	9.6949	7.3575	7.4373	7.7186	7.2142	7.4974	7.4332	7.923	7.1702	7.5837	7.5942	7.2308	7.073	7.4018	7.2107
	290	15375	ENSMUSG00000035451	Foxa1	6.8894	6.6804	6.3535	6.4261	6.2223	6.9134	6.5306	7.0066	7.2651	6.7677	7.153	6.5538	6.9062	7.1925	7.0643	6.7236	2	2	2	2	2	2	2	2	2	2	2	2.3903	2.3254	2	2	2	2.2176	2	2	2.6171	2	2.6052	2.3371	2	2	2	2	2	2.4577
	291	100502679			2	2	2	2	2	2	2	2	2	2.2355	2	2	2	2	2	2.4311	2	3.14	3.8162	2	3.5441	2	2	2	2	2	2	2.6972	2.5907	3.2033	2	3.7842	2.5738	2.3228	2.2561	2.4858	2.4579	2	2.8397	2.7205	2.38	2.2765	2	2.678	2
	292	385354	ENSMUSG00000036131	Frmd7	5.5796	5.7356	5.3204	6.4628	5.8328	5.6141	5.4894	5.5525	5.7533	5.6052	6.1815	6.3699	5.9383	6.3144	6.1068	6.2821	4.445	4.9675	5.2494	4.1957	3.694	6.1399	4.6383	5.7934	3.8245	4.7354	5.5931	5.1823	5.1852	4.9095	5.1233	6.3457	6.668	6.4305	6.6374	6.4027	6.4292	6.8651	6.3373	6.5846	6.4052	6.8096	6.489	6.9927	6.605
	293	14654	ENSMUSG00000000263	Glra1	7.7303	8.1891	8.0263	8.123	7.7293	8.2212	8.3077	7.8054	7.6886	7.8018	7.7124	8.1795	7.952	7.8823	7.8411	7.7057	4.6941	3.3814	5.5887	4.9569	4.9461	5.2436	4.8017	4.3522	5.4335	5.8284	4.9337	5.5697	3.1795	5.4114	5.5606	3.2223	2.7236	2.5864	2.2561	2.1807	2.247	2.6052	2	2.9793	2	2.5085	2.3085	2	2
	294	117148	ENSMUSG00000031837	Necab2	10.044	10.1671	10.2574	9.8684	10.0065	9.9204	9.8986	10.1994	9.8598	10.0728	9.9235	9.7484	9.7826	9.7292	9.9048	9.7257	11.0255	10.8394	11.2762	11.3336	10.9032	10.9941	10.9487	10.9045	11.0677	11.2657	10.8395	11.095	10.8405	11.1836	11.245	10.3501	10.5871	10.6847	10.767	10.4539	10.8196	10.7893	10.4888	10.6356	10.5984	10.5724	10.5445	10.7653	10.5712
	295	244579	ENSMUSG00000043668	Tox3	8.6071	8.4562	8.4029	8.4771	8.5652	8.3352	8.2082	8.833	8.2301	8.3549	8.5633	8.6408	8.6155	8.4846	8.7581	8.6272	8.8567	9.3814	8.9859	9.3762	9.161	8.8481	9.549	9.2899	8.7419	8.9905	9.8736	9.372	9.3702	9.3721	9.043	7.5748	7.6719	8.0211	7.6365	7.2718	7.7103	7.8136	7.4124	7.6316	7.5013	7.3773	7.3425	7.4659	7.2466
	296	544963	ENSMUSG00000021676	Iqgap2	6.9172	6.9654	6.8271	6.2483	7.0658	7.2009	7.2958	7.5378	6.9565	7.0328	7.0429	7.3056	7.3936	7.0384	7.1572	6.7977	9.2493	8.5926	9.2773	8.9629	8.4884	8.9209	8.8389	9.1214	8.3313	8.3964	9.4614	8.6228	8.834	8.876	8.8411	11.2768	11.3753	11.2356	11.3431	11.4949	11.221	11.0807	11.5864	11.3959	11.276	11.4855	11.2863	11.1747	11.4002
	297	100040294			5.7334	6.1077	5.8248	6.5335	6.1214	5.6731	5.2601	5.9561	6.2469	6.2809	6.0357	5.8732	6.2413	5.6206	6.1068	6.2295	3.2436	4.9675	4.5952	3.5799	2.7126	4.2525	5.4697	3.902	4.8426	4.0234	5.2457	4.1432	4.3357	4.6941	4.1185	6.6179	4.8123	5.1332	4.3985	4.3609	3.8538	5.0064	4.3069	4.4683	5.1915	4.699	5.224	4.7823	3.7769
	298	22045	ENSMUSG00000038760	Trhr	8.0394	7.7528	8.0584	7.2937	7.3818	7.6459	7.6394	7.9152	8.0847	7.9663	8.2584	8.2189	8.0894	8.3794	8.2973	8.1496	8.5442	7.8375	8.8228	8.3252	8.1933	9.0766	8.1759	8.083	7.1046	8.5712	8.3733	8.1093	8.1968	8.2585	8.6731	5.8412	6.5223	7.3172	6.6707	6.5332	6.9487	7.4678	6.1575	6.9597	6.3846	6.454	6.044	7.5716	6.2841
	299	12903	ENSMUSG00000032291	Crabp1	6.9263	8.0798	7.7852	8.0645	7.4768	7.2208	7.7229	8.1976	7.6707	7.712	7.0929	6.8025	7.686	7.3251	7.2567	7.2312	4.9707	4.8113	5.1505	5.8998	5.8493	5.7603	5.4697	4.4992	5.5721	6.7132	5.7595	6.3184	5.0595	5.5137	6.1042	3.3536	2.8592	3.8105	3.5568	3.7665	3.6965	4.2167	3.6349	3.3892	3.3258	3.0401	4.1169	3.0565	3.9261
	300	58226	ENSMUSG00000024112	Cacna1h	10.425	10.5809	10.1929	10.6253	10.5391	10.5709	10.5351	10.4413	10.243	10.3897	10.3572	10.14	10.2082	10.2395	9.994	9.9616	10.8906	10.6449	10.5717	10.6313	10.3675	10.6689	10.6864	10.3091	11.0803	10.8436	10.8231	10.9566	10.5049	10.8939	10.8781	11.5423	11.6475	11.7027	11.5877	11.7503	11.731	11.3658	11.8195	11.7818	11.7584	11.8499	11.5508	11.4647	11.9495
	301	50929	ENSMUSG00000074695	Il22	2	2.3562	2.504	2	2	2	2	2	2.2769	2	2	2.487	2	2	2	2	2	2	2	2.8446	2	2.3937	2.4576	2	2	2	2	2.3903	2	3.0301	2	2.5305	2.2176	2	2	2	2.8049	2	2	2	2	2	2	2	2
	302	15561	ENSMUSG00000032269	Htr3a	4.7167	5.9855	5.491	5.0359	4.3508	6.1174	5.1572	4.9512	5.507	5.3023	4.6394	5.2978	5.429	5.5765	4.8805	4.0475	7.2322	6.716	7.4022	7.3642	7.2497	7.3299	7.745	6.601	6.8917	7.1372	6.9995	6.989	7.4597	7.371	6.9934	7.4112	7.3421	7.5742	7.6754	7.6623	7.7855	7.3621	7.5884	7.7665	7.1801	7.6198	7.2461	7.7591	7.6839
	303	64293	ENSMUSG00000029123	Stk32b	8.4383	7.861	8.2005	7.6205	8.1884	8.3713	8.0874	8.147	8.1246	8.1719	8.1738	7.8784	7.9746	8.073	7.9564	7.9364	7.2711	6.7594	7.7021	7.0886	7.6306	6.8226	7.1585	6.9969	7.3555	7.0057	7.2155	7.3383	6.9354	7.1131	6.7939	6.6438	6.8582	6.9231	6.9945	6.8526	6.7122	6.9033	6.8131	6.8178	6.231	6.5994	6.0851	7.0196	6.9481
	304	207911	ENSMUSG00000050164	Mchr1	7.3086	7.4357	7.9841	7.9135	7.876	7.8514	7.5507	7.8377	7.5325	7.869	7.8855	7.5601	7.6768	7.5642	7.7069	7.4539	8.7644	8.5623	8.1363	8.4747	8.2907	7.6423	8.5765	8.2323	8.5258	8.2522	8.4785	8.4021	8.5327	8.4977	8.1998	8.3827	8.1532	8.4597	8.5845	8.3244	8.7094	8.3117	8.2828	8.3907	8.6716	8.6268	8.3793	8.5927	8.5281
	305	60531	ENSMUSG00000029831	Npvf	5.9641	6.9654	7.3842	6.6654	5.8328	7.0752	6.1828	6.7711	6.0583	6.3578	6.951	6.6023	7.1105	6.4912	7.437	7.1487	2	2	2	2	2	2	2	2	2	2	2	2.3903	2	2	2	2	2	2	2	2	2	2	2	2	2	2	2.3085	2	2.2469
	306	170676	ENSMUSG00000092035	Peg10	13.2258	13.296	13.4947	13.6297	13.4121	13.589	13.5108	13.4798	13.4327	13.422	13.383	13.6679	13.5049	13.7567	13.3772	13.5176	10.7197	10.3648	11.2465	10.7019	11.3363	11.2763	10.9089	10.2337	10.6558	11.2053	10.8302	10.9412	10.0778	10.527	11.0663	8.5182	8.6531	8.9232	8.8135	8.5508	9.1928	9.0019	8.4266	8.9699	8.3372	8.3031	8.7101	9.2417	8.8036
	307	226922	ENSMUSG00000028033	Kcnq5	9.2431	8.9402	9.0543	8.9572	8.8676	9.3759	8.9243	9.1238	9.1186	9.062	9.1343	9.2248	9.2614	9.1922	9.0455	9.1919	9.6805	10.2667	9.8002	9.8088	10.1017	9.3311	10.3074	10.0282	10.1528	9.7154	10.4527	9.8316	10.0587	10.0048	9.5658	10.1693	10.7016	10.8678	10.8718	10.5648	10.784	10.654	10.5386	10.6785	10.0885	10.5796	10.2892	10.6614	10.6571
	308	26938	ENSMUSG00000039037	St6galnac5	7.2515	7.8187	8.0124	8.5082	8.2374	8.0086	7.8603	7.8216	8.2462	8.1825	8.084	8.1141	7.9367	8.1947	7.9929	8.2651	10.3283	10.1756	10.3679	10.2451	10.0045	10.1829	9.8768	9.9067	9.8689	9.9245	10.5123	10.1082	10.0505	10.1228	9.9442	11.0046	11.1194	11.2229	11.3042	11.206	11.1728	11.0772	11.1069	11.1284	11.1159	11.1844	10.9124	11.2248	11.0797
	309	11826	ENSMUSG00000004655	Aqp1	2	3.696	2.2739	2	2.7057	2.5956	3.9892	2	2.7091	3.7246	2.9044	2.487	2.9834	3.4154	3.9501	3.2587	4.5329	4.0739	3.3651	3.7602	3.9539	3.6764	4.9484	2	2.7876	5.0952	2	3.6666	4.1833	2.334	3.1926	4.3219	4.8123	3.5879	3.4583	6.2288	9.0597	2.6052	4.5205	3.1988	4.3837	3.9848	8.6151	6.9202	3.6105
	310	380728	ENSMUSG00000035355	Kcnh4	5.6476	6.6323	5.5176	5.3421	6.2465	6.6744	6.3083	6.3918	6.0944	5.8197	5.6909	5.9501	6.1648	6.4305	4.8805	5.8311	8.3583	8.062	7.7951	7.5955	7.6582	7.9141	7.755	8.2112	8.2163	7.9614	7.7582	8.0631	8.1462	8.278	7.9706	5.4882	5.5339	5.589	5.639	4.6334	4.5498	5.1404	5.2759	5.6621	5.8639	5.7958	5.1091	6.1242	5.6309
	311	100125263			5.02	4.2987	5.4082	4.8266	4.9307	4.6115	4.3104	4.1267	4.1328	4.7385	4.6394	3.9302	3.5627	4.1159	4.3609	4.2721	4.1439	2.8501	2.7052	2.8446	2.7126	4.0488	2	2	2	3.2719	3.9824	3.3524	3.4704	3.625	3.4853	3.2223	2.7236	2	3.1145	2.4858	2.8049	2.8333	2	4.3813	2.38	2.5085	2.5625	2	2.9512
	312	217682	ENSMUSG00000066438	Plekhd1	6.296	6.441	6.3535	6.3692	6.6241	6.554	6.551	6.9585	7.0516	6.5879	6.3139	6.2533	6.9525	6.3144	6.8098	6.2561	6.6203	5.7909	5.954	5.7372	5.7839	6.2391	5.4697	6.353	5.7771	6.6604	5.7197	5.7133	6.1036	6.4998	5.8957	8.1497	6.7224	6.233	6.4058	6.2693	6.1695	6.2063	5.8765	6.3527	6.3636	6.5482	6.5342	6.144	6.044
	313	229357	ENSMUSG00000043441	Gpr149	8.0686	7.7677	7.8701	8.27	7.2683	8.2013	7.8439	7.3936	7.5779	7.6874	7.9275	8.0279	8.1436	7.8732	8.0701	7.9689	4.1439	5.297	5.1505	5.2259	4.6846	5.5052	4.2427	2.3491	5.6155	5.383	4.9337	4.4194	4.4735	5.0969	4.4927	4.1876	4.1959	3.8105	4.6424	4.398	4.3529	3.951	4.4528	3.8443	3.8922	3.8219	4.2673	4.8559	3.8535
	314	100034748	ENSMUSG00000025727	A930017K11Rik	5.9993	5.1891	3.4181	3.0759	4.4374	3.6062	3.4061	3.729	4.7918	4.6186	4.4981	4.2061	4.0898	4.0529	3.3735	4.8615	4.0277	4.0739	3.6809	2.4833	3.1874	2.7027	2.4576	3.902	4.7676	5.2463	4.3386	3.6666	3.0086	3.4976	3.0204	5.1699	4.5164	3.1724	4.2296	3.7087	3.9265	3.7421	4.8713	4.4683	4.0048	4.4978	3.5396	4.6228	4.802
	315	100102	ENSMUSG00000044254	Pcsk9	4.4887	3.5656	4.1193	3.8044	4.4374	4.3474	4.1044	4.4931	4.0615	4.488	4.2563	3.1406	4.0898	3.987	4.6068	3.2587	7.8606	8.7781	7.302	7.9233	6.9845	5.7265	7.8327	7.8767	8.3378	7.4333	8.3009	8.2336	8.2409	8.188	7.2874	2.7369	2.7236	2	2.979	3.4515	3.2062	3.0302	3.0376	3.9689	3.141	2.5085	2.5625	3.604	3.2059
	316	18387	ENSMUSG00000025905	Oprk1	8.7166	8.6736	8.963	9.1858	8.707	8.725	8.7715	8.416	8.8302	8.6197	8.9933	9.2013	9.15	9.1382	8.9816	8.8741	6.8936	7.2295	7.6667	6.7261	7.2004	7.7887	7.1433	7.3467	7.7259	7.1468	7.5694	7.1988	7.579	6.9884	6.7532	4.6114	4.6346	5.2134	5.1323	4.5036	4.6817	5.0525	4.1446	4.8386	4.7496	4.3856	3.9489	4.8796	3.7769
	317	103988	ENSMUSG00000041798	Gck	8.6792	8.7877	8.7129	8.8154	8.9692	8.8324	8.7137	8.8383	8.4555	8.63	8.1386	8.4878	8.448	8.4143	8.2377	8.1425	5.6969	4.8915	6.1965	5.6019	4.365	7.0717	4.2427	4.1886	6.487	6.0904	5.4543	6.1006	5.1445	6.01	6.6238	5.1699	4.8454	5.1738	4.1049	4.9646	4.4047	5.0525	5.1953	5.2845	4.8734	4.9164	4.8476	5.7654	5.2612
	318	67405	ENSMUSG00000019890	Nts	8.8085	8.3855	9.0543	8.3058	8.1311	8.1399	8.5404	8.3542	9.101	8.3486	8.5091	9.0257	8.8976	9.0801	8.8839	8.8438	7.718	7.6193	7.928	7.8555	8.1485	7.687	8.0515	7.2771	8.1366	7.8713	7.7874	7.823	6.9939	7.3342	7.0279	6.6438	6.9059	7.0595	6.2817	6.892	6.6915	6.7855	6.6861	6.5045	7.2617	6.8734	5.7942	6.8378	6.4657
	319	20269	ENSMUSG00000057182	Scn3a	10.8063	10.5914	10.7848	11.1589	10.5157	10.7966	10.5209	10.8441	10.7401	10.5054	10.5751	10.8417	10.8695	10.8422	10.7405	10.8616	10.1224	10.2686	10.0693	10.1872	10.0487	10.0662	10.0855	9.9505	10.083	9.7474	10.2837	9.9792	9.9829	10.2652	10.1238	9.7878	10.1595	10.2272	10.0839	10.2571	9.7205	10.0903	10.1401	10.0084	9.9565	10.1916	9.8416	9.9539	10.1095
	320	22776	ENSMUSG00000002266	Zim1	9.4154	9.168	9.2394	9.6727	8.9979	9.5785	9.2587	9.6789	9.4136	9.2916	9.1402	9.3928	9.5315	9.3948	9.3085	9.3995	7.6703	5.9862	7.7366	6.7897	7.712	8.3118	7.2603	7.5792	7.3427	7.1275	7.6669	7.445	7.1866	6.8648	7.879	5.3692	5.9833	6.4961	5.7473	5.8691	5.9075	5.4806	6.0003	5.6621	5.1915	5.5316	5.224	4.7823	5.5412
	321	72693	ENSMUSG00000036699	Zcchc12	13.0855	13.0641	13.0633	13.2258	12.9517	13.0087	12.9191	13.0122	12.958	12.9553	13.0403	13.0799	13.0282	13.0995	13.0063	13.161	11.3557	11.4905	11.7752	11.6496	11.7037	11.8292	11.7081	11.2306	11.7762	11.7726	11.8391	11.7622	11.3054	11.6083	11.7794	9.2531	9.5638	9.8214	9.6844	9.4547	9.6843	9.8972	9.4115	9.7724	9.4072	9.4221	9.381	9.8285	9.3786
	322	12695	ENSMUSG00000061859	Patj	9.7111	9.4912	9.6227	9.5372	9.6306	9.5473	9.4424	9.6383	9.6943	9.7278	9.8047	9.5891	9.4877	9.6315	10.0101	9.6452	7.6009	7.5835	7.5258	7.6073	7.4736	7.6603	8.0836	6.972	7.6549	8.0768	7.4405	7.791	7.1765	7.2964	7.6246	9.3168	6.9896	6.8869	7.0033	7.1524	7.3028	7.2281	7.0027	6.8012	6.5971	6.9641	8.3543	6.9872	6.772
	323	333564	ENSMUSG00000033737	Fndc3c1	6.3649	6.5993	7.1151	6.8429	6.6605	6.4898	7.3668	6.2394	6.8962	6.7583	6.8383	6.1591	6.8422	7.163	6.5208	4.7162	2	2.8501	2	2	2	2	2	2	2	2	2	2	2	2	2.3301	2	2	2	2	2.1807	2.4579	2	2	2	2	2	2	2	2
	324	68725	ENSMUSG00000046999	1110032F04Rik	7.5761	7.5522	7.3842	7.8176	7.668	7.3348	7.4122	6.3918	7.8024	7.5412	7.5959	7.7658	7.5013	7.7295	7.8727	7.5852	6.9899	6.921	6.6593	7.5224	7.309	6.8852	7.3423	6.7405	7.5015	7.2398	7.698	7.2818	7.7583	7.2279	7.3433	8.037	7.9668	8.1541	7.8748	7.9066	8.0645	7.8401	7.7803	7.8499	8.5928	7.9507	7.8091	7.8668	7.6891
	325	22754	ENSMUSG00000031374	Zfp92	9.0703	9.0418	9.4122	9.4508	9.1816	9.2937	9.2649	9.2288	9.3477	9.2265	9.3346	9.5118	9.5716	9.4231	9.2673	9.2491	7.3698	6.5529	6.4671	6.7261	6.8311	6.598	6.7418	6.6801	6.4395	7.2577	7.157	7.0169	6.6164	6.3965	6.6238	5.3057	5.9833	5.9583	5.9238	6.1765	6.4039	6.5001	5.9764	6.2582	6.006	5.9016	6.4264	6.1242	6.1078
	326	20606	ENSMUSG00000047904	Sstr2	7.0818	7.3191	7.3551	7.4297	6.9962	7.523	7.3435	6.9389	7.2571	7.2229	7.3092	6.9964	7.2154	7.1175	7.0225	7.3219	8.6851	8.3866	8.385	8.5684	8.0337	8.1234	8.4092	8.5682	8.5086	7.83	8.7046	8.8992	8.5405	8.3162	7.9102	6.6179	6.4381	7.0487	7.1991	6.8985	7.3163	7.3344	7.3108	7.2933	6.4457	7.1212	6.2019	6.9818	7.0492
	327	14804	ENSMUSG00000071424	Grid2	7.751	8.8094	8.4589	8.8813	8.5311	8.8833	8.5906	9.1325	8.566	8.7298	8.5589	8.8461	8.6107	8.6239	8.7453	8.7063	7.0655	7.3479	7.267	7.6073	7.2856	7.4996	7.6939	7.2462	7.2075	7.7627	7.6458	7.2702	7.0719	7.4505	7.1268	8.6518	6.9673	6.8497	6.9039	7.0162	6.9399	7.4763	6.9173	6.75	7.0936	7.0309	6.9888	6.6981	6.4899
	328	19132	ENSMUSG00000023484	Prph	8.5638	8.7431	8.2449	7.7524	8.6492	8.2982	8.6676	8.4752	8.226	8.3265	8.5365	7.9828	8.2829	8.1764	8.0564	7.8778	6.2047	3.3814	4.9296	4.3159	4.7546	4.7994	5.0166	6.4283	3.4934	2	5.0667	5.3233	5.7163	4.6348	5.2842	4.3846	4.3877	4.0033	4.9985	4.8887	4.9139	5.6399	4.9223	5.133	5.2384	4.264	4.8947	5.0975	3.9261
	329	240672			4.6739	3.696	5.5176	5.2187	5.3873	4.6115	4.3104	4.1946	4.5526	4.8132	4.0692	4.637	5.1402	4.0529	4.5294	4.3726	4.7683	6.0575	5.9244	5.8998	5.9119	4.2525	6.1836	6.7984	6.5101	6.7767	6.5549	5.7133	6.0605	5.9383	5.7379	8.1497	7.6108	7.8991	7.9218	7.5882	7.8098	7.3529	7.7095	7.921	7.7638	7.8111	7.6607	7.6322	7.7353
	330	268934	ENSMUSG00000063239	Grm4	9.1985	8.917	9.1187	8.8505	9.1941	8.7797	8.8684	9.2227	8.8302	9.2685	8.8553	8.8858	8.6155	8.87	9.0103	9.1178	8.1308	7.5591	7.8275	7.9327	7.9467	7.5487	7.586	6.8811	7.803	8.6273	8.1214	8.1913	7.9535	7.7932	8.0057	9.7688	7.6156	7.7047	7.3021	7.7686	7.7103	7.5179	7.6801	7.5139	7.6559	7.3773	8.0973	7.5606	7.7801
	331	20725	ENSMUSG00000026315	Serpinb8	2	3.0841	2	2	2	2.5956	3.5754	2	2.2769	2.4379	2.368	2.487	2	3.9179	3.3735	2.4311	6.8081	6.716	6.5076	5.7796	6.0573	6.7903	5.814	5.9293	5.5274	5.7547	5.7983	5.8439	6.6164	6.1004	6.7939	5.4882	5.5339	5.732	5.4974	5.8822	5.446	5.6399	5.6532	5.6621	5.2384	5.6333	6.164	5.4853	5.5178
	332	242274	ENSMUSG00000028176	Lrrc7	8.3114	8.5497	8.5389	8.5386	8.8079	8.6013	8.6629	8.6696	8.7012	8.4891	8.6742	8.5694	8.658	8.6294	9.0032	8.3842	10.751	10.5585	10.3871	10.2299	10.5786	10.0216	10.5975	10.064	9.9974	10.0847	10.3586	10.1131	10.2932	10.1335	10.1051	10.0702	10.4768	10.3564	10.3047	10.3438	10.3311	10.194	10.2774	10.3102	9.9704	10.089	10.0661	10.3303	10.2093
	333	330096	ENSMUSG00000050010	Shisa3	2	3.5656	2.8767	3.0759	4.4374	4.8347	2.7312	4.6941	3.0413	3.3761	3.1126	3.5887	3.2034	3.3115	4.5294	3.0319	2	4.2053	3.3651	4.3159	4.4518	3.1732	5.3691	5.021	3.8245	4.1818	3.8409	4.038	4.0129	2.8332	2.5986	3.078	2.7236	3.3246	3.6491	3.1382	3.0844	2.6052	2.3371	2.9793	2.38	2.5085	3.4162	2.4436	2.8047
	334	66106	ENSMUSG00000041476	Smpx	2	2	2	2	2	2.5956	2.4115	2	2.2769	2	3.1126	2	2.7237	2.2452	2.7105	2	2	2.8501	2.9602	2.8446	2	2	2	2	3.0631	3.1237	2	2	2	2	2.8249	4.1876	2.4067	2	2	2.6171	2	2	2	2	2	2	2	2	2
	335	329078			2.9716	4.0286	4.5891	4.2019	4.8697	4.9345	4.573	3.9014	3.9073	4.5328	4.1658	4.637	3.8502	4.6718	4.8805	4.7162	6.7543	6.6483	6.7466	6.1139	6.5457	6.3093	6.6157	6.2321	6.0225	6.346	6.4853	6.2014	6.4426	6.206	5.8957	7.3098	7.4319	7.154	7.5965	7.3063	7.2184	7.1561	7.4989	7.3856	7.3708	7.3021	7.6876	7.1374	7.6086
	336	17201	ENSMUSG00000038537	Mc3r	6.7103	7.0653	7.2949	6.7569	7.208	6.6155	6.971	6.9389	6.8859	7.1163	7.4211	6.9964	7.3482	6.7112	7.1048	6.7977	4.6941	4.6362	4.9296	4.3159	4.6846	4.5126	3.6959	2	5.1681	4.3908	3.9824	4.9115	3.7123	4.6348	4.3544	2.9175	2.5738	2.8092	2	2.7375	3.2062	2.3341	2	2.4047	2.38	2.5085	3.4162	2.5656	2.2469
	337	623230	ENSMUSG00000070720	Tmem200b	2.9716	4.5946	4.4852	4.8818	3.9408	5.1982	5.0463	4.1267	4.7918	4.8132	4.4219	5.0406	4.2952	4.4452	4.6068	4.1642	5.3551	5.4637	5.1505	5.3991	5.4879	5.8881	5.0166	3.5441	6.3652	5.5375	4.2293	5.4517	5.9468	6.1436	4.7348	6.5235	4.8454	4.3254	4.8509	4.8624	4.5951	5.1824	4.4528	4.9637	4.7496	4.9164	5.3972	4.903	4.7226
	338	104582	ENSMUSG00000046215	Rprml	6.9172	7.0531	6.5972	6.4074	7.668	6.838	7.045	5.7231	6.976	6.8498	6.763	6.7603	6.8585	6.8474	6.0245	6.4752	10.1224	9.953	9.9101	10.3385	9.8394	9.4981	9.7624	9.5855	10.5867	10.268	10.3357	10.126	10.2423	10.0423	10.1812	10.2088	10.111	10.0758	10.2496	10.1357	10.3812	9.9874	10.2639	10.3551	10.5575	10.3981	10.0903	10.2243	10.3464
	339	330319	ENSMUSG00000086040	Wipf3	8.6014	8.479	8.8128	8.7239	8.6672	8.8453	8.852	8.8383	8.6535	8.8455	8.8407	8.7308	8.8372	8.7056	8.7062	8.6673	11.7607	11.9851	11.7023	11.7748	11.7989	11.4738	12.064	11.9565	11.8484	11.838	12.3606	11.9811	11.9626	11.9947	11.8498	13.3552	13.4718	13.4574	13.3439	13.5807	13.509	13.3488	13.6823	13.4904	13.4845	13.7134	13.567	13.344	13.6157
	340	18530	ENSMUSG00000036422	Pcdh8	10.253	10.4157	9.9352	9.7929	10.3924	10.1506	10.0428	9.7928	9.7661	10.0018	10.0726	9.9137	9.9927	9.89	9.8462	9.9062	11.2519	10.5415	11.2231	11.1589	10.7208	10.8719	10.8506	10.5672	10.887	10.9417	11.0974	10.9781	10.8429	10.9329	10.7607	10.5073	10.5786	10.745	10.8878	10.594	10.9109	10.468	10.7969	10.7366	10.6273	10.8205	10.6612	10.358	10.7835
	341	76206	ENSMUSG00000031210	Gpr165	10.2809	10.4588	10.6982	10.4107	10.3761	10.6186	10.4627	10.2982	10.5225	10.4891	10.5462	10.8252	10.7036	10.7352	10.5331	10.7318	7.621	7.4574	8.3408	8.0927	7.6119	8.5036	8.0269	6.9077	8.1216	8.3133	8.5081	8.4074	7.7784	8.0643	8.0229	6.2976	6.5823	6.7185	6.7141	6.3844	6.454	6.2661	6.2798	6.4838	6.3423	6.0001	6.2747	6.6016	6.4034
	342	246086	ENSMUSG00000045518	Onecut3	7.2515	6.8856	6.9493	4.5816	7.1191	7.097	6.6866	6.4062	6.8962	6.6905	6.5824	6.529	6.6683	6.6054	6.5987	6.6252	2	2	2	2.4833	2	2	3.084	2	2	2	2	2	2	2	2	2.5305	2	2	2	2	2	2	2.3371	2	2	2	2	2	2
	343	240776	ENSMUSG00000052726	Kcnt2	7.266	7.3191	7.4887	7.5709	7.2324	7.9502	7.3897	6.9971	7.3941	7.4909	7.5519	7.4715	7.4698	7.7445	7.9341	7.8864	7.5172	7.9634	7.6396	7.5715	6.8789	7.7805	7.8883	7.3173	7.3034	7.2488	7.9683	7.6463	8.0937	7.9655	8.0843	8.5042	8.9207	9.0758	8.5816	8.9655	8.7043	9.0193	8.9746	8.6359	8.5093	8.6391	8.5358	8.5077	8.7743
	344	11440	ENSMUSG00000031491	Chrna6	5.7124	6.7571	6.1646	7.0258	5.2976	6.8636	8.1423	7.2333	7.9078	6.5226	7.835	6.9964	7.6676	8.2272	7.5393	6.5628	2	2.8501	3.3651	3.7602	2	2.7027	2	2	3.2942	3.6426	2	3.1652	3.7123	2	2.5986	3.3536	2	2	3.1145	2	2	2	2	2	2	2.2765	3.6533	2	2
	345	70530	ENSMUSG00000040490	Lrfn2	8.8209	8.7393	8.6512	8.1514	8.6717	8.8063	8.5657	8.1598	8.4024	8.5229	8.5544	8.4748	8.644	8.5142	8.4363	8.1776	9.0663	8.8551	9.0628	8.9444	8.9537	9.0866	8.8576	8.4331	9.3706	8.6478	9.1824	8.7656	9.1591	9.2266	9.0819	8.5391	8.6272	9.0267	8.9121	9.0522	8.9957	8.555	9.0681	8.7489	8.6502	8.983	8.4557	8.8454	8.9931
	346	20980	ENSMUSG00000026452	Syt2	9.1466	9.2865	9.1989	8.9637	9.6167	9.1137	9.1556	9.173	9.4733	9.3864	9.2155	9.3437	9.2084	9.194	9.3956	9.4635	5.9413	7.2295	6.4464	6.9281	6.6776	6.0876	7.0489	6.0294	7.6959	7.7752	6.8961	6.7095	6.8494	6.3604	6.2478	9.5824	8.6008	8.2617	7.7079	8.7137	8.332	8.0757	8.5329	8.3569	7.9927	8.0506	7.7592	8.0686	8.2734
	347	239250	ENSMUSG00000045871	Slitrk6	7.6879	7.4996	8.0171	8.0464	7.7799	7.3886	7.4884	8.2058	8.2662	7.8602	7.8496	8.2111	8.2338	7.9443	8.6479	8.1845	4.1439	5.0397	4.518	4.8009	4.9461	4.7994	5.0816	2	5.5274	3.8455	5.4543	4.5779	4.8221	5.1822	5.2456	3.9593	3.6399	3.4622	3.1145	4.8357	3.9957	4.1334	3.5072	4.4683	4.6141	4.6019	5.9581	3.5459	3.9261
	348	18504	ENSMUSG00000004231	Pax2	4.8763	3.2631	3.5268	2	3.6818	3.3411	3.4061	2	2.8848	2	2.9044	2.487	2.7237	3.3115	3.1845	2.4311	2	3.14	2.7052	2.4833	2	3.5274	2	5.1151	3.2942	2.9585	3.075	2	3.3322	2.334	2.8249	4.3846	3.2032	2.3228	2	2.7375	3.0844	4.1334	2.3371	3.8443	2.929	2.7083	3.1322	3.3561	3.4223
	349	13395	ENSMUSG00000029755	Dlx5	6.3916	6.5826	6.4939	7.0976	6.6784	6.6452	6.6301	6.3772	6.3702	6.294	6.4351	6.3128	6.2659	6.5494	6.2584	6.0592	6.5796	5.6596	6.3381	6.2708	6.6776	6.7233	6.8391	5.4402	7.2631	6.7516	6.1676	5.9346	6.571	5.9865	6.5306	5.5165	6.1381	6.4799	5.8284	5.0829	6.1844	6.2063	5.2362	6.1307	6.4256	5.7052	5.7692	6.0941	5.5178
	350	72330	ENSMUSG00000074001	Klhl40	5.02	5.0976	4.7768	2	4.5963	3.016	4.4907	3.5331	4.6531	4.2398	4.9418	4.5407	4.3879	4.0529	4.3609	3.9206	6.0644	6.6938	5.5111	6.3574	6.0848	4.5898	5.7353	5.7353	6.5101	6.9627	6.1071	5.7471	6.0605	6.01	6.038	6.3138	6.3487	6.5278	6.6486	6.6061	6.4039	6.4664	6.9667	6.8178	6.4457	6.7655	6.5636	6.6644	6.7819
	351	107585	ENSMUSG00000075707	Dio3	3.7253	3.696	4.2519	3.0759	2	3.8301	2.4115	4.6464	3.3111	3.8716	2.9044	3.1406	3.7136	3.1996	2.3986	2.7625	8.9192	6.8015	8.1167	7.2021	6.7478	7.7556	6.9478	7.3173	5.8874	7.3523	6.5088	7.1236	7.4925	7.8201	6.934	5.8187	6.0557	7.0811	7.4048	5.9952	7.2542	7.1977	4.8184	7.3052	6.7341	6.0377	4.9843	7.339	5.9771
	352	238266	ENSMUSG00000044912	Syt16	9.3909	9.4957	9.5246	9.3466	9.2033	9.411	9.3636	9.093	9.4261	9.4404	9.4055	9.58	9.4152	9.5077	9.5333	9.4231	10.7186	10.5538	10.6348	10.6839	10.6061	10.5592	10.7764	10.4759	10.303	10.5714	10.8184	10.4327	10.8058	10.6575	10.6942	9.9625	10.0225	10.1592	10.0621	10.2833	10.0563	10.0123	10.0978	10.168	10.1692	10.1937	9.7583	10.182	9.9585
	353	11604	ENSMUSG00000005705	Agrp	6.7521	7.6358	7.8283	6.8148	7.6317	7.6161	8.0591	8.0723	7.158	7.6161	7.6302	6.5783	7.4804	6.6803	6.2822	7.4191	2.4243	2.8501	2	3.7602	2	4.9239	3.5192	2.3491	2.4469	2	2	3.3524	3.1795	3.625	3.3464	3.078	3.2032	3.7035	2.8293	3.1382	2.9514	3.0302	3.2117	2.7205	2.6805	3.1812	2.7784	2.7824	3.3182
	354	225659	ENSMUSG00000073542	Cep76	7.2221	6.9393	6.9395	7.1548	6.5287	7.2978	7.1015	7.3863	7.2965	6.6504	7.0301	6.8634	7.1374	7.1779	6.9201	7.1905	6.7904	7.0489	6.7466	6.8306	6.7649	6.7738	6.6801	7.204	6.6832	7.4721	7.1268	6.8405	7.2261	7.3154	6.6388	8.8314	7.0827	7.4719	7.2067	7.3541	7.1593	7.4159	7.4034	7.641	7.3708	7.37	7.5622	6.9373	7.136
	355	17896	ENSMUSG00000061086	Myl4	4.7583	5.4699	5.1268	5.5268	4.7395	5.1982	4.9874	5.5525	4.5526	4.9845	3.8541	4.5407	4.1962	4.7925	4.8168	4.5546	6.6203	6.0918	6.5275	7.3218	6.7817	6.215	6.5936	6.0294	6.7235	6.9736	6.9659	6.3843	7.2928	6.9402	6.5779	4.6114	4.6719	5.1332	5.3123	5.0131	5.2895	4.2954	5.0652	4.9637	5.0931	5.3641	4.2673	4.7823	4.9134
	356	214189	ENSMUSG00000021337	Scgn	5.5083	5.8797	5.6911	4.6468	5.8953	5.1982	5.7593	5.6281	5.4523	5.6261	5.1916	5.7918	5.8102	6.0005	5.8445	5.4723	4.2514	4.3257	4.805	4.0646	4.7546	2.957	4.3522	3.902	4.5161	4.3908	3.6842	5.026	3.3322	3.625	3.0204	4.4447	4.1959	4.8618	4.5011	4.6941	4.1249	4.7512	5.1099	3.9689	4.7496	4.3856	4.4036	4.6507	4.6386
	357	225642	ENSMUSG00000024517	Grp	5.5083	6.8299	5.6436	6.2897	6.9818	6.9377	6.1564	6.76	5.6598	6.5002	6.1105	6.2226	6.1383	6.5148	5.8761	6.4752	5.8416	6.6938	7.2788	7.3073	6.9551	6.9452	6.7215	6.8676	6.487	7.5099	7.768	6.7765	7.5325	7.1768	6.7114	7.9721	8.2303	8.5818	8.8357	8.1726	8.6081	8.559	7.7524	8.9436	8.6886	8.1484	7.3924	8.6016	7.9022
	358	238680	ENSMUSG00000033063	Cntnap3	7.1142	7.17	6.3971	6.0694	6.5676	6.554	6.7231	6.6554	6.7676	6.609	6.7784	6.9597	6.7048	6.7712	6.5007	6.9679	7.8521	6.8822	7.7281	7.6422	6.9402	7.4794	7.6624	7.1494	7.0264	7.2665	7.352	7.5729	7.2164	7.0002	7.3433	6.2309	7.0547	7.2331	6.5799	6.8659	6.7019	7.1456	6.5304	7.1819	7.0936	6.323	6.7794	6.9316	5.907
	359	382864			4.2178	2.6416	2	2	2	3.3411	2.9928	2	2.5092	2.7733	2.368	4.2061	2.4067	3.3115	2.9669	2	2	2.4868	2	3.1334	4.365	2	2	2	2	2.3055	2.453	2	3.3322	2	2.8249	4.3846	2.8592	2.8092	3.8949	3.1382	3.0844	2	3.367	3.708	3.8922	3.3097	2.5625	3.1375	3.3182
	360	23937	ENSMUSG00000057777	Mab21l2	5.5796	5.1891	6.3085	6.1616	6.1977	6.3878	5.6113	5.9947	5.3362	5.4961	5.5548	6.2533	5.5938	5.7848	5.6387	5.9658	2	3.14	2	3.3739	2.7126	2.957	2.4576	3.4019	4.5161	3.8455	2.453	2.6972	3.8196	2.8332	3.0204	3.4739	3.2032	3.5879	2.4734	2.8486	2.4579	3.2035	2	2	2.38	2.8837	2.3085	2	2.8047
	361	12555	ENSMUSG00000031962	Cdh15	6.861	6.8299	7.0437	5.3421	7.2203	6.1174	6.9089	6.0136	6.1122	6.6504	6.4351	6.9027	6.5529	6.3801	6.2822	5.8311	6.8081	5.8722	6.6228	5.9378	5.2665	6.6349	5.8518	6.1002	6.487	5.5375	6.5549	6.3843	6.3017	6.4318	6.188	7.3496	5.7588	5.7045	5.9238	5.8425	5.7761	5.7833	5.5916	5.133	5.4118	5.6577	5.1091	5.3561	6.044
	362	17536	ENSMUSG00000027210	Meis2	8.5755	8.3512	8.4416	8.67	8.1504	8.2506	8.3838	8.5122	8.6686	8.3919	8.448	9.0565	8.1032	8.2694	8.6661	9.0128	10.9526	11.0572	11.1296	10.9519	11.255	10.9968	11.2974	11.1221	11.3131	11.1655	11.002	10.8949	10.964	10.8424	10.8906	10.1137	10.0591	9.9381	9.8862	10.0497	9.7806	10.1081	9.8894	10.1218	10.2922	9.7875	9.9651	9.976	9.7541
	363	228942	ENSMUSG00000067578	Cbln4	9.9905	9.9393	9.894	9.6127	9.7601	9.8032	9.7091	9.9643	9.6957	9.6612	9.9744	10.0067	9.9014	9.8337	10.1492	10.0343	7.3579	7.8068	8.1745	7.7844	7.87	8.432	8.3109	7.2146	8.3507	8.7682	8.2247	8.1028	7.8872	7.9953	8.2396	7.5545	7.5865	8.2805	7.8163	8.253	7.5812	8.6739	7.5805	8.5236	8.1662	7.6864	7.7655	8.0634	7.0411
	364	54140	ENSMUSG00000020123	Avp	7.5467	6.991	7.1748	7.4016	7.4248	7.2009	7.1692	7.2652	7.3043	7.2091	7.1051	7.1182	7.4908	7.1852	7.2202	7.3834	4.445	2.4868	3.1768	3.7602	3.8298	2.7027	4.7223	4.2727	4.6049	4.3908	3.5082	3.518	3.7123	3.358	3.1926	3.078	2.7236	2	2.6623	3.1382	3.0844	3.2035	3.367	2.9793	2.38	3.3097	2.5625	4.3103	2.2469
	365	13396	ENSMUSG00000029754	Dlx6	7.1614	7.0409	7.1831	6.8705	6.8927	7.0752	6.8606	7.0802	6.4561	6.7296	6.7318	6.8634	6.5328	6.7415	6.3286	6.3077	5.493	6.5773	6.7295	6.682	7.2252	6.598	6.1836	6.6954	6.1161	6.4586	6.5088	6.1519	6.4087	6.6117	6.4816	4.8524	5.554	5.759	5.3123	5.1923	5.2617	5.3016	5.3146	5.6985	5.1915	5.1745	5.6373	5.7527	5.4941
	366	108071	ENSMUSG00000049583	Grm5	11.0617	11.1807	11.2074	11.4937	11.1138	11.4111	11.1647	11.1297	11.3846	11.036	11.2868	11.6925	11.4564	11.5543	11.5112	11.5135	12.0826	12.1753	12.2961	12.0965	12.0633	12.1043	12.259	12.0489	11.8937	11.9663	12.4158	11.8357	12.1351	11.9163	12.0941	12.1509	12.632	12.724	12.6504	12.6359	12.38	12.6536	12.4124	12.5079	12.4875	12.4539	12.3556	12.5471	12.3351
	367	16012	ENSMUSG00000023046	Igfbp6	6.2818	4.2141	4.4852	5.9962	4.3508	6.1174	4.573	4.0554	3.9864	5.2495	4.4219	4.637	3.975	6.503	4.6802	3.6273	9.3343	8.8451	8.9422	9.1644	8.4935	8.7123	8.6694	8.8846	9.2206	8.9107	8.9948	8.8955	9.2265	8.735	8.6695	7.8101	7.5267	7.7458	7.8262	7.6471	7.7509	7.6436	7.3671	7.9055	8.1169	7.4833	7.3509	7.4181	7.3293
	368	105243	ENSMUSG00000036123	Slc9a3	3.3435	4.2987	4.6384	4.2019	4.8061	2.5956	3.7269	5.4169	3.8235	4.4416	3.6013	3.7695	3.8502	3.5122	4.3609	3.0319	2	2	3.5316	3.1334	2	3.3611	2	2	4.3203	2.9585	2.453	2	2	3.625	3.0204	4.7126	3.7833	3.1724	4.3444	3.7665	3.2062	4.0451	3.9617	4.0836	3.6366	4.0598	2.9661	3.6599	3.4223
	369	195646	ENSMUSG00000046321	Hs3st2	6.2087	6.5826	6.3681	5.4557	6.8618	7.1394	6.1294	6.1047	6.3553	6.7583	6.716	6.0584	6.1907	6.4792	6.2342	6.7795	7.8349	8.7461	8.218	8.838	8.3198	7.4794	8.3836	8.3041	8.9298	8.2432	8.6042	8.6319	8.8688	8.2585	8.6804	7.3098	7.3989	7.2137	7.6477	7.4931	7.9515	7.5742	7.4476	7.7492	7.8033	7.5036	6.7284	7.6426	7.1513
	370	12931	ENSMUSG00000007888	Crlf1	5.6695	4.3785	4.2519	2.3528	4.9307	3.3411	5.5718	4.546	4.6038	4.9845	4.9953	4.2061	4.475	4.6293	4.17	4.1642	5.7711	5.8722	5.2494	6.2408	5.7839	5.2906	6.2698	5.9293	6.533	5.9653	5.0667	5.7471	6.4758	5.2627	5.4963	9.0528	8.9944	9.2284	8.9825	9.201	8.8884	8.8537	9.1639	9.0176	9.0778	9.415	8.8804	8.7246	9.409
	371	13488	ENSMUSG00000021478	Drd1	6.6782	6.5311	6.7052	7.411	6.6784	6.7585	6.705	6.3023	7.1918	6.8849	6.716	6.6722	7.0968	7.1779	6.9201	7.0761	8.6114	8.835	8.1745	8.4019	8.9904	7.9944	8.7715	8.1233	9.0173	8.6204	9.0073	8.4283	8.56	8.5588	8.3068	6.4373	6.6305	6.7987	6.3792	6.7703	6.4292	7.1666	6.4972	6.6605	6.7341	6.44	6.6483	6.4593	6.4161
	372	20513	ENSMUSG00000005357	Slc1a6	8.9318	9.1651	9.1078	9.0656	9.4883	8.8957	9.1456	8.4786	8.8436	8.8958	8.96	8.841	8.7173	8.937	8.9816	8.8996	8.1793	7.7648	8.2057	8.0672	7.9241	8.2298	7.87	6.9969	7.9027	7.9504	8.5197	8.0154	8.1616	7.8723	8.2099	8.655	7.3246	7.5512	7.3092	6.9801	7.6036	7.2079	7.4989	6.9746	7.2273	7.5434	7.1232	7.414	7.0814
	373	381232			2	2.8797	2.2739	2	2.3956	2	2.7312	2	2.2769	3.4714	2.368	2.487	2.4067	2.9458	2.9669	2	6.3808	3.9294	6.1715	5.6484	5.4879	6.3543	5.6943	5.0688	5.1681	5.677	5.9437	5.6433	5.2633	6.5962	5.9447	6.4225	6.7401	6.4961	6.1616	6.4208	6.6384	6.9767	6.4972	6.2085	6.874	6.4116	6.2747	6.8378	6.5136
	374	319752			10.1736	9.9026	10.2594	10.6454	10.1302	10.087	9.8478	10.123	10.241	9.9207	10.2675	10.564	10.3887	10.5052	10.4542	10.6591	9.6781	9.9945	10.1322	9.8885	10.1495	10.3266	10.198	9.8616	9.926	9.9146	10.2298	9.7917	10.0642	9.9617	9.9622	9.1372	9.4516	9.6283	9.3656	9.498	9.002	9.635	9.1639	9.1843	9.1803	9.3152	9.3284	9.493	9.2429
	375	432763	ENSMUSG00000034686	Prr7	8.9831	8.8202	8.3814	8.5299	9.1721	8.9142	8.6392	8.7395	8.0757	8.431	8.4859	8.0368	8.5164	8.307	8.3262	8.408	9.8483	9.7339	9.8164	10.199	9.4699	9.5205	9.5859	9.63	10.2489	10.0232	10.0507	9.9432	10.1046	10.0004	9.9755	9.5672	9.6175	9.6572	9.6871	9.4819	9.7077	9.5831	9.5737	9.6613	9.9102	9.9761	9.3768	9.4988	9.5276
	376	229214	ENSMUSG00000058400	Qrfpr	6.689	7.0773	6.7282	6.8705	6.908	6.9377	6.1828	6.2394	6.2629	6.5226	6.3958	7.1348	6.8905	6.7514	6.6904	6.9679	6.9425	6.8015	6.4254	7.233	6.9551	6.1399	7.1585	6.8403	7.0102	5.8042	7.5238	6.856	6.8745	6.3786	6.6238	4.7607	4.3877	4.9107	4.5011	4.284	4.7231	5.863	4.3817	5.0223	4.6834	4.4978	4.2673	4.8559	4.6812
	377	76459	ENSMUSG00000032373	Car12	6.53	5.9855	6.1646	6.3884	5.9256	6.6155	5.794	6.1736	6.2629	5.5408	5.8447	5.3556	6.2413	6.0498	5.907	6.0287	9.5706	8.9518	9.5021	9.2686	8.6018	9.729	9.0405	8.9176	8.395	8.7619	8.6205	9.2507	8.5522	9.0926	9.314	9.276	9.4834	9.5338	9.626	9.6957	10.425	9.3814	9.498	9.4043	9.0119	9.2506	10.2054	9.6718	9.5493
	378	71355	ENSMUSG00000028197	Col24a1	6.0997	6.4957	5.464	5.561	5.8328	5.6141	6.1564	6.0869	6.5889	6.2809	6.2926	5.8331	6.7048	5.4354	6.1846	4.3726	6.0644	5.7909	6.6593	5.029	6.3785	7.0169	6.4775	6.601	7.4424	5.8985	6.3869	6.5076	6.7714	7.1872	6.6683	4.7126	4.0333	3.9101	3.9683	4.9646	4.4547	4.7512	4.0561	4.1898	4.6834	3.6382	4.4036	3.0565	3.7769
	379	13654	ENSMUSG00000037868	Egr2	3.7253	3.8156	2.504	4.2863	3.8171	3.3411	4.4034	2	2.7091	3.5609	3.2945	3.382	3.3942	3.7691	4.17	3.0319	6.2829	6.7594	6.9367	6.5412	6.2633	6.0334	6.4283	6.4645	6.7432	6.346	6.8227	6.6572	6.9591	6.4143	6.6087	3.078	4.8123	3.8105	3.8949	4.323	4.7633	5.7276	3.5072	5.2358	4.6141	4.4428	4.6426	4.6228	4.6812
	380	109349	ENSMUSG00000009216	Fam163b	9.6294	9.3768	9.6649	8.7868	9.642	9.3124	9.2273	9.7241	9.2387	9.5178	9.2239	9.3039	9.1367	9.1904	9.2673	9.4917	11.5571	11.8986	11.3131	11.7807	11.4527	10.8308	11.779	11.5208	11.5291	11.433	11.8268	11.8069	11.7853	11.7651	11.4504	11.8557	11.8374	11.8557	11.5628	12.0095	11.6214	11.5227	12.1867	11.8091	12.0257	12.1618	11.7561	11.4469	12.1446
	381	229949	ENSMUSG00000039058	Ak5	10.3274	10.3664	10.3702	10.0972	10.3843	10.3378	10.0518	10.1099	10.109	10.2878	10.3392	10.3339	10.3095	10.2028	10.2731	10.3575	12.461	12.0256	12.2509	12.3489	12.0838	11.9558	12.1466	12.0574	12.0222	11.9495	12.506	12.1333	12.2327	12.3207	12.1691	12.1733	12.434	12.5419	12.5723	12.4706	12.4728	12.3501	12.4892	12.4529	12.2656	12.5336	12.1833	12.4254	12.4652
	382	110648	ENSMUSG00000026686	Lmx1a	6.0165	7.0162	5.9472	7.1435	6.846	6.731	6.8769	6.5813	7.273	7.0638	7.222	7.1014	6.809	6.875	6.7934	7.3093	2	2	2	3.1334	3.694	2.7027	2	2	2.4469	2	2	4.038	2.3254	2	2.5986	3.9593	3.5625	3.3246	3.4583	4.1602	5.8527	3.7421	3.7523	2.9793	2.38	2.8837	5.5809	3.4222	3.7769
	383	56149	ENSMUSG00000000531	Grasp	7.1768	7.0773	6.3535	5.9962	6.9528	6.8887	6.7762	6.5813	6.7221	6.7677	6.7936	6.0928	6.5728	6.5608	6.7599	6.3576	10.5353	10.4434	9.9548	10.4947	10.095	9.4856	10.2071	10.0831	10.5126	9.9216	10.3699	10.4118	10.3013	10.2725	10.1786	9.8051	9.763	9.7203	9.8343	9.7531	9.7781	9.5889	9.7322	9.9224	10.0513	10.012	9.8189	9.8399	9.7886
	384	69993	ENSMUSG00000004633	Chn2	8.9431	9.1764	9.2533	9.3515	9.1878	9.1915	9.059	9.2186	9.3001	9.1547	9.2127	9.4634	9.1367	9.1995	9.3928	9.4377	8.5389	8.6105	9.0388	8.5502	8.9611	9.1485	8.6852	8.9847	9.1851	9.1523	8.6313	8.749	8.6716	8.6992	8.9167	10.3803	8.5263	8.299	8.381	8.4662	8.3253	8.8634	8.7531	8.5236	8.3796	8.4145	8.8419	8.5247	8.6021
	385	243312	ENSMUSG00000048988	Elfn1	8.8159	9.2204	9.1824	9.2396	9.3047	9.119	9.2711	9.1898	9.0162	9.2485	9.1985	9.1078	9.14	9.1775	8.907	9.2753	9.6925	9.7285	9.7899	9.7272	9.8514	9.4729	9.75	9.2174	10.1211	10.0543	10.2083	9.8414	9.5964	9.7855	9.6806	8.8482	8.9495	9.0072	9.0283	8.9485	9.2958	9.199	8.9594	9.1186	9.0746	8.9265	8.9006	8.9597	9.0713
	386	12808	ENSMUSG00000020173	Cobl	9.9574	9.9926	10.149	10.1417	10.1464	10.1218	10.0446	10.1176	10.0213	10.155	10.0773	10.1805	10.0559	10.2474	10.0796	10.0477	10.7905	11.0075	10.8243	10.7639	10.7436	10.3954	10.8541	10.6452	10.6701	10.4483	11.1385	10.6898	10.8952	10.5712	10.5333	8.5042	8.7931	8.8245	8.6076	9.0781	8.8351	9.1415	8.6281	8.8934	8.7824	8.3562	8.5903	8.6593	8.4032
	387	16891	ENSMUSG00000053846	Lipg	5.381	5.433	4.3138	4.8818	4.9307	4.4855	5.2601	4.381	4.9582	4.8132	4.3415	4.637	4.9096	4.2342	4.5294	3.2587	7.3817	8.0001	7.2432	7.6875	7.4839	6.6166	7.9064	7.7207	7.6234	7.0679	7.7778	7.7332	7.1765	7.2077	7.2391	4.9798	5.5135	5.3963	5.4974	5.1711	5.446	5.7833	5.5916	5.5863	5.1915	5.8602	5.2958	5.8991	5.7951
	388	22354	ENSMUSG00000032528	Vipr1	5.9282	5.1441	5.1268	5.4557	3.8171	5.4884	3.4061	5.2985	3.9864	4.1846	5.047	4.0747	4.9096	4.8305	4.7501	3.7814	8.9232	8.7078	8.4644	8.4221	8.6803	8.1807	8.1072	8.1624	8.7709	8.4244	7.9598	8.3861	8.5208	8.6956	8.5279	8.5998	8.6248	8.6482	8.546	8.6614	8.5746	8.6099	8.6396	8.3739	8.7301	8.748	8.1897	8.5508	8.531
	389	17260	ENSMUSG00000005583	Mef2c	8.6873	8.6775	8.9509	9.1994	8.8079	8.6754	8.8396	8.9333	9.0581	8.8894	8.884	9.1855	9.2052	9.1533	9.3085	8.7767	12.638	12.869	12.7437	12.7671	12.6051	12.4219	12.7114	12.6973	12.2522	12.4858	12.972	12.3944	13.0775	12.7271	12.6748	11.3075	11.5106	11.5865	11.1754	11.5266	10.9463	11.7843	11.3613	11.4846	11.3794	11.2968	11.3404	11.1911	11.0414
	390	68498	ENSMUSG00000030351	Tspan11	4.7583	4.8953	5.0193	4.8266	5.7675	5.6141	4.6509	3.0372	4.3874	4.7385	5.0968	4.8122	4.6348	5.6844	5.2131	4.5546	5.7345	5.297	4.988	6.046	6.0848	5.4231	4.8017	6.3722	5.1681	5.8284	5.2457	5.7801	6.1036	3.625	4.678	6.2478	4.4747	4.9107	5.1639	4.5699	5.6952	4.0451	4.6471	4.0836	5.0931	4.1311	5.0687	4.678	4.6386
	391	65971	ENSMUSG00000020096	Tbata	4.0269	2.6416	2.8767	2.3528	3.3659	4.0239	3.4061	3.3063	2.5092	3.0453	3.6013	3.5887	2.7237	3.6884	2.3986	3.6273	6.4274	5.297	5.626	5.7372	6.3105	6.215	5.9596	4.5674	4.8426	5.7292	6.0758	5.2308	5.3374	5.3757	5.7924	7.1108	7.3989	7.2897	7.4946	6.8052	7.0898	7.5584	7.3392	7.1161	7.0285	7.3021	7.2094	7.6322	7.3884
	392	320460	ENSMUSG00000045648	Vwc2l	8.7034	8.4699	8.7609	8.8012	8.6263	8.9019	8.6151	8.6845	8.6983	8.4748	8.9834	8.7948	8.7262	8.8608	8.8761	8.9614	6.6984	7.4705	7.3585	7.2928	7.4632	7.5584	7.87	7.3944	7.547	7.4644	7.9426	6.9748	7.468	7.0801	7.1161	7.6911	7.8777	7.887	7.1126	8.1483	7.1966	7.3251	7.2422	7.3744	7.7232	7.6198	7.5622	7.4302	6.9996
	393	232156	ENSMUSG00000068323	Slc4a5	2.8228	2	2.7024	2	2.7057	2	2	2	2.2769	2.4379	2.368	2	3.5627	2	2.9669	2	2	4.2053	2	3.9204	4.5337	2.7027	2	3.902	3.0631	3.9372	3.9824	3.6666	3.4704	2	2	4.6114	5.1664	4.5272	2.8293	7.2517	9.0877	2.3341	3.7523	2	4.2979	4.3261	8.8716	7.2417	4.4043
	394	14427	ENSMUSG00000024553	Galr1	7.1691	7.2676	7.1664	7.8033	7.0104	7.6605	7.1824	7.6142	6.9466	6.6905	7.0555	7.3771	7.0691	7.2914	7.437	7.5535	4.1439	4.6362	5.9244	6.1787	4.9461	6.2863	5.2608	3.5441	5.7383	5.4776	5.9087	5.6787	4.715	5.5781	5.9447	3.2223	3.3018	4.2514	3.4583	2.3413	3.6109	3.3581	2.8397	2.7205	2.6805	2.8837	2	2.678	2.8047
	395	100046763			6.2384	5.2327	5.3204	4.9864	6.0128	5.8876	5.3563	5.8337	5.9037	6.0838	5.047	5.7918	5.429	5.3063	5.8761	5.7211	7.2964	7.8872	7.1047	7.0017	6.9551	6.8065	7.4934	7.3173	7.3034	6.563	7.5122	7.2818	7.3831	7.0912	7.5153	5.1699	5.9071	5.3259	4.8893	5.2742	5.7761	5.9628	5.8238	5.7688	5.4118	5.2405	5.4295	5.1374	5.2039
	396	240690	ENSMUSG00000033740	St18	8.145	7.8043	7.7631	7.9847	7.7379	7.8257	8.0156	8.2222	7.9676	8.0185	7.6046	8.2798	8.1699	8.1653	7.9929	8.4315	6.1777	6.5027	6.1201	6.6595	6.2633	6.9886	5.9596	5.6116	6.3134	7.2488	6.1969	6.2957	5.874	5.8628	6.4649	9.4748	9.6506	9.6464	9.5109	9.5022	9.3645	9.6369	9.4092	9.1939	9.1652	9.3361	9.1043	9.4766	9.529
	397	12374	ENSMUSG00000051980	Casr	4.3323	5.852	5.9472	5.5945	6.3394	5.4211	5.8611	6.2868	4.9582	6.2809	5.4046	4.9684	5.9073	5.7848	5.996	5.866	6.5377	5.5152	6.9067	6.3574	6.7306	7.2127	6.3246	6.5344	6.3904	6.9518	7.142	6.6029	6.4593	6.7155	6.9461	2	2.8592	4.1733	2.4734	3.1382	3.5198	3.7421	2.8397	3.3892	2.929	2.8837	2.5625	2.9708	2.9512
	398	78923	ENSMUSG00000058152	Chsy3	7.5934	7.17	6.7282	6.7716	7.3148	7.474	6.9089	7.7331	7.2887	7.1163	6.7784	7.4584	7.3597	7.3967	7.2922	6.9354	7.4734	7.8068	8.0008	8.1585	7.5737	7.539	7.9153	7.2566	7.6549	7.6452	8.0509	7.3926	7.9594	8.0186	7.7745	7.0921	7.4853	7.0266	6.7971	7.3541	6.9831	7.2967	7.0607	7.1428	7.5392	7.1036	7.073	6.9763	7.0163
	399	14200	ENSMUSG00000008136	Fhl2	6.6997	6.8156	6.3971	6.2897	5.5516	6.2396	7.0158	6.9089	6.1811	6.2543	6.0099	5.8331	6.084	6.4305	6.0799	5.7211	8.7369	9.3952	9.0002	9.3017	8.994	8.4002	8.8806	8.9467	9.245	8.4827	9.4734	9.0988	9.5426	9.045	8.9798	8.8116	9.1094	8.9082	8.7209	9.0566	8.8065	8.9481	9.0539	8.9474	8.9984	9.3228	9.2628	9.0604	9.0409
	400	270152	ENSMUSG00000048534	Jaml	2	2.3562	2.8767	2	2.9608	2	2.4115	2	2.2769	2.2355	2	2	2	2.4547	2.7105	2.7625	3.7629	2.4868	3.1768	2.8446	2	2.957	2	2	2	2.3055	2	2.3903	2	2	2	3.3536	2.4067	3.0022	2.6623	3.048	2.247	3.6251	2.3371	3.3892	3.3258	2.7083	2.7784	2.5656	3.0842
	401	85030	ENSMUSG00000024793	Tnfrsf25	4.7987	4.5261	3.3006	4.4415	4.519	5.4211	4.3104	4.2594	4.1328	3.7246	3.9657	3.382	3.2034	3.4154	3.6904	3.2587	6.1222	6.2824	5.5111	5.4526	4.885	5.6564	5.4203	5.8765	5.8148	5.1727	5.2457	6.4472	5.7163	6.2462	6.2082	7.8771	7.8165	7.6409	8.1598	7.6924	7.9944	7.9955	8.0561	8.2443	8.0063	8.046	7.7075	8.0582	8.4956
	402	22065	ENSMUSG00000027716	Trpc3	7.8553	7.5522	8.1204	7.8033	7.7207	7.8386	7.5608	7.9351	7.6405	7.8602	7.7124	7.9363	7.7131	7.6677	7.8883	7.3093	7.4052	7.8273	7.1944	7.4845	6.2633	6.9304	6.8578	8.1176	7.2494	7.9504	7.3389	7.2585	7.9942	7.2772	7.8853	8.7474	7.0333	6.9584	6.5916	6.7561	6.5259	6.9527	6.4458	6.6419	6.9034	6.7766	7.2	6.9145	6.5939
	403	23934	ENSMUSG00000022577	Ly6h	12.1854	12.0468	12.1616	11.7721	12.2883	12.0012	11.902	11.8554	11.7452	11.7794	11.8817	11.6953	11.8297	11.7439	11.7479	11.8714	12.3314	11.5657	12.168	12.1132	11.8596	12.2652	11.5935	11.8268	12.1673	12.311	11.9308	11.9891	12.0409	12.1546	12.2104	11.044	11.2225	11.2223	11.4056	11.0935	11.4439	11.3754	10.8464	11.4206	11.4282	11.3208	10.7888	11.2639	11.0847
	404	22355	ENSMUSG00000011171	Vipr2	6.4561	6.4595	6.9687	6.4986	6.9818	6.9615	6.6107	5.7684	6.3848	7.1237	5.9019	6.6947	6.6118	6.6272	7.0225	6.3077	5.2027	5.0397	5.6624	5.4526	5.3592	5.3803	4.454	4.004	3.6684	4.8341	3.075	5.2308	5.1026	4.9095	3.8364	5.7489	3.6399	3.7035	4.0382	3.7665	3.7773	2.6052	3.5072	3.1988	3.77	2.8837	5.6646	3.5459	3.5195
	405	22409	ENSMUSG00000026167	Wnt10a	3.4488	4.0286	2.8767	3.254	4.5963	3.8301	4.4034	4.7403	4.4996	4.1846	3.456	4.0747	3.3942	4.2899	4.0642	4.7907	6.4274	6.3407	6.0669	6.5163	5.8809	6.0876	6.6157	6.7984	6.0543	6.1491	6.3351	6.1519	6.758	6.4143	6.038	6.3614	6.512	5.2134	6.2378	6.5579	6.0926	6.6868	6.1143	6.4628	5.9224	5.7512	6.0851	5.3729	6.169
	406	242202	ENSMUSG00000053965	Pde5a	5.9993	5.7656	6.1132	6.1838	5.3873	5.8369	5.2601	6.5296	5.8197	5.7261	6.2044	5.7494	5.7416	6.7214	6.4596	6.5414	6.86	7.3479	6.6043	7.5099	7.7553	7.973	7.6517	7.3563	7.0424	6.7389	7.0486	6.8405	7.4597	7.4157	7.0837	8.6895	8.0038	8.2235	7.6809	7.9694	7.8049	7.8136	7.794	7.5442	7.5485	7.8954	8.2361	7.6322	7.5115
	407	78603			5.02	6.4595	6.3681	6.4074	5.8953	6.2781	6.2088	6.9487	6.3099	5.8015	6.4543	5.7918	6.2659	6.0498	6.5208	6.7977	7.1513	7.39	7.2552	7.5349	7.2617	6.9886	6.701	7.6359	6.5775	6.5915	7.0961	7.1364	7.1459	6.8123	7.2093	5.0198	5.7236	6.2136	5.9053	5.9209	5.6529	5.8369	5.1099	5.8026	6.0849	5.6086	5.8901	5.9671	5.47
	408	320297			2	2	2	2	2	2	2.4115	2	2	2.4379	2.661	2.8505	2	2.6376	2.9669	2	2	3.14	2	3.5799	3.1874	2	3.5192	4.6948	3.9653	4.0234	3.3078	3.3524	4.4735	2	3.1926	2.9175	3.2032	3.1724	3.1145	2.7375	3.2062	2.8333	2.8397	2	3.77	2.2765	2.9661	2.4436	2.8047
	409	232345	ENSMUSG00000030111	A2m	8.0972	8.3562	7.9745	8.0823	8.1048	7.8126	9.0554	8.4989	8.5	8.8544	8.6742	8.5197	8.6857	8.3826	8.1369	8.1914	6.9743	8.2714	6.9515	7.3218	7.4942	7.4996	8.4712	8.8091	7.6019	9.0912	7.3906	8.0564	7.4091	7.2577	7.7745	8.0124	6.8337	6.7987	6.2817	7.5353	8.9745	7.058	7.1165	6.623	6.9743	7.1644	9.0483	8.161	7.0972
	410	16826	ENSMUSG00000039706	Ldb2	9.3387	9.1708	9.4678	9.2762	8.9872	9.3936	9.3106	8.841	9.1491	9.2127	9.0418	9.4065	9.4343	9.2859	9.4091	9.4435	9.2525	9.4525	9.8042	9.4137	9.302	9.6988	9.5345	9.2201	9.3926	9.6576	9.9744	9.2478	9.7552	9.4834	9.3912	9.374	9.5069	9.3531	9.4433	9.4236	9.3759	9.4603	9.051	9.3765	9.7818	9.2263	9.0007	9.4452	9.1301
	411	15560	ENSMUSG00000041380	Htr2c	10.7261	10.6429	10.6267	10.967	10.6165	10.5196	10.43	10.6431	10.8925	10.6645	10.8313	11.1385	10.8194	10.9633	11.0538	10.925	10.9948	11.0041	11.2132	11.0612	11.0668	10.7925	11.1084	10.4858	11.0089	11.0464	11.5633	11.0054	11.0185	10.9603	10.8709	8.9936	9.3255	9.4882	9.4091	9.7459	10.4901	9.5352	8.916	9.3793	9.5898	9.1273	10.1984	9.8911	8.9696
	412	666048	ENSMUSG00000070867	Trabd2b	4.9854	3.2631	4.7768	5.0359	3.3659	5.0279	4.795	4.7403	3.9864	4.6597	4.2563	4.2061	2.7237	5.6422	3.3735	4.3726	7.7641	7.0663	6.6412	7.4716	6.5457	7.899	6.8202	7.4587	6.0855	6.9071	5.1884	7.0845	7.2551	6.6571	6.6971	6.9015	6.7834	6.9231	6.2229	6.566	6.4783	6.744	6.0922	6.1307	6.4655	5.9016	6.1052	6.3362	6.1078
	413	106766	ENSMUSG00000038781	Stap2	5.5324	5.0497	2.7024	2	4.8061	5.3506	3.7269	3.8178	4.4996	3.7246	3.8541	4.3264	4.2952	4.3436	4.7501	4.6377	3.7629	4.8113	4.1593	4.1957	4.885	4.5126	2.4576	2	5.5721	4.1818	3.5082	5.1823	5.2633	5.339	5.3584	5.928	5.2674	4.0908	4.8893	4.9891	4.7231	4.6943	5.1099	4.4683	4.3837	4.5508	5.2958	4.2387	4.6386
	414	13591	ENSMUSG00000057098	Ebf1	6.4435	6.4033	7.2949	6.5162	6.6784	6.4898	6.7231	6.6674	6.6631	6.2409	6.4543	6.7169	6.7404	6.341	6.7428	6.9517	5.1481	6.1582	6.4671	5.7372	6.0294	5.7933	5.2035	6.3138	6.9939	6.0292	4.6241	5.9636	5.7973	5.8884	5.1652	6.5374	5.1131	5.0483	4.6424	4.2027	4.5951	5.0525	4.3817	4.7017	4.5413	4.7452	4.7488	4.7569	5.1134
	415	13492	ENSMUSG00000039358	Drd5	5.7541	5.9598	6.9973	5.7211	6.7813	6.1593	5.4464	5.7905	6.4973	6.0222	6.0357	5.7918	5.8433	5.8418	6.8098	6.4058	4.3515	3.7688	4.518	5.286	5.3136	5.3362	4.5491	2.8649	5.6155	5.8521	4.7079	4.1432	4.715	5.4804	4.3544	8.5252	8.6413	8.3707	8.4722	8.8601	8.5802	8.372	8.8015	8.7092	8.5236	8.8307	8.5171	8.6386	8.6268
	416	320116	ENSMUSG00000048721	Fndc9	9.0907	9.0751	9.4507	9.0016	9.1784	8.9973	8.9361	9.1814	9.0604	9.0715	9.0795	9.0213	9.0293	9.3047	9.1134	9.0663	6.8769	7.2295	7.7108	7.6763	7.5345	7.2607	7.6192	7.0456	8.1661	7.6986	7.816	7.6101	7.7242	7.2077	7.7677	4.8961	5.0002	5.3259	5.1948	5.0368	5.9776	5.3759	5.1953	5.0223	4.5413	4.8333	5.6373	5.4698	5.289
	417	271970	ENSMUSG00000046561	Arsj	5.1506	5.541	5.7816	6.2691	4.9307	4.4855	4.8621	5.0645	4.6531	4.3442	5.5548	5.5161	4.8456	5.04	5.9373	5.5168	6.6984	7.1502	7.4022	7.2632	7.0693	6.8542	6.701	7.2146	6.8917	6.8957	7.5354	6.7095	7.2741	6.9524	6.9581	6.8907	7.0547	7.1941	6.8755	6.974	6.4662	7.1133	6.853	6.9597	6.9322	6.8205	6.6206	6.2749	6.9481
	418	23850	ENSMUSG00000073530	Pappa2	5.8341	5.3951	5.1609	4.935	5.3873	5.8876	5.794	5.4727	5.4241	5.687	5.6581	5.4646	5.429	5.5988	5.6387	5.3788	7.1373	8.301	8.2057	7.8356	7.9317	7.1756	8.8852	7.6905	8.1806	7.3523	9.2434	7.862	7.6963	7.7309	6.872	5.0588	4.295	4.958	4.8509	4.8085	5.3957	5.8369	5.5916	5.7688	5.5294	5.1745	4.0353	5.214	4.5494
	419	226304	ENSMUSG00000033774	Npbwr1	6.8224	7.3688	7.1324	7.166	6.7308	6.985	7.045	7.1069	6.8859	6.9021	6.9645	7.0844	7.2773	7.1021	6.994	6.9022	2	5.2368	4.518	4.7161	3.8298	5.0926	3.6959	2	3.8245	5.35	4.5351	3.1652	4.715	4.1332	5.1652	5.3999	5.8266	6.1127	6.352	6.0773	6.4292	5.4465	5.5916	5.8026	6.0591	5.6817	4.9402	5.9671	5.1743
	420	74284			7.6932	7.8329	8.0538	8.3058	7.7379	8.1606	8.0082	7.8692	7.8561	8.0575	7.7519	8.1954	8.1369	7.6304	8.0144	8.1138	8.9394	9.1725	9.0525	9.0989	8.5779	8.8638	8.8715	8.8913	8.3635	8.1116	9.215	8.8379	8.7347	8.972	8.7544	7.7278	8.04	7.8052	7.5253	7.9383	7.5924	7.6436	7.9557	7.6596	7.5942	7.6625	7.7655	7.9476	7.7801
	421	235415	ENSMUSG00000039714	Cplx3	5.4333	4.9486	4.9429	4.8266	5.2976	4.1947	5.1572	4.3215	4.7471	5.0165	4.9418	4.637	4.7787	4.8305	5.0001	4.7907	6.9585	7.6656	7.0371	7.3781	7.5145	7.6332	7.2743	7.5202	6.9093	7.2488	6.6427	6.5272	8.0937	7.0119	7.5315	7.1108	6.6863	6.8371	6.4705	7.2517	6.5376	7.1874	7.1055	7.4078	7.1681	6.7315	6.8407	6.9259	6.4899
	422	27528	ENSMUSG00000042834	Nrep	9.0578	8.9435	8.7526	9.2736	8.7286	9.0146	8.7406	8.833	8.9948	8.8915	9.0545	9.2363	9.0683	9.0702	9.2703	9.1919	8.1725	8.933	8.6251	8.6678	8.8695	8.5136	8.9948	8.593	8.7709	8.475	8.9177	8.7615	8.9595	8.5468	8.6288	11.1099	9.9128	9.9469	9.2852	9.959	9.2803	9.8128	9.5857	9.7915	10.1586	9.7169	10.0152	9.5986	9.6016
	423	12672	ENSMUSG00000040495	Chrm4	6.0504	6.4033	6.4669	6.0454	5.5123	7.0308	6.3556	6.5813	6.2787	6.1857	6.6169	5.7494	5.9383	6.2873	6.1068	6.0592	8.7914	8.8094	8.9569	8.935	8.8576	8.7506	8.7616	9.1825	9.3026	8.9662	9.1565	8.8992	9.1489	9.3607	9.0146	8.2667	8.2051	8.4264	8.6968	8.2505	8.7896	8.4643	8.2681	8.8001	8.6415	8.4498	8.1991	8.4885	8.4378
	424	22413	ENSMUSG00000010797	Wnt2	3.8068	4.4542	4.8623	4.6468	4.0547	4.4855	4.7248	2	4.4996	5.1665	4.8283	4.637	4.0898	4.3436	4.6802	4.8615	5.1481	5.5152	5.2494	5.4526	5.4879	5.1447	5.5638	4.4276	4.9138	4.6294	4.1111	5.8439	5.9229	5.1402	5.7098	6.6179	6.4381	6.5588	6.6707	6.9304	7.2256	6.4664	7.3203	6.7148	7.068	6.9543	6.7284	6.1537	6.537
	425	16814	ENSMUSG00000025216	Lbx1	2	2	2	2	2	3.016	2	2	2	2	2	2	2	2	2	2	2	2	2	2	2	2	2	2	2	2	2	2	2	2	3.1926	3.4739	2.4067	2	2	2	2	2	2	2.7205	3.141	2.5085	2	2	2
	426	70355			5.5324	5.7356	5.6675	2	6.0128	6.3522	5.8611	6.2232	5.7305	5.7453	5.4046	5.4646	5.8102	6.0817	6.0524	5.9	6.4043	6.716	6.7634	7.0886	6.6225	6.9004	6.4283	7.3944	7.0893	6.474	5.3007	6.6212	6.811	6.7155	5.819	7.4262	6.1381	5.7854	6.0644	6.7346	7.3889	5.863	6.8791	5.8357	6.2077	5.9218	6.9109	6.3617	6.6378
	427	81006	ENSMUSG00000040372	Gpr63	2.4693	4.2987	4.9816	5.7805	5.1516	4.3474	5.1028	4.8705	4.997	4.488	5.2806	5.4646	4.7787	5.279	5.5237	4.5546	4.9707	6.424	5.626	5.5538	6.1381	5.0926	5.9596	5.8216	6.2868	2.7718	6.5549	5.4517	5.7163	5.4114	5.7654	7.7813	7.301	7.5665	7.745	7.5681	7.3163	6.8651	7.8211	7.3402	6.5421	7.2708	7.7719	7.4059	7.715
	428	72832	ENSMUSG00000042401	Crtac1	10.2133	10.2114	10.1878	9.8355	10.2123	10.0147	10.0784	9.8373	10.1024	10.0633	9.892	9.8992	10.0165	9.8569	9.8482	9.7492	10.7418	10.8049	10.6586	10.7493	10.4737	10.2229	10.6044	10.1555	10.6623	10.4018	10.9758	10.7178	10.5793	10.7407	10.6055	10.744	10.921	10.9564	11.1744	10.9432	11.2174	11.0391	10.7909	11.0353	11.0095	10.9678	10.5389	11.1606	10.9973
	429	231290	ENSMUSG00000029219	Slc10a4	6.3514	6.9782	6.2777	6.6009	6.8301	6.0743	7.5908	7.3195	7.597	6.6706	7.5697	6.7603	6.8905	7.3903	7.327	6.4976	3.0185	5.8722	3.8162	4.4268	4.6111	4.6631	6.1836	2	6.7432	6.7389	4.2293	5.7471	4.7695	3.625	4.9895	3.688	3.2032	3.5879	2.8293	2.6171	3.0844	4.2167	3.5072	2.9793	2.6805	3.9056	3.9489	4.1243	3.3182
	430	110751	ENSMUSG00000027318	Adam33	5.9993	4.8953	5.2899	2	3.3659	4.0239	3.9892	5.5263	4.8353	5.2224	4.7051	4.2061	4.6348	4.4935	4.7501	4.2721	7.2322	6.0575	6.0116	5.6484	5.9718	6.9304	5.9596	7.0926	6.2321	5.4152	5.9779	6.6212	6.1455	6.7155	6.3423	3.8744	3.9747	4.3959	3.3526	4.0714	4.7231	5.1824	3.7523	5.133	4.7496	3.733	4.1941	4.7048	3.4223
	431	64074	ENSMUSG00000023886	Smoc2	4.7167	5.3162	6.4669	5.5945	5.8005	5.7298	4.7248	6.5939	5.6106	5.1377	5.4436	5.1093	5.5938	5.2512	5.1105	5.3788	8.4959	8.5375	8.0359	8.5317	8.2965	7.8606	8.0756	8.5473	8.0122	7.2033	8.6205	8.1666	8.439	8.3115	7.8211	9.5191	9.4689	9.734	9.9003	9.6892	9.5513	9.1861	9.8733	9.4505	8.8631	9.747	9.2916	9.3088	9.8342
	432	66540	ENSMUSG00000026655	Fam107b	8.052	8.1779	8.6239	8.0525	7.7799	8.4744	8.4287	8.2504	8.5101	8.2679	8.5319	8.3666	8.4852	8.4995	8.4149	8.5053	7.3213	7.3761	7.5454	7.4716	7.9981	8.1299	7.3686	7.8079	7.8492	7.6316	7.157	7.4032	7.6607	7.7095	7.6019	9.4196	8.5615	8.3397	8.3709	8.3026	8.2981	8.4034	8.1974	8.5032	8.3372	8.174	8.5615	8.4808	8.4096
	433	19144	ENSMUSG00000050063	Klk6	7.3086	6.844	5.5945	6.021	6.7978	6.703	6.4674	6.5939	6.7221	6.6298	6.6169	6.2833	6.3374	6.5148	6.4385	6.6454	2	4.6362	2.3953	3.3739	3.694	4.0488	2.4576	4.6948	4.3203	4.9706	3.3078	3.6666	3.4704	4.9587	3.6121	5.9695	4.9093	3.8105	4.8893	4.5036	4.0617	5.1404	4.5852	3.8443	4.1092	3.9848	5.492	3.2141	4.5026
	434	67516			8.3044	8.4925	8.2607	8.6894	8.1758	8.0757	8.2082	7.8949	8.3732	8.2069	8.541	8.7524	8.8207	8.7485	8.7833	8.6966	10.0992	9.609	10.3415	9.7487	9.8985	9.9827	9.7016	9.5138	9.2416	9.4688	9.8645	9.4663	9.3613	9.5631	9.6083	10.4479	10.7564	10.9262	10.6595	10.8882	10.2791	10.5881	10.7728	10.4834	10.3386	10.8531	10.5166	10.2318	10.5562
	435	21956	ENSMUSG00000026414	Tnnt2	6.31	6.5311	7.1914	5.561	7.0927	5.4211	6.4888	6.3023	6.3403	6.2273	6.3554	6.2226	6.056	5.9667	6.5407	6.0592	7.4397	6.8015	6.8915	6.6595	7.1878	7.2957	7.4447	7.4131	7.0738	7.2754	7.5005	7.1491	7.0053	7.5421	7.2193	5.4594	5.3154	5.3615	4.4507	5.5781	4.4047	5.8104	5.7124	5.2358	5.3703	5.1404	5.4295	5.0143	5.47
	436	268297	ENSMUSG00000044770	Scml4	8.1568	7.861	7.9793	7.6286	7.8207	7.6311	7.7408	7.4433	8.1377	7.929	8.1085	8.0368	7.9595	8.1122	7.6622	7.7807	7.6606	7.3479	7.3585	7.1383	7.4315	7.4895	7.3155	7.6038	7.3809	6.8255	7.8066	7.5054	7.4346	7.0119	7.5632	6.3614	6.2778	6.9929	6.6926	6.239	6.4904	6.6573	6.4283	6.75	6.3423	6.4116	5.3304	6.678	6.6593
	437	64706	ENSMUSG00000016763	Scube1	7.5819	7.7824	8.0493	7.554	7.9661	7.8514	7.7047	7.9549	7.465	7.7217	7.5608	7.3771	7.7745	7.6358	7.5589	8.0084	10.7256	11.4178	10.035	10.9095	10.3577	8.9209	11.122	10.5153	10.9977	10.2243	11.1205	11.0365	10.9786	10.7599	10.4561	9.0791	9.1824	9.3553	9.5201	9.3238	9.4685	9.1601	9.3662	9.3933	9.1712	9.2842	9.2538	9.4481	9.4263
	438	83762	ENSMUSG00000062372	Otof	9.736	9.6565	9.3076	9.5329	9.4704	9.7005	9.4036	9.4305	9.4261	9.3062	9.0323	9.3401	9.1892	9.1533	9.1782	9.1781	11.225	10.5258	11.1329	10.5293	10.6933	11.1835	10.4757	10.592	11.0765	10.8362	10.883	10.7483	10.5717	11.1939	11.1179	7.0346	7.0965	7.1641	6.9589	6.9114	7.0977	7.6585	6.6562	6.9894	6.7664	6.863	6.5636	7.4262	6.9306
	439	16876	ENSMUSG00000019230	Lhx9	5.2414	6.4777	6.1978	6.4261	6.6241	5.8876	5.9252	4.4381	5.8197	6.4426	6.2926	6.5538	5.9687	5.7652	6.3286	6.5414	5.8756	5.297	7.0232	6.7476	5.5678	7.4278	6.6801	5.8765	5.6985	6.7132	6.5549	6.5843	6.0385	6.4998	6.7255	7.5477	8.1466	8.4095	8.4241	8.1319	8.2387	8.157	8.1176	8.232	7.2953	8.1484	8.1173	8.1488	8.1984
	440	75718	ENSMUSG00000028753	Vwa5b1	9.8724	9.8387	9.805	9.8581	9.8653	9.6278	9.8785	9.5982	9.7045	9.8269	9.4989	9.6277	9.6415	9.6329	9.4596	9.533	7.7273	7.0489	8.0079	7.6875	7.7973	8.2298	7.87	7.4315	7.4544	8.0255	7.6244	7.5729	7.6093	7.5975	7.9999	5.0198	5.0577	5.0913	4.8509	6.0191	6.3521	5.7833	5.5271	5.4646	5.3703	5.0327	6.5636	6.0214	6.0763
	441	20274	ENSMUSG00000075316	Scn9a	9.7732	9.8138	9.6987	10.2375	9.3777	10.0761	10.0464	9.9991	10.0675	9.9458	10.0538	10.1745	10.2412	10.2009	9.9258	10.2609	6.6203	6.6712	6.7466	6.4123	6.7817	7.4382	6.8202	6.1677	6.2868	6.9518	6.8599	6.4677	6.5863	6.5327	6.9699	5.5982	6.0127	6.2896	5.4974	5.7738	5.5183	6.7157	5.8504	6.183	5.7063	5.6577	5.492	6.4828	5.8522
	442	320452	ENSMUSG00000051048	P4ha3	8.0053	8.0618	7.7407	7.188	8.0232	7.7455	7.6677	7.2252	7.622	7.8646	7.6217	7.6892	7.7572	7.7692	7.5973	7.7807	6.8081	7.2448	7.3474	7.278	7.8138	7.9141	7.3815	7.6595	7.4781	7.9283	6.5773	7.5153	7.7916	7.2964	7.571	5.6244	5.4717	5.6187	5.7263	5.5942	5.4946	5.3016	5.952	6.183	6.006	5.4503	5.7438	5.6181	5.9771
	443	333315	ENSMUSG00000042353	Frem3	6.7209	6.5656	6.8164	6.4074	6.7813	6.2781	6.7587	6.0869	6.1298	6.6195	6.7936	6.8434	6.2902	6.2596	6.7599	6.2561	4.445	5.8321	6.6772	6.7261	6.2633	6.7233	6.2416	5.3267	6.4151	7.4874	5.9087	6.8405	5.8986	6.4318	6.3784	5.0198	4.4319	4.463	4.8893	5.2338	5.4946	4.6943	4.9223	4.9025	4.3837	5.1404	4.9402	5.3218	4.1245
	444	19092	ENSMUSG00000029334	Prkg2	7.836	8.0858	7.7065	8.4176	7.7121	7.8641	8.0082	7.7388	8.0529	7.838	8.2529	8.2873	8.2149	8.1911	8.5036	7.9282	9.5258	9.1765	9.7651	9.4238	9.9497	9.7054	9.5887	9.679	8.6193	9.1736	9.1187	9.3585	9.1098	9.3283	9.4196	6.3457	6.0975	6.7724	6.5201	6.5497	6.0445	7.2079	5.9273	6.8667	6.1598	5.6086	6.7413	6.9429	6.1839
	445	327766	ENSMUSG00000060044	Tmem26	6.067	6.5993	6.5465	5.9452	7.0244	6.7585	6.6866	6.8782	6.3994	6.4068	6.716	6.4516	6.8746	6.2456	6.5603	6.685	4.3515	3.7688	3.9398	5.029	4.365	4.1543	4.2427	2	5.1086	2.9585	3.5082	3.6666	3.1795	4.4407	3.8364	2.5305	2.7236	2	2	2	2.4579	2	2	2	2	2.7083	3.5396	2	2.2469
	446	13592	ENSMUSG00000022053	Ebf2	5.5562	5.6416	5.6675	6.3692	5.4302	5.8369	5.4894	6.5557	5.9636	5.8555	6.5469	5.614	5.8102	6.2315	6.2096	6.1182	4.3515	5.1741	5.2494	5.286	5.2178	4.6631	4.2427	3.2441	3.6684	4.6834	4.1111	4.2412	4.7695	3.9508	4.678	4.5024	2	2.5864	2.4734	3.927	2.247	5.2629	2	2.4047	2.38	2.5085	4.528	3.956	2
	447	12918	ENSMUSG00000049796	Crh	6.2675	7.3491	6.2777	5.3421	7.2324	6.5851	6.4237	5.445	6.9857	6.2409	7.1051	6.9782	6.5123	6.6163	6.9352	6.9189	7.0507	7.5344	7.3249	7.4586	7.0555	7.163	7.232	6.5344	7.3166	7.5248	7.0161	7.2818	6.8992	6.8519	6.8593	5.5715	5.9071	5.7854	5.522	5.4606	6.0768	6.0786	5.389	6.5045	6.3207	6.0561	6.044	5.7267	5.3952
	448	53972	ENSMUSG00000026259	Ngef	10.6639	10.9584	10.8464	10.5915	11.0283	10.6298	10.856	10.8703	10.5722	10.7941	10.6563	10.4951	10.6774	10.6861	10.4993	10.6007	12.015	12.1264	11.8322	12.0404	11.8852	11.611	12.1061	11.8848	12.1718	12.0409	12.1202	12.1076	12.2686	12.0655	11.8357	10.8541	10.8886	10.7169	10.6931	10.9788	10.975	10.8028	10.9833	10.8165	11.175	10.9049	10.5269	10.8741	10.8946
	449	353287	ENSMUSG00000033633	Clec18a	3.6389	4.84	4.0482	4.8818	5.6272	4.9345	4.7248	3.729	4.2008	4.5764	4.3415	4.8122	3.7136	3.7691	4.4476	4.1642	6.5588	6.6712	6.3381	6.439	6.6225	6.4813	6.3512	6.2109	6.3904	5.7547	6.8414	6.0742	7.0501	6.9402	7.0946	4.9385	5.6693	5.6187	5.1948	5.1711	5.6095	5.5139	4.8713	5.4646	5.7063	5.2724	4.9402	5.956	5.6737
	450	272031	ENSMUSG00000063446	Plppr1	7.8837	7.9552	8.2725	8.228	7.995	7.962	7.7229	7.8898	8.0343	7.9416	8.1445	8.1875	7.952	8.073	7.8087	8.0545	8.1861	7.6542	8.4384	7.7948	8.1289	8.1993	7.9679	7.7577	8.0284	8.2432	8.0429	7.7747	8.0448	7.9165	7.9163	6.813	7.4427	7.3793	7.1045	6.879	7.0416	7.8467	6.9046	7.3517	7.2617	6.8734	7.1717	7.2509	6.8948
	451	110058	ENSMUSG00000058420	Syt17	8.6071	8.5626	8.3814	8.4361	8.6309	8.3352	8.6487	8.3128	8.3472	8.4487	8.369	8.3666	8.4534	8.5229	8.5533	8.5272	10.1728	10.1452	10.0298	10.1833	9.8771	9.421	10.273	9.9067	9.6359	9.1233	10.299	9.9631	10.0926	10.0551	9.6769	9.5773	9.8003	9.8977	10.2161	9.8168	10.1683	9.7806	9.8355	9.8228	9.8303	9.8067	9.1093	10.024	9.8999
	452	12424	ENSMUSG00000032532	Cck	8.4917	8.1094	8.675	8.1287	8.9836	8.5861	8.0804	8.4336	8.0574	8.6808	8.3069	8.2344	8.0331	8.4545	8.8761	8.2187	11.8718	11.787	11.9004	11.9877	11.5652	11.7218	11.576	11.7791	11.9557	11.6119	12.1182	11.9172	12.1403	12.0028	11.9515	12.2467	12.0932	12.0587	12.215	12.0483	12.2319	12.0587	12.0324	12.2561	12.1	12.2908	12.1615	11.9308	12.0392
	453	432530	ENSMUSG00000020431	Adcy1	10.5589	10.4507	10.528	10.6323	10.6745	10.6204	10.3922	10.699	10.7025	10.8556	10.7586	10.6531	10.5097	10.5408	11.2745	10.634	14.0145	13.7269	13.7689	13.608	13.6684	13.6351	13.7282	13.7286	12.8894	13.4595	13.3525	13.5414	13.9037	13.5108	13.6229	14.9448	14.8912	14.7944	14.5634	14.8492	14.7727	14.5542	15.0318	14.817	14.8305	14.7721	14.8896	14.6116	14.8459
	454	665700	ENSMUSG00000055632	Hmcn2	7.7966	7.861	7.1831	7.9847	7.5945	8.0866	7.7932	7.9101	7.1666	7.3285	7.3814	7.5723	7.6302	7.0546	7.3384	6.9022	6.8936	4.2053	6.2691	5.0977	4.885	6.8852	4.8017	5.5454	5.7383	5.2463	6.4613	5.9636	5.9933	5.9135	5.6221	3.7842	4.1437	4.0033	4.0382	3.5202	4.1854	3.2035	4.3069	3.9689	4.2979	3.5368	4.4036	3.9107	4.2988
	455	100042178			7.6275	7.8043	7.6475	7.8664	8.0714	8.02	7.8766	7.6629	7.9966	7.6923	7.6964	7.9644	7.9367	8.1083	7.5782	7.852	9.5444	9.243	9.4432	8.9992	9.4673	9.4678	9.0888	9.3346	9.0092	9.516	8.3797	8.9436	9.0504	8.8502	9.0901	8.8974	9.148	8.8149	9.1732	8.9058	9.2751	9.0762	9.0044	9.1186	9.1469	8.7019	9.4883	9.2846	9.0099
	456	319239	ENSMUSG00000043659	Npsr1	6.3514	6.7115	7.2559	5.381	6.5483	6.6452	7.0305	5.5263	6.8546	6.7583	6.9236	6.7815	6.6683	6.9972	7.2078	7.0611	6.3569	6.6938	6.8605	6.046	6.6225	6.3762	7.1735	6.649	6.874	6.0904	7.4282	6.7266	6.5556	6.3233	6.5779	4.3846	5.1131	5.1738	3.8949	4.9397	5.1447	3.951	5.1532	4.0836	4.9874	5.1745	5.0687	4.536	4.3525
	457	238276	ENSMUSG00000021057	Akap5	8.7531	8.9336	8.9238	9.2103	8.6171	8.9623	8.7227	8.8088	8.9585	8.8937	8.884	9.0952	9.1334	8.9039	8.6706	8.8996	11.6205	11.7006	11.6908	11.6932	11.5239	11.225	11.541	11.5417	11.1326	11.2728	11.8899	11.3736	11.5898	11.3587	11.5606	10.8091	11.0143	10.827	10.8973	10.9852	10.8695	10.9216	10.772	10.9678	10.9701	10.8656	10.6998	11.0253	10.828
	458	320939			8.5222	8.4236	8.4554	8.666	8.7243	8.4744	8.6862	8.7108	8.438	8.5694	8.6241	8.6055	8.4209	8.6374	8.1691	8.3476	10.381	10.2648	10.4521	10.3993	10.6214	10.3322	10.4666	10.4913	10.0518	10.4657	9.9954	10.2694	10.4116	10.1495	10.3036	9.7376	9.9089	9.7135	9.8659	9.7875	10.1399	9.6943	9.8019	9.9108	9.8699	9.7341	10.1867	10.0872	9.9178
	459	19277	ENSMUSG00000030223	Ptpro	11.0365	11.3136	11.4275	11.2325	11.1646	11.2363	11.3008	11.4132	11.3154	11.3147	11.2915	11.2588	11.351	11.3544	11.2759	11.2877	10.6342	10.7997	10.9592	10.8043	10.5714	10.5411	10.8645	10.6668	10.6879	10.5205	10.9936	10.7546	10.4444	10.738	10.5921	9.6154	9.5872	9.6874	9.6232	9.9062	9.4867	9.4388	9.8619	9.6705	9.5602	9.6817	9.5186	9.6155	9.7886
	460	263764	ENSMUSG00000050967	Creg2	10.7648	10.787	10.9592	10.9852	10.5194	10.7732	10.6534	10.6178	10.9941	10.8991	10.9614	11.2455	10.9401	10.9601	11.166	11.1218	11.7889	11.7592	11.7121	11.6751	11.5512	11.2265	11.9135	11.4932	11.5256	11.3717	12.1462	11.52	11.611	11.6232	11.4149	11.9591	12.0822	12.1627	12.2536	12.2778	12.0657	11.8739	12.2843	12.1671	11.8116	12.1676	11.9745	11.9952	12.178
	461	70853	ENSMUSG00000050122	Vwa3b	5.7541	5.4699	5.4364	5.2187	6.0407	5.1156	5.8935	5.6281	5.9239	5.9578	5.0968	5.6605	5.429	5.4354	5.0001	5.3297	5.3061	3.9294	5.1505	4.7161	4.4518	5.4231	4.2427	4.8671	3.8245	5.4468	2.7973	4.5008	4.5377	5.3757	4.2015	8.0991	8.3732	8.1076	7.8213	8.1237	7.631	7.6953	8.3817	8.1619	7.8791	8.3031	8.0617	7.6768	8.3112
	462	78754	ENSMUSG00000021903	Galnt15	5.9641	4.84	6.1813	3.4125	5.9552	5.0279	5.7237	6.3023	5.8623	5.8015	5.7544	5.5659	5.8757	6.0171	5.3089	5.7211	4.6157	5.1741	4.518	4.7161	5.0047	5.6564	5.2035	7.081	5.2802	5.677	5.6365	5.5314	6.1455	4.0449	4.3544	5.8634	4.4747	4.1733	4.8893	5.1711	4.5031	4.6943	4.7636	5.1853	4.9874	4.8333	4.4671	4.5655	4.9832
	463	16371	ENSMUSG00000060969	Irx1	6.7521	6.5993	6.5335	5.8093	7.1832	6.731	6.2088	6.9289	6.2787	6.2809	6.2711	6.4249	6.2659	6.4672	6.3513	6.0592	4.7683	4.6362	4.1593	5.029	5.0047	5.3803	5.3691	5.021	4.0936	4.515	4.9337	5.4102	4.715	5.8101	5.0355	4.6114	3.7833	3.1724	4.0382	2.6171	2.9514	4.2954	3.5072	3.3892	3.6366	3.3097	3.8569	3.9107	4.1849
	464	22772	ENSMUSG00000061524	Zic2	8.6602	8.3758	8.4101	7.8868	9.2989	8.4909	7.4671	7.8898	8.0981	7.9457	7.9136	8.5875	7.7659	8.7559	8.6295	7.532	8.778	8.7352	9.3791	9.3693	8.4729	9.7814	9.1162	9.2772	8.8457	9.2404	8.1214	8.8142	9.192	8.876	9.154	9.6996	8.2946	8.1076	8.3366	8.3244	8.1879	8.3945	8.0675	8.1356	8.0659	8.1697	8.9736	8.334	8.2274
	465	71889	ENSMUSG00000010080	Epn3	6.3377	6.6645	6.4254	5.5945	6.5483	6.1174	6.1019	6.3772	6.2144	6.8139	6.1105	6.5783	6.3605	6.4792	7.0914	6.1182	3.2436	4.4368	4.1593	4.3159	4.6111	5.1447	3.318	6.4098	4.5161	2	3.6842	4.9115	4.5377	3.4976	5.1233	6.0297	6.2534	5.4959	6.1926	6.566	7.7103	6.1438	5.8765	4.9025	6.254	5.9809	7.7719	6.1537	5.9425
	466	104027	ENSMUSG00000043079	Synpo	9.4929	9.5047	9.4541	9.8769	9.6556	9.8677	9.7339	9.5176	9.2981	9.5108	9.2572	9.3684	9.2273	9.3047	9.1332	9.1884	12.5085	12.3277	12.1636	12.2651	12.1933	11.7955	12.426	12.1367	12.2778	12.0772	12.4861	12.3538	12.4231	12.3175	12.0415	11.9828	11.974	11.8701	12.0259	11.9971	12.132	11.8779	12.1363	12.0051	12.0186	12.0498	11.7953	11.9124	12.1581
	467	23893	ENSMUSG00000050069	Grem2	9.9224	9.723	9.6929	9.4278	9.7044	9.7932	9.5806	9.5357	9.7349	9.7278	9.7609	10.0247	9.808	9.85	9.9868	10.0092	9.4823	9.9318	9.5538	9.8392	9.7001	9.442	9.9657	9.4131	9.5406	9.404	10.0805	9.7876	9.6591	9.6995	9.629	8.1269	8.0994	8.5704	8.5932	8.4309	8.4227	8.6849	8.2281	8.456	8.3796	8.4774	7.8335	8.7505	8.1799
	468	110084	ENSMUSG00000019027	Dnah1	10.1037	10.2087	10.1254	10.3298	10.2457	10.2091	10.2209	10.0098	9.8987	10.1278	9.9389	9.8473	10.0488	9.8866	9.7996	9.7884	8.8396	8.1865	8.5	8.2136	8.5585	9.0529	8.1458	8.2788	8.4379	9.0837	8.4545	8.8803	8.3612	8.742	8.5399	7.5339	7.7955	7.6696	7.3232	7.6547	8.1428	8.0476	7.5805	7.9591	7.8492	7.5036	7.5178	7.9135	7.9246
	469	320078	ENSMUSG00000038463	Olfml2b	6.163	6.926	6.5335	6.8429	6.3617	6.838	6.4888	6.6311	6.5633	6.6298	6.4351	6.0232	6.6497	6.3542	6.5208	6.4524	6.308	5.297	5.626	5.5538	5.2665	6.0334	5.9938	5.4034	5.8148	5.8521	4.9337	6.1519	5.6305	5.7274	5.7654	9.4873	9.5299	9.8778	9.8611	10.0842	9.9794	9.7195	10.0282	9.783	9.5807	10.2205	9.6391	9.5797	10.1055
	470	18168	ENSMUSG00000044014	Npy5r	7.3294	6.2631	6.1978	6.5844	6.4683	6.9377	7.2339	5.8122	6.9367	6.7956	7.0172	6.6722	7.2528	6.7415	7.2202	6.9517	5.8068	6.528	5.7325	6.1787	6.164	5.8256	4.8769	6.7552	6.5101	6.1103	6.4853	6.02	6.3017	5.9626	6.3239	6.6817	7.3764	7.1842	7.4246	7.195	7.1289	7.1133	7.222	7.3286	7.402	7.4348	7.1621	7.1714	6.9655
	471	15234	ENSMUSG00000028864	Hgf	3.6389	3.5656	3.0323	3.6852	3.3659	3.6062	2.4115	2.2755	3.1825	3.9399	3.6013	3.1406	3.2034	3.8454	2.9669	3.0319	6.2573	7.0663	7.1438	6.439	7.1099	6.5602	5.6943	6.4823	5.4335	6.6332	6.7846	6.1006	6.5556	6.4143	5.819	5.5982	6.0415	5.8114	5.768	5.8425	6.4783	6.0561	5.4597	5.6247	5.3703	5.4779	5.5519	5.5752	5.5178
	472	16493	ENSMUSG00000045534	Kcna5	8.2251	8.5796	8.3778	9.0506	8.6355	8.4661	8.7046	8.4615	8.6983	8.7796	8.7733	8.4285	8.4747	8.546	8.1238	8.6722	7.0507	7.8774	7.0509	7.4189	7.1623	7.2607	7.2743	6.601	7.8672	7.6178	7.8897	7.4347	7.3743	7.5819	7.8472	4.6629	4.7083	5.2134	4.7295	5.0131	5.2895	4.5086	4.9223	4.8386	5.0931	5.7512	3.5396	5.2689	4.9487
	473	11606	ENSMUSG00000031980	Agt	12.4564	12.6518	12.4916	12.4996	12.876	12.5331	12.8379	12.3817	12.5396	12.7147	12.8388	12.2968	12.4694	12.438	12.3867	12.4875	10.4219	10.1267	10.4482	10.3649	10.633	10.939	10.7727	10.5547	10.6752	11.4052	10.2769	10.5617	10.3243	10.4366	10.8413	9.1026	8.6507	9.238	9.3154	9.0695	9.2074	9.3609	9.1452	9.3191	9.1408	9.2704	9.134	9.7535	9.1069
	474	77627	ENSMUSG00000022441	Efcab6	6.1784	5.7049	5.5693	6.021	5.8005	5.3506	5.6113	5.3589	5.2744	5.5186	5.4816	5.6605	5.8433	5.5988	5.2131	5.9976	7.5804	7.6656	6.9218	7.233	7.1494	6.6886	7.1585	7.6905	7.0893	6.5915	7.1718	7.0845	7.0501	7.4845	7.6618	7.1383	7.0261	6.5434	7.2878	6.8526	6.9574	6.9648	7.149	7.169	6.988	7.0494	7.334	6.8971	7.0734
	475	19713	ENSMUSG00000030110	Ret	10.0524	10.3417	9.7416	10.3035	10.0501	9.9325	10.3373	10.3678	10.5464	10.1896	10.5474	10.2412	10.3718	10.4718	10.2805	9.9556	6.4502	6.2523	7.1047	7.1545	6.8472	7.539	7.065	6.8265	7.1198	7.2665	7.3124	7.2109	6.3739	6.5648	7.1054	7.0346	6.7575	5.4959	6.2078	6.614	6.3783	6.2063	6.1575	6.183	6.1839	6.0743	6.2569	5.8031	6.2978
	476	65100	ENSMUSG00000041703	Zic5	5.4837	4.7824	5.2268	5.1302	4.6697	5.0279	4.9261	2.5068	5.1424	4.7763	4.8283	5.2377	5.1402	5.1645	5.5631	4.5546	5.3551	4.9675	5.626	5.9748	5.6435	5.977	5.6943	5.5789	5.4812	6.6604	3.9824	6.0473	5.8986	6.1436	6.188	6.4666	5.5935	4.6475	5.1948	5.2338	5.3699	5.2629	5.2759	5.4217	5.452	5.1054	5.2604	5.4059	5.0819
	477	22402	ENSMUSG00000005124	Wisp1	2	3.5656	2.2739	2.3528	2.3956	2.5956	2.7312	3.178	2.7091	3.3761	3.1126	2.8505	2.4067	2.7999	2.3986	4.1642	6.7172	6.5529	6.4041	5.286	6.2145	5.2436	5.4203	6.7552	6.3652	5.6228	6.3869	6.2727	6.4921	6.1222	6.4136	3.688	4.0896	4.3959	3.8949	4.5699	4.3529	4.635	4.4528	3.8443	3.3258	4.3261	3.7587	4.1243	3.6961
	478	381489	ENSMUSG00000034009	Rxfp1	5.5796	5.433	4.6384	4.6468	5.8328	4.8347	5.8279	6.6064	6.1471	5.9903	5.6909	5.9122	6.2413	5.8967	6.2096	5.866	5.8756	6.1582	5.7663	5.9748	5.1674	5.6564	5.0816	5.5454	5.8148	5.21	6.1969	6.4056	5.7973	6.5806	6.6683	6.7784	7.1033	6.6189	6.6261	6.5741	5.8527	6.758	6.4458	6.5846	6.6326	5.881	6.183	6.2838	6.0109
	479	233919	ENSMUSG00000040125	Gpr26	7.948	8.1555	8.4928	8.1115	8.5213	8.6314	8.3838	8.1513	8.172	8.5395	8.2083	8.1954	8.5668	8.408	8.3712	8.5701	9.8947	10.2033	9.6789	9.796	9.5109	8.788	9.7991	9.3248	9.8372	9.3777	10.0726	9.9082	9.9164	9.8715	9.8118	9.0186	9.3702	9.5279	9.4625	9.447	9.5252	9.2268	9.4619	9.3366	8.9535	9.0187	9.0247	9.3401	9.1321
	480	230779	ENSMUSG00000023232	Serinc2	4.5373	4.4542	5.491	3.5553	6.1727	4.8347	5.309	6.3918	5.4241	5.1377	4.1658	4.0747	5.1402	4.9038	4.5294	4.7907	5.8416	5.3547	4.518	5.3991	3.9539	5.5052	2.8045	6.123	5.2252	5.1727	4.6241	4.5008	4.9218	4.8586	4.893	7.2935	7.0827	7.0811	7.7026	7.2517	7.9383	6.565	7.2621	7.1428	7.1437	7.2787	7.6401	7.3433	7.5863
	481	20618	ENSMUSG00000023064	Sncg	9.1757	9.441	9.5887	9.3854	9.7175	9.1609	9.5757	9.3639	9.2687	9.5038	9.3654	9.0952	9.2147	9.1017	9.1364	9.3074	5.6969	6.2824	6.1461	6.1787	5.7839	5.1447	4.7223	5.2868	6.1161	6.2239	6.0113	6.2014	5.8233	6.0559	6.4649	5.9899	5.7588	5.3615	5.3945	5.7309	5.8712	6.2063	5.6831	5.4646	5.7392	5.6817	6.458	5.7907	5.8707
	482	243634	ENSMUSG00000038115	Ano2	3.2298	4.1244	2.2739	2	4.7395	4.0239	3.864	5.2028	4.2657	3.8716	4.2563	3.9302	4.2952	4.2342	4.0642	4.7162	7.4734	6.6712	7.4959	6.8103	7.2617	7.0308	6.1536	5.4762	6.7235	7.3186	6.6212	7.1364	7.4261	7.2772	6.9699	4.4447	5.3154	5.2893	5.7885	5.4252	5.3168	6.1224	4.7065	5.5469	5.1915	5.0695	4.3371	5.4059	4.9487
	483	11889	ENSMUSG00000020884	Asgr1	2	2.8797	4.3138	2	4.6697	4.4855	4.9261	2	3.1825	3.3761	3.2945	3.1406	2.9834	4.8305	3.3735	4.0475	4.3515	5.4102	5.3862	6.491	4.9461	6.5213	5.6943	6.601	5.6985	5.7033	2.453	5.3674	4.8221	4.751	5.6221	4.8524	3.7134	4.7042	3.9683	4.5699	3.0844	5.0971	4.3817	4.2887	2.6805	3.733	4.8476	4.5945	3.7769
	484	170788	ENSMUSG00000063681	Crb1	7.3016	6.858	6.9097	6.7861	7.6317	7.2404	7.2958	7.1069	7.0048	7.2433	6.8816	7.276	7.012	7.0943	6.8261	7.1767	6.6792	6.6483	6.4041	5.8609	6.0573	6.0608	6.3512	6.8125	6.4634	6.789	7.0961	6.0473	6.5556	7.0235	6.5779	3.5849	4.1959	4.7586	4.5968	4.0714	4.5498	4.4409	3.2117	5.5063	4.0048	4.0598	4.2673	5.0355	3.9261
	485	64580	ENSMUSG00000027971	Ndst4	7.8408	7.6837	7.9936	8.3555	7.7882	7.4405	7.6771	8.0077	8.1762	7.9826	8.0963	8.1875	8.1235	8.202	8.2558	8.617	8.0135	8.2101	8.1167	7.8654	7.9392	7.1881	8.4155	8.2788	8.0122	8.1408	8.6205	7.9517	8.141	8.1085	7.788	8.2667	8.6554	8.2851	7.8938	8.6652	8.2351	8.0813	8.2973	8.1619	8.5283	8.4037	8.041	8.3102	7.9768
	486	100502933			5.0537	5.4699	5.2268	5.1302	6.0128	5.4211	5.6872	5.7905	5.7533	5.328	5.4816	5.2377	5.6696	5.5988	5.7791	5.2788	2	3.3814	2	3.1334	3.1874	3.5274	3.084	2.3491	4.0936	4.3908	3.3078	4.3331	3.5964	4.2952	3.7286	4.1876	3.9137	4.3959	2.2561	3.927	3.6965	5.0525	3.367	3.8443	2.929	3.5368	4.5865	4.903	4.1245
	487	380702			8.4731	8.2906	8.3148	8.701	8.6309	8.7319	8.4065	8.6696	8.5068	8.4101	8.4671	8.4352	8.5618	8.4936	8.88	8.5108	9.9112	9.469	9.6767	9.3483	9.3281	9.2382	9.4353	9.1495	9.1523	9.1086	9.6976	9.2029	9.3094	9.2613	8.7917	11.6901	11.788	11.9831	12.0007	12.0607	11.9919	11.6995	12.0515	11.7266	11.4857	11.8229	11.7675	11.8384	11.9503
	488	223915	ENSMUSG00000063661	Krt73	4.4385	4.2987	4.8202	4.935	5.6991	4.3474	4.4034	4.9512	4.2008	5.1083	4.9953	3.7695	4.6348	4.7925	4.4476	4.8615	4.3515	4.4368	5.9831	5.8609	5.061	4.5126	5.0166	3.5441	5.0466	4.1818	6.2256	4.6511	4.4735	5.0523	5.206	7.12	6.9369	7.1438	7.0378	7.1306	7.4332	7.0467	7.2621	6.914	7.2039	7.1386	7.0103	6.8439	6.7422
	489	98267	ENSMUSG00000026094	Stk17b	6.2675	5.1891	5.4364	5.6905	5.6272	5.9366	6.2088	6.8574	6.2787	5.9742	6.3757	5.8732	6.4055	6.3928	6.3956	6.6654	7.2711	6.8015	6.6772	7.2481	7.5542	7.4382	6.8202	7.4765	6.4634	8.0818	6.6639	6.6393	7.3387	6.8904	7.0393	8.1361	6.6954	6.6189	6.8071	6.7128	6.9133	6.9886	6.9422	6.6788	7.0809	6.8838	6.8995	7.0669	6.3647
	490	244202	ENSMUSG00000049709	Nlrp10	2	2.8797	2.2739	2	2	2	2	2	2.7091	2	3.1126	2	2	2.7999	2.3986	2	2	2	2	3.1334	3.3767	4.431	3.084	4.5674	3.2942	4.515	3.6842	2	2.3254	2.6051	4.5571	3.4739	2.2176	2.8092	2	3.4515	2.8049	2.6052	2.6102	2.4047	2.38	3.0401	2	2.4436	2.2469
	491	110835	ENSMUSG00000035594	Chrna5	3.547	3.0841	3.9733	2	2.7057	2	2.9928	4.381	4.3279	3.2741	4.3415	4.637	3.8502	4.2342	4.0642	2.4311	2.7518	4.0739	3.6809	3.9204	2	3.3611	4.8769	4.8119	3.4934	4.0234	3.3078	4.7872	4.7695	4.2952	3.8364	6.6692	6.6305	6.7856	7.0632	6.7128	6.9044	6.6423	6.853	7.0471	6.579	6.7655	6.4264	7.1076	6.8581
	492	14282	ENSMUSG00000003545	Fosb	5.2704	6.4223	6.3971	6.4261	6.6241	6.5223	6.284	6.1047	5.7073	6.1573	6.2492	5.5659	6.3832	5.9667	5.8122	6.3077	8.6314	8.6571	8.1233	8.4618	8.3484	7.973	8.7666	8.2376	8.2303	8.0918	8.5197	8.2747	8.1717	8.3115	8.1537	7.3884	7.5718	7.8309	7.8361	7.8104	7.9986	7.8069	7.1596	7.5837	7.6121	7.4697	7.334	7.2463	7.6359
	493	53420	ENSMUSG00000004961	Syt5	11.6148	11.6527	11.4997	11.4296	11.6783	11.4685	11.3549	11.2867	11.3373	11.4703	11.4109	11.4473	11.3131	11.3703	11.264	11.3856	11.7221	11.6639	11.7437	11.8532	11.7316	11.7378	11.8624	11.4633	12.078	11.7183	11.9127	11.7959	11.6966	11.8693	11.7483	11.044	11.0261	11.0254	11.0709	11.1321	11.1273	10.9793	11.0951	11.1234	11.2469	11.1108	10.8294	11.0149	11.0772
	494	57765	ENSMUSG00000001444	Tbx21	4.0269	3.2631	4.1193	4.4415	3.6818	2	2.7312	3.0372	2.5092	2.2355	2.9044	2.487	2.7237	3.4154	2.7105	2.4311	2	3.14	2	3.1334	2	2	2	2	3.9653	3.4064	3.3078	2.6972	2	2.334	3.0204	3.078	2.4067	2.3228	2.979	3.927	2.6418	3.4978	3.2117	2.4047	2	2.8837	3.4162	2.7824	3.4223
	495	11472	ENSMUSG00000052374	Actn2	7.6386	6.9782	7.0619	6.6009	6.846	6.703	6.9403	7.6984	6.976	7.4795	7.0805	6.7815	7.083	6.8567	6.9501	7.0761	7.3935	8.4475	7.6933	7.8456	8.0195	8.1169	7.9418	8.5889	7.9458	8.3471	8.3474	8.1028	7.9417	8.3626	7.8853	7.4557	7.9965	7.8808	8.1039	8.0902	8.365	7.6132	8.0447	7.9363	7.3173	7.9358	7.8213	7.9808	8.165
	496	15558	ENSMUSG00000034997	Htr2a	7.2945	7.7603	7.7407	7.5108	7.9067	8.2212	7.9631	7.9887	7.9676	7.895	7.8996	7.8585	7.929	7.9092	7.857	7.8607	7.4052	8.5745	7.6487	7.7421	7.6491	6.9304	7.7944	7.3944	7.7456	7.5395	8.5427	7.8697	8.4886	7.8851	7.5153	7.0732	7.0405	7.2711	7.3302	7.5227	7.4332	7.6807	7.149	7.5442	7.2039	7.4489	6.394	7.5496	7.008
	497	20608	ENSMUSG00000037014	Sstr4	6.163	6.5135	6.4532	4.3659	6.8773	6.838	6.0163	7.1757	6.2144	6.4068	6.2044	6.1263	6.3605	6.4792	5.996	6.1469	7.7273	7.0663	7.6396	7.8051	6.6411	7.4996	6.7215	7.1715	7.1643	7.5827	7.3779	7.2818	7.7173	7.8399	7.3249	8.9214	9.0628	8.7323	9.2433	9.0624	9.2593	8.9235	8.9955	9.0248	8.8252	8.9878	8.6429	8.9638	9.153
	498	18133	ENSMUSG00000037362	Nov	7.7613	7.2032	8.1117	7.3826	7.8914	8.7797	7.9087	6.8574	7.312	8.1028	7.5519	7.5601	7.649	8.7829	7.1953	7.1628	11.8484	11.4263	11.8332	11.7735	11.2973	11.7478	11.2496	11.5575	10.9656	11.2219	11.7417	11.2859	11.8148	11.7092	11.4567	10.9628	11.2213	11.3133	11.3877	11.2695	11.4833	11.2458	10.8003	11.1031	11.8126	11.0592	10.461	11.3747	10.426
	499	320924	ENSMUSG00000046318	Ccbe1	4.3864	5.541	5.056	4.8818	5.0454	5.8876	5.1572	2.706	5.4799	5.6261	4.9418	5.2377	5.9073	5.3593	5.3089	6.089	5.3551	5.6131	6.1461	6.3851	6.6411	6.4813	6.2698	5.5789	5.8515	5.5949	6.3351	5.2308	6.4426	5.8628	5.7654	8.546	8.9188	9.2356	9.0326	8.9563	8.8089	8.942	8.9285	8.8084	8.202	8.8519	9.0034	8.6864	8.9149
	500	241489	ENSMUSG00000075270	Pde11a	5.9463	6.1077	6.1132	6.31	6.5676	6.6155	5.1028	6.4204	6.2944	6.0063	6.0099	5.7918	5.8757	5.8418	5.7791	5.9976	6.7359	6.1903	6.7801	6.5163	5.9718	5.7265	6.9125	5.2868	6.3395	6.2419	5.3538	6.4878	5.4078	6.4831	6.1256	6.8356	7.4264	7.7592	7.7709	6.8459	7.9251	7.4507	7.0027	7.6127	7.621	6.9043	6.5193	7.6322	6.9128
	501	26563	ENSMUSG00000035305	Ror1	2.9716	4.1244	3.8944	5.3021	2.7057	4.4855	4.4034	2.5068	3.3111	4.0674	3.7332	3.1406	2.4067	4.3436	4.0642	4.6377	2.4243	3.9294	2.3953	4.881	3.8298	4.5126	5.3691	5.5789	5.0466	4.4543	5.2457	4.2412	5.1445	3.9508	4.1185	6.7187	6.5526	6.4136	5.848	6.465	6.3652	6.3788	6.5468	6.3527	6.3636	6.3532	6.2569	5.9781	6.2132
	502	18430	ENSMUSG00000049112	Oxtr	7.7664	7.7071	7.7122	7.9656	7.3818	7.4573	7.3783	7.9646	7.6886	8.0303	7.9548	7.7004	8.0331	7.7741	7.4157	7.9364	9.5784	9.0424	9.0628	9.0736	8.6576	8.9541	9.0033	8.1513	8.6087	8.216	8.9525	8.8689	8.583	8.8338	8.8603	6.9333	7.7656	7.9052	8.2546	7.6471	8.0319	7.8661	7.482	7.9888	7.3389	7.6805	7.1717	7.7494	7.785
	503	13842	ENSMUSG00000028661	Epha8	8.0645	7.8679	7.5284	6.9373	7.876	8.1606	7.5303	8.0358	7.918	7.9206	7.2332	7.3346	7.5116	7.0864	7.5782	6.9996	5.2553	5.3547	6.2925	5.9378	5.8493	5.8881	5.6521	6.601	7.2355	5.9653	5.9087	6.4266	6.703	6.6571	6.3423	6.9228	5.4504	5.5276	5.6833	5.6717	5.8339	5.9138	5.5916	5.1853	5.4912	5.5316	6.2747	5.8991	5.5867
	504	69315	ENSMUSG00000021534	1700001L19Rik	7.7355	7.847	8.2127	7.6286	8.0162	7.8641	7.8685	7.5765	7.8613	7.9036	7.7827	8.0716	7.9595	8.1389	7.8168	8.3038	8.1587	8.3586	7.6756	8.0413	7.6399	7.8914	7.3815	7.6199	8.144	8.0565	7.9852	7.7077	8.0056	7.9165	7.7122	7.1564	7.4588	7.388	7.3578	7.3352	7.3298	7.6436	7.4124	7.6316	7.4122	7.3992	7.4168	7.4221	7.4877
	505	73284	ENSMUSG00000046818	Ddit4l	5.8145	5.7049	5.6436	6.2897	5.8005	6.6744	6.4013	5.8962	6.1122	5.783	5.8447	5.9501	5.6322	6.0658	6.0245	5.9976	7.621	7.7433	7.5647	7.5349	7.366	7.2841	6.9478	7.2973	6.5993	7.3934	7.0804	7.0977	8.0393	7.695	7.2874	8.0612	7.9093	7.5279	7.4632	8.1014	7.4144	7.3621	7.5725	7.574	7.402	7.3327	7.8574	7.6322	7.929
	506	13590	ENSMUSG00000038793	Lefty1	2	4.1244	4.2519	2.636	4.2587	3.016	3.9892	4.1946	2.7091	3.8	3.7332	4.0747	3.3942	4.0529	3.3735	3.9206	3.7629	3.3814	2	4.881	3.1874	4.9824	2.8045	3.2441	4.2114	4.5734	4.1111	4.3331	4.2615	3.0301	5.1652	7.52	7.5267	7.3262	7.8652	7.5311	7.7052	6.9767	7.9059	7.7579	7.8188	8.078	7.7781	7.775	7.8932
	507	272636			9.2117	9.4009	9.1989	9.4067	8.9398	9.2065	9.3694	9.2449	8.9804	9.1457	9.0258	9.0824	9.1827	8.9521	9.0967	9.185	7.5491	6.6014	8.1808	7.0017	7.0965	8.2655	6.659	7.2252	7.4058	7.812	7.5238	7.7582	6.862	7.8201	7.8536	5.7725	5.938	6.271	5.8674	5.2542	6.1393	6.3047	5.7967	6.3297	5.4912	5.8176	5.4611	6.3617	5.9771
	508	12705	ENSMUSG00000051159	Cited1	8.9565	8.9598	8.7129	8.4771	9.0674	9.1401	9.3462	8.9407	8.9212	8.9485	8.9966	8.4285	8.9855	8.6347	8.5187	8.3538	5.0323	5.565	4.2577	4.6259	4.8213	3.5274	5.1439	5.5454	5.6576	4.6834	5.0667	5.4921	4.9218	4.6348	5.206	4.8524	4.295	4.5272	4.3444	4.5036	4.4047	3.951	4.0561	4.8386	4.8128	3.5368	4.7991	5.0565	4.6386
	509	244562	ENSMUSG00000036872	Abcc12	2	2.6416	4.6384	3.9145	3.1775	3.6062	3.5754	4.7403	3.7345	3.3761	3.7332	3.7695	3.3942	3.6884	3.1845	2.4311	2	3.3814	3.3651	4.0646	4.2727	4.0488	4.7223	4.2727	4.2114	4.881	2.7973	2.6972	3.0086	3.2033	3.7286	4.1876	2.9832	4.3959	3.7357	3.3793	4.2434	4.2954	4.5852	4.0836	3.77	3.3097	2.5625	3.9999	4.1245
	510	382543			6.4307	6.7571	7.3402	6.8705	7.0658	6.8636	7.1015	6.5164	6.9466	7.0328	6.227	7.1512	7.0408	7.2499	6.5007	7.1056	6.9899	7.1004	7.1047	6.8899	6.4005	7.2127	7.203	7.0926	6.5554	6.2949	6.9138	6.6923	6.5082	6.7438	7.1583	3.4739	2.9832	3.3246	3.7357	3.6486	3.3185	3.0302	3.367	2	4.0048	3.733	3.5396	3.5459	3.6961
	511	232813	ENSMUSG00000053550	Shisa7	10.5375	10.565	10.5386	10.8916	10.6678	10.6391	10.4451	10.4995	10.5091	10.7656	10.3064	10.4626	10.5826	10.4305	10.4581	10.3833	11.9631	11.7505	11.8362	11.4416	11.561	11.7557	11.5228	11.3756	11.738	11.4011	11.8747	11.8144	11.6718	11.8056	11.747	11.7151	11.8829	11.9041	11.9231	11.9472	12.0689	11.8554	12.0597	11.9155	11.8423	11.8738	11.6496	11.8938	12.0228
	512	67792	ENSMUSG00000042671	Rgs8	10.9506	11.0087	11.0928	11.2364	11.0679	10.9446	10.9648	10.948	11.1371	11.1552	11.0645	11.2369	10.9741	11.0591	11.3871	11.1819	10.6515	10.9442	10.8303	10.6866	10.8661	10.5471	10.8587	10.736	11.0726	10.99	10.9109	10.8996	10.8555	10.5731	10.6852	12.3352	11.3675	11.2788	11.2832	11.3776	11.312	11.1492	11.4536	11.3291	11.0858	11.3308	11.4259	11.1884	11.5453
	513	279653	ENSMUSG00000051323	Pcdh19	10.7404	10.8214	10.8477	11.1278	10.9678	11.1324	10.9085	11.0614	11.0699	10.9707	11.0613	11.1741	11.0855	11.2634	11.1097	11.1182	10.9336	10.518	11.1955	10.8043	10.6999	10.9995	10.8019	10.8371	10.4851	10.9208	11.002	10.7252	10.8196	10.9656	10.8193	10.7522	11.1602	11.3059	11.2343	11.0216	11.1564	11.0066	11.0378	11.1792	11.0842	10.9407	10.7942	11.2178	10.8689
	514	11856	ENSMUSG00000031355	Arhgap6	9.4138	9.3248	9.3133	9.5265	9.1753	9.6353	9.6271	9.0433	9.4385	9.3159	9.4421	9.6766	9.6273	9.5724	9.3874	9.4635	9.3034	9.1645	9.2326	9.1524	9.4829	9.4729	9.6054	9.3756	9.1706	9.1403	9.1639	9.0757	8.8467	8.975	9.1823	5.7248	5.8754	6.5588	6.0644	6.0773	6.0607	7.1561	5.5271	6.5045	6.1598	5.9809	6.2204	6.7246	5.5867
	515	22326	ENSMUSG00000006270	Vax1	6.98	6.926	6.8377	6.8976	8.0372	6.9615	6.971	5.9364	6.1471	6.5985	6.5647	6.4516	6.8257	6.9547	6.2342	6.0287	2.4243	4.6362	4.2577	3.1334	2	3.3611	3.8532	2	4.3203	5.0952	4.3386	4.6511	4.8221	4.3698	4.2015	4.0395	3.6399	3.0022	4.3444	3.5202	4.3529	3.4978	2.6102	3.5574	4.0048	3.9056	3.8569	4.2749	3.6105
	516	210417	ENSMUSG00000042581	Thsd7b	8.5871	8.4608	8.5421	7.6995	8.5795	8.4827	8.4397	8.1683	8.3434	8.4632	8.364	8.6291	8.4099	8.4787	8.2437	8.3101	7.0507	7.6074	7.4858	7.0017	6.8945	7.4692	7.0159	6.7256	7.0738	7.3771	6.8038	7.4138	7.2835	7.4157	6.9699	7.5613	7.6299	8.1991	8.0957	7.9816	8.305	7.5977	7.8543	7.8336	7.6899	8.1136	7.7336	8.2456	7.8887
	517	330998	ENSMUSG00000047606	Ankrd34c	6.296	6.9393	7.1495	6.8148	7.3375	7.1183	6.9403	7.6569	7.4014	7.1527	6.9911	7.1014	6.9218	7.5585	7.5094	7.3093	5.493	7.4835	6.5471	6.682	6.6037	5.2906	7.1585	5.7934	6.4395	6.7132	6.1376	6.9017	6.8367	6.6866	6.4309	4.5024	4.9093	4.5886	4.1049	5.3517	4.3529	3.0302	3.8608	4.628	4.9315	5.3036	5.2958	4.0426	4.5494
	518	100040525			5.6911	4.8953	4.4303	4.2019	4.2587	4.3474	4.9261	4.6941	4.7009	4.6597	4.8283	4.3264	4.8456	4.7132	4.8805	5.6428	4.839	4.6362	4.6686	4.6259	4.5337	5.5828	5.2035	4.0992	4.2114	5.0952	4.9337	3.6666	4.8728	4.5084	4.28	5.5165	5.0856	5.759	4.9985	5.3135	5.1447	5.0525	4.7065	4.7718	4.3837	5.3641	4.6967	4.8073	5.1743
	519	12354	ENSMUSG00000031883	Car7	6.4047	5.1441	5.0193	5.4557	5.0454	5.5526	5.4894	4.381	5.1074	5.5408	5.4816	4.4376	4.2952	5.2512	5.3987	5.7211	7.5804	8.1462	7.0091	7.3918	7.5245	6.8385	7.3944	7.5458	7.84	7.1079	7.5468	7.5823	7.3918	7.8333	7.6321	8.2709	7.978	7.5512	7.5495	7.6699	7.8846	8.0757	7.9122	7.9591	8.0788	8.1004	8.371	8.1802	7.7996
	520	27493			8.3595	7.8817	8.0217	8.4545	7.4562	8.2506	7.9323	8.5548	8.5201	8.1504	8.0901	8.5006	8.6948	8.3238	8.3987	8.1354	8.9314	8.6855	8.5735	8.0326	8.8968	8.9284	8.5423	8.3676	8.7805	7.917	8.3669	8.5142	8.7035	8.8206	8.9167	7.0921	7.8896	8.1743	7.2218	7.1469	7.2682	8.125	6.8661	7.3286	7.7396	6.6966	7.5028	7.6357	7.336
	521	12393	ENSMUSG00000039153	Runx2	4.3864	5.1441	4.7321	5.6905	4.2587	4.7274	5.2601	5.3882	5.6598	5.6261	5.5548	4.8924	4.8456	5.4354	5.2618	5.1145	7.1232	6.369	6.6043	6.2708	6.5258	6.8852	5.9596	5.8216	6.7035	6.1491	6.3613	6.2957	6.571	7.38	7.2779	7.6146	7.5718	7.6696	7.2367	7.4759	7.376	7.2677	7.272	7.5542	8.0063	7.7892	7.4875	7.6903	7.4075
	522	74563	ENSMUSG00000020374	Rasgef1c	8.0139	8.0678	8.129	8.2173	8.1114	7.4905	8.0874	7.8535	8.2859	8.1504	7.7978	7.7443	8.2212	8.0409	7.919	7.9033	9.7348	10.1411	9.487	9.8567	9.6978	8.8676	9.9657	9.928	9.7739	9.4514	9.8849	9.8913	9.8484	9.8667	9.5756	5.3999	5.4928	5.0483	5.7885	5.4252	5.6095	6.2855	5.1532	5.5469	5.5665	5.505	5.224	5.9106	5.1442
	523	16782	ENSMUSG00000026479	Lamc2	3.9572	4.7225	5.0919	5.261	5.0995	4.4855	4.9874	3.5331	5.2099	5.8197	4.768	4.8122	4.9096	5.3331	5.1627	5.1714	8.8179	9.1964	8.0428	8.5745	8.4729	7.6514	9.1658	8.8913	8.9255	8.0565	9.2917	9.0691	8.9828	8.876	8.5831	6.0684	5.7931	6.2896	5.768	6.5248	5.8149	6.8258	6.0922	6.5846	6.5043	5.6577	6.1052	5.8031	5.6309
	524	629147	ENSMUSG00000069372	Ctxn3	7.5761	7.0036	7.5284	7.439	6.7647	7.0532	7.3199	7.8847	7.7803	7.6824	7.2553	7.4047	7.9213	7.3967	7.8961	7.7152	6.0346	6.1582	5.8632	6.046	6.2633	5.6564	6.6801	3.5441	5.6576	6.443	5.4543	5.7133	5.7438	4.6941	6.1467	6.8798	4.7785	5.7045	5.3945	6.508	4.8406	6.432	5.2759	5.0223	5.5665	4.5508	5.7942	5.9448	4.802
	525	18005	ENSMUSG00000026622	Nek2	3.7253	4.1244	3.8109	3.0759	4.6697	4.4855	3.2142	4.2594	3.6397	4.6597	4.5705	4.0747	3.7136	4.6293	3.6904	4.7162	4.3515	5.4102	4.6686	4.5298	5.9119	5.6564	4.9484	6.2109	5.0466	4.1818	5.7595	5.4517	5.475	5.8367	5.206	5.8853	4.9402	5.2519	4.2881	4.1165	4.9492	5.5465	4.5852	4.9025	5.3703	5.0327	4.1169	3.5459	5.0819
	526	15444	ENSMUSG00000028785	Hpca	11.458	11.3022	11.4938	11.2529	11.3821	11.3514	11.2145	11.3606	11.3009	11.3465	11.259	11.2107	11.0638	11.1783	11.2339	11.3514	12.0522	12.2594	11.9777	12.0722	12.0164	11.846	11.9608	11.7376	12.323	12.46	12.2621	12.1413	12.3422	12.131	11.9811	14.7877	14.6854	14.763	14.911	14.7192	14.9067	14.5581	14.9595	14.8075	14.6726	14.9871	14.8986	14.6342	15.0285
	527	12822	ENSMUSG00000001435	Col18a1	8.4287	8.5015	7.9983	8.7163	8.118	8.5937	7.7932	8.3981	8.0892	7.9745	7.6801	8.019	7.8334	7.8686	8.1563	7.8257	7.9025	7.3192	7.5743	7.5472	7.3547	8.6595	7.6301	7.366	8.6352	6.9627	7.5238	8.0831	8.1868	8.2876	7.9225	8.0516	6.4702	6.6907	6.8755	6.6756	7.0898	6.4493	6.7007	6.0763	6.65	6.323	7.2278	6.9485	6.5018
	528	109050	ENSMUSG00000048458	Fam212b	7.0233	7.17	7.796	7.5369	6.938	7.353	7.3897	7.6867	7.1408	7.1455	7.1172	7.0323	7.4047	6.9803	7.437	6.8682	11.0443	11.0766	10.802	10.9047	10.7994	10.3476	11.0917	10.8275	10.9046	10.4444	11.0509	10.9467	10.939	10.8522	10.6366	11.0953	11.0874	11.0302	11.1221	11.1352	11.0332	10.8565	11.2775	11.038	11.0111	11.2895	11.0634	11.1092	11.2119
	529	94047	ENSMUSG00000094626	Cecr6	7.948	7.7898	7.7351	7.5369	8.0849	7.6459	7.8018	7.8587	7.465	7.7314	7.6386	7.7658	7.7572	7.6989	7.6162	7.9769	10.7983	10.7495	10.5069	10.6428	10.3478	10.301	10.7123	10.6668	10.6623	10.319	10.6338	10.6513	10.6291	10.6714	10.4434	10.0761	10.283	10.1155	10.2329	10.306	10.4013	10.247	10.2774	10.2805	10.1464	10.2236	10.0363	10.3189	10.2444
	530	17702	ENSMUSG00000021469	Msx2	2	3.2631	2.504	2	2	2	3.9892	5.1353	2.5092	3.9399	3.456	3.5887	3.2034	2.9458	2.7105	3.7814	3.4382	4.4368	4.6686	4.4268	3.694	4.9824	2.8045	5.2035	3.9653	5.1345	2.7973	4.1432	4.1006	3.358	4.6188	3.7842	3.394	3.5879	3.6491	3.2231	4.8777	3.6251	3.367	4.0836	3.3258	3.9056	3.2812	4.4113	4.1849
	531	18423	ENSMUSG00000005917	Otx1	5.7947	6.2631	5.8873	4.9864	5.8005	5.8876	6.1019	6.2232	6.0765	5.9412	5.9019	5.5659	5.9984	6.0817	5.8122	6.1469	6.308	6.0918	6.1201	6.046	6.6225	6.1399	6.123	6.2735	5.9899	6.346	5.7197	5.8748	6.4426	5.7555	6.7255	5.7248	6.1247	6.1539	6.3102	6.0191	6.1844	5.9385	6.0238	6.3754	6.3207	6.0743	6.2747	6.173	5.6947
	532	319455	ENSMUSG00000055214	Pld5	8.7166	8.6577	8.886	8.7612	8.6263	8.8129	8.7715	9.1282	8.7643	8.6658	8.9294	8.8956	8.9517	8.8608	8.9706	8.9614	6.7543	6.5529	7.7951	7.1219	7.5245	7.4066	7.2882	6.6331	7.5911	7.6655	7.8066	6.5272	6.8992	6.7155	7.5395	7.7034	5.9684	5.6187	5.5699	6.3184	6.4783	5.8104	4.9715	5.3317	5.6381	5.8602	6.2747	6.032	5.6737
	533	211134	ENSMUSG00000036306	Lzts1	6.8515	7.0036	7.5671	6.7118	7.4142	6.8636	6.8441	6.8041	7.1666	7.403	6.8957	6.7169	7.1105	7.1555	7.0225	7.1487	10.5003	10.061	10.0539	10.1554	9.9847	9.714	10.1869	9.9616	10.1747	9.9955	10.2404	10.246	10.045	10.1822	10.0627	8.7233	8.7717	8.9292	8.7883	8.9106	8.8838	8.794	8.7601	8.8209	8.8443	8.7593	8.3998	9.0823	8.6698
	534	242735	ENSMUSG00000028584	Lrrc38	4.6298	4.5261	3.8944	2	3.9408	5.2764	4.4907	4.3215	5.2744	4.488	4.8862	4.4376	4.1962	3.9179	4.9416	4.1642	5.1481	3.14	2.9602	3.3739	4.5337	4.3445	4.1242	4.9715	4.6049	2.7718	4.4402	3.6666	3.5964	3.9508	4.28	5.7248	5.4928	5.2134	4.7295	5.0368	5.0502	4.7512	5.0652	4.628	4.4646	4.5508	5.6093	4.3784	4.4043
	535	380683			6.6782	6.1985	5.8459	6.1391	6.7647	6.4898	7.1955	5.9364	5.9037	6.3198	5.8447	6.3977	6.6118	6.341	6.0245	5.6428	6.4043	5.8722	6.5471	6.1787	6.3562	6.9743	6.7618	7.1715	6.204	6.9736	6.9659	6.5465	5.8986	6.4491	6.934	4.7607	5.4928	6.5741	5.848	6.2288	5.0824	6.6573	5.6227	6.4197	6.579	5.7512	4.9843	5.9671	5.0169
	536	13489	ENSMUSG00000032259	Drd2	7.4799	8.1268	7.9058	8.5038	8.4811	7.7591	8.1822	8.3616	8.2137	7.869	8.2083	7.8784	8.2086	8.1199	7.9037	8.2974	5.8756	6.5773	5.8941	6.3003	6.6954	5.2436	7.1883	5.2868	7.4663	7.9283	5.6365	6.8405	7.443	6.7155	6.1256	4.6629	5.1664	5.3963	5.3945	5.4072	5.2333	5.1824	5.0652	5.133	5.0931	5.3641	5.0687	5.2689	5.2039
	537	20272	ENSMUSG00000034810	Scn7a	8.9386	8.8555	8.8809	8.8813	8.5262	9.2165	9.3166	8.9821	9.357	9.1725	8.9086	8.9852	9.2736	9.5136	9.1233	8.2716	5.493	7.2295	7.5159	7.5349	7.3771	7.4066	7.4072	6.8403	7.4424	6.6332	7.768	6.4677	7.443	7.0912	7.3614	5.7958	6.3137	6.6766	6.419	6.2288	6.5832	6.8651	6.047	5.961	5.8029	6.2608	6.7413	6.5655	6.1388
	538	22415	ENSMUSG00000000125	Wnt3	6.6453	6.8012	5.7371	5.7511	7.208	6.4898	5.8279	6.5164	6.6265	6.7863	6.951	6.3977	6.056	5.8603	7.2686	6.5628	4.6941	4.9675	3.5316	2.8446	4.885	4.5898	4.3522	3.2441	4.9138	4.3244	4.4402	4.9115	4.5377	3.8502	3.7286	6.4074	5.6507	5.8114	5.5699	5.7878	5.8895	5.9385	5.9273	5.3774	5.7714	6.1101	6.7794	5.6598	5.8522
	539	14313	ENSMUSG00000021765	Fst	5.02	4.1244	3.6279	3.0759	3.1775	5.1982	4.7248	2	4.7918	4.4416	3.8541	4.2061	4.3879	4.7925	3.9501	4.3726	5.9413	5.9492	5.3862	5.3991	4.9461	5.3803	5.0166	4.8671	5.4335	5.6228	5.8728	5.4921	5.9702	4.9095	6.1042	5.1699	5.5135	5.4303	5.3677	5.3889	4.8777	5.4465	5.1953	5.4217	5.9508	5.7052	5.1867	5.1762	6.0921
	540	20716	ENSMUSG00000021091	Serpina3n	9.8046	9.6282	9.8619	9.6979	9.5815	9.65	10.3061	9.8958	10.243	10.4849	10.0819	10.0963	10.3154	9.988	10.0348	10.2411	7.8088	7.6193	8.0836	7.7421	8.0337	7.7131	7.673	8.7735	7.9711	7.9614	7.7778	7.9589	8.0503	7.9775	8.0455	10.0266	10.1153	10.0295	10.1085	10.2784	10.2062	10.0511	10.3208	10.0264	9.93	10.3643	10.2558	10.053	10.2506
	541	268345	ENSMUSG00000035681	Kcnc2	10.5157	10.4345	10.3407	10.4259	10.5561	10.2867	10.3166	10.4732	10.5674	10.4604	10.6269	10.8692	10.5503	10.4912	10.9757	10.6213	10.3496	10.5949	10.456	10.5308	10.5762	10.3697	10.5863	10.458	10.4284	10.2757	10.7347	10.4025	10.7586	10.5503	10.561	10.7875	11.1846	11.3415	11.115	11.1896	11.1531	11.2234	11.0428	11.14	11.0518	11.0145	11.1877	11.1621	11.0772
	542	60425	ENSMUSG00000024871	Doc2g	6.1936	6.4957	5.9275	7.3438	6.2465	6.703	5.9252	7.1924	6.1811	5.9075	6.4156	5.9122	5.7763	6.0005	6.2096	6.0592	6.9264	6.528	7.0091	6.4653	6.0848	7.4172	6.6801	6.7405	7.1496	6.5043	6.2814	6.1769	5.7438	6.8648	7.0393	6.6438	6.1775	6.0041	6.1926	6.1	6.3652	6.3788	5.741	6.0763	6.3636	5.881	6.6346	5.9448	6.5254
	543	320492	ENSMUSG00000057715	A830018L16Rik	8.7986	8.927	9.1824	9.5628	8.8676	9.1137	8.9204	8.9183	9.1208	8.9914	9.4421	9.5086	9.3902	9.5121	9.5963	9.6969	10.4728	10.4876	10.5633	10.2394	10.2974	10.4168	10.5145	10.3277	9.8417	10.2602	10.4267	10.1934	10.4959	10.3552	10.4056	10.5694	11.0225	11.1324	10.9475	10.9669	10.6952	10.9696	10.7659	10.991	10.9154	10.8531	10.7039	10.9534	10.6491
	544	214604	ENSMUSG00000058589	Anks1b	7.2072	7.0409	7.248	6.5335	7.65	7.2009	7.4344	6.9289	6.9466	7.1237	6.951	7.3489	7.1507	7.2286	6.9501	6.8156	7.3935	7.3479	7.4959	6.6366	7.6213	6.5792	6.8202	5.9549	6.7035	6.9184	7.5916	7.1865	7.0827	6.8388	7.5395	3.8744	3.9137	3.9101	3.4583	4.8887	3.5198	5.0971	4.1446	2.7205	3.77	3.8219	3.4162	3.7136	3.5195
	545	217371	ENSMUSG00000025170	Rab40b	7.8263	7.4542	7.4269	6.6009	7.7121	7.7316	7.3318	7.4222	7.43	7.3221	7.3406	7.3489	6.9825	7.5642	7.372	7.3954	9.6191	9.7393	9.6678	9.5759	9.8434	9.0999	9.6702	9.6867	9.4295	9.4436	9.8438	9.1053	9.6519	9.8159	9.6083	9.594	9.6529	9.6337	9.5458	9.7297	9.4746	9.417	9.7411	9.7508	9.8265	9.8377	9.6563	9.4282	9.6851
	546	237987	ENSMUSG00000050201	Otop2	2	2.3562	2.7024	2	2	2	2.4115	2	3.1825	2.6153	2	2	2.4067	2.2452	2.7105	2	4.445	5.297	4.0537	4.4268	5.061	4.3445	2.8045	4.0992	5.2252	4.5734	4.1111	4.7872	4.8728	4.5084	3.3464	3.3536	2.9832	3.7035	3.4583	3.3033	3.2062	3.8503	2.6102	2.7205	2.38	2.8837	2.7784	2	3.3182
	547	225583	ENSMUSG00000050875	A730017C20Rik	11.6645	11.7836	12.0258	11.8555	11.7269	11.7766	11.7249	11.7436	11.7713	11.6831	11.8306	11.8751	11.8639	11.8064	11.7469	11.8969	9.3282	9.2082	9.5755	9.3693	9.5459	9.6297	9.1546	9.3346	9.3289	9.5105	9.8252	9.3084	9.2531	9.4834	9.7648	9.105	9.1364	9.3172	9.1457	9.2282	9.1983	9.2713	9.0539	9.3737	9.0287	9.2506	8.8657	9.2835	9.0099
	548	17202	ENSMUSG00000047259	Mc4r	5.9098	6.5135	6.5465	5.381	5.5516	6.2396	6.0163	5.9561	5.9439	6.1997	6.5647	5.3556	6.2163	5.8967	6.1332	5.9658	5.4485	4.6362	5.6624	6.0108	6.0573	6.3093	5.9245	5.6748	6.0225	6.5192	5.4049	5.6787	5.5392	5.3013	5.9921	6.4074	6.1513	6.6481	7.1367	6.7913	6.8305	6.1857	6.7296	6.4838	6.6149	6.9641	5.9801	6.6368	6.8581
	549	217143	ENSMUSG00000070337	Gpr179	8.4319	8.3162	7.9455	8.7427	8.0646	8.4991	8.2337	7.864	8.2422	8.3233	8.3992	7.9551	7.9057	8.0204	8.0633	7.852	5.0323	4.8113	4.988	5.286	5.6799	6.1399	6.3246	6.568	5.6576	6.5773	5.5021	5.3674	5.4418	5.2627	6.3052	3.3536	4.4319	4.463	4.1049	4.1165	3.7773	3.7421	3.367	3.8443	4.1092	3.5368	4.6426	5.0143	4.1245
	550	74782			4.9854	5.9598	5.6675	4.0168	5.8328	6.5223	5.6497	6.069	5.6598	6.1284	5.8447	6.1591	6.6497	6.3144	6.1846	5.6825	7.5907	7.8576	8.0633	7.8555	7.7553	7.4278	8.0351	7.7207	7.4898	7.5025	7.5122	7.8543	8.0393	7.9715	8.0114	8.5832	8.4611	8.2283	8.4403	8.4509	8.3151	8.0923	8.5039	8.4824	8.3155	8.5475	8.5505	8.241	8.3381
	551	53404	ENSMUSG00000036816	Atoh7	4.6739	3.5656	3.8944	2	4.3508	2	2.7312	3.9014	2.2769	3.3761	2.368	2.8505	2.7237	2.7999	2.3986	2.7625	2	3.14	3.3651	3.5799	2.7126	3.8115	3.318	2	4.5161	4.1818	3.5082	3.9245	3.9195	2.334	3.0204	3.8744	4.0333	3.1724	2.2561	2.9517	3.7773	3.8503	2.8397	2.9793	3.141	2.8837	4.3371	3.6599	3.6105
	552	74470	ENSMUSG00000021572	Cep72	5.381	4.7824	5.1609	2.636	4.3508	5.0279	5.1572	5.5525	4.8353	4.5764	5.4046	5.1749	4.475	4.2899	5.1627	4.7907	5.0323	3.5881	4.7384	5.029	4.9461	4.5126	5.6943	5.6116	5.3331	4.3244	4.3386	4.9115	4.0129	4.1332	5.6221	5.6244	5.2916	5.4303	4.3985	4.9646	4.8406	6.0561	4.4528	4.7718	4.4646	4.699	4.3371	4.9927	4.9832
	553	68355			8.7911	8.8415	9.0589	9.194	8.7998	9.0595	8.9782	8.9652	8.8751	8.7513	9.1011	9.0522	8.9171	8.9172	8.8405	8.9573	8.4287	8.2334	8.6158	8.2668	8.7461	8.3456	8.4218	8.6293	8.1878	8.6546	8.129	8.5191	8.3523	8.3488	8.483	7.9924	8.1664	8.388	8.4371	8.0088	8.463	8.2879	7.8345	8.2195	8.2712	8.3487	8.1369	7.9972	8.0023
	554	237362	ENSMUSG00000020090	Npffr1	7.0147	6.7571	7.0346	6.1162	7.208	6.8887	6.5306	6.7028	6.5633	6.8139	6.5824	6.626	6.4492	6.0817	6.3056	6.0592	6.0041	4.2053	5.7325	4.881	3.9539	5.0926	4.1242	5.2035	5.9899	4.881	5.5483	5.7801	5.1026	5.4463	5.0355	3.9593	4.8454	5.1332	5.4723	4.8887	5.0173	5.863	3.8608	3.9689	4.9874	4.699	3.4162	4.5058	4.4543
	555	103712	ENSMUSG00000018451	6330403K07Rik	13.7156	13.8966	13.8584	13.7146	13.921	13.8066	13.8963	13.789	13.6873	13.7008	13.7063	13.6748	13.7101	13.695	13.5901	13.7073	12.3145	12.086	12.7223	12.4769	12.4147	12.7637	12.3129	12.0889	12.5186	12.6985	12.5652	12.5336	12.3962	12.4066	12.6494	11.5267	11.584	11.5265	11.7142	11.6023	11.7486	11.6629	11.5509	11.7474	11.7089	11.6252	11.5622	11.7159	11.659
	556	16438	ENSMUSG00000030102	Itpr1	11.4425	11.6021	11.5552	11.8082	11.7945	11.7966	11.7433	11.5871	11.5255	11.7797	11.7909	11.6805	11.8037	11.7282	11.7999	11.5956	13.373	13.6443	13.255	13.323	13.4564	12.8732	13.6259	13.408	13.0957	13.3329	13.4021	13.254	13.6736	13.2724	13.2795	14.2515	13.6972	13.3684	13.5262	13.501	13.6459	13.2983	13.6054	13.5869	13.6089	13.4125	13.5708	13.5223	13.4781
	557	268958			4.2178	6.9127	5.6675	5.0839	3.5325	5.4211	7.5608	7.1588	7.597	6.5772	5.5901	3.1406	4.1962	5.8967	4.4476	6.4293	4.445	6.424	7.1179	3.3739	6.7817	3.6764	6.7418	8.6412	7.6019	6.2419	5.6787	6.2256	2	3.358	6.6238	3.688	6.3602	6.4961	5.1	3.6486	6.5491	7.7311	6.4632	7.1947	6.7176	6.0001	4.4671	3.7655	5.5867
	558	16538	ENSMUSG00000040164	Kcns1	4.6739	6.0841	5.5945	4.2863	5.6272	5.2764	5.8279	4.4381	5.507	5.667	5.2806	5.2978	5.472	5.7652	5.3987	5.5168	8.1518	8.0533	8.495	8.3252	7.6119	8.0569	8.1305	7.4406	7.6445	8.3802	8.1442	8.2455	8.4846	8.1462	8.5754	7.7578	7.7306	7.8561	8.0372	7.7931	7.7904	7.7311	7.8144	8.0814	7.7638	7.9005	7.5981	7.8579	7.9938
	559	235599	ENSMUSG00000037977	6430571L13Rik	5.8145	7.0162	7.0619	7.3438	7.3262	6.7855	6.741	5.9755	6.9367	7.1952	6.8086	7.1674	6.6866	6.4428	7.1701	7.1344	6.1777	5.9862	5.7993	6.3574	6.1381	5.7933	5.4203	3.7923	6.4151	4.5734	5.6365	6.3184	5.9229	5.5462	5.4631	6.9541	5.4928	5.2519	5.5699	6.0072	5.6095	5.7276	5.6831	5.5469	5.6028	5.7052	6.2569	5.1953	5.6524
	560	11516	ENSMUSG00000024256	Adcyap1	10.8882	10.6194	10.9136	10.9939	10.6554	10.7866	10.6343	10.8487	11.0517	10.7871	10.9066	11.0957	11.319	11.0344	11.0109	11.2236	8.2196	8.3586	8.2895	8.6846	8.4832	8.6505	8.9476	8.3676	8.8088	8.343	9.1602	8.8261	8.7819	8.412	8.6983	6.452	6.9598	6.8497	6.2229	6.9049	6.1695	6.9886	6.1994	6.7148	6.5421	6.4678	6.4103	6.8619	6.5827
	561	100040591	ENSMUSG00000079436	Kcnj13	2	2.6416	2.504	2	2.9608	5.0279	2.9928	3.3063	3.0413	2.6153	3.6013	3.1406	2.9834	5.279	2	2	5.3061	6.0223	5.2494	6.5163	5.4463	7.2127	5.8518	6.601	5.3842	6.1298	2.7973	5.9346	5.4418	4.2165	6.0825	3.4739	5.0856	5.0483	4.9266	7.1028	9.2855	4.806	5.0652	4.9637	4.2979	4.7899	9.0867	6.9316	5.0819
	562	57276	ENSMUSG00000001943	Vsig2	4.7167	4.9486	4.7768	5.561	5.1516	5.6141	4.8621	4.381	4.8353	4.6597	4.4981	5.3556	4.7086	4.6718	4.9416	5.2261	7.109	7.1664	7.219	6.9654	7.0555	6.6531	6.7815	6.9466	7.0582	6.9184	7.1115	7.2818	6.9591	6.903	7.1374	6.452	7.301	7.154	7.1447	7.1469	7.2612	6.8906	7.3854	7.1947	7.1063	7.3477	7.1906	6.8499	7.2677
	563	18166	ENSMUSG00000036437	Npy1r	7.9747	8.121	8.2957	8.618	7.995	8.4323	8.0447	8.3505	8.4345	8.401	8.3435	8.3454	8.6719	8.5287	8.6202	8.5595	8.7958	8.5313	8.51	8.3536	8.3929	8.1555	8.3244	8.7145	8.195	8.0411	8.7248	8.2035	8.8812	8.5903	8.4452	8.7652	9.2839	9.2594	8.8958	9.201	8.8952	9.305	9.1236	9.1219	9.42	9.3228	9.1462	9.0962	8.9216
	564	67451	ENSMUSG00000041957	Pkp2	6.1474	6.5485	6.7507	5.8375	6.2703	7.2404	6.6301	6.9487	6.4421	6.832	6.6837	6.7388	7.1105	6.8567	6.9048	6.7044	7.9748	7.4835	7.8195	7.4455	7.2252	7.8761	8.0269	7.5458	7.9114	6.7767	8.0905	7.3602	7.4597	7.5421	7.8146	8.9372	9.3181	9.342	9.5185	9.692	9.4821	9.4518	9.464	9.396	9.2361	9.7023	9.4554	9.377	9.5421
	565	58222	ENSMUSG00000020732	Rab37	6.4561	5.9069	5.8873	6.4074	6.6241	5.7298	5.402	5.8962	6.6265	6.4659	6.227	6.2533	5.9073	5.9495	7.2078	6.3819	3.6096	4.8113	3.5316	4.4268	5.1151	5.2906	3.5192	3.4019	5.2252	4.5734	3.3078	4.5008	5.0595	3.7419	5.0355	6.3138	5.9684	5.3259	5.3945	5.7309	5.6314	6.0334	5.5271	5.3774	5.8029	5.3036	6.8645	5.8991	5.609
	566	18390	ENSMUSG00000000766	Oprm1	6.7521	6.7719	6.5847	6.4628	6.8773	6.6155	6.284	6.4896	7.1321	6.8498	6.2711	6.626	6.5728	6.6163	6.6175	6.5839	5.493	4.8915	5.954	5.286	3.9539	5.2436	5.316	5.5454	5.6985	4.881	5.0017	5.08	5.6007	5.5137	5.5606	3.2223	4.1437	4.1733	5.2251	3.6486	4.7633	3.6251	3.7523	4.3813	3.77	2.8837	3.4162	4.4113	3.6961
	567	621603	ENSMUSG00000075296	Aldh3b2	6.5058	6.858	7.0619	5.2187	6.7813	6.1174	6.7762	6.1736	6.0944	6.8674	6.6507	6.3699	6.6683	6.5721	6.3736	6.4976	5.7711	5.7047	6.4464	6.8103	6.6037	6.1654	6.0272	5.7054	6.5554	6.8134	6.4853	6.3184	6.5863	6.2263	6.9699	4.5579	3.6399	4.6475	3.3526	4.398	4.4547	3.951	4.3817	4.3813	4.2979	3.9056	3.7587	4.0426	4.2988
	568	19736	ENSMUSG00000038530	Rgs4	11.4325	11.4936	11.7048	11.5782	11.3065	11.2915	11.4471	11.7633	11.7103	11.6906	11.731	11.7702	11.7572	11.6519	11.9674	11.7424	11.6728	12.1491	11.783	11.9871	11.9453	11.6133	12.0524	11.8578	11.6285	11.6492	12.2363	11.8174	12.0133	11.6738	11.7556	11.1889	11.4977	11.5455	11.4527	11.553	11.4505	11.4211	11.3286	11.2916	11.534	11.4189	11.4408	11.5486	11.2948
	569	238271	ENSMUSG00000034402	Kcnh5	7.3432	7.4169	7.4887	6.9109	7.7121	7.9261	7.5405	7.8109	7.6526	7.5845	7.1764	7.7004	7.8168	7.625	7.6068	7.6863	7.7273	8.4072	7.5356	7.619	8.0053	7.0028	8.5365	7.6279	7.9458	7.8596	8.4725	7.7747	8.2264	7.4591	7.5553	6.8243	6.7575	6.7591	6.432	6.7561	6.6915	6.4834	7.072	6.7843	6.1353	6.368	6.7794	6.678	6.8109
	570	102688			2.2536	2	3.6279	2	2	3.016	3.4061	2.8811	3.3111	2.7733	3.2945	4.2061	3.975	3.5122	2.7105	2.4311	7.3935	7.2899	6.3381	6.9092	7.0275	5.3803	6.5015	7.2566	6.8917	6.5192	6.9659	6.856	6.4087	6.4318	6.7255	4.1876	4.1437	3.8105	3.1145	3.6486	2.9514	5.1824	3.0376	3.8443	4.2979	3.4277	3.5396	4.536	3.2059
	571	11838	ENSMUSG00000022602	Arc	8.2361	8.2802	7.9108	8.5343	8.144	7.7727	8.1888	8.833	8.0529	8.1683	7.6883	8.0543	7.874	8.0368	7.6348	8.1425	10.9803	10.5585	10.465	10.7088	10.3841	9.5546	11.146	10.3878	11.1848	10.3401	9.9617	10.8635	11.0234	10.5331	10.5883	10.9244	10.9176	10.4233	10.9983	10.6143	11.2313	10.7505	10.7279	11.3784	10.9126	10.8015	11.2169	10.9818	11.1306
	572	72978	ENSMUSG00000026514	Cnih3	9.0347	8.8729	9.1424	8.7125	8.3309	9.0923	8.8725	8.9941	9.0303	9.1672	8.7384	9.112	9.0578	8.7731	8.7957	8.7994	10.8516	10.3666	11.0674	10.8473	10.7479	10.8671	10.442	10.4216	10.4953	10.6455	10.9988	10.6014	10.67	10.7865	10.7869	10.3452	10.4582	10.4138	10.3414	10.4735	10.3804	10.3849	10.4685	10.5806	10.8176	10.4365	10.2626	10.446	10.301
	573	18424	ENSMUSG00000021848	Otx2	4.1569	5.5753	5.6436	4.5816	4.3508	4.1947	5.4894	4.4381	5.9636	5.4025	6.0099	5.1749	5.472	5.3063	5.3545	5.3788	2	4.6362	2	3.3739	2.7126	5.5828	4.5491	6.1455	2.7876	4.9265	3.5082	4.4194	4.2615	2	4.28	5.5715	5.3154	5.0038	4.3985	6.347	7.5062	5.4465	5.1532	3.9689	5.2837	5.0327	7.4565	6.0737	5.8334
	574	329934	ENSMUSG00000052135	Foxo6	7.4799	7.7528	6.7619	7.5283	7.8127	7.9261	7.5199	6.6433	7.3196	7.1882	7.4308	7.1182	7.0265	7.0303	6.8581	7.0307	8.3156	7.7216	8.0359	8.4019	7.9836	8.283	7.7944	7.2252	8.5706	8.743	7.698	8.5481	8.6644	8.3672	8.3068	9.0909	8.7588	9.0705	9.714	8.83	9.5854	8.996	8.9254	9.0212	9.0938	8.8961	8.1418	8.9273	9.1397
	575	19711	ENSMUSG00000033061	Resp18	12.7297	12.777	12.9842	12.7822	12.8755	12.8103	12.6358	12.8149	12.6028	12.7205	12.7255	12.6712	12.7038	12.6351	12.6672	12.7906	10.5694	10.2891	10.7051	10.8696	10.5321	11.2182	10.7591	10.3313	10.7932	10.9819	10.829	10.9503	10.5348	10.6444	11.0642	9.429	9.4543	9.401	9.5755	9.3942	9.7345	9.6907	8.9285	9.4235	9.3788	9.1934	8.7522	9.6417	9.1774
	576	12308	ENSMUSG00000003657	Calb2	11.8115	11.7674	11.7866	11.555	12.0155	11.7244	11.5364	11.6568	11.5784	11.7709	11.8246	11.8892	11.7019	11.7146	11.837	11.7948	9.5471	8.3796	9.7075	9.5113	9.398	9.6182	9.0928	9.4015	9.4204	9.54	9.5031	9.4663	9.0804	9.4277	9.5281	8.6988	8.5058	9.046	8.9869	8.7957	8.755	9.1835	8.1607	8.6406	7.8938	8.1268	8.2898	9.1846	8.5825
	577	140919	ENSMUSG00000030500	Slc17a6	12.2278	12.1819	12.3891	12.4335	12.1897	12.1688	12.2205	12.5192	12.6008	12.4712	12.4942	12.7999	12.775	12.6146	12.8144	12.7892	9.3942	10.0436	10.211	10.2337	9.9478	10.1322	10.6113	9.8968	10.3374	10.1412	10.8976	10.2025	9.9359	9.9827	10.2608	8.6771	8.9571	8.6732	8.0114	9.2282	8.2423	8.2927	8.6396	8.3795	8.848	8.5311	9.5205	8.6931	8.3281
	578	104080	ENSMUSG00000040258	Nxph4	9.7959	9.2472	9.5065	9.2762	9.2309	9.103	9.0977	9.6044	9.3938	9.1109	9.0795	8.8907	9.0857	9.0682	9.1001	9.4173	6.8936	7.3479	6.8915	7.8153	7.3206	7.4794	7.4693	8.083	8.4379	7.4333	7.5805	7.8925	7.9942	6.9155	7.647	5.7004	5.3618	4.3959	4.6424	4.9144	5.1139	5.2629	4.9715	5.0787	5.7063	4.699	3.6533	4.6507	4.5494
	579	17268	ENSMUSG00000020160	Meis1	5.7746	6.7571	6.6582	6.31	7.106	6.7585	6.668	6.8574	6.6141	6.6401	6.6507	7.0499	6.6308	6.8474	6.8581	7.2178	5.9413	7.4574	7.0371	7.1054	7.2617	7.4066	6.801	6.5172	7.9794	7.2217	7.352	6.946	6.9708	7.069	7.0837	6.813	5.1923	4.5272	4.8509	4.8624	5.2043	5.5783	4.3817	5.3774	5.2837	4.4428	4.1941	5.6181	4.243
	580	64406	ENSMUSG00000075304	Sp5	4.4385	4.9486	3.8944	4.4415	3.5325	4.4855	3.5754	2.5068	3.6397	3.6451	3.456	3.5887	3.2034	2.7999	3.5407	2	2	3.14	2.9602	2.8446	3.3767	2.957	4.5491	2	3.4934	4.1818	2	4.2412	2	3.4976	3.0204	4.1876	3.0974	2.5864	2	2.4858	3.2062	3.0302	2.8397	2	2	2.7083	2.3085	3.4222	2.6416
	581	72097	ENSMUSG00000026090	2010300C02Rik	9.318	9.3937	9.1165	8.8677	9.5575	9.4453	9.3866	9.2998	9.0763	9.3191	9.2351	9.0824	9.3036	9.183	9.1429	9.1106	12.52	12.5284	12.1304	12.369	12.2004	11.6081	12.4482	12.2029	12.4658	12.1031	12.6643	12.2575	12.4773	12.4321	12.2408	12.609	12.6163	12.5287	12.5099	12.7548	12.6298	12.425	12.8954	12.6586	12.7713	12.8511	12.5302	12.5732	12.7127
	582	50781	ENSMUSG00000030772	Dkk3	10.8327	10.933	10.8704	10.6039	10.7119	10.8975	10.961	10.8087	10.875	10.8937	10.7977	10.8543	10.8079	10.9204	10.7974	10.8713	11.5505	11.6781	11.5674	11.6863	11.5481	11.5072	11.4078	11.7119	11.3924	11.4423	11.7615	11.4766	11.7853	11.4214	11.4932	13.0961	13.142	13.0592	13.2336	13.2457	13.1605	12.916	13.2573	13.1562	13.0726	13.2321	13.1755	13.1351	13.2373
	583	14706	ENSMUSG00000021303	Gng4	10.7083	10.5703	10.7683	10.8111	10.6911	10.6774	10.6919	10.7243	10.7607	10.7854	10.9039	10.9215	10.8924	10.9021	10.8669	11.0402	10.5259	10.74	10.6754	10.6839	11.1032	10.7874	11.0799	10.5044	10.8351	10.6015	10.8897	10.7167	10.5601	10.5229	10.4844	8.6771	8.7501	8.9082	8.7498	9.02	8.8793	9.4496	8.8746	8.9774	8.9323	8.7223	8.6463	9.1399	8.6591
	584	14178	ENSMUSG00000027208	Fgf7	5.6476	5.3562	4.8202	2.8726	4.8061	4.4855	5.309	5.5525	5.1424	5.1377	5.4816	5.0406	5.0295	5.2512	4.7501	5.1714	3.7629	3.9294	3.9398	2.8446	4.1741	3.6764	3.5192	3.2441	2.4469	4.7856	2.7973	3.1652	3.1795	4.0449	4.2015	5.3378	4.8454	4.6475	4.7295	4.323	4.7231	5.0971	4.5852	5.0223	3.77	4.7452	5.224	4.2749	4.7628
	585	18991	ENSMUSG00000090125	Pou3f1	7.957	7.257	7.5479	7.2628	7.0244	7.474	7.5809	7.4079	7.2571	7.0092	7.3302	7.6436	7.1769	7.5642	7.3384	7.7436	7.7273	7.9353	7.8978	8.1665	8.0546	7.3072	8.4893	7.6438	9.0883	8.4125	8.2318	8.292	8.3701	8.053	7.6908	10.6806	10.752	10.4821	10.5936	10.3928	10.5525	10.4379	10.387	10.73	11.085	10.8062	10.7072	10.3527	10.6082
	586	320014			6.908	6.5656	5.8034	6.8841	6.7135	6.5223	6.551	6.3772	6.5107	6.6195	6.763	6.8231	6.7404	6.3009	6.8261	7.0909	3.9014	3.3814	3.5316	5.029	4.4518	4.9824	3.5192	4.3522	4.6886	3.5293	3.075	3.9245	2.8147	2.8332	4.6188	3.2223	3.5625	3.5879	3.9683	4.2439	3.9957	2.6052	3.9617	3.5574	2.929	3.5368	4.4036	3.1375	3.3182
	587	228767			2	2.3562	2	4.1123	2.7057	2	2.4115	2	3.1825	2.7733	3.456	2	3.5627	3.603	3.8261	3.2587	2	2.4868	2.3953	2.4833	2.3998	3.6764	2.4576	3.5441	2	2	2.453	3.8013	2.5907	3.625	2	3.688	3.85	3.8105	3.2385	2.7375	2.9514	2.3341	2.8397	2.9793	4.2979	2.7083	3.1322	3.4854	3.2059
	588	13656	ENSMUSG00000071341	Egr4	5.9818	5.7356	4.9032	5.5268	5.6991	6.2	5.4894	5.7231	5.6598	5.687	5.4436	4.8924	5.5543	5.7652	5.0564	5.2261	8.9594	8.9091	8.9606	9.4002	8.6758	8.2115	9.0405	8.8231	9.7882	9.1306	9.322	9.3693	9.4928	9.4771	9.2325	8.5391	8.608	8.3353	8.599	8.3506	8.7375	8.3629	8.3165	8.6218	8.6545	8.4843	8.3998	8.2727	8.4253
	589	17996	ENSMUSG00000026950	Neb	5.2117	4.7824	5.3795	5.3021	4.2587	5.4211	4.795	6.3918	4.9582	4.6186	5.3644	5.1749	5.339	5.279	4.8805	4.7162	4.839	6.3967	5.5111	5.2259	5.061	5.2906	4.9484	5.5789	5.4335	4.1048	5.3007	5.2778	5.4418	5.0523	5.4631	6.5095	6.3716	6.4961	6.352	5.9081	6.2425	5.6399	6.0922	6.3754	6.0849	5.5577	6.044	6.2569	5.9941
	590	216227	ENSMUSG00000019935	Slc17a8	5.2704	6.3449	5.6911	6.8429	5.6991	5.4884	5.4894	6.3477	5.2425	5.9245	5.9019	5.7494	6.056	5.823	6.1591	6.0287	5.0914	4.7264	4.9296	4.8009	6.164	4.1543	4.7223	5.3267	6.2321	5.1727	5.1884	5.7471	5.373	4.6941	4.3544	6.7309	6.4808	6.7591	6.3926	6.6528	6.3912	6.6423	6.7995	6.75	6.3207	6.7877	6.8286	6.8499	6.3777
	591	71699	ENSMUSG00000030089	Slc41a3	8.2398	8.1498	7.9983	7.2732	8.1946	7.5547	7.7846	7.7501	7.7803	8.0728	7.8053	7.8585	7.7398	7.5585	8.0285	7.8778	4.3515	5.9112	5.8941	6.7042	6.4005	6.332	6.0272	6.8265	5.9224	7.1079	6.4122	6.3843	6.4087	5.9865	5.429	7.0732	6.2899	5.4634	5.848	6.1	6.1695	5.863	5.6831	5.2845	5.8639	6.0923	5.8668	6.1242	5.7951
	592	69675	ENSMUSG00000020674	Pxdn	9.6857	9.8873	9.3654	10.0161	9.4627	10.0147	9.5856	9.957	9.6554	9.6369	9.187	9.5951	9.6462	9.5019	9.5258	9.4377	11.0619	10.9442	10.7149	10.3438	10.4435	10.7553	10.5116	10.9444	10.5826	10.2288	10.561	10.7813	10.514	10.8724	10.8003	10.4442	10.9059	10.9994	11.0286	10.8136	10.8333	10.956	10.9181	10.8206	10.6218	10.8258	10.4948	10.9763	10.9386
	593	239157	ENSMUSG00000046204	Pnma2	10.7687	10.8258	10.9433	11.0628	10.8768	10.7217	10.756	10.9036	10.792	10.7895	10.889	10.9215	11.0174	10.9407	10.9378	10.9516	10.6091	10.7971	10.8081	10.6284	10.5966	10.5747	10.7454	10.6244	10.5353	10.6783	10.9415	10.5652	10.5793	10.6732	10.5212	10.1771	10.3062	10.2898	10.4639	10.383	10.3142	10.2245	10.2823	10.4111	10.3978	10.3708	10.1276	10.4365	10.2056
	594	320208	ENSMUSG00000061702	Tmem91	9.4665	9.3173	9.2533	8.7831	9.3584	8.9858	9.2556	9.0059	8.9111	9.0349	8.9966	8.9245	8.9743	9.0542	8.8405	9.1606	8.3094	8.2863	8.2836	8.6102	8.8214	8.6369	8.6534	8.3288	9.0294	8.8112	8.129	8.2747	8.6019	8.7835	8.744	5.928	6.3371	6.5588	6.7562	6.4387	7.0168	6.565	6.2993	6.7148	6.9179	6.7987	5.9132	6.5058	6.5714
	595	100039795	ENSMUSG00000040612	Ildr2	11.5757	11.407	11.4116	11.4997	11.3236	11.5004	11.4437	11.2169	11.4095	11.5147	11.4847	11.585	11.481	11.4772	11.7437	11.4241	12.3505	12.4227	12.2643	12.3312	12.2781	12.1076	12.3771	12.2642	11.9896	12.0276	12.2652	12.0201	12.1063	12.0422	12.2142	11.214	11.5019	11.7618	11.4851	11.5432	11.4993	11.622	11.4196	11.5866	11.4427	11.358	11.5686	11.6941	11.3346
	596	76469	ENSMUSG00000047419	Cmya5	4.1569	3.0841	4.8623	4.0168	5.0454	5.1156	4.1044	5.8548	5.2744	5.0165	4.4981	3.9302	4.0898	4.6718	4.5294	4.4665	6.5796	6.4507	6.1965	6.2408	5.817	5.948	6.6157	6.5344	6.6419	7.0474	7.3257	6.2014	6.6164	5.7831	6.5306	7.3884	7.0896	7.1128	6.8171	6.7844	6.9311	7.0914	7.1382	7.2571	6.8289	6.8205	6.9448	7.1666	6.6805
	597	12550	ENSMUSG00000000303	Cdh1	2	3.4223	3.8944	2	4.5963	5.2764	4.2111	2	3.0413	4.488	3.7332	3.9302	3.3942	6.0974	3.6904	3.4548	5.8416	6.1582	5.2965	6.7261	5.2665	6.6531	5.4203	4.8671	5.1086	6.5485	4.6241	5.6433	6.6014	4.1332	4.4252	4.3846	3.9747	4.8111	3.8949	4.0248	4.7633	5.2232	4.7636	4.628	5.0931	3.8219	4.8947	5.5897	3.9261
	598	71912	ENSMUSG00000020216	Jsrp1	3.4488	3.926	3.3006	3.6852	4.5963	3.8301	3.2142	3.5331	4.2008	4.293	3.7332	3.1406	3.7136	4.1159	3.9501	4.1642	6.3569	6.625	6.4464	7.0017	6.5258	6.7738	5.814	6.9208	7.0893	6.2055	7.352	6.2957	6.8494	6.9645	6.9581	4.9385	5.0577	5.1332	5.1948	4.9646	4.8406	5.4465	4.9715	4.8386	5.9224	5.4779	5.6646	5.3895	5.3163
	599	58188	ENSMUSG00000039257	Vstm2b	8.9019	8.927	8.672	8.7125	9.064	8.773	8.4008	8.3909	8.5334	8.5033	8.4906	8.4813	8.5767	8.5799	8.741	8.8954	9.8376	9.8762	9.9928	10.0358	9.7351	9.4956	9.7698	9.3851	10.1509	9.7186	10.0141	9.9505	9.8905	10.1613	9.8364	9.3526	9.5223	9.4243	9.6857	9.2662	9.5001	9.3701	9.2636	9.4743	9.7639	9.5134	9.0689	9.3121	9.4588
	600	14812	ENSMUSG00000030209	Grin2b	8.934	8.6335	8.9798	9.0294	8.6492	8.9081	8.7137	9.2785	8.7158	8.9853	8.5091	9.1162	8.9479	8.6534	8.715	8.4198	10.6192	10.8916	10.747	10.6094	10.4422	10.4929	10.5722	10.3544	10.4192	10.4896	10.8348	10.4774	10.5239	10.6283	10.7031	10.8353	10.7656	10.8278	10.9928	10.8747	11.0025	10.7782	10.834	10.7388	10.5177	10.368	10.7006	10.6259	10.7595
	601	21941	ENSMUSG00000028602	Tnfrsf8	5.9282	6.5993	6.3827	6.0454	6.5676	6.7855	6.7935	6.069	6.524	6.4659	6.5289	6.4779	6.6308	6.4551	6.0799	6.6454	4.6941	3.9294	4.805	5.9378	5.6435	4.7994	4.454	5.3656	5.6985	5.6228	5.9437	5.026	4.8728	5.6397	5.845	3.5849	3.3018	3.5879	3.8949	4.0248	4.3529	2	3.8608	3.9689	3.3258	3.8219	3.6533	4.5058	3.9261
	602	16939	ENSMUSG00000043165	Lor	8.8135	8.9002	8.4691	8.0823	9.1305	8.4493	8.6103	8.4752	8.5367	8.6783	8.5045	8.4352	8.448	8.5966	8.4468	8.0844	7.2711	7.0313	7.612	7.619	7.2497	7.6693	7.3155	7.1494	8.3635	8.2743	7.9076	7.6192	7.7784	7.7095	7.8407	7.9772	7.6204	7.4719	7.9628	7.4931	7.8001	7.9777	7.6727	7.866	8.1479	7.7947	7.8091	7.6252	7.7752
	603	98303	ENSMUSG00000044816	D630023F18Rik	7.2147	6.7571	6.4532	6.6009	6.3836	6.4898	6.2343	6.2394	6.4561	6.6298	6.4733	6.9027	6.7922	6.9719	7.1572	6.2821	7.0357	6.1254	6.7123	7.233	6.9699	7.4172	6.8762	6.8403	6.3652	7.0057	7.3389	6.6572	6.3017	7.1131	7.0837	6.1609	6.6494	6.97	6.885	6.5822	6.8018	6.9158	5.9764	6.8012	6.9743	6.8205	6.164	6.9429	6.4657
	604	100040529			6.1936	5.1891	5.2899	4.2019	5.0995	5.4211	5.2096	5.329	5.6354	5.7261	5.7544	6.1912	5.5938	5.6844	5.907	5.9976	5.493	5.8722	5.429	5.3437	5.9119	5.7265	6.123	6.5846	5.4812	4.515	5.9437	5.9921	5.6007	5.8628	5.7098	6.1246	6.621	7.0811	6.4578	6.2891	6.4166	6.9886	6.2993	6.6788	6.1598	6.0377	5.7942	7.2689	6.7013
	605	69248			5.1506	5.1441	3.8109	4.1123	6.095	6.1593	4.573	4.9115	4.7471	4.293	4.4219	4.8924	4.8456	5.1645	5.3987	4.0475	5.6584	5.565	5.9831	5.8208	5.0047	6.332	5.9938	5.8493	5.3842	6.0499	4.5351	4.9699	5.7438	5.2627	5.7098	5.8634	4.4747	4.3254	5.1323	4.284	4.5951	3.4978	5.1099	4.0836	4.2979	4.9562	5.3972	4.6228	4.4043
	606	328399			4.9499	5.795	5.7143	6.31	5.8328	5.8876	5.9562	5.0277	5.7305	5.4501	5.1916	4.8122	5.706	5.4599	5.0001	5.6428	5.4485	3.14	4.5952	3.3739	2.3998	5.0385	3.084	2.8649	3.4934	2.3055	4.1111	5.026	4.3357	4.751	3.8364	5.5442	4.8454	5.0483	3.8175	4.6941	4.8406	5.7833	4.7065	4.5504	4.2066	5.3641	4.7488	4.9927	5.0498
	607	22774	ENSMUSG00000036972	Zic4	7.1061	6.4595	7.3102	7.1092	7.4035	6.3522	6.705	6.2868	6.8651	6.2677	6.5469	7.4584	6.1907	7.3384	6.8422	6.2295	5.0914	6.921	5.2494	6.3291	5.4034	5.4231	5.9938	6.601	5.4812	6.2949	3.8409	5.5314	6.1455	5.339	5.0801	6.6942	5.4288	5.9348	5.5933	5.9709	5.7562	7.0352	5.0652	4.5504	5.8337	5.6577	7.1428	5.9671	5.4206
	608	15566	ENSMUSG00000024798	Htr7	9.1249	9.2762	9.0543	9.0686	9.2339	9.1711	9.1389	9.1604	9.1054	9.2801	9.3831	9.3579	9.2705	9.1439	9.4982	9.3449	7.8606	8.0358	8.2057	8.4154	8.3984	8.3175	8.3772	7.6279	8.1878	8.7076	7.9076	8.1666	8.2649	8.0643	8.4324	7.0827	7.5317	7.9351	7.7133	7.6121	7.7052	7.3621	7.4476	7.874	7.5109	7.4901	7.8514	7.3433	7.4937
	609	319463			5.2414	5.3162	3.8109	6.093	4.5963	4.6115	5.402	5.6033	4.7471	5.0165	4.8862	4.5407	4.1962	5.04	4.8805	4.5546	8.9985	8.5623	8.3239	8.2593	8.1355	8.3841	8.5709	8.5806	8.5029	7.9723	8.2318	8.3034	7.9884	8.506	8.2149	8.3278	8.3873	8.1592	8.5127	8.0384	8.3748	8.3258	8.1713	8.4073	8.6458	8.3337	8.041	8.4475	8.3775
	610	16426	ENSMUSG00000006522	Itih3	12.5836	12.7894	12.8991	12.6499	12.8392	12.7051	12.9164	12.618	12.6451	12.8558	12.7929	12.6439	12.7178	12.5942	12.5465	12.6112	9.2782	9.1885	9.8002	9.1073	9.526	9.8711	9.2777	9.267	9.7003	10.0996	9.072	9.7485	9.3435	9.6721	10.145	9.0211	8.7544	8.7117	8.6859	8.7374	8.6109	8.9722	8.5892	8.7445	8.8556	8.7019	9.0431	8.9499	8.6724
	611	237353	ENSMUSG00000037990	Sh3rf3	7.0403	7.5348	7.4409	7.038	7.9293	7.5068	7.6201	7.6629	7.5125	7.7505	7.6883	7.5845	7.4376	7.4527	7.644	7.2042	9.7044	9.3534	9.3791	9.5517	9.3223	9.2796	9.4039	9.5501	9.4803	9.5743	9.5263	9.8197	9.2531	9.5984	9.2152	9.0696	9.061	9.2187	9.2265	9.1706	9.4284	9.0678	9.0192	9.1681	8.9605	9.0786	8.7458	9.1786	9.3931
	612	57890	ENSMUSG00000043088	Il17re	2	2	2.2739	2	2.3956	3.016	2	2	2.8848	3.4714	2.368	3.382	2.4067	3.603	2.7105	2	2	3.14	4.518	4.0646	3.1874	3.935	3.084	2	3.0631	2.5574	3.9824	3.3524	4.0129	2	3.6121	4.0395	2.7236	3.5879	3.1145	3.822	4.8406	3.951	3.0376	4.2887	3.3258	3.1812	4.4671	2.8797	3.2059
	613	231760	ENSMUSG00000029420	Rimbp2	10.2915	10.2961	10.2465	10.2507	10.2768	10.3604	10.2864	10.1796	10.2011	10.3557	10.1065	10.2392	10.2381	9.9964	10.066	9.9393	10.9763	11.068	10.8639	10.812	10.9289	10.6191	10.9399	10.7563	10.8836	10.6006	11.2113	10.932	11.0255	10.8571	10.8646	10.7462	10.8657	11.0261	10.8819	10.96	10.8889	10.7995	11.1158	10.9424	10.7394	10.9314	10.885	10.6554	11.0857
	614	17181	ENSMUSG00000022324	Matn2	7.6331	8.0618	7.8176	8.2855	8.3477	8.1399	8.1151	7.7725	8.0297	8.0689	7.9066	7.7764	7.9595	8.2935	7.8727	7.9928	9.7578	9.2695	9.8776	9.5639	9.521	9.1325	9.5774	9.2148	9.2959	9.176	9.8668	9.3447	9.6948	9.4939	9.4218	10.3403	10.4997	10.2932	10.4891	10.5684	10.4984	10.1122	10.5417	10.3608	10.4768	10.5954	10.3547	10.5134	10.4299
	615	50795	ENSMUSG00000040666	Sh3bgr	4.1569	5.6416	6.06	5.6592	5.6991	6.0298	5.7593	6.069	5.4241	5.7067	5.3644	5.5659	5.5138	5.531	5.3987	5.9658	2	3.9294	3.3651	3.1334	5.2665	3.935	3.6959	5.4034	3.9653	4.515	4.9337	4.1432	3.9195	4.1332	3.9367	5.4299	4.5963	4.5886	4.4507	4.5699	4.8777	4.9097	5.4248	4.2887	5.0931	5.1054	5.0271	4.7048	4.802
	616	195733	ENSMUSG00000020656	Grhl1	7.9345	8.0678	8.288	8.1172	7.9588	8.3168	7.9859	7.8054	7.7121	7.9416	8.1085	8.0716	7.9894	8.169	7.9416	8.0162	8.9354	8.6742	9.4248	8.9303	8.5037	9.3423	8.5538	8.8745	8.6768	8.9248	9.3286	8.7024	8.7415	8.9869	9.19	9.1073	9.2301	9.2187	9.2284	9.1258	9.1611	9.0928	8.9624	8.9284	9.259	9.3622	8.7838	9.1435	9.2087
	617	18399	ENSMUSG00000024650	Slc22a6	3.7253	4.3785	3.9733	3.9145	3.6818	6.1593	4.9261	4.7403	4.5526	4.0051	3.9657	3.9302	4.2952	7.0706	3.3735	3.9206	7.6991	8.8094	7.5838	8.9161	7.2004	8.8831	7.7248	8.7369	8.195	8.4865	6.3085	8.2514	8.9654	7.4845	7.6691	5.3692	5.5135	6.5434	5.9238	6.2185	5.4946	6.8651	6.356	5.8026	6.0849	5.3036	5.1867	6.9597	5.5867
	618	11682	ENSMUSG00000055471	Alk	9.0516	8.917	8.7385	8.7389	8.9136	8.9019	8.7451	8.6874	8.8515	8.872	8.8768	8.9149	8.8897	8.778	8.7791	8.2846	8.088	8.018	7.928	7.8752	7.7973	8.2946	8.1759	6.8944	8.4196	7.9504	8.4725	7.885	8.2166	7.6206	8.2298	6.79	6.8582	6.9111	6.6926	7.3588	7.3695	7.3062	7.1382	6.9746	7.2503	7.1212	7.042	7.339	7.1513
	619	104103			5.381	4.2987	4.686	4.6468	3.9408	3.016	4.1044	4.785	4.4996	5.0478	4.0692	4.0747	4.3879	4.4935	5.1105	3.7814	2	3.7688	3.5316	3.5799	3.3767	4.3445	2	3.6735	3.0631	2.5574	3.8409	2.9501	4.4062	2.334	3.0204	4.2563	4.0333	4.0908	2.979	3.927	3.7773	3.8503	4.4528	3.9689	4.2066	3.8219	3.6533	4.5655	3.6961
	620	380977			5.6695	4.4542	4.0482	2.636	2.3956	4.3474	4.2111	3.0372	3.9864	4.7385	3.456	3.1406	3.7136	4.5402	3.8261	3.2587	6.86	6.3118	6.0395	6.6366	5.7839	5.977	6.2416	5.5112	6.874	6.0292	6.3869	6.9314	6.5242	6.9402	6.2281	6.452	5.9981	6.4799	6.483	5.9709	6.4039	6.2661	6.1994	6.4197	6.2766	6.2286	6.3098	6.1341	6.242
	621	19415	ENSMUSG00000029602	Rasal1	9.4728	9.803	9.267	9.5544	9.7495	9.7731	9.4479	9.2104	9.1534	9.5358	9.3293	9.2516	9.3155	9.2193	9.2311	9.2123	11.7972	11.2019	11.5728	11.4548	11.187	11.5312	11.1094	11.5273	11.3649	11.3001	11.5626	11.3991	11.4434	11.6388	11.5091	10.7692	10.7683	10.659	11.0818	10.8272	11.0897	10.7808	10.8046	10.966	11.1743	10.9432	10.7534	11.1048	10.8626
	622	381113	ENSMUSG00000033966	Cdkl4	7.6662	7.5862	8.0719	7.3339	7.7632	7.5068	7.9933	7.945	7.8976	7.7071	7.6217	7.9828	8.0545	7.8315	7.7069	8.0317	9.01	8.9842	9.2976	9.2155	9.4224	9.2262	9.288	8.9144	9.0883	8.7991	9.7579	8.929	9.1566	9.1884	9.2546	8.3903	8.5032	8.476	8.3877	8.7695	8.6301	8.7872	8.3953	8.6912	8.8593	8.4602	8.4281	8.5285	8.0919
	623	237213	ENSMUSG00000018589	Glra2	8.8691	9.4081	9.5776	9.7911	9.2399	9.4325	9.1854	9.479	9.5648	9.5331	9.4942	9.9423	9.6901	9.6999	9.9352	9.7138	7.5279	8.3084	8.8972	8.7013	9.0611	9.1894	8.7959	8.5599	8.9038	8.9051	9.0196	8.7406	8.56	8.5903	8.935	6.9541	7.3363	7.353	7.1604	7.3063	7.4332	7.5423	6.9788	7.0751	7.2617	7.0494	6.9779	7.1953	6.9128
	624	545156	ENSMUSG00000061751	Kalrn	10.7109	10.5767	10.7502	11.0477	10.6565	10.8535	10.7801	10.985	10.7775	10.7609	10.6406	10.7342	10.8298	10.7214	10.7891	10.5264	13.0608	13.1737	12.988	12.9549	12.9293	12.6449	13.0139	13.0431	12.714	12.7373	13.0736	12.8942	13.1759	12.9792	12.873	13.6233	13.6562	13.5808	13.5575	13.667	13.5959	13.4792	13.8472	13.7213	13.6924	13.7345	13.6715	13.5903	13.8001
	625	14367	ENSMUSG00000045005	Fzd5	9.1486	9.1453	8.7498	9.2343	8.7792	8.9973	9.0838	8.7108	8.8356	8.9044	8.7345	8.4485	8.6993	8.8376	8.5187	8.291	4.7683	5.9862	5.8316	5.7372	5.7839	6.4402	5.5175	5.9293	6.1161	5.7292	5.5021	6.0742	5.4418	5.1822	5.0355	4.9385	5.3154	4.5886	5.4209	5.478	5.5417	5.0525	5.4248	4.9025	5.2837	3.9056	6.1251	5.2868	5.0498
	626	239405	ENSMUSG00000051920	Rspo2	6.9354	5.5059	5.7371	4.1123	5.4302	6.0298	5.4464	6.6433	5.5598	5.7261	5.9297	5.6605	6.1383	5.9837	6.1332	5.2261	7.451	8.1462	7.5647	7.6422	7.7467	7.5487	7.1585	6.5846	7.7746	6.9518	8.3009	7.3046	8.0937	7.3342	7.3524	8.3118	8.7588	8.7791	8.755	8.5322	8.546	8.8472	8.4133	8.6359	8.6327	8.554	8.3834	8.9569	8.08
	627	20698	ENSMUSG00000061878	Sphk1	3.8068	3.5656	3.8944	3.8044	3.8171	3.8301	4.573	2.706	3.1825	4.0051	3.2945	3.9302	3.975	5.6635	3.1845	4.2721	7.0946	7.0489	7.1179	7.5224	6.2633	7.6603	7.1433	6.8541	7.4898	7.3606	5.7983	6.7266	7.4261	6.6421	7.2391	5.205	4.4747	5.0483	5.0331	4.9397	5.2333	6.2063	4.228	5.133	5.1432	4.3261	4.528	5.687	4.6812
	628	381677	ENSMUSG00000037428	Vgf	12.9117	12.7834	12.5412	12.5353	12.9989	12.5714	12.6636	12.3051	12.6184	12.5887	12.6627	12.4872	12.4747	12.5336	12.4293	12.5793	12.2134	12.3764	12.3424	12.6051	12.3512	12.1291	12.3505	12.1176	13.1875	12.6244	12.8804	12.5144	12.5744	12.5639	12.5124	11.5246	11.6679	11.5709	11.6315	11.4989	11.8094	11.5636	11.5408	11.7518	11.8005	11.7659	11.4856	11.5284	11.6136
	629	243755	ENSMUSG00000029843	Slc13a4	2.2536	5.0976	5.2587	4.1123	5.3432	6.8887	5.6497	4.8705	5.0715	5.0165	5.047	4.0747	5.2919	7.7838	5.1627	4.9936	7.68	9.1645	8.022	9.738	8.0684	9.4315	8.2343	9.3395	8.3117	8.8589	6.6427	8.2573	8.9741	7.4157	8.6061	6.2976	6.6305	7.4881	6.6374	7.9352	8.7699	7.5342	6.8919	6.5451	6.9179	5.9809	8.8891	7.9587	6.8013
	630	241528	ENSMUSG00000075224	Lrrc55	8.6099	8.4562	8.7013	8.3797	8.2673	8.6314	8.7888	8.9797	8.7474	8.6455	8.8553	8.7843	8.9171	8.8069	8.7749	9.0663	7.3579	7.8576	7.2432	7.6422	7.9467	7.3411	7.7248	7.3369	8.0122	8.1648	7.8533	7.8309	7.5559	7.4929	7.2489	7.4775	7.6487	7.6625	6.9408	7.7146	7.0659	7.4071	7.6426	7.4829	7.5013	7.6011	7.9269	7.3088	7.2536
	631	268663	ENSMUSG00000034918	Cdhr2	7.1921	6.9524	7.4199	6.8568	6.4476	6.4226	7.045	6.9289	6.6751	6.9442	6.4543	6.9409	6.7048	6.7906	7.0779	6.3077	4.9063	5.1741	5.7993	5.0977	4.9461	4.6631	4.1242	2	5.8515	4.7354	5.9087	4.4194	4.9218	5.3757	5.2456	4.0395	3.7134	4.3254	3.2385	3.5202	3.4227	2.6052	3.8608	4.2887	3.3258	3.9848	3.5396	4.3448	3.6105
	632	241118	ENSMUSG00000033007	Asic4	8.081	7.8679	7.5607	6.7861	8.3365	7.7591	7.7408	7.4151	7.4991	7.2898	7.6554	7.7115	7.6302	7.5007	7.5194	7.4424	9.1863	8.506	8.6837	8.3745	8.6018	8.5234	8.3641	8.5599	9.1779	9.0327	8.571	8.4179	8.7719	8.5746	8.402	7.2007	7.0044	7.5665	7.4504	7.2262	7.0739	7.0467	7.3854	7.4933	7.1801	7.4135	6.4736	7.4302	7.1283
	633	93842	ENSMUSG00000037995	Igsf9	7.8016	8.2219	7.5735	7.9783	7.8604	7.9382	7.8188	8.2819	7.8874	7.9416	7.7283	7.5965	7.7916	7.581	7.7839	7.5428	7.641	7.1004	7.3914	7.3642	7.0555	6.5409	6.9992	7.1715	6.9437	6.9844	7.2578	7.2818	6.6747	7.5177	7.1891	6.0492	5.843	6.194	5.8674	6.0887	5.8149	5.5465	6.0003	5.8026	5.7714	6.3382	5.9581	5.7781	5.8707
	634	13004	ENSMUSG00000002341	Ncan	10.2719	10.5118	10.3011	10.3073	10.6689	10.3355	10.593	10.1414	10.2511	10.3581	10.2289	10.2277	10.2287	10.2457	10.1049	10.1678	12.2046	12.0971	12.0766	12.2571	12.0204	11.6931	12.2572	12.0857	12.0546	11.9819	12.0011	12.0601	12.0876	12.0155	11.8271	11.6295	11.6522	11.6909	11.6518	11.6349	11.6658	11.5078	11.7475	11.6932	11.4452	11.4833	11.4803	11.6197	11.6566
	635	218518	ENSMUSG00000021636	Marveld2	5.3541	4.5946	4.9816	2.636	4.8061	5.0279	5.309	4.9115	4.2657	4.7385	4.8862	5.2978	4.2952	4.5402	5.0564	4.2721	4.0277	3.3814	3.8162	3.9204	3.694	4.6631	5.6943	6.1002	3.4934	3.2719	3.8409	5.026	4.5377	4.2165	4.678	5.6244	4.5569	4.9107	4.9985	4.5036	4.8406	4.1334	3.9617	4.2887	3.8922	4.6512	4.528	3.7136	4.2988
	636	270097	ENSMUSG00000046844	Vat1l	12.5444	12.5664	12.6469	12.6677	12.6793	12.5926	12.5402	12.6448	12.5808	12.6525	12.5717	12.5604	12.5941	12.578	12.4988	12.5774	10.6902	10.7695	11.1084	11.0418	11.1207	10.8987	10.9937	10.5776	11.0697	11.1228	11.2676	11.0517	10.7712	10.6787	10.7945	8.9188	8.7147	8.375	8.411	8.7174	9.9361	8.6061	8.3908	8.2382	8.6151	8.3185	9.4396	8.9804	8.4655
	637	207259	ENSMUSG00000044646	Zbtb7c	8.9112	8.6212	8.8235	8.5557	8.8281	8.5784	8.5707	8.7423	8.3584	8.5089	8.2962	8.3383	8.5618	8.4206	8.1369	8.1138	7.9351	7.2448	8.1298	8.0238	7.7207	8.283	7.3944	7.5373	8.2163	8.1214	7.768	7.823	7.8434	7.6433	8.1006	5.5442	5.776	6.1539	5.7885	5.3704	5.7956	5.3759	5.389	5.2845	5.6028	5.3641	5.492	6.0214	5.7951
	638	93688			9.2376	9.427	9.0384	9.3466	9.2519	8.9623	9.2081	9.196	9.4136	9.3476	9.4778	9.4336	9.529	9.5092	9.5108	9.5248	5.1481	6.2216	5.954	6.3574	6.9699	6.4609	6.8762	5.7934	7.4781	7.1275	6.3613	6.5465	6.4593	4.9095	6.9581	5.1338	5.5135	5.3259	5.1948	5.1277	5.7362	5.2629	5.2759	4.3813	6.006	4.9562	5.2604	5.3561	4.7628
	639	64337	ENSMUSG00000025739	Gng13	7.3769	7.2676	7.1748	6.31	7.7882	7.097	7.3318	6.6064	7.233	7.2767	7.0929	7.0499	6.6866	7.1175	7.0914	6.6454	8.7415	8.634	8.5639	8.9161	8.8336	8.8123	8.4953	9.2746	8.6247	8.9635	8.1813	8.7322	8.7819	8.6883	8.6622	8.8258	8.04	7.7922	8.2023	7.8476	8.2564	8.2974	7.8868	8.2195	8.2138	8.1004	7.6742	7.7938	7.8611
	640	213948	ENSMUSG00000038295	Atg9b	8.8306	8.6617	8.5421	8.1287	8.9361	8.6239	8.355	8.7564	8.553	8.6506	8.5633	8.5447	8.4852	8.4514	8.4363	8.5108	7.2191	6.8221	7.5454	7.1219	6.9845	7.7044	7.1125	6.649	7.2494	7.5395	7.2989	7.0307	7.1041	7.2868	7.0837	6.1963	5.938	6.2521	6.9317	6.1	6.5142	6.565	6.3373	6.3977	6.7176	6.2123	6.023	6.053	6.1388
	641	56739	ENSMUSG00000002324	Rec8	8.5755	8.5411	8.0674	8.4771	8.1311	8.2013	8.1624	8.2623	8.0711	7.788	8.1504	7.6436	7.952	7.8958	8.4416	8.1566	5.8756	6.2216	7.3362	6.046	5.8809	7.687	6.3246	3.6735	7.2075	5.5665	6.8961	6.1519	7.1252	7.0119	7.4404	6.4074	5.3388	4.8618	4.5968	5.1277	5.7956	5.2232	4.5852	5.6621	4.9315	4.8755	5.3972	4.7311	5.3694
	642	230099	ENSMUSG00000028463	Car9	4.4887	5.1891	4.9429	5.2187	4.7395	4.4855	5.3563	4.9512	5.4241	5.6052	4.8283	4.8924	5.429	4.3436	4.5294	4.9291	3.6096	3.7688	4.4363	3.1334	5.2178	2.957	2	2	2	5.4468	2.453	2.9501	3.7123	3.358	5.0801	4.3846	3.85	3.3246	2.979	4.434	4.2992	3.4978	3.5072	3.708	5.0412	3.9848	4.4036	4.4435	4.1849
	643	224829	ENSMUSG00000064043	Trerf1	9.221	8.9951	9.0035	9.5394	9.0296	9.166	8.8926	8.9893	8.8409	8.8829	8.7502	8.8309	8.9287	8.751	8.8761	8.5701	9.5963	9.723	9.3927	9.2385	9.1186	9.3781	9.2983	9.2899	9.7203	9.4611	9.656	9.2712	9.6464	9.7067	9.344	9.0862	9.2488	9.0678	9.1077	9.0979	9.2838	8.8731	9.0766	8.9811	9.1377	9.0304	8.9681	8.8957	9.1454
	644	269389	ENSMUSG00000074607	Tox2	10.6842	10.6827	10.6328	10.5301	10.9696	10.7562	10.5991	10.6124	10.5007	10.6821	10.4416	10.3971	10.4383	10.483	10.2966	10.503	9.0403	8.7938	9.3927	9.2155	8.9387	9.2531	9.0074	9.0841	9.5151	9.3487	9.4339	9.3447	9.1945	9.288	8.9768	8.2915	8.4504	8.4348	8.4208	8.4684	8.8585	8.3117	8.4133	8.6592	8.6151	8.371	8.3116	8.6507	8.3247
	645	320712	ENSMUSG00000035258	Abi3bp	3.4488	5.1441	4.7768	5.4188	5.8953	5.9366	5.6497	5.6999	5.3661	5.5626	5.9019	5.614	5.8757	5.4354	4.8805	5.0553	6.0644	7.2751	6.3605	6.3003	6.4852	4.431	6.9992	6.8265	6.9437	6.9407	7.2438	6.9017	6.8745	6.5648	6.7805	5.9068	4.6719	4.6475	4.2881	5.06	4.9492	4.7512	3.9617	4.628	4.9315	4.4428	5.1867	5.1953	4.5494
	646	14585	ENSMUSG00000025089	Gfra1	9.9086	9.821	10.0166	9.7983	10.1237	9.839	9.6271	9.7638	9.9051	9.5766	9.784	9.8772	9.835	9.7896	9.7147	9.6577	9.1521	9.6031	9.549	9.3162	9.4197	9.259	9.4322	9.1906	9.4204	9.7474	9.2114	9.5307	9.3943	9.1466	9.518	9.76	9.9341	9.9874	9.9989	9.8876	9.9547	9.6256	9.9148	9.9454	9.6451	9.7384	9.5918	9.9767	9.8031
	647	11854	ENSMUSG00000041845	Rhod	2	3.696	5.0193	2	4.1603	2.5956	4.3104	3.9014	3.9073	3.4714	3.6013	3.9302	3.3942	3.8454	3.3735	2.4311	4.3515	3.9294	3.6809	3.1334	2	4.7329	3.318	5.5112	4.2114	4.2549	4.7872	4.1432	2.8147	4.3698	3.6121	4.2563	3.4807	3.3246	3.6491	4.1602	4.8024	3.3581	3.8608	4.1898	3.4895	4.1311	4.2673	3.9999	3.9261
	648	12160	ENSMUSG00000032179	Bmp5	4.5373	3.2631	4.686	4.935	4.2587	4.4855	3.2142	4.1946	3.5383	3.8	4.1658	3.7695	3.8502	4.0529	4.6068	4.6377	4.839	5.9112	4.5952	5.5538	5.5678	5.2436	3.995	4.6948	5.5274	4.6834	3.075	3.9245	4.7695	4.2952	3.3464	4.3846	4.7083	4.5272	4.4507	3.927	4.5031	5.0064	4.3817	3.708	4.1092	3.8219	4.9843	4.8073	3.6961
	649	20689	ENSMUSG00000024565	Sall3	8.6297	8.2165	8.5805	8.27	8.3195	8.4151	8.483	8.6118	8.3658	8.4398	8.3486	8.302	8.5266	8.3238	8.3932	8.4603	8.2587	7.4574	7.2905	7.4972	7.712	7.4278	7.87	7.2669	7.6959	8.3261	7.5468	7.6991	7.5942	7.8978	7.5788	6.9644	7.0896	6.9929	7.3441	6.9241	7.1289	6.7991	6.8398	7.3052	7.1313	7.0026	7.0315	7.339	7.2395
	650	15114	ENSMUSG00000006930	Hap1	14.5003	14.5378	14.4145	14.3528	14.5836	14.4247	14.3515	14.243	14.0493	14.3349	14.1425	14.1523	14.1186	14.1643	14.0207	14.0892	13.4157	12.929	13.6947	13.4072	13.3767	13.7531	13.2498	13.0052	13.6226	13.5622	13.6187	13.5305	13.1427	13.599	13.6901	11.3489	11.4631	11.6437	11.7759	11.448	11.9311	11.7193	11.3768	11.6784	11.5287	11.5821	11.0197	11.8733	11.6184
	651	330355	ENSMUSG00000052861	Dnah6	7.5107	8.2646	8.0808	8.0881	7.9878	8.4577	8.6248	8.309	8.4555	8.2679	7.5608	8.063	8.365	8.049	7.5973	7.7898	5.493	6.3967	6.6948	6.4653	7.3547	6.4192	2.4576	7.6981	4.5161	6.9627	5.6787	6.1264	5.7163	5.9865	6.9699	6.4074	6.2534	6.3261	5.8284	7.0745	7.1365	7.6208	6.5789	6.3062	6.988	5.9016	7.334	7.1226	6.6805
	652	20605	ENSMUSG00000035431	Sstr1	9.4696	9.9894	9.7346	9.5265	9.9376	10.1297	9.7091	9.7638	9.6402	9.8088	9.7237	9.7538	9.8473	9.8546	9.7514	9.8419	9.8202	9.5851	10.0794	10.1166	9.6889	9.8692	9.4722	9.3945	9.6876	9.4259	10.1193	9.7977	9.6001	9.8938	9.889	8.7563	9.1196	9.4369	9.4688	8.9281	9.5369	9.4518	9.0681	9.3737	8.995	9.0943	8.5903	9.3337	9.1718
	653	235379	ENSMUSG00000046167	Gldn	6.1474	6.3045	6.784	7.1207	5.5516	6.1174	6.3786	6.2554	6.7788	6.4659	6.2492	6.8025	6.5328	7.0546	6.4172	6.5197	5.7345	5.565	6.4041	5.6484	5.4879	6.2629	5.9938	6.1677	5.5721	6.9184	5.9779	5.8748	4.8728	5.9626	6.5934	5.1338	4.7438	5.5586	5.3123	5.4606	4.8024	5.8104	4.8184	4.3813	4.6141	4.5508	4.8476	5.2868	5.1743
	654	11906	ENSMUSG00000038872	Zfhx3	10.1993	9.9393	9.9228	10.1711	10.2261	10.2091	10.1115	9.9896	10.2248	9.9603	10.1231	10.3285	10.213	10.3566	9.9314	9.9352	8.0287	8.4673	8.6926	8.0672	8.916	8.543	8.3836	7.1605	8.8861	9.0533	8.3076	8.179	8.3253	8.3162	8.6585	6.9541	6.7919	7.0043	6.483	6.9177	6.6705	7.1977	6.5789	6.7673	6.6672	6.574	7.7009	6.7246	6.627
	655	252838	ENSMUSG00000041272	Tox	8.7402	8.4835	8.7129	9.0047	8.5063	8.7797	8.6103	8.1976	8.5788	8.6092	8.5229	8.8561	8.6857	8.7974	8.7495	9.0996	8.1238	7.9066	8.0008	7.8752	8.1023	8.1038	7.7248	7.7794	7.6127	7.9831	7.9936	7.7499	8.0393	7.8723	7.9765	7.5339	7.7394	7.8623	7.5495	7.7109	7.5924	7.3157	7.4563	7.3517	7.8938	7.4833	7.3082	7.493	7.3948
	656	320747	ENSMUSG00000044505	Lingo4	6.1936	6.1077	6.2777	6.5844	6.1473	6.6452	5.7593	6.5164	5.9239	6.3326	5.4046	5.9501	6.084	6.2596	5.8761	5.866	5.4025	4.3257	3.9398	5.029	4.8213	3.6764	5.4697	3.5441	4.2114	4.9265	4.3386	3.3524	4.1006	4.6941	4.2015	4.6114	4.0333	4.3959	3.8175	4.398	4.2434	4.6943	4.9223	3.708	3.8922	3.4277	4.1941	4.2749	4.5947
	657	19419	ENSMUSG00000027347	Rasgrp1	10.0987	10.1345	10.2731	10.5312	10.0118	10.4002	10.2726	10.4014	10.5561	10.6702	10.2428	10.4527	10.5238	10.4047	10.9983	10.298	12.3925	13.0196	12.3497	12.6756	12.6633	11.9448	13.0194	12.4434	12.7283	12.2935	13.2273	12.4351	12.8952	12.5931	12.3093	13.3365	13.5402	13.5152	13.5568	13.6504	13.452	13.3855	13.6907	13.5043	13.4255	13.5857	13.6617	13.454	13.4451
	658	14570	ENSMUSG00000073433	Arhgdig	10.3741	10.0562	10.0614	9.6688	10.3965	9.8959	10.1029	10.1414	10.013	10.1324	10.1171	10.14	9.9014	9.9827	9.9831	10.1538	9.6709	9.5546	9.2566	9.9244	9.526	9.6791	9.6136	9.3321	9.8047	9.9672	9.6587	9.9559	9.8751	9.7855	9.6439	9.4234	9.1331	9.2452	9.3048	9.3033	9.5179	9.2858	9.3639	9.3652	9.621	9.4006	9.1822	9.1726	9.2918
	659	214084	ENSMUSG00000025094	Slc18a2	9.8924	10.0936	9.8225	10.4131	9.5624	10.0429	10.5	10.2199	10.5945	9.9867	10.678	10.0401	10.5289	10.6136	10.2355	10.339	6.308	6.8221	6.9806	6.1787	7.1494	6.7233	6.7215	6.601	6.6207	6.3626	6.8414	6.6212	6.7169	6.2462	6.3961	7.0443	7.2214	7.4306	7.1526	7.3588	6.966	7.6436	7.0027	6.9294	7.0809	7.4558	7.237	6.8378	7.0163
	660	71746	ENSMUSG00000040146	Rgl3	6.7103	6.6323	6.2932	6.31	5.3873	6.3156	6.1564	6.1903	6.3553	6.3452	5.9297	5.7494	6.1907	6.3542	6.1068	6.1469	7.1513	5.9112	6.3605	6.7897	6.5846	6.0608	5.6521	6.4283	6.2868	6.5485	5.5021	5.905	6.2451	6.01	6.2478	6.7548	6.0127	6.0265	5.8864	5.4072	5.8339	6.0334	5.9021	5.8997	6.3423	6.0743	6.6206	6.4514	5.8707
	661	16010	ENSMUSG00000017493	Igfbp4	7.4422	7.4169	7.6535	7.3921	7.8682	8.0757	8.0662	7.0891	7.6587	7.8425	7.4597	7.4318	7.2404	7.7983	7.5973	7.2312	9.5418	9.3709	9.7118	9.7245	9.5606	9.4342	9.3018	9.2359	9.5406	9.4592	9.4674	9.5428	9.7853	9.5809	9.3554	10.6101	10.3863	10.01	10.302	10.4312	10.4819	10.0708	10.568	10.4056	10.4914	10.49	10.3453	10.3527	10.4738
	662	225207	ENSMUSG00000024420	Zfp521	8.7219	9.1338	9.298	9.2967	9.2459	9.27	9.1523	9.0593	8.9901	9.3271	9.0577	9.1245	9.15	9.303	9.0628	9.301	7.7999	7.9066	8.1619	8.1981	8.1679	8.0295	8.0103	8.0417	8.2442	8.7682	7.698	8.1666	7.9238	7.7727	7.9225	8.8648	7.8039	7.6767	7.7079	7.4409	7.6739	7.6132	7.5645	7.7318	7.4525	7.198	8.1222	7.5235	7.7996
	663	241226	ENSMUSG00000026768	Itga8	3.547	4.4542	5.1943	4.2019	4.8697	4.8347	4.6509	4.6464	4.8353	4.6597	4.768	5.3556	5.429	4.3436	5.2131	5.4263	7.3698	6.8424	6.8128	6.8704	7.1751	7.4278	6.5711	6.3138	6.3134	6.1491	6.7455	6.5843	7.2928	6.9402	6.7939	7.9201	8.1131	8.3531	8.1908	7.9001	7.843	8.283	8.273	8.1222	8.1417	8.2758	8.1467	8.1267	8.0273
	664	50782	ENSMUSG00000024186	Rgs11	9.2394	8.795	8.3778	8.5343	8.2907	8.5784	8.5041	8.6118	8.5367	8.5367	8.3227	8.2724	8.48	8.1199	8.5435	8.1707	8.0438	8.0269	7.7536	7.885	7.9392	8.0295	7.0489	8.2271	8.687	7.8713	7.4527	8.1414	7.5325	8.5864	8.4452	8.4792	8.8794	8.5818	8.7049	8.7137	8.4842	8.5349	8.4871	8.6359	8.8668	8.8572	8.9432	8.5153	8.9304
	665	17295	ENSMUSG00000009376	Met	5.3541	5.7049	6.2932	6.7118	5.4302	5.984	6.3556	6.2712	6.1811	5.9245	6.1582	6.0928	5.9383	5.9495	6.5407	6.5197	6.9743	6.625	7.2788	7.0886	6.2145	6.6166	6.7815	6.5172	5.9224	7.1177	4.8623	6.6212	7.7103	6.7989	7.5153	6.2309	6.6494	6.344	6.5799	6.5164	6.5944	6.6119	5.6532	6.1307	6.874	6.2448	5.6646	6.8196	5.7357
	666	55983	ENSMUSG00000035357	Pdzrn3	7.3836	7.0036	6.6701	6.8429	7.28	6.703	6.5306	5.0277	6.7676	6.5337	6.4351	6.5783	6.6308	6.6272	6.1332	6.8334	9.1897	9.7447	9.3488	9.6971	9.1383	8.7839	9.5915	9.5627	9.1815	9.4534	9.5857	9.3253	9.8325	9.4729	9.4088	7.7929	7.8039	7.4961	7.5314	7.6661	7.5297	8.1088	7.4213	7.5036	7.6645	7.2943	7.7968	7.8186	7.5694
	667	12123	ENSMUSG00000046607	Hrk	8.4855	8.3313	8.2087	8.2855	8.0982	8.4151	8.4343	8.3616	8.3658	8.2069	8.2529	8.3525	8.2768	8.3535	8.5386	8.3538	11.8296	11.4347	11.3964	11.404	11.2655	11.2044	11.3094	11.571	11.1803	11.1356	11.3252	11.409	11.1745	11.2111	11.2961	10.2357	10.3275	10.526	10.4391	10.3337	10.3378	10.4216	10.4877	10.5105	10.4472	10.3717	10.4737	10.4149	10.5353
	668	665033			6.5058	6.8299	6.9395	6.6009	7.1579	6.4226	7.156	7.016	6.8546	6.9852	6.0099	6.9219	6.9062	7.0055	6.4172	5.9333	6.3808	5.7485	6.2453	5.0977	6.7649	6.5014	4.5491	4.7546	6.0543	6.6469	5.0017	6.0473	5.1445	5.9135	6.5779	4.8524	4.3421	4.9107	4.7295	4.6641	4.9837	4.9097	4.3817	4.1898	4.9315	3.9056	4.6426	5.1953	3.2059
	669	234290	ENSMUSG00000049946	BC030500	7.9923	7.7898	7.9745	8.123	7.7379	7.9855	7.6956	7.8429	7.6945	7.8602	7.8053	7.8685	7.6396	7.7692	7.5194	7.8864	7.2453	7.0663	7.1438	7.2176	6.9699	7.7387	6.9823	6.5172	7.3166	7.2928	6.9828	6.9166	7.0501	7.3154	7.2093	7.8662	7.7742	7.6042	7.9983	7.7686	8.0153	7.7798	7.7382	8.0951	7.8938	7.733	7.6123	7.8991	7.9378
	670	20776	ENSMUSG00000049555	Tmie	9.3387	9.5889	9.7016	9.5046	9.7088	9.5901	9.651	9.3694	9.3682	9.4953	9.5332	9.4268	9.3705	9.4989	9.3901	9.67	7.9431	7.7216	8.2953	8.0413	7.9908	8.8002	8.2271	7.7866	8.0835	8.4674	8.2941	8.1028	7.9884	7.9534	8.0898	5.7004	5.5935	5.759	5.5933	5.1923	6.0768	6.2855	5.7692	5.7341	5.2837	5.5577	6.4264	5.9999	5.6524
	671	320790	ENSMUSG00000041235	Chd7	8.5009	8.8238	8.7748	8.7277	8.9872	8.7526	8.8966	8.8853	8.8248	8.8186	8.7772	8.4617	8.5215	8.731	8.5086	8.5381	7.8521	8.1462	8.51	8.0326	8.2848	8.4109	8.1907	8.294	8.0989	8.5819	7.8807	8.1286	8.3745	8.2034	8.2591	9.5672	8.6366	8.7857	8.5698	8.5772	8.3486	8.6138	8.9471	8.4876	8.6844	8.7309	8.7586	8.6981	8.9104
	672	380928			7.4799	7.6439	7.8122	7.6684	7.2683	7.8514	7.5507	7.5247	7.3795	7.7265	7.8203	7.5965	7.5522	7.6677	7.9785	7.7623	11.2894	11.5286	11.0959	11.0076	11.0276	10.5783	11.3111	11.5008	11.0241	10.825	11.4643	10.8807	11.1795	11.1791	11.039	10.8822	11.2788	11.1433	10.9452	11.1246	10.8712	10.9538	11.1944	11.0661	11.2289	11.2273	11.0236	11.1322	11.0239
	673	236643	ENSMUSG00000054453	Sytl5	6.4687	6.4223	6.6096	6.6495	7.0658	6.731	6.8274	7.1588	6.7105	6.8048	6.716	6.8634	6.8422	6.4912	6.0524	6.8853	6.9264	6.3407	7.3135	5.9748	7.2129	7.2127	6.8945	7.3563	6.5775	7.3186	6.5549	6.8247	5.9229	6.6421	6.9817	5.8187	5.7413	6.0485	5.8086	5.8952	5.9946	5.6399	5.8765	5.9907	5.0412	4.8755	6.3609	5.9781	5.5412
	674	54376	ENSMUSG00000066189	Cacng3	8.406	8.6005	8.4136	7.8387	8.5458	8.1606	8.0447	8.2623	8.3245	8.2276	8.2801	8.2497	8.1894	8.2201	8.1755	8.6771	10.6267	10.7468	10.5717	10.6613	10.4343	10.2379	10.668	10.4251	10.5382	10.1921	10.8499	10.658	10.6474	10.8068	10.5151	9.6542	9.6715	9.3013	9.5725	9.7396	9.4	9.6889	9.6551	9.6842	9.6624	9.6637	9.383	9.6912	9.652
	675	14160	ENSMUSG00000020140	Lgr5	6.8026	5.9336	6.2621	6.6009	6.0128	6.2396	6.284	6.2394	6.1471	5.7643	6.6999	6.3699	6.4055	6.2456	6.5796	6.2821	5.1481	5.7909	5.0983	5.029	5.061	3.935	5.316	5.9802	6.0855	5.0549	5.5483	4.9699	4.9691	5.8101	5.7379	5.4299	4.7785	4.0033	4.5011	4.6334	4.6817	4.806	4.0561	5.4217	4.5413	3.8219	4.9402	4.7569	4.243
	676	12845	ENSMUSG00000031849	Comp	2	2.8797	2	2	2	3.8301	2	2	3.4292	3.2741	3.1126	3.1406	2.7237	3.6884	2.7105	3.2587	3.2436	3.7688	2.7052	4.0646	2	3.8115	2.8045	5.16	4.7676	4.3908	2	4.1432	4.6583	3.625	3.8364	3.8744	2.7236	3.4622	3.4583	3.5202	3.2062	3.2035	3.7523	2.9793	3.3258	4.3261	2.7784	2.678	4.5026
	677	20460	ENSMUSG00000028718	Stil	3.3435	3.696	2.504	2.8726	3.3659	3.3411	3.2142	4.6941	2.8848	2.9157	3.8541	3.5887	4.0898	3.9179	3.8261	4.2721	3.7629	3.3814	4.3497	4.1957	4.1741	3.1732	3.318	2	2	3.8455	2.453	3.9245	4.1833	2.8332	3.1926	4.3846	3.4807	3.0022	3.4583	2.9517	2	3.7421	3.2117	2.7205	2.929	3.6382	2	2.678	3.3182
	678	53857	ENSMUSG00000030137	Tuba8	7.2295	6.8012	6.9395	7.199	7.3818	6.6452	6.7935	6.0323	6.8009	6.8586	6.8235	6.0584	6.6497	6.5148	6.8422	6.3819	6.2047	7.4705	5.954	7.4972	6.2145	6.5602	6.4031	6.1455	6.7626	5.8985	7.2011	7.0169	7.3021	6.9155	6.9095	7.9095	7.0896	7.5893	7.6972	7.2568	7.7757	7.2774	7.5725	7.5442	6.874	7.6198	7.2	7.462	7.6413
	679	330164			5.381	6.3646	5.9472	6.1838	5.8953	6.1593	5.9252	5.8337	5.9636	5.8904	5.8152	6.5036	6.4055	5.6844	6.2342	5.9976	7.0655	6.4769	6.5664	6.439	6.9699	6.8226	6.7815	6.7256	6.5101	6.6738	6.6639	6.5076	6.4758	6.5164	6.4309	5.4299	5.4717	5.759	5.639	5.7878	5.7362	5.5465	5.6227	5.6985	5.6381	5.5577	5.5809	6.032	5.8144
	680	235041	ENSMUSG00000032194	Kank2	7.9162	8.275	8.2568	8.1344	8.2131	7.9502	8.3197	8.0124	8.1677	8.1683	7.8128	7.7658	7.9968	8.2866	7.919	7.7715	8.3762	8.5313	8.1933	8.7122	8.2428	8.6595	8.5131	8.593	8.1661	8.6847	7.8441	8.3645	8.583	8.0302	7.9999	8.7943	7.9592	7.9468	7.9032	8.0266	8.2458	7.7522	7.7872	7.6222	7.9156	7.7215	7.8809	8.2501	7.929
	681	71733	ENSMUSG00000006342	Susd2	9.9462	9.8684	9.65	9.7911	9.9395	9.8228	9.827	9.1085	9.617	9.7242	9.4445	9.6422	9.4234	9.6275	9.4465	9.6945	7.9025	8.7243	8.3239	8.7286	8.4884	8.1491	8.7214	8.4285	8.8457	8.5313	8.8684	8.6981	8.5128	8.4894	8.4494	5.7489	5.6319	5.4959	6.1458	6.0773	6.1545	6.0561	6.0003	5.9907	6.2988	5.2405	5.8668	5.6735	5.8144
	682	215748	ENSMUSG00000015202	Magi1	7.2295	7.0653	6.9395	7.2098	6.814	7.0081	6.9247	7.357	7.1408	6.9689	7.0805	6.8832	7.0968	6.9374	6.994	6.8853	6.5377	6.8625	6.7801	6.6595	6.6411	6.9004	6.8762	7.5458	6.9093	7.0679	6.6212	7.2349	6.54	6.2462	6.7114	7.7637	6.5526	6.194	6.7247	6.668	7.1743	6.9648	6.5947	6.8506	6.9034	6.8734	7.2551	6.8011	6.6593
	683	108115	ENSMUSG00000038963	Slco4a1	4.9854	6.0841	6.1132	6.6495	5.5123	6.4566	5.7237	5.9164	6.0765	6.0378	6.2492	6.0928	5.6696	6.1129	6.0245	5.4723	5.8416	5.7485	5.3862	5.9378	4.885	6.5792	5.814	5.2868	5.7383	6.3292	4.5351	5.4921	5.7708	5.1822	5.7098	6.0874	5.0002	5.5276	4.9266	5.2542	5.5183	5.5465	5.3146	4.9025	5.0412	5.0695	5.1091	4.7823	5.1442
	684	240444			7.5761	7.2464	7.158	6.6654	7.668	7.1807	7.401	7.5378	7.4855	7.094	7.4112	6.9409	6.9973	7.0785	7.1181	6.9022	8.1793	6.6014	8.097	7.5472	7.332	8.2237	7.1585	7.5116	7.1496	8.1408	7.0961	7.4654	7.4597	7.8851	7.6095	9.1643	9.4742	9.5201	9.7431	9.4304	9.7064	9.1809	9.293	9.4558	9.5898	9.6517	9.2334	9.3497	9.5085
	685	12922	ENSMUSG00000003476	Crhr2	7.0061	6.5311	7.0529	6.681	6.846	6.0743	6.668	6.6188	6.2144	6.4188	6.4543	6.4516	6.7048	6.5494	6.5407	6.7977	6.1502	5.7485	5.5111	5.8998	5.4034	6.3093	5.316	5.9031	5.9899	5.5375	5.6365	6.02	5.5075	5.9383	5.429	4.1876	4.9093	5.0038	4.5011	5.7164	6.7427	4.5086	4.228	5.133	4.8128	5.0695	6.3609	4.1634	4.802
	686	71887	ENSMUSG00000002228	Ppm1j	2.9716	4.66	3.4181	4.935	5.0995	3.3411	3.5754	2.706	3.6397	2.6153	4.0692	3.7695	3.8502	4.2342	4.0642	3.4548	4.3515	4.8915	3.5316	4.7161	4.0682	3.6764	4.2427	5.8493	4.2114	5.0133	4.1111	2.9501	3.9195	4.6941	4.28	3.5849	2.8592	2.3228	2.6623	3.048	3.8538	3.0302	2	2.7205	3.141	2.2765	2.5625	2.7824	2.8047
	687	18205	ENSMUSG00000049107	Ntf3	4.0269	2.8797	3.7223	2	4.1603	3.016	3.7269	3.9805	3.4292	3.8716	3.9657	4.4376	3.975	4.2342	3.5407	3.0319	6.7904	5.565	6.0669	6.3291	5.3592	6.2391	6.0272	6.3722	4.5161	4.515	6.1071	5.6787	5.4418	5.8367	5.7098	6.8798	7.0476	7.0811	7.1991	7.1632	6.7326	6.8258	7.1702	7.0041	7.0418	7.0121	6.6889	6.9316	7.2677
	688	54156	ENSMUSG00000000402	Egfl6	6.7103	6.2631	6.869	6.2483	6.2465	5.7844	6.7762	7.5312	6.7899	6.7199	6.6837	6.7169	6.7404	6.6486	6.8894	6.9022	6.6599	6.2216	6.3824	6.5412	6.8148	6.3979	6.6801	4.8671	5.6155	7.0474	6.1676	6.8405	6.758	6.1647	6.6828	6.2137	5.9533	6.5588	6.0133	6.2288	6.3255	5.9138	6.047	6.183	6.006	6.2123	6.2388	5.8991	5.9941
	689	70274			2	3.0841	2.504	3.8044	2	3.016	2.4115	2	2.5092	2.6153	3.456	3.1406	3.3942	2	2	3.4548	5.0323	3.7688	3.1768	3.7602	2.7126	3.5274	3.5192	4.1886	4.7676	3.4064	4.8623	4.038	5.3008	5.0062	4.6188	5.8412	5.4717	4.7042	5.522	5.9709	5.6095	5.4116	5.4597	5.7688	5.8935	5.3934	4.8476	5.5752	5.6309
	690	232174	ENSMUSG00000063415	Cyp26b1	4.4887	5.9598	5.4082	6.3498	5.9552	5.6731	5.7593	6.1222	5.7979	5.7067	5.4816	5.0406	5.339	6.701	5.4832	5.1714	9.5887	9.4021	9.4089	9.6971	9.6619	9.4024	9.312	8.7771	10.0238	9.3042	10.0785	9.2566	8.9389	9.3	9.2976	7.967	7.8857	7.941	7.7657	8.2301	7.9207	7.724	8.0675	8.2748	7.6983	8.2278	8.3416	7.7969	8.2559
	691	282663	ENSMUSG00000051029	Serpinb1b	7.1222	6.7115	6.8895	7.1092	6.9674	6.6744	6.7762	6.3918	6.7564	6.3825	6.5289	7.2305	7.055	6.8474	6.8422	6.4293	3.2436	4.9675	4.2577	5.029	4.6111	5.2436	2	4.1886	3.9653	5.7796	3.3078	4.9699	4.5377	3.9508	5.1233	5.6244	3.9747	4.0033	4.2881	4.5036	5.0173	4.4409	3.9617	4.628	4.5413	4.4428	5.1484	4.9485	4.1245
	692	320210			6.7417	5.275	5.3204	6.1391	6.0128	6.0743	5.6497	5.329	6.1298	5.5626	5.723	4.8924	5.7763	5.6422	5.8445	5.7211	7.2058	6.6712	6.6043	6.5412	6.7817	6.5602	6.6157	6.8403	7.1348	6.2055	6.8038	6.6749	6.5863	7.0801	6.2863	6.5235	7.0896	6.9584	6.5799	6.8659	6.3912	6.7157	6.7153	6.9446	7.1063	6.7083	6.3441	7.0617	6.6699
	693	12814	ENSMUSG00000027966	Col11a1	9.6991	9.441	8.3559	9.3902	8.4708	9.1349	8.7802	9.3416	9.4226	9.1511	8.9966	9.1328	9.4289	8.937	9.0525	8.8569	7.2322	7.3621	7.4235	6.8306	8.0889	8.2054	7.8041	8.0713	8.6921	7.2308	7.1268	7.9589	7.6018	8.3717	7.8277	7.9307	8.1466	7.6767	7.5791	7.8642	8.0442	8.5389	7.7311	7.5641	7.9651	7.8433	8.7265	8.0712	8.3112
	694	233071	ENSMUSG00000036882	Arhgap33	10.1542	10.5195	9.9896	9.9514	10.5219	10.3102	10.3679	10.301	10.2471	10.3424	10.0475	10.0357	10.235	10.1891	10.0065	10.042	12.8535	12.413	12.6861	12.4063	12.6095	12.4163	12.5526	12.6641	12.5556	12.7545	12.2047	12.5074	12.6513	12.6634	12.5187	10.8289	11.0626	10.9165	11.0916	10.7185	11.154	11.1929	10.8522	11.1817	11.2238	10.6465	10.8027	11.1878	10.8821
	695	208936	ENSMUSG00000053399	Adamts18	5.5083	5.6736	5.6675	5.3421	4.8061	5.9366	5.9562	5.1353	5.3661	5.1947	5.0968	5.1093	5.7416	5.194	5.6387	5.5168	5.0914	5.297	5.4706	4.9569	5.817	6.0055	4.8017	5.7353	5.5721	4.9706	6.3351	5.1823	4.5993	4.8586	6.1256	5.0198	4.6719	4.3254	4.8509	4.4692	3.7773	4.37	3.5072	3.8443	3.3258	3.5368	3.6533	3.2868	4.1245
	696	228787	ENSMUSG00000042631	Xkr7	6.3916	6.2631	5.3795	6.5676	6.1977	6.6155	6.0739	6.6433	6.0583	5.9075	5.8447	5.8331	6.3605	6.2873	5.7791	6.1749	6.1502	5.7485	5.0983	5.4526	6.1117	4.9824	5.0166	5.8216	6.146	4.2549	4.9337	5.5697	6.4593	5.6397	5.6221	5.8412	4.6346	4.1733	4.7711	4.5699	4.639	4.37	4.7065	4.7017	4.3837	4.8333	4.5865	4.7048	4.5494
	697	433809	ENSMUSG00000058498	Rnf207	6.067	5.6416	5.3503	6.4986	5.5123	5.7844	5.4894	5.0645	5.7979	6.0063	5.3231	5.4646	5.5938	5.4599	5.8122	5.7954	6.4726	6.9772	6.6772	6.3003	7.309	7.6693	5.8886	7.2252	7.6019	6.8842	7.1865	7.2349	7.4925	7.4591	7.6763	6.3457	6.2899	6.233	6.3656	5.6717	5.8895	5.9138	5.7124	6.3062	6.5043	6.019	5.9581	6.2659	6.2132
	698	78088	ENSMUSG00000045314	Sowahb	6.4307	6.5993	6.0233	6.0454	6.0407	6.6155	6.6492	6.0507	6.47	6.4307	6.7784	6.626	6.9218	6.6698	6.6904	6.4752	8.0059	8.1705	7.302	7.9514	7.5929	6.9743	8.1907	7.87	7.6339	7.0679	7.4648	7.5153	8.0225	7.6657	7.9647	7.4918	6.7313	6.8991	6.5444	6.8325	6.3389	6.6272	6.7439	6.7843	6.8888	6.7315	6.6346	6.2109	6.1987
	699	18798	ENSMUSG00000039943	Plcb4	10.8598	10.7349	10.8653	10.8498	10.6153	10.6899	10.7215	10.8275	10.9706	10.934	10.8202	11.0039	10.96	10.879	11.2124	10.8399	8.2779	8.9471	8.8585	8.6621	8.9462	9.0114	8.9345	8.6531	8.9763	9.017	9.044	8.8418	8.7918	8.3672	9.0653	9.6589	8.5263	8.4431	8.4175	8.5933	8.3185	8.3491	8.2077	8.0814	8.1722	8.2359	9.0638	8.2883	8.1874
	700	218476	ENSMUSG00000091387	Gcnt4	4.7987	5.3951	5.3795	4.8818	5.5123	5.6141	5.5312	5.9947	6.0022	5.1377	5.8447	5.8732	5.8102	5.484	5.8761	5.866	7.3579	7.0489	6.3155	6.8306	6.7984	6.8542	6.0599	7.3467	5.8148	6.7002	6.3869	6.4677	7.0935	6.2263	7.1687	6.6565	6.8337	6.9815	6.5563	6.6528	6.7326	6.9158	6.4803	6.6039	6.7176	6.6366	7.1428	6.6847	6.4899
	701	276920			4.9136	5.3562	4.7768	5.561	4.5963	5.5526	4.573	4.1946	4.1328	4.9184	4.7051	4.4376	4.2952	4.5854	5.0001	4.0475	6.3808	6.3967	7.5933	7.1864	6.9699	7.4066	7.128	6.005	7.4663	7.1275	7.9252	6.9748	6.8367	7.306	7.1789	4.1876	3.7134	3.5879	3.6491	3.6486	4.1249	4.8588	3.5072	3.9689	4.2066	3.0401	3.4162	4.5058	3.7769
	702	328967	ENSMUSG00000045094	Arhgef37	6.0997	5.7656	6.3681	5.7805	6.0407	6.4566	6.2594	6.2232	6.3403	6.0533	6.2492	5.2978	6.084	5.6635	6.2342	5.3297	3.6096	4.5399	4.518	4.3159	5.3136	5.9183	5.814	4.9202	4.9138	5.1727	5.0017	5.4921	5.0595	4.2165	5.0355	6.1061	4.6719	5.1738	4.8116	5.1711	5.3436	4.5086	5.4248	5.4217	4.5413	5.3036	6.3441	4.9259	5.2039
	703	14407	ENSMUSG00000055026	Gabrg3	7.1142	7.3688	6.7395	6.6173	7.2324	7.675	7.4778	7.9401	7.1408	7.3724	7.3406	7.4183	7.3597	7.5007	7.5194	7.2042	6.7543	6.2216	5.9244	5.7372	6.5057	6.2629	6.2975	5.7054	6.204	5.5375	6.7652	6.1769	6.1247	5.4463	6.1675	5.6755	6.2656	5.911	6.1458	6.3087	6.2138	6.2855	6.1361	6.0198	5.3703	6.0377	6.0851	6.173	6.0763
	704	330863	ENSMUSG00000036913	Trim67	8.1837	8.3951	8.3261	8.1344	8.5458	7.8768	8.3781	8.309	8.3951	8.5881	8.1024	8.0973	8.3707	8.0927	8.0495	8.0006	7.5491	7.0489	6.9218	7.0371	7.0133	7.0446	7.2743	7.8632	7.0893	7.7117	6.5549	7.7747	7.0935	6.9279	7.4319	8.0991	7.1169	6.9929	6.9317	6.7844	7.0977	6.7718	6.4283	7.2571	6.9179	7.0215	7.2	7.0565	6.9481
	705	235402			10.5909	10.4906	10.43	9.9466	10.8787	10.5572	10.3505	10.4877	10.2964	10.5928	10.2958	10.4005	10.2082	10.2073	10.5479	10.2964	12.8339	12.8067	12.5867	12.878	12.3708	11.9301	12.6507	12.3754	12.7506	12.3436	12.9279	12.7928	12.8885	12.7362	12.5144	11.8956	12.0843	11.9752	12.1595	12.0208	12.2263	11.9809	11.9845	12.0683	12.0737	12.1273	12.0203	12.0641	12.0619
	706	192650	ENSMUSG00000009075	Cabp7	7.3769	7.84	8.0447	7.4481	7.9293	7.7994	8.0008	7.7669	7.8402	7.9663	7.7596	7.6551	7.6111	7.5922	7.8004	7.4424	8.1861	7.0663	7.6577	7.5224	7.0416	7.5095	7.5404	7.1156	7.3683	7.7998	7.2717	7.7582	7.8113	7.6804	7.3524	10.887	10.9635	10.8962	11.062	10.7276	11.0025	10.5694	10.956	11.0556	10.9658	10.9925	10.916	10.7335	11.028
	707	12833	ENSMUSG00000001119	Col6a1	8.0436	7.5435	6.9973	7.6286	7.4971	8.6314	7.2465	7.4777	7.0424	7.4329	7.2663	7.3771	6.9525	7.6938	6.8894	6.7236	10.5977	10.4216	10.2697	9.8517	9.7001	10.9157	9.4752	10.3448	10.514	10.0074	9.2363	10.421	9.9625	10.878	10.1914	7.9307	8.4531	8.9262	8.9375	8.1964	9.4095	8.8275	8.2973	8.4824	8.1842	7.88	7.9381	9.2164	8.6241
	708	72535	ENSMUSG00000035561	Aldh1b1	7.2442	7.5348	7.5219	7.5876	7.0521	7.6605	7.1692	6.9089	7.1321	7.3724	7.3302	7.4974	7.1769	7.3117	6.6904	7.2312	7.109	7.3047	6.7634	7.3918	7.332	7.2488	7.4934	7.1715	7.2901	7.4567	7.3124	7.003	7.6389	6.9884	7.1687	7.6849	7.7438	7.6554	7.5008	7.685	7.7806	7.4421	7.6502	7.7318	7.5013	7.8539	7.4798	7.4815	7.8044
	709	17060	ENSMUSG00000061132	Blnk	4.6739	4.5946	4.5891	5.7211	4.1603	4.3474	5.1572	6.6311	5.3661	5.1083	4.1658	4.2061	4.7086	4.8305	4.2686	4.5546	6.9585	6.8221	6.3605	6.6366	6.164	6.9155	6.123	7.5373	6.5775	5.5375	7.1718	6.02	6.8239	7.0578	6.5779	6.4074	6.5223	6.8622	6.6261	6.8725	6.6275	6.744	6.7153	6.5846	6.4851	6.8096	7.1133	6.2109	6.8205
	710	14168	ENSMUSG00000031137	Fgf13	10.5307	10.3798	10.5451	10.3894	10.3733	10.3355	10.4133	10.2962	10.7294	10.4443	10.6646	10.7424	10.6889	10.6907	10.8056	10.6085	12.0633	11.7383	11.9664	11.7924	12.0761	11.7546	11.9586	12.0541	11.5277	11.6446	11.9303	11.7529	11.8917	11.8355	11.6207	11.9662	12.2173	12.1899	12.197	12.041	11.9418	12.0335	12.1035	12.0929	12.0435	12.1506	12.107	12.0303	11.9993
	711	208151	ENSMUSG00000070498	Tmem132b	10.846	10.8187	10.8092	10.7288	10.9122	10.8343	10.8591	10.8793	10.8639	10.8862	10.9188	11.0118	11.0327	10.9601	10.8757	10.9708	11.6386	11.6859	11.7175	11.6467	11.7569	11.3405	11.7202	11.7582	11.5779	11.5745	11.8803	11.5586	11.7344	11.6131	11.6254	11.6116	11.8049	11.8293	11.7839	11.8648	11.7515	11.7723	11.9189	11.9039	11.8068	11.8459	11.7746	11.9003	11.8067
	712	620246			7.0899	6.4777	6.2142	6.3692	5.6272	6.5223	6.5098	6.5164	6.9466	6.9021	6.4543	6.4249	6.9372	6.2735	6.8422	6.3819	6.2829	6.528	6.9661	6.7042	6.3335	6.7903	6.0599	5.5112	6.8194	7.0474	7.4282	6.3407	6.8869	6.9279	6.8464	4.6629	4.5164	5.2893	5.0669	5.1277	4.7231	4.635	4.1446	5.0223	4.8128	4.8755	4.528	5.2868	4.4043
	713	76183	ENSMUSG00000032297	Celf6	11.209	11.1576	11.1754	10.8489	11.2206	11.019	11.0089	10.9898	11.0384	11.0442	10.9394	10.9035	10.9429	10.9904	10.8128	11.0563	9.7669	9.2315	9.6201	9.4404	9.4803	9.668	9.5345	8.8812	9.5822	9.42	9.6744	9.5878	9.3412	9.3811	9.3463	8.6613	8.9926	8.9959	9.1278	8.917	9.1592	8.7974	8.6772	9.0707	8.7383	8.8387	8.576	8.7665	8.9193
	714	20289	ENSMUSG00000034161	Scx	6.2818	6.8012	6.1477	5.4188	7.106	6.9134	6.6301	6.1396	5.983	6.5226	6.5998	6.8634	6.2902	6.5608	5.5237	6.3819	5.0914	5.2368	5.7325	5.029	3.3767	4.3445	3.6959	2	5.8515	4.881	5.5021	4.5008	5.6007	4.8058	5.819	5.3692	4.6346	4.463	4.1686	4.0714	4.2434	3.4978	4.228	3.8443	4.2066	3.9848	4.3371	4.9927	4.5947
	715	269019	ENSMUSG00000039954	Stk32a	8.5579	8.7165	8.9654	8.9082	8.6263	8.5072	8.9668	8.7508	8.9462	9.0113	8.8733	8.7524	8.9093	9.0781	8.7106	8.8569	6.7543	6.2523	6.5664	6.3003	6.6954	6.3543	5.4203	3.6735	6.3134	7.2398	6.3613	6.1769	6.1861	6.3604	5.9686	6.8907	6.9822	6.7457	7.0207	6.9177	7.1365	6.9527	6.4283	6.8984	6.65	6.4259	7.4006	6.9145	6.7321
	716	207728	ENSMUSG00000110195	Pde2a	11.5688	11.5137	11.5767	11.4098	11.6827	11.5622	11.5637	11.3141	11.2819	11.4386	11.3311	11.3768	11.3489	11.3767	11.21	11.2428	13.825	13.5445	13.5463	13.5163	13.4981	13.3854	13.4492	13.3817	13.2486	13.432	13.4463	13.5173	13.4768	13.5941	13.3916	12.8777	12.9428	12.883	13.0595	13.0476	13.1324	13.0005	13.0288	13.1394	13.0391	13.0256	12.8611	13.1124	12.9973
	717	19817			3.7253	7.7898	5.6436	6.2691	6.0681	6.2781	6.284	5.7459	6.0765	6.2409	4.8283	8.2267	7.6111	5.531	5.996	6.4293	4.5329	5.1741	4.6686	4.3159	5.3136	3.3611	4.7223	4.1886	5.3842	4.9265	4.9337	6.856	5.475	5.9135	5.5288	5.6502	3.5625	4.7042	6.0476	4.9646	4.7231	7.0237	5.1532	5.8997	4.0048	5.3934	5.843	3.9999	5.1134
	718	21679	ENSMUSG00000030353	Tead4	3.8839	4.2987	3.5268	3.9145	2.3956	3.6062	4.3104	2	4.5526	3.9399	3.456	4.2061	3.975	3.5122	3.8261	4.0475	3.9014	4.0739	3.5316	4.1957	4.2727	3.935	3.5192	4.8119	2.4469	3.2719	2.453	4.1432	3.5964	3.358	3.1926	3.4739	3.9137	4.3959	4.1686	4.1165	3.6109	3.7421	3.6349	4.1898	4.1092	3.9056	3.6533	3.2141	4.3525
	719	259277	ENSMUSG00000064023	Klk8	4.5373	3.8156	4.6384	3.5553	5.1516	3.8301	4.7248	3.9014	4.2657	3.8716	4.5705	4.4376	4.5571	4.1763	4.5294	4.2721	5.3551	5.6596	6.0116	5.7372	5.3592	5.7265	6.2129	4.6948	5.6155	5.383	5.7197	5.1823	4.5377	5.223	5.7098	7.6597	7.7828	6.9231	7.6589	7.8543	7.6201	7.6585	8.0098	7.678	7.5761	7.8591	8.0923	7.3812	8.0437
	720	71685			7.879	8.0618	8.2489	8.157	8.118	8.2982	8.3434	8.6395	8.0482	8.0106	8.1024	7.9363	8.0756	7.8174	7.7156	7.8948	8.0586	8.6685	8.7144	8.2443	8.314	8.2714	8.3836	8.314	8.6033	8.0818	8.5197	8.7656	8.4723	8.1302	8.0952	8.6676	8.5959	8.9172	8.7833	8.7301	8.828	8.5867	8.7029	8.8656	8.2542	8.6482	8.5432	8.5819	8.8416
	721	238331	ENSMUSG00000048483	Zdhhc22	9.1029	8.795	8.7912	9.1412	8.9286	8.1399	8.4008	8.9006	8.3695	8.7031	8.4091	8.4485	8.4957	8.2625	8.3204	8.6524	8.1656	8.3796	8.3068	8.5745	8.2729	7.4382	8.5765	7.8149	8.6971	8.509	8.6892	8.7195	8.3701	8.2387	8.744	6.2646	5.9684	5.7854	6.5079	6.0543	6.2707	6.7157	6.047	6.2336	6.006	6.1101	6.4264	6.2109	5.6737
	722	22351	ENSMUSG00000038775	Vill	6.5538	6.6645	5.9472	6.4628	6.846	6.0743	5.8935	6.069	6.2469	6.3452	5.8447	6.0928	6.2413	5.8603	6.3056	6.0287	7.3458	7.2899	7.6396	7.6073	7.87	8.2888	7.203	6.9466	7.8492	7.5613	7.0646	7.791	7.4514	8.2682	8.1948	4.8961	5.5935	5.7854	4.8509	5.443	5.4946	5.9628	5.2362	5.5863	5.9787	5.1745	5.4611	5.9221	5.0819
	723	13195	ENSMUSG00000020182	Ddc	10.0997	10.1345	9.929	10.4248	9.5356	10.0004	10.3491	10.025	10.3013	9.6446	10.385	9.9749	10.2886	10.4672	10.0625	10.18	7.0206	6.94	7.5454	7.278	7.5444	8.1169	7.5747	6.8944	7.8216	7.7814	7.2578	7.0845	7.2261	7.4419	7.8853	7.3258	6.7401	6.6041	6.6926	6.9922	6.9487	6.8258	7.2522	6.7325	7.2157	7.2063	7.0209	7.6357	6.9217
	724	14396	ENSMUSG00000031343	Gabra3	11.2193	11.0504	11.2561	11.322	11.0568	11.2436	11.1975	11.2944	11.3087	11.2711	11.4304	11.5992	11.4322	11.4261	11.6196	11.7014	11.7659	11.6582	11.8327	11.7295	11.7186	11.7646	11.8601	11.8625	11.5063	11.3706	11.9133	11.5538	11.7369	11.7638	11.5718	10.0985	10.3968	10.4212	10.5046	10.3127	10.5102	10.7044	10.0852	10.3987	10.6404	10.2143	10.0622	10.5877	9.9167
	725	12821	ENSMUSG00000025064	Col17a1	2	3.2631	2.2739	4.2863	2.7057	3.016	2.4115	2.706	3.9864	2.9157	3.6013	3.1406	3.2034	2.2452	2.9669	3.6273	4.6941	3.3814	3.3651	4.0646	4.9461	2.7027	3.8532	2.8649	4.2114	4.0234	3.8409	2	3.5964	4.2952	4.0305	3.4739	3.2032	3.4622	2.4734	3.5858	5.6742	3.3581	2.3371	2.7205	2.6805	3.3097	5.0687	3.7136	2.4577
	726	269608	ENSMUSG00000039713	Plekhg5	9.3145	9.4822	9.2513	8.847	9.5084	9.5552	9.3951	9.0706	8.9609	9.2127	8.891	9.0909	9.0472	9.0176	9.1623	8.9329	10.4644	10.3666	9.9511	10.2769	9.7819	10.1257	10.0993	10.0846	10.3899	10.1603	10.1458	10.3879	10.3647	10.3869	10.4391	11.5509	11.5368	11.5112	11.4742	11.6046	11.6179	11.4007	11.8441	11.5053	11.6222	11.8148	11.4047	11.4239	11.8708
	727	75801	ENSMUSG00000021098	4930447C04Rik	6.518	6.5826	6.3236	7.1548	5.3432	6.838	6.668	7.1157	7.1058	6.3452	6.9645	6.8832	7.3711	7.0138	6.8261	7.3954	4.6941	5.297	4.8686	4.1957	4.0682	5.0926	4.9484	5.7353	5.6155	4.8341	5.1288	4.7207	5.7163	5.5462	5.1652	5.2394	5.9071	6.3261	5.3945	5.5619	5.0173	6.8521	5.0191	5.4217	5.452	6.4259	6.662	5.8155	5.5412
	728	16591	ENSMUSG00000058488	Kl	7.4164	7.4725	7.7237	7.2418	7.527	7.9738	7.6104	7.4079	7.2965	7.2634	7.5249	7.3489	7.7398	8.008	7.1828	7.7342	5.9731	7.4835	7.1944	7.7314	8.0477	7.5679	7.6192	8.1679	7.6127	7.6316	7.0646	7.6729	7.0719	6.8256	7.5395	9.0815	9.2808	9.1892	8.8649	10.3036	11.6622	8.9989	9.3002	9.0567	9.1001	9.2345	11.6083	10.1397	9.2196
	729	100502774			4.6739	3.4223	3.7223	4.8266	3.8171	4.1947	3.7269	2.706	4.1328	2.9157	4.0692	4.4376	3.7136	3.0783	3.9501	3.4548	6.9585	7.5344	7.1566	6.8306	6.9251	7.2004	7.203	6.5846	6.4395	6.7002	7.4158	6.6393	7.2455	6.9524	6.4981	5.5982	5.5339	5.911	5.5699	6.0543	5.0502	5.9138	6.0238	5.6621	5.1432	5.3036	6.023	5.7136	5.6947
	730	75429	ENSMUSG00000049154	Fam183b	7.1458	7.7148	7.9936	7.4573	8.0302	7.9738	7.9707	7.9302	7.5259	7.9374	7.3302	7.5965	7.4804	7.4948	7.2324	7.4879	5.7711	4.4368	6.4041	5.6484	6.5258	6.1654	4.7223	5.7647	5.7383	6.474	5.836	5.6433	5.1852	6.3233	6.2281	6.3457	5.938	5.7854	5.6614	6.2792	6.1844	6.3968	6.5947	6.0483	6.231	6.5351	6.1251	5.5459	6.4535
	731	216019	ENSMUSG00000069899	Gm12166	4.3864	4.5946	5.056	2.3528	4.5963	4.1947	5.402	5.7459	4.7009	5.1377	3.9657	4.0747	4.6348	4.1763	4.7501	5.1145	5.4025	6.5529	5.6979	6.5656	5.4463	5.5052	4.9484	6.353	5.9565	5.9653	6.0113	4.7207	7.0719	5.8101	5.429	6.6438	6.3602	5.9583	5.8284	6.6831	6.3652	5.7833	6.0698	6.2824	6.65	6.454	6.2388	6.4355	6.3115
	732	230810	ENSMUSG00000024007	Ppil1	4.2178	4.5261	4.9429	5.6905	4.8061	4.3474	5.0463	4.381	5.1424	5.1665	5.4816	5.1749	5.1402	5.194	4.9416	4.3726	7.1923	6.5529	6.5664	6.6595	6.9251	6.9886	6.8762	6.9466	6.4395	6.2775	6.1969	6.5076	6.4257	6.9884	6.5623	6.8015	6.6115	6.7987	6.9589	7.063	6.8863	7.0467	6.9046	6.6605	7.0418	7.0677	6.9223	6.5728	6.6593
	733	81879	ENSMUSG00000026380	Tfcp2l1	5.1815	5.1891	5.7143	3.9145	5.5516	5.1156	5.0463	3.9805	5.2744	5.4025	5.047	5.3556	4.5571	5.4354	4.9416	4.9291	7.6896	7.6193	6.9067	7.4716	7.9763	7.4996	7.081	8.0655	6.874	7.5395	6.9995	7.2468	7.8497	6.4831	6.5144	7.3258	6.9822	7.3793	6.8368	7.2365	7.3889	7.3437	7.3108	7.3517	7.3708	7.3327	7.5402	7.4541	7.0734
	734	13180	ENSMUSG00000020098	Pcbd1	9.1069	9.3349	9.3452	9.354	9.3639	9.0977	9.3752	9.1877	9.2204	9.3648	9.1343	9.2209	9.1956	9.2495	9.1687	9.2491	6.4274	6.0223	6.9067	6.7042	7.1363	6.7572	6.4031	6.7256	7.2631	7.2033	6.6639	6.9748	6.4426	6.6117	7.2093	6.1061	5.776	6.2896	6.1138	6.1333	6.1992	5.863	5.7967	5.9907	6.6842	5.8602	6.4103	6.0214	6.2702
	735	76886	ENSMUSG00000032224	Fam81a	9.7334	9.5741	9.4263	9.5458	9.5356	9.5195	9.3694	9.7053	9.3883	9.4389	9.4613	9.4336	9.7037	9.3995	9.4596	9.6774	12.0131	12.046	11.8559	11.9854	11.9579	11.7346	12.1227	11.8889	11.7039	11.8144	11.9557	11.8551	12.0147	11.888	11.9455	11.0294	11.2225	11.2846	11.2113	11.2005	11.1253	11.4595	10.984	11.3931	11.3229	11.0162	11.2353	11.2256	10.9888
	736	53860	ENSMUSG00000059248	Sept9	9.8461	9.7589	9.8889	9.7056	9.9579	9.7866	9.4935	9.6091	9.475	9.6949	9.5756	9.4797	9.4639	9.571	9.4931	9.6527	10.623	10.4957	10.671	10.5946	10.7734	10.66	10.39	10.7023	10.5011	10.4463	10.6122	10.584	10.6226	10.6159	10.4646	11.0458	10.9993	11.0107	11.2136	10.9989	11.4016	10.92	11.1636	11.1752	11.0354	11.1813	10.9821	11.0912	11.0842
	737	19130	ENSMUSG00000010175	Prox1	8.7811	8.5015	8.5805	8.5038	8.476	8.4065	8.644	8.1428	8.54	8.6223	8.5319	8.5006	8.658	8.4757	8.8203	8.3782	7.3698	6.9772	7.2552	7.4322	7.2129	7.5293	7.5519	6.2938	6.7235	7.9777	7.365	7.4347	7.0278	7.1559	7.4146	10.293	10.3884	10.4842	10.2028	10.4462	9.9261	9.8956	10.7234	10.2759	9.9102	10.2297	9.8975	9.6692	10.457
	738	14027	ENSMUSG00000034282	Evpl	9.3524	9.3572	8.963	8.6739	9.5283	8.9682	9.1253	9.455	9.0695	9.133	9.0323	8.976	8.8897	8.9216	8.8405	8.8306	7.927	7.9634	7.8902	7.9421	7.5245	8.0433	8.0433	7.1605	8.63	8.5423	8.2318	8.0631	7.9827	8.1673	8.3754	6.6309	6.64	6.1127	5.9603	6.5497	6.5023	6.2265	6.3926	6.8012	6.5421	6.2766	6.5193	6.5945	6.4778
	739	16504	ENSMUSG00000062785	Kcnc3	10.8186	10.291	10.034	10.1189	10.5366	10.3055	10.1935	10.4526	10.3536	10.3666	10.2261	10.1885	10.1432	10.1641	10.4594	10.3108	10.6527	10.2478	10.3652	10.4883	10.3004	9.9055	10.3884	10.3949	10.6441	10.2536	10.8875	10.4986	10.5298	10.3768	10.293	12.3384	11.8911	11.8471	11.7129	11.7919	11.8192	11.5078	11.8354	11.7987	11.5864	11.878	11.635	11.4815	11.9413
	740	332110	ENSMUSG00000063704	Mapk15	7.3702	7.4816	7.3328	7.3339	7.5369	7.2208	7.7932	7.3195	7.3043	7.403	7.0042	6.8434	7.0408	7.0303	7.1953	6.7977	7.2058	5.4102	6.5664	6.0804	6.4435	6.9452	5.7752	5.7054	6.533	6.5192	5.3007	6.6923	6.1036	7.0464	6.4816	4.8961	4.4319	5.1332	5.1323	5.1277	5.7761	5.863	5.0652	5.5063	5.452	4.699	5.7438	5.6461	5.289
	741	73884	ENSMUSG00000027520	Zdbf2	11.2188	11.1412	11.2974	11.8727	11.1154	11.348	11.4021	11.6063	11.6216	11.3613	11.5319	11.7755	11.7052	11.8274	11.58	11.6641	10.1365	9.96	10.2887	9.8114	10.484	10.3139	10.4233	9.5224	9.8094	10.2435	10.0547	10.1419	9.6482	9.6386	10.0389	8.6864	9.1497	9.608	9.4433	9.0229	9.3759	9.3587	8.9129	9.3103	9.0874	8.8091	8.998	9.3864	8.9867
	742	101544	ENSMUSG00000066721	Zfp575	7.1222	7.1587	7.016	5.8924	7.106	7.2009	6.5911	6.9389	6.6631	6.7296	6.5647	6.9027	6.9825	6.5264	6.4172	6.5839	7.4845	7.1004	6.9367	7.1383	7.0693	6.9743	6.8578	5.9293	7.513	6.9844	7.2989	6.8866	7.2261	7.2868	7.3524	6.2976	6.5626	6.7724	6.6486	6.4027	6.7326	6.5329	6.4972	6.6788	6.9604	6.6609	6.3098	6.3276	6.6699
	743	237175			7.0981	6.9782	6.9783	6.7118	7.1322	6.985	7.2212	7.1588	7.5456	7.0638	7.5339	7.0323	7.5422	7.4948	7.1181	7.1056	6.0041	5.2368	5.6624	5.9748	5.5678	5.8572	5.9938	6.7552	6.1752	5.0549	5.7983	5.6069	6.4426	5.3013	5.5606	4.6629	5.2674	5.1738	4.7711	5.1923	4.9837	5.2629	5.2759	4.8386	4.9315	5.1054	5.5222	4.7823	5.2039
	744	216033	ENSMUSG00000060843	Ctnna3	4.0269	5.1441	5.2268	3.4125	5.2976	6.1593	5.5718	4.6464	5.7758	4.8842	5.145	5.6605	4.7086	5.3063	5.1105	5.4723	4.3515	4.8113	3.5316	4.1957	4.0682	4.3445	2.4576	3.5441	4.8426	5.2463	3.8409	3.3524	4.6583	3.4976	3.1926	5.3057	5.1131	4.5272	4.4507	5.1711	4.5951	5.5783	4.8184	4.628	4.4646	4.7452	4.7488	4.4113	4.9134
	745	244958	ENSMUSG00000042761	Mrap2	9.4728	9.489	9.841	9.3219	9.6465	9.3308	9.4092	9.2186	9.4629	9.4953	9.2517	9.5118	9.4425	9.4262	9.4359	9.3816	8.0059	7.7325	8.3796	8.1341	8.3484	8.3622	7.4072	7.9867	8.0041	7.818	8.3988	8.0698	7.8623	8.0643	8.3619	5.6244	5.5339	6.0485	6.5201	5.9709	6.821	6.5329	4.9223	6.0198	6.2077	5.8176	6.2204	6.2015	5.5641
	746	216795	ENSMUSG00000000126	Wnt9a	6.9888	5.8238	5.9075	5.9709	5.8644	5.2764	5.794	4.8705	5.3661	5.8015	5.7544	5.4646	5.0295	5.3593	6.6544	5.7211	7.8088	7.6074	7.9865	7.988	7.5737	7.0717	6.8391	7.8358	7.547	7.7374	8.0905	7.3711	8.5248	8.0643	7.8664	6.9437	7.1701	7.0043	6.5682	6.6218	6.7122	7.3062	7.0145	6.9294	7.567	7.0215	7.1906	7.1126	6.5601
	747	12266	ENSMUSG00000024164	C3	6.2087	6.7719	7.0888	7.0621	6.8773	6.3156	7.6677	5.9364	6.8009	6.9771	6.5998	6.4249	5.8757	6.7514	5.9373	6.5197	2	4.6362	4.518	3.1334	6.0573	4.431	2	5.5454	3.6684	5.7796	2.7973	4.9699	4.715	5.223	4.4927	5.3999	4.9705	5.2134	4.8893	5.6412	4.8777	6.4145	5.8504	5.4217	5.7714	5.3641	6.8762	6.4032	5.5641
	748	76969	ENSMUSG00000027221	Chst1	11.4366	11.4745	11.4595	11.1845	11.657	11.4633	11.3512	11.1719	11.066	11.3227	11.2223	11.1354	11.2169	11.1916	11.1213	11.1173	12.3299	12.1768	12.3336	12.3555	12.1898	12.1655	12.2475	12.1542	12.3353	12.1705	12.5549	12.3497	12.3506	12.3966	12.3314	12.332	12.3306	12.3119	12.4248	12.4398	12.4646	12.2717	12.4955	12.5267	12.4704	12.6312	12.2441	12.3443	12.6051
	749	70127	ENSMUSG00000021221	Dpf3	5.6253	5.9069	6.06	6.1616	5.8953	6.4566	5.8935	4.5971	5.8197	5.4961	5.145	6.0584	5.8102	5.6422	5.3089	4.7907	4.9707	5.4102	5.2965	5.2259	6.2391	5.5445	5.2608	4.9715	5.4812	5.4468	5.4543	4.6511	4.7695	5.8367	4.6188	6.9541	6.8582	6.7457	6.9225	6.6528	6.4292	6.3236	7.0944	6.623	6.4256	6.9543	7.0209	6.4593	6.9568
	750	30928	ENSMUSG00000063659	Zbtb18	9.6196	9.7514	9.841	9.7151	9.7663	10.0679	9.8906	10.047	9.9	9.7157	9.9975	9.9161	9.9209	10.0243	9.9593	9.9896	12.2092	12.1693	12.0792	12.0496	12.0191	11.8626	11.9828	11.9961	11.8313	11.7118	12.4512	11.9084	12.2214	11.9843	12.0245	13.4889	13.489	13.5245	13.3991	13.4599	13.2459	13.3452	13.4927	13.3459	13.3268	13.546	13.4074	13.1656	13.368
	751	12364	ENSMUSG00000025887	Casp12	5.0868	4.2987	4.3732	2	3.3659	4.1947	4.1044	4.2594	3.9073	4.2398	3.7332	4.7273	3.8502	4.9735	4.0642	4.0475	2.4243	3.7688	3.8162	3.9204	3.9539	5.0926	3.8532	2	3.2942	4.2549	2	3.3524	4.7695	3.9508	5.0355	4.3219	4.0333	3.1724	3.5568	3.4515	2.9514	4.2167	4.4528	4.1898	3.6366	3.733	5.0687	3.9107	3.3182
	752	212111	ENSMUSG00000025477	Inpp5a	10.2448	10.0379	10.0329	10.4513	10.1844	10.3649	10.0872	10.0297	10.0856	10.1232	10.2359	9.9749	10.1761	10.0386	10.2864	10.1538	9.8071	10.0847	9.4089	9.8088	9.7651	9.9665	10.1906	9.638	9.9108	9.9439	10.0627	9.9916	9.9625	9.7597	9.7039	10.6735	9.7011	9.4801	9.6541	9.6263	9.6658	9.7976	9.5597	9.6168	9.5439	9.6607	9.8565	9.458	9.6929
	753	20855	ENSMUSG00000014813	Stc1	6.6997	6.4957	6.7167	6.1162	6.1977	6.4226	6.2088	6.8041	6.428	6.2136	6.4543	6.9597	6.6497	6.7514	6.7767	6.8682	7.1373	6.7378	7.0232	6.9836	7.309	6.6886	7.4447	6.7841	6.2321	7.3101	7.1115	7.1107	6.8494	6.4491	6.9461	5.8853	6.0837	6.308	6.445	5.8822	5.8895	6.3968	6.0698	6.3297	5.6726	5.7737	6.0647	5.8638	6.3383
	754	56876	ENSMUSG00000006476	Nsmf	11.6518	11.6859	11.431	11.4747	11.9956	11.5573	11.4915	11.5772	11.4454	11.7601	11.6367	11.3706	11.3781	11.3609	11.6841	11.2869	13.8356	13.2996	13.627	13.5512	13.5446	13.5718	13.4405	13.4125	13.1302	13.524	12.9954	13.5959	13.5349	13.5208	13.4509	14.0716	14.035	13.9774	14.1035	13.8994	14.1531	13.8486	14.0704	14.1483	14.0765	14.1007	14.0863	14.0463	14.1239
	755	74342	ENSMUSG00000060780	Lrrtm1	9.9496	9.8228	9.6364	9.3589	10.2015	9.9624	9.5352	9.4253	9.419	9.723	9.6547	9.783	9.6249	9.6503	10.0313	9.7328	10.677	10.4957	10.5415	10.7156	10.2361	10.2749	10.5027	10.5044	10.3535	10.4385	10.7259	10.6037	10.5908	10.65	10.7953	10.8978	11.2323	11.0467	11.216	11.1444	11.3043	10.9515	11.1124	11.0869	11.089	11.2434	11.0832	11.0991	11.2218
	756	19016	ENSMUSG00000000440	Pparg	2	2.8797	3.7223	2	2.7057	2.5956	3.5754	2	3.7345	3.6451	3.7332	2.8505	3.5627	3.8454	3.1845	3.7814	4.6941	4.4368	4.988	4.5298	4.6111	4.5898	4.9484	3.6735	4.0936	4.7856	4.2293	4.1432	5.5703	4.9587	5.1233	5.4882	4.3877	4.1733	4.5011	5.1277	4.639	5.3392	4.5852	4.5504	4.0048	4.4428	4.8947	4.8559	4.7226
	757	18752	ENSMUSG00000078816	Prkcg	9.8641	9.7096	9.3246	9.5963	9.8981	9.5434	9.2895	9.5856	9.4332	9.6825	9.6039	9.537	9.2115	9.3131	9.8836	9.5028	12.654	12.775	12.5935	12.8192	12.4147	12.1943	12.6301	12.5781	12.7664	12.2092	13.216	12.57	12.7569	12.7467	12.4842	13.2228	13.1863	13.1259	13.3135	13.229	13.3539	12.9792	13.2723	13.2496	13.203	13.273	13.1559	13.2824	13.2236
	758	245578	ENSMUSG00000034755	Pcdh11x	8.3729	8.6171	8.5486	8.7685	8.4862	8.8129	8.6487	8.7137	8.8356	8.7888	8.7424	9.0168	8.8777	8.833	8.6616	9.005	7.68	7.7648	8.1933	8.0672	8.0753	8.2596	7.9506	7.4587	7.84	8.4323	8.3733	8.337	7.579	7.8399	8.106	6.2812	6.2778	6.2521	6.2817	6.3184	6.6166	6.6868	5.7967	5.8997	6.231	6.1276	6.1052	6.6087	5.9941
	759	59058	ENSMUSG00000025128	Bhlhe22	7.3968	7.6194	7.1748	7.4663	8.0302	7.9261	7.5809	7.1588	7.6095	7.5467	7.7283	7.6551	7.7309	7.7244	7.7839	7.753	11.2648	10.5993	11.3002	10.9806	10.7339	10.9426	10.672	10.7453	10.2506	10.7855	11.1205	10.5449	11.0297	11.0267	10.9023	11.1174	11.318	11.3364	11.1956	11.1939	11.0847	11.1986	11.2873	11.3579	11.3079	11.4207	11.1501	10.9708	11.2495
	760	230777	ENSMUSG00000028778	Hcrtr1	7.1768	7.1811	7.1238	6.5162	7.0658	7.523	7.0305	7.357	7.0789	6.7677	6.8528	7.2149	7.4591	7.1852	7.1048	6.5628	5.5361	4.8915	4.988	5.6484	6.0573	6.1399	5.5175	3.7923	6.5101	5.8985	6.5994	6.1769	5.9702	5.8884	5.6812	4.6629	4.9705	4.8111	4.8116	5.1923	4.5031	5.0971	5.389	4.9025	4.4646	4.6512	4.6967	4.9485	4.9832
	761	54562			6.7623	6.9393	6.9783	6.093	6.4887	6.838	6.7935	7.0438	6.687	6.7956	6.6169	6.9219	6.7751	6.6803	6.5603	6.8334	5.9413	6.2523	6.2925	6.2708	5.9718	6.5213	6.8391	7.3563	6.1161	6.789	6.4369	6.4677	6.9114	5.8884	7.1993	5.6755	5.9071	6.1741	5.9959	6.1112	6.0768	6.2661	5.9764	6.0198	6.2766	5.8602	5.7179	5.9335	5.907
	762	100503874			2	5.0976	2.8767	2.8726	3.6818	4.6115	4.4034	4.2594	3.6397	4.1272	5.1916	3.1406	4.7086	3.8454	3.3735	3.7814	4.0277	5.9492	3.5316	3.5799	4.7546	5.7933	3.318	6.1895	6.0855	4.2549	4.7079	4.5008	5.4418	5.4463	6.0153	4.7126	4.7438	4.7042	3.8949	3.7087	4.1854	4.5086	4.1446	4.0836	6.3423	5.6817	5.492	5.8399	3.9953
	763	22066	ENSMUSG00000027748	Trpc4	7.9435	8.0497	8.3958	8.4315	8.3421	8.555	8.1822	8.2974	8.062	8.114	8.084	8.1472	8.3009	8.154	8.0701	8.121	8.1095	7.9353	8.2482	8.2367	8.2907	8.4162	8.0103	7.2669	8.0523	8.3133	8.1214	7.7077	7.7982	7.8978	7.6544	9.5706	10.0485	10.0364	9.8979	10.0373	10.0864	9.9529	9.8733	9.9661	10.1325	10.0249	9.5224	10.0801	9.8175
	764	53626	ENSMUSG00000068154	Insm1	8.4542	8.121	7.5986	7.7524	7.9067	7.962	7.7229	7.8482	7.9725	7.7552	7.9548	7.5723	7.929	7.7594	7.733	7.6567	6.8256	6.8424	7.2312	7.233	6.8945	6.4192	6.9125	7.1824	7.5015	7.3015	7.0961	7.1107	7.5866	7.1664	6.5623	7.1108	7.5061	7.154	7.2588	6.7274	7.5121	7.3893	6.8791	7.7141	7.6032	7.247	7.4248	7.2956	7.1129
	765	216049	ENSMUSG00000037855	Zfp365	11.2763	11.3282	11.3843	11.5989	11.4409	11.4517	11.3672	11.3975	11.4402	11.4448	11.6091	11.5902	11.5057	11.4977	11.6085	11.5224	13.8249	13.7298	13.7613	13.6484	13.9293	13.6972	13.8731	13.7384	13.4276	13.6477	13.6764	13.6786	13.911	13.6465	13.698	13.0758	13.1978	13.0765	13.1858	13.0855	12.9961	13.2119	13.1123	13.2622	13.2206	13.0561	13.1887	13.1361	12.9436
	766	20563	ENSMUSG00000031558	Slit2	10.2791	10.5607	10.4866	10.8958	10.652	10.6574	10.7124	10.6101	10.5455	10.5994	10.4714	10.6588	10.7513	10.6945	10.3623	10.2948	9.2845	9.4258	9.1803	8.9209	9.2873	9.0392	9.407	8.7985	9.3451	9.3171	9.7431	9.3585	9.3964	8.9809	9.1409	9.0431	9.4502	9.884	9.9521	9.5727	10.0132	9.8294	9.3935	9.7378	9.15	9.459	9.3665	9.6339	9.4527
	767	244682	ENSMUSG00000039488	Cntn5	7.5348	7.7148	7.9405	7.177	7.6409	7.9382	7.7318	8.3166	7.622	7.6674	7.6302	7.8685	7.6584	7.8268	8.0837	7.7623	7.8859	8.1131	7.455	7.3502	7.8301	7.4692	8.2972	7.4854	7.4181	7.5248	7.7582	7.7416	7.4176	7.4505	7.571	5.9068	5.6693	6.4136	5.5699	5.9952	5.5872	6.4834	6.1361	6.0483	5.8639	5.9418	6.4103	5.9781	5.7357
	768	329977	ENSMUSG00000051435	Fhad1	8.7633	8.8968	8.8368	9.1126	8.906	8.8957	8.9125	8.7079	8.629	8.7346	8.6156	8.6581	8.963	8.5827	8.5631	8.7675	6.4043	7.1338	7.1819	7.4586	7.0133	7.5487	7.1735	6.5344	6.7626	7.4949	7.6773	7.3602	7.0278	7.4929	7.3063	7.3575	7.4695	7.3706	6.9857	7.4541	7.7509	7.5261	7.6119	7.1559	7.4722	7.6504	7.9098	7.2554	7.4817
	769	26949	ENSMUSG00000034993	Vat1	12.1915	12.3439	12.3623	12.1139	12.4872	12.1681	12.2852	12.1205	12.0408	12.2482	12.0596	11.9408	11.9595	12.1408	11.9947	12.0545	9.6266	9.9623	10.076	10.0093	9.7437	10.2779	9.849	9.9166	10.1305	10.4098	10.1019	10.2636	9.8859	9.9841	9.8525	8.8703	8.6295	8.3707	8.7129	8.3717	8.7017	8.6813	8.7566	8.7747	8.3796	8.554	8.5209	8.6472	8.6671
	770	80718	ENSMUSG00000024511	Rab27b	10.3317	10.3367	10.7453	10.5727	10.2092	10.4432	10.3694	10.4077	10.7879	10.4436	10.7508	10.9393	10.8685	10.8246	10.918	10.9887	9.5706	9.4525	9.7482	9.5082	9.5434	9.6791	9.2777	9.1495	9.3832	9.5345	9.7847	9.5186	9.5049	9.3213	9.6733	9.7376	10.1496	10.1905	10.026	10.0577	9.8925	10.1915	9.8537	10.0548	10.0215	9.9541	9.8128	9.9405	9.791
	771	67784	ENSMUSG00000030123	Plxnd1	8.4158	8.7767	8.4759	8.3259	8.9872	8.4323	8.265	8.1385	8.3584	8.5721	8.369	8.2648	8.2149	8.4361	8.2069	8.1566	12.2442	12.2055	11.9619	12.243	11.9467	11.4449	12.0391	12.0633	11.897	11.9533	12.068	12.1626	12.1783	12.1794	12.022	9.2039	9.2884	8.8085	9.0934	9.1665	9.0291	9.5352	9.1236	9.3074	9.2815	8.8413	9.2265	9.2967	8.7915
	772	14264	ENSMUSG00000041559	Fmod	4.2178	5.1891	6.1305	6.1616	6.1977	7.1602	6.4888	5.8337	5.507	5.328	5.9297	4.5407	5.2431	8.2272	5.6387	5.5601	8.3583	9.3211	8.385	9.7725	8.5188	9.9593	8.6799	9.7376	9.4173	9.2605	7.4527	8.9253	9.4703	7.8659	8.9531	6.5511	6.3487	7.3793	7.0378	7.3111	6.7224	8.0533	7.0378	7.169	6.8289	6.5867	6.164	7.7494	6.3647
	773	83453	ENSMUSG00000031283	Chrdl1	3.8839	5.7049	5.3503	2.8726	5.2506	5.1156	5.5718	6.0507	5.8623	5.5408	6.2044	6.1591	6.2413	6.0658	6.1068	5.6825	8.8047	8.5124	8.4013	8.6621	8.8695	7.4486	8.5878	9.2924	7.9877	7.5025	8.537	8.2747	8.583	8.3626	8.3392	6.6565	6.7748	6.8116	6.6147	6.6831	6.3652	7.0121	6.7439	6.9597	6.4655	6.454	6.9888	6.678	6.4411
	774	104175	ENSMUSG00000042978	Sbk1	10.218	9.967	10.2205	10.1015	10.2517	10.224	10.2	10.1425	10.0968	10.1922	10.1632	9.9954	9.9072	10.1613	9.9904	9.9434	11.5978	11.1272	11.1861	11.255	11.1696	10.8978	11.3471	11.0993	11.2898	11.4713	10.9274	11.5003	11.2032	11.1303	11.0468	11.9585	11.2432	11.0351	11.3231	11.0426	11.4765	11.0512	11.1463	11.3833	11.2788	11.0981	11.0137	11.2392	11.2654
	775	237397	ENSMUSG00000045912	C2cd4c	9.3232	9.3865	8.8886	9.0922	9.2931	9.1084	8.8354	9.3114	8.8881	8.9527	8.8297	8.7088	8.9479	8.8376	8.6751	8.8039	9.3824	9.2004	9.5071	9.2117	9.2023	9.2018	8.9389	8.9209	8.8861	8.7556	9.1897	8.9653	9.192	9.1279	9.1721	7.9924	8.2795	8.5318	8.4722	8.2429	8.5575	7.9168	8.3022	8.5032	8.0331	8.307	7.6539	8.4691	8.3314
	776	228911	ENSMUSG00000047907	Tshz2	10.3981	10.3127	10.5572	10.301	10.4689	10.5553	10.4327	10.3001	10.1771	10.4611	10.3249	10.4428	10.4192	10.3311	10.1891	10.4042	9.9275	10.1695	10.2623	10.1634	10.4994	10.2153	10.4574	10.0552	10.3293	10.459	10.2333	10.2356	10.0656	10.0323	10.0319	10.7604	10.6725	10.8349	10.3179	10.8768	10.4005	10.6037	10.7243	10.6497	10.7566	10.3363	10.5943	10.6412	10.2933
	777	18386	ENSMUSG00000050511	Oprd1	7.2072	6.8299	7.0253	5.0839	6.8927	7.2208	7.401	6.9585	6.6631	6.9359	6.7475	7.0145	7.0265	6.8567	6.8422	7.4073	8.1378	7.6542	8.1808	7.6875	7.7553	7.5293	7.7043	6.9077	7.8939	7.0163	7.8897	8.0564	8.0722	7.5897	7.4742	8.0272	8.2335	8.257	7.9939	8.2805	8.2494	8.0701	8.0618	8.3963	7.621	7.9605	7.7968	8.1682	8.231
	778	21858	ENSMUSG00000017466	Timp2	13.7941	13.7295	13.7593	13.6963	13.7846	13.6568	13.6416	13.7116	13.66	13.6709	13.6732	13.7749	13.6658	13.7036	13.7288	13.7639	13.3268	12.9729	13.4379	13.3016	13.1649	13.4391	13.2149	13.1654	13.1562	13.342	13.4637	13.254	13.2654	13.279	13.2946	11.9143	12.2729	12.5358	12.5817	12.2727	12.7907	12.6043	11.9867	12.5002	12.4838	12.0797	11.9962	12.7246	12.0303
	779	13411	ENSMUSG00000018581	Dnah11	7.0233	6.858	6.8895	7.4843	7.2324	7.2009	7.3897	7.2007	7.2411	7.2701	6.3757	6.9027	7.055	6.911	6.7428	6.3819	6.2829	5.1741	6.0669	4.7161	5.6062	5.2436	3.5192	5.7647	3.2942	5.8521	3.075	5.08	4.7695	4.9587	5.8957	5.7958	5.6693	5.2893	4.8509	5.3889	5.9776	5.863	5.7692	5.6621	6.006	5.0327	6.5924	5.8638	5.7951
	780	14867	ENSMUSG00000068762	Gstm6	9.0846	9.0479	9.1078	8.6139	8.7625	9.2015	9.0192	9.034	8.8221	8.9772	8.8875	8.6752	8.9818	8.7133	8.8284	9.0775	7.4283	7.0835	7.8434	7.4189	6.9845	7.6514	6.701	6.005	7.6019	7.078	7.2011	7.4654	7.1866	7.3248	7.5865	7.2853	7.6393	7.1842	7.3982	7.4186	7.5297	7.4847	7.4649	7.641	7.1921	7.4489	7.073	7.4853	7.558
	781	330230	ENSMUSG00000093910	Zfp853	6.8125	7.359	7.1748	7.2098	7.4458	7.3348	6.8606	6.9189	7.0237	7.1599	6.9778	6.7169	7.1769	6.9198	6.6904	6.5414	7.3458	7.3047	7.8902	7.4845	7.6306	7.5869	7.3019	7.7282	7.1788	7.4095	6.6427	7.7829	7.1147	7.6804	6.9699	6.4074	6.6494	6.8497	6.6032	6.1976	6.5376	6.5329	6.3373	6.8343	6.3636	6.44	6.183	6.3276	6.5018
	782	434784	ENSMUSG00000057615	Ldoc1	5.8725	4.8953	6.1305	6.2056	3.8171	5.1156	5.6113	5.4727	5.0715	5.2762	5.2368	5.2377	5.1402	4.9391	5.4832	5.1714	5.2027	4.2053	5.954	4.7161	5.4034	4.5126	2	5.4762	3.4934	4.7856	4.9337	4.6511	5.1445	5.2627	5.4631	4.6114	4.5569	4.463	5.6833	4.9397	5.1447	4.806	5.0191	5.0787	5.1432	4.7899	4.6967	5.2868	4.6812
	783	66259	ENSMUSG00000046447	Camk2n1	12.7853	12.7589	12.5619	12.7879	12.8269	12.6819	12.6788	12.6989	12.8474	12.7085	13.1212	12.9773	12.9419	12.8872	13.0492	13.016	15.289	15.2272	15.1528	15.3047	15.4249	15.0903	15.3288	15.5304	15.0131	15.162	15.0903	15.0968	15.5112	15.1591	15.2735	14.1439	14.168	14.2643	14.0837	14.1284	13.7955	14.3664	14.0317	14.329	14.3234	14.196	14.3702	14.058	14.0648
	784	100861910			2	4.3785	3.5268	4.0168	4.5963	4.4855	4.2111	2.2755	4.2657	3.8	4.0692	4.8924	4.5571	3.7691	4.0642	4.1642	6.4502	6.0223	6.2453	6.1787	6.5457	4.863	5.5638	5.8765	5.7771	6.2598	6.6639	5.8123	6.7979	6.3786	6.0825	7.2007	7.3821	7.1941	7.5554	7.3111	7.2112	7.218	7.4034	7.0186	7.5298	7.3327	7.3082	7.3305	7.2816
	785	240332	ENSMUSG00000052026	Slc6a7	10.843	10.7187	10.5346	10.363	10.573	10.3738	10.4882	10.5236	10.3895	10.5828	10.395	10.4626	10.3746	10.2822	10.4942	10.3234	10.9051	10.8178	10.6164	10.7333	10.6538	10.8515	10.5905	10.8109	11.1658	10.5589	11.1433	10.8205	10.8913	11.1107	10.8781	10.057	10.2127	10.3816	10.4961	10.2388	10.4781	10.3473	10.2212	10.3973	10.4572	10.2438	10.1091	10.4569	10.3381
	786	243277	ENSMUSG00000044017	Adgrd1	4.1569	4.4542	3.0323	4.2863	4.3508	3.016	2.7312	5.0645	3.6397	3.8	3.8541	3.5887	2.7237	3.1996	4.7501	4.4665	6.1222	6.3118	6.1715	6.3003	6.4852	5.6919	5.814	6.123	4.9817	5.9869	6.0113	6.3184	6.1247	5.339	6.2672	4.4447	4.4747	4.2514	4.2881	5.1711	4.9837	5.5783	3.7523	4.5504	4.9315	4.4428	4.2673	5.531	4.6812
	787	272790	ENSMUSG00000031224	Magee2	8.7034	8.852	8.9213	8.4905	8.4133	8.9741	8.8271	8.9965	8.7417	8.6808	8.7345	9.0302	8.829	8.87	9.0455	8.8698	7.7366	7.7325	8.0428	7.8456	7.8462	7.7887	7.6192	7.9616	7.6549	7.6855	7.4768	8.0429	7.6093	7.7238	7.8853	7.6015	7.8081	7.6116	7.8063	7.9601	7.6364	7.4931	7.635	7.8171	7.7955	7.9408	7.0933	7.7267	7.6786
	788	22420	ENSMUSG00000033227	Wnt6	4.5373	4.5946	4.4852	2.8726	2.7057	4.8347	3.9892	2	3.9864	4.4416	3.9657	3.7695	2.4067	5.823	3.9501	4.7162	6.6203	6.1582	5.626	7.2176	5.4463	7.1246	6.1836	5.3656	6.3652	6.3121	5.3007	5.9636	6.6889	4.6348	6.0825	4.3219	2.5738	4.5886	4.6866	3.9767	4.0617	3.6251	3.9617	3.9689	4.0048	4.3856	4.2673	3.8639	3.5195
	789	73001			4.9499	4.66	4.5381	4.4415	5.5899	5.0279	4.3104	5.5263	4.7918	4.3937	4.7051	5.5659	5.7763	5.04	5.1105	4.9936	6.4043	7.1338	6.6043	6.8103	6.9699	6.4192	5.9938	6.568	6.487	6.3953	5.9437	6.1264	6.5863	6.0783	6.7805	5.8412	6.4489	5.8114	5.6833	6.1658	5.5183	6.3422	6.6103	5.3774	6.2766	5.7958	6.1052	6.2295	6.1234
	790	100504545			4.0269	3.4223	2.504	2.8726	4.4374	2.5956	3.7269	2	3.1825	3.5609	3.6013	3.1406	3.975	3.7691	3.8261	2.4311	3.6096	3.3814	4.805	3.7602	3.5441	5.1447	2.4576	3.2441	3.0631	4.0234	3.8409	4.6511	4.0129	4.9095	4.4252	5.205	4.7785	5.0483	4.9985	4.4692	4.7231	4.2167	4.8713	4.9025	4.6834	4.0598	4.5865	3.8639	4.9134
	791	20312	ENSMUSG00000031778	Cx3cl1	12.5349	12.4996	12.2667	12.3262	12.5322	12.3683	12.3299	12.2664	12.2578	12.3824	12.2572	12.2927	12.2137	12.2142	12.4385	12.2834	13.5893	13.6376	13.5387	13.6681	13.4691	13.1482	13.6341	13.5281	13.6799	13.4431	13.8538	13.6094	13.7056	13.605	13.4836	13.2804	13.3385	13.2255	13.2681	13.4412	13.4534	13.1923	13.4671	13.3703	13.3379	13.4238	13.2095	13.3368	13.3859
	792	14067	ENSMUSG00000026579	F5	2.4693	4.5261	4.9816	5.5268	5.4718	4.9345	5.0463	5.5263	4.8774	4.9519	4.5705	4.8122	5.1926	4.4452	4.8168	4.3726	4.7683	5.0397	4.988	4.7161	5.4879	4.9239	3.6959	4.7546	4.4215	5.7033	3.9824	4.9699	4.9218	4.2165	4.4252	5.2394	5.6319	5.5586	4.6866	7.7686	9.5398	4.6943	5.7124	4.7017	6.0328	4.6019	9.7788	7.9448	5.5412
	793	74116			7.138	7.0892	7.0253	6.0454	7.3927	7.2009	7.1425	6.7932	6.8226	7.1527	6.8528	6.8025	7.1769	6.9286	6.4596	6.7795	4.2514	4.4368	6.0116	6.046	5.1151	6.2391	5.0816	5.021	6.874	5.2817	5.5021	5.4102	5.5703	4.9587	5.5288	4.0395	4.0333	4.1733	3.1145	4.2439	3.9265	3.7421	3.8608	3.1988	4.7496	3.6382	3.9489	3.8155	4.1245
	794	433323	ENSMUSG00000032908	Sgpp2	8.9983	9.0841	8.8368	9.4891	9.1273	9.1915	8.9165	8.9869	9.0604	9.0466	8.9966	9.3365	8.7613	9.1133	9.3736	9.3232	6.7904	7.4442	6.6948	7.1545	6.8945	7.3959	7.6082	6.9077	7.7746	7.7752	6.8227	7.6009	7.3296	7.1872	7.7192	8.5528	8.0542	7.7322	7.8604	7.7896	7.7559	7.0237	7.4735	7.5139	7.8188	7.4278	8.1467	7.653	7.7303
	795	330324			6.0997	5	5.491	5.9452	4.6697	5.7298	5.4464	5.9755	5.5336	5.5408	5.1916	5.614	5.429	5.3331	5.2618	5.7954	6.6402	6.3407	6.2211	6.5897	6.2633	5.7265	7.0159	4.4276	6.6207	6.6056	5.9779	6.6749	6.6014	6.3044	6.1256	5.5442	5.0292	5.1738	4.7295	5.6566	5.4705	4.9589	5.5916	5.3317	5.1915	5.3342	5.4295	5.3218	5.3163
	796	64177	ENSMUSG00000029868	Trpv6	4.9499	5.433	5.4082	2.8726	5.1516	5.1156	5.1572	4.785	4.7918	5.4501	5.0968	5.2978	4.475	4.5854	4.7501	5.4723	5.0323	4.8915	4.9296	4.6259	4.4518	5.6201	4.8017	4.4992	5.6576	4.7354	4.9337	4.9115	4.8728	5.1822	4.678	6.0297	6.216	6.308	5.9959	6.0543	5.9776	5.8369	6.2993	6.2336	6.4851	5.9218	6.1052	5.9781	6.2562
	797	70536	ENSMUSG00000024084	Qpct	9.2577	9.2683	9.5441	9.1747	9.2218	9.5394	9.2834	9.2805	9.3269	9.3492	9.3628	9.6129	9.5162	9.4584	9.4438	9.6945	7.7641	7.0135	7.6933	7.8356	7.9317	7.9801	7.735	7.5202	7.4303	8.2432	7.8987	7.4755	7.5637	7.7238	8.0057	7.6406	7.5914	7.7458	7.6699	7.7109	7.5413	7.724	7.7022	7.6031	7.7232	7.6321	7.4328	7.73	7.4513
	798	13840	ENSMUSG00000055540	Epha6	7.2442	7.9289	7.8015	7.9847	7.9588	7.4234	8.0944	7.9839	8.0847	7.7787	7.8496	8.1954	7.929	8.169	8.1304	7.9689	9.3555	9.3849	8.9751	8.9948	9.2785	8.7166	9.4569	9.4498	8.8041	8.6847	9.7104	8.8689	8.8404	9.1572	8.7231	10.1355	10.3587	10.3297	10.2815	10.4865	10.273	10.0326	10.5025	10.3043	9.7619	10.1937	10.2423	10.03	10.2907
	799	20840	ENSMUSG00000032502	Stac	6.6563	6.7269	6.9395	7.0859	6.5483	5.9366	6.6107	6.6554	6.0211	6.5337	6.4543	6.529	6.4916	6.4672	6.6544	6.5839	5.9413	5.1084	4.518	5.4526	4.885	5.4647	6.2129	5.16	5.9899	5.8284	5.5021	5.4102	4.5993	5.0062	5.819	6.7784	6.4381	5.9348	5.8284	6.5579	6.7726	6.2855	6.6861	6.3527	6.65	6.4259	6.5193	6.4982	6.5714
	800	216976	ENSMUSG00000037593	BC030499	6.7623	6.0841	5.7595	5.8924	6.0128	6.5851	6.0739	6.76	6.2308	5.873	5.6245	6.1591	6.1648	5.705	5.967	6.6654	6.4274	6.5529	6.4254	5.1632	5.9422	6.5213	5.2035	6.601	6.0225	6.2598	6.1969	6.2014	6.6603	6.6719	6.7805	5.4882	5.9684	5.8114	5.1948	5.7016	5.2333	4.635	5.8765	5.5063	5.6726	5.1404	5.2958	5.214	5.6947
	801	320311	ENSMUSG00000047496	Rnf152	9.2522	9.0418	9.2572	9.8563	8.9692	9.2214	9.2925	9.0886	9.5648	9.455	9.5422	9.671	9.613	9.6999	9.6815	9.6376	8.5176	8.6855	8.4593	8.5805	8.5388	8.1299	8.6747	8.9111	8.6033	8.448	8.5654	8.1158	8.3298	8.1031	7.8916	8.4575	6.8902	6.7987	6.7247	7.3959	7.5238	7.2967	6.8791	6.9294	7.0809	6.6729	7.8091	7.4262	6.8205
	802	241556	ENSMUSG00000027217	Tspan18	7.9254	8.0251	7.8176	8.1287	8.2192	8.2888	7.8188	8.2262	7.9129	8.0651	7.8569	8.0888	7.952	7.9955	7.6255	7.852	6.8256	6.6712	6.9949	6.7688	6.1895	6.0608	5.9938	5.3656	6.2321	7.0163	6.3085	6.989	6.0605	6.7716	6.7114	9.2447	9.3857	9.71	9.5473	9.8422	9.6458	8.9235	9.807	9.4317	8.8252	9.6257	8.8891	9.2656	9.7033
	803	66793			7.6331	7.3491	7.718	7.9201	7.3598	7.5703	7.3199	7.8482	7.7295	7.3538	7.6386	7.7551	7.9671	8.0039	7.9564	7.8345	6.7724	6.94	6.9515	7.0017	6.5846	7.459	5.4203	7.4497	5.9899	6.2775	7.2578	6.7927	6.6014	7.0578	6.8971	6.2976	6.5626	6.7856	6.5323	6.698	6.7224	6.2661	6.6562	6.525	6.8135	6.6488	6.9336	6.776	6.2277
	804	100042056			5.8725	4.66	4.1871	3.5553	4.0547	5.4211	4.6509	2.2755	3.9864	4.6597	3.9657	3.9302	3.975	3.5122	4.2686	3.6273	7.0801	6.7806	6.7295	6.1787	5.6062	6.2629	6.5482	6.2735	7.4303	6.7002	7.0961	6.6749	6.6164	6.8388	6.3052	7.8662	7.6903	7.5893	7.3849	7.4186	8.0604	7.5504	8.0389	7.858	7.7955	7.9654	7.6193	7.2554	8.1725
	805	209743	ENSMUSG00000039313	AF529169	7.7613	8.0917	8.2568	8.5934	8.3309	8.1606	8.2463	8.5189	8.6166	8.5613	8.1386	8.4485	8.6811	8.2832	8.1304	8.6221	5.8756	6.369	5.6979	5.8609	6.0848	6.114	5.3691	2	5.6155	6.2598	6.0758	5.9636	5.6305	6.2659	6.4649	5.8187	5.1131	5.3259	4.7295	5.3704	5.4211	4.5732	4.8713	5.2845	5.1432	4.4428	5.1867	5.0565	4.9134
	806	68553	ENSMUSG00000032572	Col6a4	6.542	5.5753	5.2587	5.6272	5.5123	5.6141	5.1028	5.2354	5.8411	5.0165	5.2806	4.8924	6.056	6.0658	4.4476	4.9291	6.7724	3.14	6.8128	6.1467	6.5258	7.7044	5.0816	6.6171	6.7818	6.474	7.1718	7.8151	5.475	5.8101	7.4059	5.6755	5.8099	4.0033	5.4209	6.4995	5.9604	6.1649	6.1786	6.0483	5.9787	7.2708	6.3609	5.531	7.4817
	807	12023	ENSMUSG00000032033	Barx2	5.2988	6.0601	6.1305	5.0359	6.2937	6.3878	6.0739	6.2394	5.8831	5.7643	5.9569	6.1263	6.6497	6.1283	5.907	6.1182	5.6188	6.0575	6.4671	6.6133	7.0416	6.6709	6.4775	5.6116	6.2321	6.0082	6.2256	5.9636	6.9235	6.2659	6.9934	4.2563	4.9093	5.1332	4.8116	4.9397	5.1447	5.1404	4.9223	5.3774	5.0931	4.264	4.4671	4.8559	4.5026
	808	12351	ENSMUSG00000000805	Car4	7.0736	7.4263	6.8586	7.177	6.4683	7.3886	6.5306	7.1673	7.0048	6.5337	6.7318	6.9782	6.8585	6.911	7.3384	7.3834	8.1448	8.7078	8.6479	8.6335	8.5388	8.9134	8.4712	9.087	8.4913	8.2297	8.6473	8.8062	8.8996	8.966	8.5636	9.3168	9.0975	9.2758	9.4481	9.1665	9.2092	9.1038	9.3822	9.2286	8.8059	9.3228	9.1217	9.146	9.4573
	809	76487	ENSMUSG00000050423	Ppp1r3g	4.8763	5.1891	4.3732	6.2483	6.3394	3.6062	5.8611	5.7684	5.6598	6.0222	6.1582	5.3556	5.2919	5.3063	6.0799	5.3297	8.2393	7.9541	7.5743	8.4355	8.3427	7.8131	8.0836	7.8767	8.2092	8.2699	7.6135	8.1974	8.2067	8.278	8.1167	7.8044	7.4319	7.3352	7.8213	7.56	7.7257	7.2677	7.4905	7.858	7.8188	7.8748	7.4168	7.3218	7.4635
	810	239133	ENSMUSG00000048281	Dleu7	8.2251	7.861	7.7797	8.5169	7.7207	7.7455	7.7408	7.8949	8.0937	7.7834	8.2419	8.1954	7.8416	8.1275	7.9785	7.9446	6.9264	6.7378	7.0914	6.9836	6.2871	7.1246	6.8391	6.8125	7.0582	7.4095	7.2717	7.1491	7.0166	6.7989	6.7805	6.1963	6.4596	6.6041	6.6597	6.5248	6.7427	6.3422	6.1994	7.0751	7.0285	6.2123	6.2019	6.8971	6.3647
	811	106369	ENSMUSG00000022773	Ypel1	7.35	7.4263	7.3328	6.9373	7.0927	7.7591	7.156	7.0253	7.2491	7.0865	6.9645	7.3909	7.7485	7.4527	7.4993	7.3468	9.8505	9.6925	9.7961	9.7882	9.68	9.6342	9.5859	9.9133	9.2485	9.569	9.6744	9.4121	9.7853	9.7405	9.8002	8.9188	9.0767	9.0488	9.1218	9.0951	9.1779	9.2318	8.9129	9.1186	9.1346	9.0374	8.6498	9.1654	9.099
	812	72925	ENSMUSG00000036469	March1	9.0557	9.0751	9.3019	9.2736	9.2187	9.2165	9.0625	9.1604	9.381	9.1849	9.3215	9.4926	9.5416	9.4043	9.4385	9.4917	9.3343	9.1401	9.592	9.2347	9.1643	9.3113	9.4752	9.4964	8.8228	8.9359	9.4644	9.2971	9.3185	9.2856	9.1435	9.3128	9.4367	9.6355	9.4861	9.4602	9.3397	9.7142	9.4619	9.4424	9.2871	9.3361	9.2982	9.5431	9.4434
	813	100039239			7.0318	6.5826	5.8034	6.3498	6.1727	6.6155	5.9562	7.3717	6.3702	6.307	5.9569	6.7388	6.4492	6.2596	6.3956	6.5628	7.2058	7.0835	7.1179	6.8704	6.7306	6.6886	7.0969	6.6646	6.3134	7.2841	5.5483	6.76	6.6889	6.4831	6.6536	9.7776	10.2245	9.7609	9.9779	10.0533	9.9612	9.3541	10.0599	9.9166	10.0047	9.714	9.9331	9.7805	9.7603
	814	72585	ENSMUSG00000026344	Lypd1	8.4027	7.8953	7.752	7.8595	8.0441	7.9855	8.1356	7.7613	7.8666	7.6674	7.8569	7.9076	7.8084	7.9616	7.6255	7.6467	10.2972	9.9031	10.383	9.9823	10.0171	9.7183	9.9374	9.548	9.6306	10.1021	10.3091	9.4587	9.8997	10.0789	9.4686	7.9619	8.1761	8.4264	8.6219	8.4376	8.4164	8.1142	8.4266	8.44	8.3101	8.4287	8.1271	8.2592	8.3381
	815	383348	ENSMUSG00000051401	Kctd16	7.0233	6.0601	6.8271	6.2271	6.0128	6.7855	6.8441	6.4345	6.8009	6.5985	6.5289	6.6947	6.9372	6.8098	7.1443	6.4058	7.5279	8.2257	8.022	7.8752	8.2428	7.837	8.0515	7.8427	7.3034	7.0267	8.0348	7.4032	8.0337	7.8267	7.8013	7.0248	7.5914	7.4306	7.5435	7.6962	7.1966	7.6953	7.6727	7.7229	7.2617	7.2145	7.7206	7.7462	7.6141
	816	433938	ENSMUSG00000070576	Mn1	8.7633	8.6047	8.6482	8.3209	8.7625	8.725	8.4452	8.4406	8.4309	8.4891	8.4765	8.139	8.3068	8.3633	8.3601	8.3352	9.8863	10.11	9.8757	10.2843	10.1381	9.6568	9.9955	9.6867	10.3455	10.1448	10.1077	9.8988	10.2326	10.0776	9.9916	9.193	9.2049	9.149	9.2888	9.3238	9.3968	9.1147	9.2462	9.4043	9.339	9.2345	9.0141	9.2923	9.1885
	817	14725	ENSMUSG00000027070	Lrp2	5.7334	6.7115	6.1813	5.5945	6.7135	6.5851	6.6866	6.1047	6.5372	7.079	6.6507	6.0584	6.6118	6.503	6.2096	6.3077	3.9014	3.5881	3.9398	5.1632	5.1151	4.2525	3.5192	4.9715	3.4934	5.7292	2.453	5.2308	3.3322	3.8502	4.9895	4.9798	5.1923	5.4634	5.768	5.2742	5.1447	5.1824	5.4248	5.3774	5.3277	5.0695	5.8188	5.5159	5.8707
	818	12950	ENSMUSG00000021613	Hapln1	6.4812	6.1538	5.9858	5.2187	5.8953	5.984	6.4674	6.7822	6.8334	6.2273	6.7784	6.529	6.9372	6.6379	6.9795	6.9838	8.9354	8.8551	8.8585	8.843	9.4197	9.1549	9.0446	9.155	8.5816	8.9248	8.7046	8.9253	8.7785	8.7664	8.938	9.1842	9.5133	9.5377	9.2995	9.3477	9.0167	9.5453	9.129	9.2866	9.207	9.2017	9.541	9.2023	9.1166
	819	20969	ENSMUSG00000020592	Sdc1	5.9282	4.5946	4.2519	3.4125	4.0547	4.4855	4.7248	4.5971	4.7918	4.6597	4.4219	3.5887	4.8456	4.4935	4.2686	4.3726	2	4.2053	3.8162	4.7161	4.6846	4.3445	4.454	5.021	3.8245	2.5574	3.5082	4.5779	5.4418	3.8502	4.28	4.6629	3.7833	3.8105	3.8175	2.7375	4.4047	3.7421	3.8608	4.2887	3.141	3.1812	4.2673	4.084	3.6961
	820	13193	ENSMUSG00000031285	Dcx	8.9654	8.4835	8.3034	8.4453	8.2732	8.6681	8.5404	8.4231	8.7216	8.4776	8.5589	8.9245	9.0507	8.6771	8.7018	8.6722	9.2065	9.1318	9.1063	8.7394	9.1481	9.3479	9.2742	9.1933	8.8366	9.0635	9.0759	9.025	9.0858	8.9869	9.026	7.7929	8.569	8.4922	8.02	7.8774	7.8617	8.3211	7.992	8.3626	8.2138	7.9005	7.9437	8.3362	7.8044
	821	73569			5.9641	6.1538	6.7949	6.4808	4.9892	7.1807	5.8279	6.069	6.1122	6.4068	5.4436	5.8732	6.4055	6.1734	6.3056	6.3819	6.9101	4.5399	7.0509	6.5163	5.9422	6.9598	5.9245	3.4019	4.5161	6.4273	5.2457	6.8714	5.874	7.0235	6.7939	4.7126	5.3845	6.6766	6.7353	4.0248	6.2983	6.8521	4.7065	6.4628	4.5413	4.264	3.4162	6.9316	5.7951
	822	640524	ENSMUSG00000074899	Sptbn5	6.9444	6.4595	6.8164	6.8429	6.5089	6.7585	6.1564	6.2554	6.4837	6.2677	6.4733	6.3128	6.1907	6.341	6.4385	6.7044	6.8429	6.0575	5.5111	5.7372	5.1674	5.9183	4.6383	3.5441	6.3134	4.515	5.5021	5.905	5.015	6.7578	5.6812	4.8073	4.5569	4.9107	3.9683	5.0368	4.4547	4.8588	4.7065	5.3774	5.2837	4.9164	4.1941	4.903	5.0169
	823	70415	ENSMUSG00000031112	Stk26	6.2236	7.2464	6.959	7.2732	7.0927	6.9615	6.8441	6.76	6.9663	6.9275	6.9374	7.3631	7.1769	7.1252	7.4049	7.4766	6.2313	5.9112	6.6043	6.0108	5.9718	6.2863	5.5175	5.6116	5.7771	5.8284	6.1676	5.6433	5.4418	5.9626	5.8957	6.2309	6.8171	6.935	6.7665	6.3564	6.3389	6.7157	6.3926	6.6419	6.65	6.7199	6.6206	7.0035	6.4657
	824	24014	ENSMUSG00000066800	Rnasel	6.7926	7.3089	7.5607	7.9002	6.7135	7.2789	7.2837	7.1841	7.5125	7.2898	7.3092	7.5353	7.3249	7.2071	7.2078	7.2708	7.9827	7.9066	7.5356	7.5836	7.2375	7.3411	7.7749	7.4131	7.1932	7.098	7.6458	7.2932	7.6241	7.6804	7.6691	6.7548	7.4373	7.7659	7.4884	7.2365	7.0001	7.2381	7.5403	7.3856	6.9179	7.1473	7.4408	7.2233	7.4012
	825	18508	ENSMUSG00000027168	Pax6	7.0653	7.225	6.9878	7.5196	7.5171	7.0081	6.7762	7.2252	7.2491	7.4564	7.5249	7.3202	6.9825	7.1329	7.7587	7.3591	7.5279	7.897	8.0701	7.9138	7.8381	7.7302	8.4281	7.5542	7.6755	8.4674	7.7778	7.9589	7.8623	7.7864	7.7332	8.6163	7.606	7.6337	7.6589	7.3256	7.4394	7.636	7.4124	7.3286	7.7797	7.1212	7.6123	7.3476	7.5751
	826	232400	ENSMUSG00000047228	A2ml1	6.0834	6.5993	6.5847	5.7805	6.846	6.5223	6.4013	6.76	6.5762	6.3825	6.7936	6.5036	6.8257	6.5494	6.5796	6.7977	7.1923	6.716	7.0371	7.2176	7.1623	6.706	7.1883	6.4999	6.4151	6.5043	7.2854	6.6212	7.0827	6.7438	7.1268	6.7548	6.6494	7.2897	6.445	6.8459	6.7527	6.7299	6.6103	7.0041	6.5234	6.8419	6.3609	6.8559	6.7013
	827	66183	ENSMUSG00000043461	Sptssb	4.9854	5.1891	5.4364	5.1752	5.5516	5.0279	5.5312	5.329	5.8623	5.8904	6.5998	6.4516	6.2659	6.1585	6.6175	5.6825	2	4.9675	4.6686	5.3991	4.7546	3.3611	5.5638	5.5454	5.1086	4.7354	3.8409	4.5779	4.8728	4.1332	5.206	5.5165	5.4504	5.5276	3.3526	4.9397	4.2992	3.951	4.6471	4.3813	4.2979	4.7452	5.1484	4.5945	4.5947
	828	229722	ENSMUSG00000040412	5330417C22Rik	9.2431	9.591	9.461	9.5308	9.3722	9.7005	9.4722	9.4039	9.4297	9.6279	9.1725	9.2325	9.5863	9.4106	9.5108	9.285	9.0138	8.9978	8.8467	8.9812	8.6253	8.7548	9.1278	8.6412	9.3643	8.7462	8.8955	9.1215	8.8435	9.0335	9.0346	8.6422	8.7739	9.0212	8.7705	8.9748	8.7968	8.8699	8.9223	8.9284	8.7824	8.6268	8.6903	8.6368	8.789
	829	15564	ENSMUSG00000050534	Htr5b	4.4385	5.0976	4.9429	4.2863	4.4374	5.7844	5.7237	5.1353	5.7533	4.488	5.2806	4.7273	5.1926	5.1036	3.9501	5.0553	5.7711	5.9492	6.0669	6.0804	5.6062	4.5126	6.123	5.7934	6.1161	5.8985	5.6787	6.2256	5.4078	4.2165	5.9686	6.9949	6.8981	6.7987	6.7458	6.7774	7.1818	6.9033	6.7439	7.2933	7.3281	7.2865	6.6483	7.0035	7.2107
	830	110083	ENSMUSG00000021879	Dnah12	7.3016	6.9782	6.4669	7.2628	6.8301	6.812	7.401	6.9779	7.4991	7.0328	6.7318	7.0323	7.4908	6.8287	6.9795	6.9354	4.6157	5.1084	5.626	5.4526	6.0009	5.195	2.8045	7.081	4.6049	5.0133	4.2293	4.8507	4.4735	5.4114	5.9204	4.6114	5.3154	6.194	4.3444	5.7878	5.3436	6.7157	5.8504	5.5063	5.2837	4.9164	5.843	5.956	5.3431
	831	74100	ENSMUSG00000032503	Arpp21	9.8771	9.7866	9.9401	9.4958	9.9076	9.7765	9.7136	10.261	9.8439	9.7916	9.8653	9.8549	9.9131	9.9112	9.8991	9.8593	13.2568	13.4454	12.8725	13.1011	13.2424	12.6415	13.4108	13.278	13.0662	12.8648	13.2871	13.0367	13.1084	13.1325	12.9517	11.1773	11.3035	11.5002	11.4257	11.2402	11.2416	11.7197	11.1689	11.3291	11.4501	11.186	11.2071	11.3624	11.1591
	832	353326	ENSMUSG00000085925	Rtl1	7.5585	7.7677	7.3624	7.177	7.7548	7.097	7.8928	7.5378	7.6405	7.8646	7.3406	7.3056	7.4376	7.3581	6.8581	7.4073	6.7359	5.6596	6.4254	5.6935	4.7546	6.7903	5.316	6.4823	6.2597	6.3953	5.4543	6.6393	5.5703	6.7297	6.9699	4.2563	4.7438	3.8105	4.9985	4.602	5.3699	5.2232	3.367	4.628	5.4118	4.5508	5.4611	5.2326	4.6386
	833	67122	ENSMUSG00000078202	Nrarp	9.7921	9.783	9.5473	9.3269	9.6824	9.4579	9.7714	9.2568	9.7001	9.3848	9.7098	9.6189	9.5691	9.6342	9.5333	9.7446	9.4685	9.0203	9.893	9.4827	9.7001	9.3056	9.4903	9.3492	9.9974	9.8229	9.371	9.4147	9.6913	9.7049	9.8266	8.5391	9.1447	8.5968	8.9005	8.2146	8.5518	8.7246	8.2779	9.0742	8.8999	8.7223	8.6836	8.8409	8.5656
	834	24059			4.4385	4.7824	5.0919	4.8266	5.2506	4.4855	4.4034	2.8811	4.2008	5.4025	5.047	3.9302	4.3879	4.9391	5.0001	4.1642	6.0346	6.1582	4.8686	6.1787	5.7154	6.1654	6.123	6.353	5.4335	5.8755	5.9087	5.5314	5.1445	4.9095	5.6812	6.5374	7.1438	6.9815	7.0463	7.316	6.9399	6.9158	7.0378	6.4197	6.1598	7.1212	6.967	7.0874	7.3022
	835	384214	ENSMUSG00000033805	Ephx4	5.5324	6.2204	6.3386	6.0694	5.8005	6.4566	6.3321	6.3176	6.4837	6.3702	6.5106	6.5538	6.5924	6.5494	7.1313	6.2295	9.259	9.3744	8.9422	9.1922	9.0262	8.5527	9.124	9.0724	8.8548	8.617	9.1713	8.8689	9.0226	9.0506	9.235	9.1864	9.2929	9.5102	9.3364	9.3118	9.2611	9.1627	9.1875	9.2836	9.4575	9.2566	9.1774	9.0835	9.0733
	836	381522	ENSMUSG00000035539	Ccdc180	6.3514	7.0162	7.2638	7.0135	7.0521	7.523	7.499	6.2394	6.9565	7.1882	6.3757	7.1014	7.2528	6.4055	6.5407	6.9679	6.0041	4.8915	4.9296	3.7602	5.7839	4.5126	4.8769	5.7647	3.0631	5.3162	2.453	4.1432	4.7695	4.9095	4.9895	5.1699	4.8777	5.4303	4.4507	4.9646	4.639	5.4465	5.6831	4.9025	5.7063	4.3261	5.4295	5.214	5.6737
	837	93835	ENSMUSG00000021278	Amn	6.7103	7.0162	6.5721	6.5676	7.0244	6.2	6.4457	6.6793	6.6988	6.9275	6.6507	6.8025	6.2163	6.4428	6.8098	7.0611	5.9413	6.5773	5.8316	6.5656	6.4645	5.7265	6.0918	5.4762	6.5775	6.4273	6.7455	6.2494	6.4921	6.7011	6.6087	6.6179	5.9533	6.3965	5.7263	6.1222	5.8149	6.0561	5.9021	6.6419	6.3636	5.9218	5.8668	6.536	5.609
	838	65079	ENSMUSG00000043811	Rtn4r	7.7303	7.84	6.784	6.6654	7.7716	7.353	6.9861	7.2887	7.1494	7.415	6.9778	6.8231	6.7404	6.9198	7.7502	7.2312	10.2607	10.1267	9.69	10.2145	9.6274	9.2854	9.9483	9.7813	10.1963	9.56	10.3586	10.201	10.2955	10.1848	9.9945	10.2703	10.1144	10.1642	10.3518	10.3277	10.5279	10.1417	10.4382	10.2238	10.2656	10.5177	10.0441	10.3674	10.4753
	839	192212	ENSMUSG00000027376	Prom2	6.0335	4.0286	3.9733	4.3659	4.9307	4.4855	4.3104	4.3215	3.9073	4.6597	4.4981	4.2061	2.9834	4.4452	4.17	3.9206	3.6096	3.7688	3.5316	2.8446	4.1741	2.957	2	3.0669	2.7876	4.2549	3.075	2.9501	3.0086	3.2033	3.6121	4.2563	3.9747	2.5864	2.8293	3.927	3.6109	4.2167	3.5072	2.7205	3.6366	4.3261	4.4671	3.604	3.6105
	840	74165	ENSMUSG00000050503	Fbxl22	2	3.4223	3.1727	3.4125	4.519	4.4855	3.5754	5.1694	3.0413	3.2741	3.2945	3.5887	3.7136	2.4547	4.0642	2	4.3515	3.3814	4.5952	4.0646	4.7546	4.3445	5.0166	3.0669	4.9138	2.9585	3.3078	4.7207	4.4062	3.9508	4.678	3.078	3.7134	3.0022	4.3444	4.4692	3.9957	3.6251	3.6349	3.3892	4.4646	3.4277	2.5625	3.7136	4.4543
	841	81905	ENSMUSG00000053395	Cacng8	9.8021	9.6764	9.4437	9.2865	9.8653	9.2115	9.2773	9.384	9.1534	9.4637	9.1041	9.3257	9.202	9.1977	9.2096	9.3294	10.7233	10.42	10.6291	10.7046	10.0505	10.1028	10.1758	9.9679	10.91	10.6674	10.7384	10.5097	10.7712	10.8235	10.4241	11.0794	11.1491	11.1253	11.2728	11.0988	11.2859	10.8646	11.2435	11.2276	11.1607	11.3691	11.0807	11.0368	11.2745
	842	16515	ENSMUSG00000042529	Kcnj12	7.948	8.1891	8.1117	7.0976	8.4605	8.4991	7.8766	7.9152	8.0981	8.1719	8.059	7.9172	7.9057	8.169	8.5036	8.1425	7.8775	7.897	7.8114	8.2742	7.4527	7.4895	8.1833	7.5458	8.0758	8.0359	7.8533	7.9874	7.9594	7.4929	7.9102	7.8384	6.7045	6.6624	7.1447	7.0222	6.9311	7.1349	7.0145	6.8506	7.1063	6.6729	6.7918	6.5945	6.8205
	843	73472	ENSMUSG00000029155	Spata18	6.2087	6.0841	6.5205	6.9109	6.6241	6.6744	6.4888	6.1736	6.5633	6.0378	5.6581	6.3977	6.4916	6.4792	6.1332	5.6825	5.0323	4.0739	2.9602	5.2259	4.4518	4.1543	2	4.9715	2	5.2817	3.075	3.3524	3.9195	3.9508	5.4963	4.8961	4.7785	3.8105	4.2296	5.1496	5.1447	4.9589	4.9223	4.8386	5.3703	4.4978	6.2204	4.8073	4.802
	844	59091	ENSMUSG00000017817	Jph2	6.4047	6.8719	6.8377	7.166	6.7308	7.0752	6.284	6.9089	6.6988	6.9021	6.7318	6.8025	6.5728	6.8567	6.5603	7.2042	5.8416	5.7485	4.8686	5.6019	6.0573	5.8572	5.0166	6.2938	6.7432	5.21	5.5931	5.3674	6.1455	6.206	5.5606	4.4447	3.9747	4.7586	4.2296	3.7087	3.5198	4.0451	3.9617	4.5504	4.4646	3.9056	3.9489	3.4222	3.9953
	845	77630	ENSMUSG00000035456	Prdm8	6.9975	7.0773	6.5205	6.3884	7.5945	7.8514	7.001	6.9779	6.8962	6.7956	6.8673	7.0499	6.9062	7.1852	7.0083	6.9517	9.8224	9.1401	9.3234	9.5729	9.3676	9.2079	9.6649	9.4899	9.5237	9.4553	9.8939	9.3557	9.9179	9.6777	9.4088	10.7176	10.7971	10.9966	10.9599	10.82	10.7587	10.7816	10.8863	10.8206	10.6393	11.1025	10.77	10.5787	10.9226
	846	100861633			4.9854	4.5261	4.8623	4.8818	4.6697	4.8347	4.3104	4.99	4.6038	4.5764	5.2806	4.8122	5.1926	5.3063	4.9416	5.1145	6.8081	6.5027	6.9949	6.7042	6.999	7.1375	7.0489	7.2146	6.1161	6.563	5.9087	6.5076	5.874	6.4491	6.5465	6.5511	6.6018	7.0377	7.0799	6.8392	6.6384	7.2079	6.5947	6.7843	6.798	6.7315	6.8042	6.8855	6.9394
	847	16019			7.948	7.5522	7.377	7.001	7.7464	7.2208	7.6394	7.6569	7.3348	7.5412	7.2108	7.5228	7.055	7.0943	7.3039	7.5101	7.1373	6.7806	6.7123	7.1054	6.9551	6.7738	6.4775	6.6646	7.2075	7.2488	5.0667	6.7434	7.4176	6.7297	7.0616	7.8158	7.5668	7.4961	7.5253	7.8839	7.3431	7.688	7.9372	7.8418	7.6032	7.8696	8.2085	7.1076	7.6359
	848	18491	ENSMUSG00000028370	Pappa	5.4333	5.3951	5.7816	7.2418	6.0128	6.1593	6.2088	5.8962	6.2469	6.2809	6.1815	6.2533	6.314	6.3801	5.8445	5.9976	4.445	4.9675	4.6686	3.3739	4.4518	4.9824	4.454	4.8671	3.8245	4.6294	5.1288	5.2778	5.1026	4.3698	4.7895	4.5024	4.3877	4.7586	3.9683	4.8085	5.3168	5.2232	4.9715	4.9637	5.1432	4.5508	5.0271	5.0772	4.8401
	849	93708	ENSMUSG00000102543	Pcdhgc5	8.5813	8.3111	8.0584	8.8225	8.3809	8.5072	8.4008	8.0858	8.3169	8.3919	8.2909	8.3525	8.3876	8.6587	8.1882	8.1496	10.4879	10.9871	10.5729	11.1057	10.3619	9.9934	10.9927	10.2558	10.8781	10.5398	11.2925	10.6931	10.9742	10.6879	10.6496	10.5524	10.6299	10.558	10.6238	10.7094	10.7693	10.4369	10.8181	10.7223	10.4817	10.6503	10.5691	10.5383	10.6737
	850	74051	ENSMUSG00000015653	Steap2	9.3267	9.168	9.0835	9.3118	9.1142	9.2165	9.2494	9.5808	9.5072	9.4166	9.3371	9.4667	9.5239	9.5849	9.582	9.5357	7.5596	8.0269	8.2778	7.9607	8.3596	8.3004	8.4651	8.9658	8.4318	8.4085	8.4963	8.135	8.2931	7.9289	8.0733	8.8974	8.2272	8.1076	7.4246	8.3647	9.2434	8.1358	7.6426	7.7405	7.5485	7.5036	9.5111	8.2433	7.5523
	851	104885	ENSMUSG00000054013	Tmem179	12.0717	12.0669	12.0195	11.6669	12.1846	11.9281	12.0227	11.6825	11.6997	11.9427	11.8625	11.7495	11.727	11.7301	11.6935	11.7617	11.488	11.3922	11.568	11.6178	11.3263	11.5639	11.3077	11.3322	11.7139	11.7227	11.628	11.627	11.5775	11.6552	11.5902	11.1017	11.0874	11.0295	11.2832	11.219	11.3575	11.0095	11.2903	11.1801	11.3037	11.3155	10.9484	11.2452	11.3801
	852	11695	ENSMUSG00000040310	Alx4	2	3.0841	3.0323	3.5553	2	3.6062	4.1044	3.5331	3.1825	3.4714	2.661	3.382	3.2034	3.987	2.9669	3.6273	3.9014	6.528	4.3497	6.491	5.8809	6.2391	5.4697	6.353	5.9224	6.5773	4.4402	5.7471	6.3201	5.0969	4.7348	4.5024	4.9093	5.1332	5.1948	5.478	5.1139	4.9097	5.2362	4.2887	4.9874	4.7899	5.843	5.2326	5.3163
	853	67077	ENSMUSG00000050623	Catsperz	3.7253	4.84	3.8109	3.9145	3.9408	5.6731	4.2111	3.4241	4.5526	4.7763	4.7051	4.5407	4.2952	4.4452	4.3609	5.3297	5.7345	5.7909	6.0938	5.8609	5.6435	5.948	6.2975	5.4034	5.5274	5.383	6.5994	5.9346	5.7438	5.8101	6.4981	6.0874	5.6319	5.8621	5.6833	6.2185	6.0926	5.1824	6.047	6.1571	5.7392	6.2608	6.3441	5.9781	6.2277
	854	14632	ENSMUSG00000025407	Gli1	8.2689	8.4189	7.2716	7.1548	7.527	7.7994	7.6006	8.045	7.7179	7.9036	7.835	7.6202	7.9968	7.5066	7.9712	8.0162	6.6001	5.8321	6.6772	6.5163	6.8311	6.5014	5.1439	6.1895	7.0738	6.8727	5.8728	6.2256	6.8367	6.9279	7.1268	5.9899	5.1923	4.6475	4.5497	4.9646	5.0502	5.9385	5.3146	5.8681	5.5665	5.4779	5.2958	5.7654	4.9832
	855	17926	ENSMUSG00000026697	Myoc	8.0645	7.7377	7.8069	8.5169	8.2673	8.0425	8.9361	9.0083	7.9027	8.2513	8.1796	7.1348	7.4804	7.8126	7.1953	7.6567	9.0252	9.6785	9.5171	9.8909	9.9158	9.7205	9.787	10.736	9.4685	10.7456	8.7596	10.0418	9.842	9.3071	9.7784	8.3594	7.9854	8.5893	7.9492	8.4152	8.1159	8.8075	9.0453	8.4876	8.1601	8.1441	8.2898	8.9087	8.4563
	856	241230	ENSMUSG00000003418	St8sia6	7.2295	6.4223	6.8271	5.8924	6.2937	7.1394	6.8106	5.1694	6.8226	6.7677	6.5469	7.1512	7.1105	6.7415	7.1048	6.9679	4.1439	3.7688	5.626	3.7602	5.5284	5.7603	3.8532	2.3491	5.2802	4.9706	4.9337	4.4194	4.3357	4.751	4.893	6.2309	5.2178	6.0265	5.6614	5.9952	5.1139	5.6399	6.0238	5.0787	4.9874	5.6817	6.4423	5.6735	5.609
	857	320609	ENSMUSG00000039629	Strip2	8.776	8.3903	8.571	8.9985	8.6447	8.4065	8.5146	8.8115	9.035	8.7513	8.6535	8.6752	8.9287	8.847	8.8955	8.9038	8.1861	9.1604	8.3125	8.7447	9.0012	8.5234	9.1162	8.1897	9.3418	9.0887	8.7448	8.8535	8.8688	8.7279	8.402	10.14	9.5564	9.6874	9.5959	9.8803	10.2834	9.4539	9.949	9.5004	9.2361	9.7555	10.3921	9.7654	9.66
	858	217517	ENSMUSG00000046314	Stxbp6	9.1641	9.4223	9.2374	9.2343	9.1721	9.3031	9.0767	9.2844	9.5256	9.5261	9.6337	9.7751	9.5912	9.786	9.9163	9.7609	10.1915	9.8861	10.2785	10.2107	10.0312	10.43	9.9934	9.6459	9.6902	10.0453	10.1847	9.736	10.0912	9.9017	10.204	10.8843	11.1647	11.3274	10.9315	11.3019	10.5169	10.9711	11.2584	10.8533	10.9163	11.1179	10.916	10.686	11.0712
	859	212892	ENSMUSG00000039552	Rsph4a	7.8553	8.3313	8.4759	8.3008	8.5013	8.2212	8.3838	8.5189	8.553	8.4101	7.8128	8.5995	8.4905	8.5345	8.4781	8.2846	7.4734	7.26	7.7281	7.1545	7.3206	7.6149	6.8762	7.0093	6.9093	8.0411	7.5581	6.7266	7.3021	7.4157	7.6836	6.4953	6.4163	6.7457	6.5799	7.0103	7.2184	7.0467	6.8791	6.7325	7.2157	6.9641	7.5476	6.9429	6.9655
	860	12794	ENSMUSG00000024873	Cnih2	10.6693	10.6639	10.6175	10.2844	10.8681	10.5236	10.8016	10.4724	10.5183	10.4362	10.6841	10.314	10.4954	10.503	10.6103	10.5534	11.9968	11.3225	11.8297	11.7557	11.7654	11.7656	11.5432	11.5773	11.7133	12.0154	11.5298	11.5739	11.7544	11.8022	11.6376	12.4656	12.5213	12.4367	12.5718	12.3973	12.5627	12.4002	12.4406	12.5966	12.6696	12.6573	12.5406	12.4423	12.5505
	861	242259	ENSMUSG00000028360	Slc44a5	7.1301	7.2676	7.5543	7.2312	7.1706	7.5547	7.1955	7.5637	7.2084	7.0012	7.4501	7.3909	7.4158	7.7295	7.6531	7.499	8.6314	7.6193	8.0836	7.7096	7.5737	8.2237	8.198	7.9099	7.9027	7.3101	7.9598	7.6817	7.3476	8.0011	7.9102	9.105	9.3857	9.7152	9.6175	9.4776	9.5896	9.3074	9.4292	9.5209	8.8742	9.2645	8.946	9.2565	9.6825
	862	74264	ENSMUSG00000083695	Rnf138rt1	6.4936	6.4595	6.773	6.8976	7.1579	6.6452	6.3556	6.4896	6.5762	6.6706	6.5469	6.4516	6.4705	6.4551	6.7256	6.1469	4.1439	4.4368	4.2577	4.7161	4.365	4.9239	5.0166	4.4276	4.7676	4.6834	4.7079	4.5779	4.4062	4.1332	4.2015	3.5849	4.295	4.0033	4.2881	3.4515	4.9492	3.8503	3.2117	4.0836	4.2066	3.733	3.6533	3.1375	3.6961
	863	232201	ENSMUSG00000030047	Arhgap25	4.4887	5.2327	5.1943	5.3021	4.6697	4.6115	4.1044	4.785	4.6038	4.6186	4.2563	4.4376	4.5571	4.9038	3.9501	5.2788	5.578	5.8722	5.0442	5.286	5.3136	5.7265	5.4203	5.0688	5.1681	5.7796	4.7872	5.8439	6.2642	5.5137	6.3604	5.9899	5.7413	5.2134	5.7473	5.9709	5.7761	5.5783	5.8504	6.2085	5.9508	5.839	5.5809	5.8638	5.7153
	864	13992	ENSMUSG00000022332	Khdrbs3	10.4616	10.2728	10.3784	10.2388	10.3733	10.4262	10.2446	10.3325	10.1321	10.1177	10.4488	10.2715	10.3124	10.3921	10.4089	10.2092	10.8947	10.93	11.1893	11.1468	11.0152	11.182	11.0011	10.9784	10.9936	11.038	11.3085	11.0958	11.3054	11.1647	11.0828	11.6275	11.7618	11.7812	11.9321	11.7007	11.9261	11.6315	11.7086	11.8097	11.8092	11.8486	11.6198	11.6914	11.7418
	865	546611	ENSMUSG00000090799	Klhl33	6.9712	6.742	6.6462	5.3021	6.4476	6.6744	6.4888	7.0802	6.5762	6.7488	6.4543	6.6023	6.7578	6.538	6.6726	6.9354	5.5361	4.5399	4.988	4.8009	5.7501	5.1447	4.6383	5.2458	5.1681	3.7476	5.0667	5.1823	5.4418	4.3698	4.2015	6.6942	5.7058	5.9814	5.5699	6.1112	5.4211	5.7557	5.6831	5.3317	5.2837	5.7737	5.8188	5.6322	6.0921
	866	11540	ENSMUSG00000020178	Adora2a	5.5796	4.8953	5.8668	4.5132	5.3432	5.4211	4.573	2	4.8353	4.8842	3.7332	3.5887	4.475	4.1159	4.3609	4.7162	7.3213	8.2563	6.6228	5.9378	7.9165	7.1116	7.2462	6.123	8.4559	9.5903	5.9779	7.003	8.3298	7.6731	7.8978	5.3378	5.3618	5.5586	5.5699	5.1923	4.9492	4.7512	5.1099	5.2358	5.5294	5.4503	4.8476	4.9259	5.3431
	867	237806	ENSMUSG00000056752	Dnah9	7.6771	8.2273	7.9257	7.991	8.1048	7.962	8.3434	7.7445	8.2382	8.0728	7.5157	8.001	8.0187	7.94	7.7922	7.7988	7.6703	7.5714	7.612	7.4455	7.3547	7.8761	7.2603	7.7207	7.5244	7.3356	7.5238	7.4755	7.579	7.4929	7.6836	8.6645	8.8451	8.6732	8.4175	8.917	9.0976	8.6702	8.8874	8.6867	9.1591	8.7423	9.1168	8.8529	8.8416
	868	13838	ENSMUSG00000026235	Epha4	10.5337	10.0981	10.2083	10.6691	10.1351	10.2016	10.1556	10.1328	10.271	10.3392	10.3838	10.3481	10.4013	10.4536	10.644	10.5016	10.6304	10.8732	10.9315	10.9542	10.7776	10.5688	10.7454	10.8542	10.5396	10.6276	11.2149	10.4648	11.215	10.8812	10.7945	12.7169	12.8887	13.0063	12.8931	13.0394	12.7461	12.7975	13.0186	12.854	12.6813	13.0048	13.0217	12.7077	12.8838
	869	78806	ENSMUSG00000028801	Stpg1	4.2178	5.1441	4.1871	4.1123	3.9408	4.3474	5.2601	5.2354	5.1074	5.2762	4.8862	4.637	4.8456	5.3331	5.1105	4.8615	6.0935	6.4507	6.2691	6.5412	6.8945	6.4402	6.7618	6.3335	6.9939	6.6469	5.7983	6.946	6.3017	6.4662	6.8846	5.8853	6.1513	5.7045	6.3382	6.2492	6.1239	6.5491	6.4283	5.9307	6.4052	6.6119	6.1447	6.7948	6.7117
	870	15460	ENSMUSG00000022096	Hr	10.2493	10.2491	10.4335	10.3823	11.349	10.5863	10.8935	10.6431	10.8573	10.6639	10.9806	9.7909	10.5764	10.4228	9.866	10.4306	8.4738	8.4803	7.7021	8.3676	8.452	7.9141	8.4773	8.0595	9.0173	8.668	8.537	8.6676	8.3523	8.3209	8.2298	9.3368	8.2366	8.0758	7.8796	8.3075	8.342	8.1517	8.5813	8.1019	8.0063	8.1441	8.5246	8.0134	8.2202
	871	24117	ENSMUSG00000020218	Wif1	6.7209	7.1359	7.3177	7.2835	7.2683	7.6459	7.156	7.3346	7.3348	7.3349	7.5608	6.7603	7.2404	7.4093	7.1181	7.3345	2.7518	4.8915	3.5316	3.5799	4.8213	3.1732	4.8017	2.6299	3.6684	4.4543	5.2457	4.2412	4.5993	4.2165	4.5571	4.9798	4.295	3.5879	4.6866	4.2439	4.2434	4.806	4.8713	5.0223	3.4895	4.6512	4.4036	3.6599	3.9953
	872	245440			8.2435	8.4423	8.4894	8.6542	8.2965	8.1188	8.2712	8.2897	8.5168	8.3265	8.5722	8.6865	8.4957	8.3922	8.3823	8.6272	7.1513	5.9112	7.4341	6.7261	6.5653	6.706	7.1433	6.7106	6.7818	6.9627	6.8038	6.9605	6.758	7.0464	7.1993	6.7187	6.2534	6.3617	6.0644	6.0659	5.7562	6.9033	5.6227	6.2582	6.2077	6.0377	5.5222	6.4032	5.7951
	873	574403	ENSMUSG00000069911	Fam196b	8.9962	8.7318	8.8962	8.7976	8.5795	8.6314	8.9515	8.4752	8.8647	8.9485	8.7027	9.0867	8.8454	9.0217	8.6661	8.9451	6.3569	6.4507	6.9367	6.8103	6.9845	6.5792	6.9125	6.2321	6.4634	7.4949	6.1071	7.2468	6.1861	5.9865	6.5306	5.3692	5.3154	4.9107	5.1948	5.4606	5.1748	5.8369	4.9715	5.5063	5.3703	5.0695	5.4295	5.3044	4.9487
	874	19011	ENSMUSG00000022468	Endou	2.9716	3.926	4.8623	3.6852	5.3873	3.6062	4.6509	4.5971	4.7009	4.6597	3.8541	4.3264	4.5571	4.2899	5.5237	4.5546	7.7458	8.6045	7.1179	7.8752	7.6213	6.1904	8.5595	7.204	7.5692	7.098	7.698	8.1093	7.7242	7.6433	7.4574	4.6629	4.7083	5.1332	4.3985	4.9144	4.1249	5.7833	4.9223	4.9025	4.8734	4.9164	4.7991	4.7823	4.6812
	875	68810	ENSMUSG00000039103	Nexn	5.8145	5.433	5.9075	5.9962	5.1516	6.1593	5.3563	6.069	5.8831	5.9075	6.3348	6.0232	5.8433	5.6635	7.2324	5.7211	5.5361	5.9862	5.2965	5.7372	5.7154	5.6201	4.8017	5.6116	6.874	6.6195	5.0017	4.9699	6.3017	4.9095	5.5606	6.0297	5.5339	5.0038	4.963	5.0131	4.9492	4.8588	4.8184	4.4683	4.9874	5.3641	6.8407	4.536	4.8401
	876	14734	ENSMUSG00000055653	Gpc3	8.8209	8.2906	8.6178	8.1344	8.4708	8.773	8.6296	8.6874	8.4024	8.4487	8.1622	8.2344	8.5718	8.5687	8.1755	8.3101	6.6599	7.0489	7.3805	7.5099	6.9402	8.0772	6.7418	6.6801	7.0738	7.3186	6.7052	7.1107	6.9114	6.7716	7.1891	5.9068	5.7931	6.6766	6.5916	5.7597	6.6705	6.0786	5.5597	6.1037	6.006	5.505	5.9801	6.4593	5.3694
	877	18575	ENSMUSG00000004347	Pde1c	8.258	7.854	8.6926	8.157	8.2253	8.0648	8.2463	7.8482	8.1888	8.3297	8.3589	8.4942	8.4318	8.3238	8.2737	8.5595	8.2779	7.8475	7.3914	7.3073	8.1996	7.7044	7.8232	6.9337	7.8582	8.4978	7.2011	7.3383	7.3296	7.4069	7.7947	8.4684	7.7083	7.5968	7.418	7.5353	7.3096	7.7311	7.4213	7.4078	7.5392	6.9641	7.8153	7.4541	7.4635
	878	380698			4.7987	4.84	3.7223	3.4125	5.0454	4.6115	4.6509	5.1003	4.1328	4.0674	3.7332	4.5407	4.1962	4.7534	4.2686	4.4665	5.6969	7.0663	6.7801	5.7372	6.9551	6.1399	6.8762	6.3138	5.7383	7.2398	5.7197	6.6749	6.7979	6.9765	6.3604	6.8579	6.668	7.0595	7.1126	7.1306	6.7824	6.2265	7.149	7.2693	6.8888	6.8838	6.6755	6.7311	7.0573
	879	57295	ENSMUSG00000039662	Icmt	10.6166	10.6955	10.6989	10.7447	10.69	10.7006	10.6826	10.617	10.5842	10.6301	10.6343	10.5425	10.5148	10.5992	10.6791	10.4835	10.9645	10.7761	10.7576	10.831	10.7807	10.7073	10.8976	10.6745	10.859	10.7645	10.7717	10.9117	10.9195	10.752	10.7878	11.5449	10.6942	10.5211	10.7246	10.6396	10.7938	10.6219	10.7676	10.6368	10.6717	10.6692	10.7573	10.4934	10.7369
	880	13653	ENSMUSG00000038418	Egr1	8.9875	9.2994	8.6024	8.5082	8.84	8.9564	9.1184	8.3726	9.0943	9.394	8.8697	9.2131	9.2614	8.4606	9.4279	9.096	10.7916	11.1095	10.6843	11.0634	10.6999	10.4128	11.4722	10.4101	11.7288	10.8473	11.2068	11.2243	11.3379	10.9128	11.1233	10.4887	10.6999	10.3453	10.2833	10.4206	10.4622	10.4336	10.244	10.7572	10.7485	10.3653	10.7397	10.4633	10.5634
	881	22029	ENSMUSG00000026875	Traf1	6.6342	6.3841	6.6819	6.742	6.5089	6.6744	6.7935	6.2554	6.6141	6.8139	5.7851	6.529	5.9984	6.6803	5.7106	5.7587	5.4025	4.5399	4.9296	5.8208	4.8213	6.2391	4.9484	6.353	4.6049	5.21	3.8409	3.6666	5.6596	3.625	6.1256	3.9593	4.1437	4.3959	3.9683	4.9144	4.639	4.2954	4.0561	4.4683	4.2066	3.733	4.4671	4.9259	4.1245
	882	74318	ENSMUSG00000059325	Hopx	7.7916	7.8043	7.7407	7.411	7.7799	7.5857	7.5608	7.8163	7.6587	7.4966	7.6302	7.6666	7.3132	7.5922	7.5491	7.4879	9.7232	9.0114	9.8164	9.276	9.3423	9.7586	9.0446	9.8497	8.6247	9.6183	8.7694	9.2566	9.4621	9.1386	9.4066	10.4396	10.0108	9.9527	10.1257	9.9979	10.1617	9.8094	10.0754	10.0513	10.0949	9.9833	10.1103	9.8969	10.1508
	883	320722	ENSMUSG00000091636	Akain1	6.7623	6.3045	6.4939	7.074	6.6784	6.7585	6.0163	6.4062	6.6751	6.7583	6.4351	7.0323	6.3605	6.6698	7.0366	6.9838	6.0041	6.369	6.8128	6.8704	6.7984	6.3762	6.1836	7.1156	6.487	7.0057	6.1969	6.0473	6.4087	5.6397	6.448	8.4648	8.3095	8.5589	8.6248	8.3292	8.2913	8.4514	8.09	8.2928	8.1961	8.3337	8.0565	8.2015	8.1874
	884	239618			8.5282	8.3463	8.5678	8.5557	8.6309	8.4323	8.221	8.5353	8.3207	8.4161	8.3227	8.4285	8.4209	8.3633	8.1691	8.4603	8.1725	8.2179	8.4541	8.4355	8.4467	8.7379	8.5012	9.0307	8.4318	8.6847	8.3474	8.2805	8.1358	8.5942	8.1641	7.0049	7.0117	6.8991	6.7562	6.8052	6.5832	6.6272	6.5629	6.75	7.0418	6.7655	6.6755	6.9202	6.5486
	885	243616	ENSMUSG00000030307	Slc6a11	14.0403	13.9904	14.0145	13.8144	14.1875	13.895	14.1049	14.1433	13.9887	14.0051	14.005	13.8739	13.8377	13.9403	13.7789	13.8574	12.0045	11.8097	12.166	12.1307	12.2074	12.2729	12.0934	11.7934	12.0963	12.4988	11.6911	12.1092	11.8986	11.896	12.0084	11.5044	11.3946	11.4333	11.5994	11.359	11.5881	11.4051	11.3717	11.5866	11.3531	11.2505	11.5915	11.4747	11.4145
	886	20617	ENSMUSG00000025889	Snca	10.2959	10.3578	10.599	10.3459	10.5069	10.5095	10.2834	10.5554	10.2916	10.4934	10.5248	10.3746	10.5314	10.4134	10.3981	10.4306	12.2446	12.2021	12.1625	12.2477	12.0893	12.0309	12.077	12.1378	11.8721	11.908	12.4409	12.0937	12.2023	12.1526	12.2091	12.2679	12.3102	12.5105	12.5132	12.3961	12.461	12.355	12.4099	12.3536	12.267	12.4877	12.0932	12.317	12.4174
	887	64099	ENSMUSG00000022439	Parvg	5.9818	5.852	5.7371	4.3659	6.4053	6.4566	5.9865	4.785	5.8411	6.1716	6.2044	5.614	5.5138	6.0974	5.6014	5.9658	7.1513	7.6883	8.0565	7.9233	7.87	7.7969	7.2176	7.3173	7.3034	7.5468	7.0161	7.823	7.3655	7.7519	7.6544	8.1721	8.3183	8.1024	8.0792	7.9477	8.0278	7.6284	8.273	8.0034	8.0529	8.2319	8.1222	7.9808	8.2769
	888	219170	ENSMUSG00000045655	Fam216b	6.4687	6.4223	7.1238	6.5162	6.814	6.838	7.0305	6.6674	6.8546	6.4188	6.1105	6.626	6.7578	6.5833	6.2584	5.9658	4.6941	4.2053	5.2008	4.6259	5.7501	4.9239	2	6.3138	2.4469	5.8985	3.5082	3.6666	4.8221	3.625	5.9921	4.8073	4.9705	5.6187	4.7711	5.3327	5.6742	5.8886	4.9715	5.1853	5.6726	4.9164	5.7179	5.2326	5.4206
	889	72147	ENSMUSG00000027583	Zbtb46	6.8894	6.441	6.6936	7.2835	6.6605	6.6744	6.6492	6.5939	6.5889	6.5002	6.7318	6.8025	6.5728	6.7214	6.6361	6.3329	6.9101	6.5027	6.9367	6.5897	6.4005	7.7217	5.9596	6.7697	7.0424	6.8493	6.6639	6.9017	6.7307	7.1131	6.2478	7.1108	5.9684	6.1127	6.4578	6.031	6.4039	6.2063	6.5468	5.8681	5.7063	6.2608	6.2924	6.4593	6.0921
	890	20450	ENSMUSG00000025789	St8sia2	8.8903	8.2593	8.5805	8.3159	8.4025	8.9142	8.6054	8.4955	8.553	8.3858	8.2363	8.4813	8.5266	8.6927	8.6295	8.3962	6.0346	6.2523	6.7965	6.6133	6.2391	5.977	5.6086	6.6331	6.2597	7.3101	6.2538	5.9636	6.6312	6.3044	7.1054	6.1609	6.241	5.837	6.1138	5.8952	6.2707	5.6399	6.047	5.6247	5.9508	5.6817	6.3776	5.4698	5.6309
	891	245038	ENSMUSG00000032500	Dclk3	8.9831	9.2735	8.8182	8.8847	9.2668	8.9203	8.9046	8.8776	8.9136	8.8522	8.891	9.1162	8.8081	9.0762	8.9485	8.8655	10.2133	10.219	10.0911	10.1853	9.8927	9.7502	10.0615	9.9018	10.2609	10.2413	10.2939	10.2025	10.0992	10.3425	10.1489	9.0407	8.8674	8.941	9.0644	9.1477	8.7749	8.7457	9.129	8.7874	8.8853	9.1339	8.6116	8.6712	9.1244
	892	224090	ENSMUSG00000022537	Tmem44	8.8973	8.8866	8.571	8.157	8.7371	8.7662	8.6862	8.8223	8.8958	8.8632	8.7147	8.7143	8.6487	8.6693	8.6248	8.7348	10.5392	10.5132	10.3527	10.3701	10.3619	10.1984	10.5393	10.7388	10.1528	10.1828	10.1552	10.4314	10.5879	10.3061	10.4209	9.9194	9.9118	9.9007	9.8083	9.8819	9.9038	10.1642	9.8553	10.012	10.0165	9.7765	9.8874	9.9615	9.7665
	893	18208	ENSMUSG00000020902	Ntn1	9.2339	9.2994	8.9213	8.7685	9.4908	8.9916	9.1984	9.319	9.2428	9.1384	9.0733	9.0213	9.1199	9.308	9.2281	8.9122	8.088	8.0878	8.1363	8.3324	8.1933	8.3949	8.1228	8.5388	8.7947	8.7109	7.5805	8.4126	8.4886	8.162	8.1221	8.233	7.9054	7.3081	7.5253	7.5311	7.3695	7.4678	7.3392	7.4724	7.621	7.5884	7.803	7.5496	7.5975
	894	18111	ENSMUSG00000067786	Nnat	13.546	13.6449	13.6406	13.2388	13.8676	13.4019	13.7086	13.4673	13.5031	13.5349	13.4212	13.1734	13.3891	13.5069	13.1587	13.21	12.8149	12.2599	12.8214	12.6572	12.5369	13.0958	12.2695	12.7197	12.5178	12.9957	12.099	12.4464	12.4683	12.434	12.5258	11.7709	11.8764	12.319	12.3956	11.7527	12.5176	12.3475	11.699	12.2822	12.0945	11.8532	11.6423	12.2665	11.9937
	895	19885	ENSMUSG00000028150	Rorc	5.9993	6.3449	6.1132	6.1391	6.6055	5.9366	6.7231	6.7711	6.651	6.6504	6.3139	6.6023	6.5123	6.4672	6.3056	6.2295	6.3569	5.7047	6.1201	5.8609	5.5284	6.1654	5.5175	5.2458	5.4812	6.1682	4.6241	5.4517	5.3008	5.0969	5.5288	6.2478	6.1111	5.589	5.1323	5.5781	5.3168	4.5732	5.5916	5.5863	5.8029	5.6577	5.7942	6.3015	4.7628
	896	13176	ENSMUSG00000060534	Dcc	9.4024	9.0989	9.1143	9.2684	9.137	9.5862	9.2864	9.319	9.5388	9.3334	9.3654	9.583	9.5888	9.518	9.4956	9.455	9.0991	8.6571	9.0457	8.6393	8.8295	9.0323	9.2065	8.6133	8.8817	8.8908	8.9864	8.2277	8.3612	8.5468	8.8667	8.9734	9.363	9.9888	9.5413	9.6408	9.43	9.8442	9.5085	9.351	8.9359	9.2645	9.3134	9.4151	9.2123
	897	209195	ENSMUSG00000022949	Clic6	9.0134	8.9823	9.1927	8.5641	9.0366	9.0031	9.5326	9.1646	8.9756	8.861	9.0097	8.8561	8.8857	8.9693	8.7018	8.9972	5.578	7.7216	6.9067	7.4716	7.7638	7.9873	7.4072	8.1624	7.7841	8.9415	7.2011	8.1222	7.1041	6.7297	7.879	7.396	7.5267	7.4719	7.0632	8.8913	10.6198	7.4334	7.072	6.5451	8.0063	7.4765	10.5746	9.2047	7.8472
	898	60510	ENSMUSG00000062542	Syt9	9.7321	9.542	9.7529	9.3368	9.8866	9.7731	9.6722	9.5488	9.7162	9.7553	9.7551	9.7698	9.7611	9.6622	9.9994	9.7138	8.8986	8.3157	8.9385	8.5865	8.5138	8.5036	8.4529	8.3484	8.7468	8.8173	8.8127	8.3914	8.2977	8.412	8.3438	7.4775	6.8902	6.8497	6.9132	6.9922	7.4942	7.4159	6.4283	6.914	6.8289	6.2123	8.1123	7.3218	6.5254
	899	242620	ENSMUSG00000047143	Dmrta2	6.6453	7.17	6.3085	5.381	6.6961	6.554	5.8279	6.4485	6.8756	7.0328	7.1412	6.3128	6.9825	6.3542	6.6726	6.2561	6.86	5.565	6.1201	6.3291	5.9422	6.4192	5.814	5.0688	5.7771	6.3953	4.3386	6.3843	6.1659	6.1004	6.3052	6.6309	6.2033	6.2136	6.3243	6.0887	6.5944	6.2661	6.0698	6.4197	6.3636	6.2448	6.2019	5.9999	6.1839
	900	78896	ENSMUSG00000026051	1500015O10Rik	4.9136	4.5946	5.1943	4.2863	4.2587	5.2764	4.573	3.4241	4.3279	4.8132	4.768	3.382	4.9096	4.9038	3.8261	4.8615	5.2553	5.6596	4.2577	5.8609	5.9119	4.2525	4.9484	4.6325	4.4215	6.1103	4.6241	5.3674	5.1026	5.3013	5.0801	5.6755	5.8099	5.6187	5.3402	7.6623	9.5193	5.9385	5.5597	4.8386	5.8639	5.5834	9.3953	7.2094	5.9249
	901	16421	ENSMUSG00000001281	Itgb7	3.6389	4.4542	4.5381	5.0839	3.6818	4.0239	4.3104	2.2755	3.8235	4.8132	4.2563	4.7273	4.1962	3.6884	2.9669	4.0475	3.6096	3.3814	3.8162	3.9204	2.7126	3.935	4.8017	4.3522	3.2942	4.0234	4.4402	3.8013	3.7123	4.6941	4.4252	4.8524	3.85	4.0033	3.2385	3.927	3.6109	4.6943	3.7523	4.2887	4.2066	3.1812	3.6533	4.2387	4.0613
	902	170442	ENSMUSG00000041660	Bbox1	6.2236	7.2032	7.5219	7.9592	7.5945	7.6311	7.6677	7.4151	7.7179	7.7647	7.5157	7.4047	7.5721	7.8174	7.4993	7.4653	5.7345	4.9675	5.7663	4.7161	6.0848	6.1399	4.1242	5.9293	4.8426	5.7547	5.7595	6.2494	5.475	4.9587	5.206	5.7004	5.5339	6.4136	6.0133	5.6717	5.4946	5.0971	5.7692	5.4646	5.5294	5.6086	6.044	5.3895	5.6524
	903	399548	ENSMUSG00000046480	Scn4b	8.9226	8.5236	8.6452	8.4771	8.3533	8.7526	8.6629	9.0863	9.0695	8.8958	8.7424	8.9943	8.9479	8.7682	8.996	9.0588	7.6896	9.7147	7.1944	8.0413	8.7245	7.3959	8.7911	7.9034	9.68	9.9968	7.7082	7.8774	9.3986	7.2379	7.7402	9.589	8.9438	8.7626	8.6248	9.3417	8.9572	8.5709	9.3194	9.0948	8.8999	9.0943	9.3581	8.6661	9.3292
	904	22068	ENSMUSG00000031997	Trpc6	6.623	6.4033	6.3386	5.919	5.3432	6.7855	6.9557	6.6433	6.6631	6.2409	6.6673	6.2833	6.809	6.701	6.3286	6.4524	6.3327	6.8221	7.4653	7.1545	6.8789	6.598	6.8202	6.5846	5.7383	6.5485	6.5994	5.8748	7.5246	7.4157	7.3433	8.6293	8.9999	8.7791	8.4563	9.0005	8.3974	8.7139	8.8681	8.5882	8.6151	8.4671	8.4829	8.5303	8.8603
	905	18197	ENSMUSG00000020297	Nsg2	12.656	12.8165	12.8776	12.6775	12.9222	12.6756	12.6418	12.6705	12.601	12.7941	12.6609	12.6881	12.6874	12.6785	12.6874	12.7357	13.1152	13.1002	13.2104	13.1532	13.1252	12.9496	13.1934	13.0512	13.1262	13.1574	13.4197	13.1535	13.1343	13.0887	13.0866	12.7883	12.8491	12.8701	12.9621	12.9543	13.0594	12.7888	12.9278	12.9673	12.8777	12.999	12.6617	12.9495	12.8662
	906	76117	ENSMUSG00000049744	Arhgap15	3.9572	5.5753	5.0919	5.919	4.6697	4.9345	5.3563	6.0869	5.5336	5.4733	4.9953	5.2978	5.5938	5.4105	5.2131	5.2788	6.3327	7.2751	7.3696	7.278	6.999	7.0984	6.9823	6.972	7.2631	7.1468	7.4282	6.9166	7.1147	7.2964	7.1054	7.8771	8.2114	8.3619	8.4435	8.1591	7.9731	8.3258	8.1713	8.2382	8.0594	8.1782	8.041	8.0294	8.0065
	907	21892	ENSMUSG00000053626	Tll1	5.8725	5.6088	4.8623	4.9864	6.0128	5.4211	6.1828	4.5971	5.9037	6.0222	6.0099	5.7056	6.1907	6.0658	5.967	5.4263	6.0935	6.1582	6.2453	6.7688	5.7839	5.8881	6.5936	4.2727	6.2597	4.6294	6.3351	6.4266	6.0161	6.3044	6.2478	6.9015	6.4381	6.6624	6.2817	6.2693	6.3783	5.8104	5.9273	6.4628	6.254	6.1958	6.7794	6.5873	6.325
	908	12491	ENSMUSG00000002944	Cd36	5.6026	6.4033	5.8873	6.3884	6.4476	6.1174	6.4888	6.7711	6.8009	6.1573	6.5824	6.9027	6.8746	6.701	6.4596	6.6654	6.1222	5.9112	6.7634	6.1787	6.3562	6.7403	6.2129	6.5513	5.6155	7.078	5.7983	5.7133	6.8494	6.5164	5.3942	4.8073	4.6719	5.3963	4.9266	4.8085	5.2333	5.7833	4.5205	4.1898	4.9874	4.264	4.6967	5.5159	3.9261
	909	244886	ENSMUSG00000032313	Tmem266	6.98	7.1811	7.0619	6.1391	7.2445	6.8636	7.4234	7.4008	7.3941	7.403	7.3406	7.0323	6.9372	7.3646	7.1181	7.4308	7.5279	7.0835	7.6667	7.4845	7.6399	7.7472	7.8974	7.3369	7.3683	7.0267	7.1268	7.1107	7.2741	7.6129	7.7471	7.9721	6.4913	6.6336	6.8755	6.7844	6.9916	6.7157	6.8661	6.8343	6.7503	7.0947	6.5924	6.9652	6.9481
	910	319586	ENSMUSG00000034818	Celf5	11.3694	11.4579	11.1806	11.3687	11.3272	11.2497	11.1951	11.1523	11.1014	11.0716	10.9856	11.1761	11.2419	11.1939	10.9592	11.0025	12.5727	12.3313	12.4967	12.2836	12.2527	12.365	12.2112	12.1374	12.3602	12.1545	12.432	12.3572	12.3277	12.3865	12.387	12.1453	12.2636	12.2776	12.1807	12.1606	12.1809	12.2499	12.1497	12.2396	12.2306	12.1064	12.0559	12.1401	12.2829
	911	54611	ENSMUSG00000041741	Pde3a	7.0818	5.9069	6.0047	5.4917	6.6605	6.3156	6.8106	4.8705	6.3099	5.8904	6.1105	5.7056	6.4055	5.9321	5.967	6.2821	4.839	5.4102	6.0669	6.1139	6.0848	5.7603	5.7752	4.6325	6.0225	5.9869	6.4613	6.2256	5.9468	6.01	5.5606	5.6755	5.4504	5.8867	5.8086	5.7309	5.3699	4.4409	4.7065	5.3317	4.9874	5.2079	4.3371	5.157	5.289
	912	332175	ENSMUSG00000036304	Zdhhc23	6.8987	5.8238	6.1132	6.2483	6.095	5.9366	5.9562	4.9115	6.1811	5.8197	5.6245	5.9871	6.1907	5.823	5.8122	5.9333	6.7543	6.0223	6.9806	6.6133	6.4005	6.332	6.7215	6.649	6.5101	6.7389	6.4122	6.7434	7.1147	6.1436	6.5934	7.9823	8.0111	8.1285	8.0457	8.0296	8.1767	8.1304	8.0156	7.974	8.013	7.9258	8.1708	8.4154	8.1461
	913	170721	ENSMUSG00000021223	Papln	6.4435	6.5656	6.06	7.2098	6.7135	6.6155	7.1153	7.0712	6.4973	6.9771	6.2492	6.6493	6.3374	6.6272	6.2822	5.3788	7.3089	6.8221	6.5076	5.6935	6.7984	6.7903	6.801	5.9031	6.8917	5.4776	6.3869	6.8247	6.3914	5.9865	6.4136	5.1699	4.7438	5.0038	4.6424	4.284	5.1139	3.8503	4.0561	4.9637	4.7496	4.1311	4.528	4.4435	4.4543
	914	23956	ENSMUSG00000079434	Neu2	2	4.3785	3.8944	4.8818	4.6697	4.0239	4.573	4.2594	4.3874	4.2398	4.2563	5.2978	4.1962	4.5402	4.6068	4.3726	6.1222	6.1582	4.8686	5.6019	4.0682	5.1447	5.6943	6.123	6.0543	5.2817	5.3007	5.7471	5.9229	4.9095	5.3218	3.8744	4.0333	4.463	3.1145	3.6486	3.9265	3.951	3.9617	4.3813	3.3258	3.9848	3.2812	3.4222	3.4223
	915	20692	ENSMUSG00000018593	Sparc	14.1367	14.2224	14.4374	13.9571	14.6132	14.1635	14.507	14.2142	14.2085	14.4639	14.336	14.1499	14.1645	14.2211	13.9785	14.1783	11.9051	11.8162	12.2517	12.2487	12.1595	12.4053	12.186	11.7705	12.0935	12.7762	11.636	12.2883	11.8994	11.9356	12.2982	11.8302	11.4092	11.4796	11.6105	11.3031	11.7839	11.6138	11.4383	11.5817	11.5876	11.4144	11.6492	11.5331	11.6446
	916	71738	ENSMUSG00000033207	Mamdc2	6.9975	6.5311	6.8793	6.9631	6.3167	6.9134	6.5911	6.6793	6.8756	6.7583	6.7475	6.3128	6.7578	6.701	6.3956	6.685	4.9063	3.3814	4.2577	4.0646	4.9461	2.7027	3.5192	5.2035	4.2114	2.5574	3.075	4.2412	5.0595	4.0449	3.1926	5.7725	4.5569	5.4959	4.8116	4.323	5.1748	4.2954	5.1099	4.8386	5.7392	3.733	5.5809	5.2509	4.5947
	917	21386	ENSMUSG00000018604	Tbx3	8.8856	8.7356	8.2208	8.8813	8.1311	8.2698	8.6954	8.6486	8.4274	8.5145	8.3227	8.063	8.6627	8.4817	8.0495	8.2846	6.0041	5.9112	5.6979	5.7796	6.1117	6.0608	6.4531	6.1455	6.7235	5.8755	4.3386	6.2014	5.015	5.5462	6.4136	5.6755	6.0272	4.3959	6.2078	5.478	5.7158	5.7557	5.8765	5.4646	5.452	5.5316	5.7179	5.3044	5.4941
	918	212124	ENSMUSG00000049571	Cfap46	6.861	7.2032	7.0253	6.7569	6.7978	7.2208	7.2465	6.9875	6.7451	6.9191	6.6507	6.9409	7.1105	6.7415	6.7599	6.6454	6.0346	5.6596	5.7663	5.6935	5.817	6.0608	4.5491	5.3267	6.3904	4.2549	5.5931	5.7471	5.3008	6.1647	6.7669	4.1876	4.1437	4.9107	3.6491	4.6941	4.4047	4.806	4.5852	4.9025	5.3277	4.1991	4.528	4.8796	4.5026
	919	20620	ENSMUSG00000021701	Plk2	9.6938	9.5973	9.6011	9.5983	9.4075	9.8487	9.4176	9.9836	9.6077	9.4767	9.4708	9.6364	9.6249	9.6896	9.6971	9.5705	11.387	11.7464	11.271	11.5281	11.4308	11.1742	11.6122	11.5008	11.5362	11.0204	11.8921	11.3463	11.6392	11.5668	11.4349	11.8024	11.938	11.8313	11.9599	12.0598	11.8911	11.9212	12.0615	11.9923	12.0177	12.0644	12.0371	11.9011	11.9625
	920	243548	ENSMUSG00000030020	Prickle2	10.9866	11.0984	11.0994	11.2981	11.0396	11.1559	11.2407	11.1089	11.323	11.2677	11.2075	11.272	11.265	11.2344	11.2407	11.1775	12.6411	12.5629	12.5095	12.413	12.5908	12.2997	12.6772	12.4737	12.2916	12.1919	12.6088	12.394	12.4585	12.3495	12.3773	12.5856	12.7548	12.8393	12.7824	12.9044	12.7637	12.703	12.9113	12.8272	12.7028	12.726	12.7344	12.7279	12.7686
	921	12494	ENSMUSG00000029084	Cd38	8.4125	8.4236	8.7272	8.6382	8.3365	8.6164	9.0155	9.1217	9.1383	8.8072	9.0608	8.9668	9.2273	9.0997	9.0032	9.0886	3.0185	6.369	6.3155	6.0108	6.4852	6.3762	6.0272	7.2146	5.7383	6.7642	4.5351	6.4677	5.5703	6.5488	6.8846	7.7754	7.9441	7.8435	7.9401	7.7219	7.3695	7.8401	7.4649	8.0034	7.9858	7.7837	8.0565	7.8429	7.8092
	922	623279	ENSMUSG00000073514	Dok6	7.3702	7.4169	7.9983	7.5625	7.8526	7.7727	7.9859	8.1428	7.7692	7.9457	7.4501	7.7974	7.5819	7.8315	7.6531	7.3954	9.3434	8.9377	9.0695	8.494	8.8214	9.0563	9.4661	9.0724	8.6193	9.0038	8.999	8.8573	8.9149	8.6992	8.9259	8.7324	8.7952	8.7152	8.9847	8.7045	8.9894	8.4341	8.7844	8.8776	8.4055	8.1697	8.5283	8.8348	8.8227
	923	96875	ENSMUSG00000006014	Prg4	4.7167	5.1441	6.1813	2	3.5325	6.812	5.1572	3.9805	4.3874	5.6467	5.7544	4.8924	3.5627	7.5642	6.2822	4.1642	7.0053	7.8273	6.8761	8.1665	7.9763	7.8211	7.7146	7.6981	7.8123	8.1408	6.4853	7.7416	8.5754	6.1436	6.9218	5.7004	5.554	7.5512	6.1458	5.7878	6.3912	6.3606	5.952	6.2824	6.006	5.7958	5.8668	6.4194	5.3163
	924	216439	ENSMUSG00000025422	Agap2	12.6723	12.6146	12.4753	12.4081	12.8562	12.5261	12.5883	12.4779	12.3718	12.5897	12.4622	12.4033	12.3499	12.3702	12.3052	12.2934	15.1234	14.693	14.895	14.8788	14.8664	14.7622	14.7461	14.7055	14.7513	14.9965	14.653	14.8577	14.9659	14.8861	14.8001	14.7355	14.722	14.6205	14.7889	14.5792	14.8075	14.5002	14.7089	14.8391	14.8623	14.73	14.7257	14.7245	14.7567
	925	53602	ENSMUSG00000071379	Hpcal1	11.2304	11.2848	11.3898	11.0326	11.1991	11.2363	11.1935	11.0659	11.0585	11.1493	11.2237	11.0808	11.0425	11.0425	10.8961	11.1406	11.4901	11.0375	11.6105	11.6097	11.4794	11.5269	11.2147	11.1355	11.2283	11.5012	11.7349	11.3763	11.3238	11.6341	11.5253	10.1113	9.5133	9.6061	9.8318	9.498	9.6685	9.9238	9.4402	9.6239	9.3969	9.548	9.1193	9.4442	9.4326
	926	70918	ENSMUSG00000029206	Nsun7	6.4812	6.844	6.7395	6.8289	6.2223	6.554	7.0593	6.5813	6.524	6.9771	6.8528	6.3977	6.6118	6.4792	6.3056	6.2025	7.1373	7.4574	7.4022	6.6595	6.8945	7.3186	7.1883	7.6905	6.9266	6.5485	7.1115	6.9314	6.9235	7.0912	7.0505	6.481	7.1304	7.2711	6.5201	6.6906	6.7019	6.9767	7.0378	7.0186	6.874	6.8096	7.042	7.1953	6.7422
	927	18162	ENSMUSG00000022206	Npr3	7.4923	6.6159	7.1151	5.7805	6.7813	7.5547	6.9861	7.1157	7.2002	6.9021	7.4112	7.1348	7.2154	7.625	7.0914	6.685	8.423	7.5344	8.3686	8.3466	7.9317	8.3118	7.87	7.5874	7.3934	7.7052	7.6877	7.3711	7.9999	7.5501	8.2832	8.4055	8.7674	9.1541	9.1178	9.0377	9.2646	9.0955	8.6735	8.825	9.1712	8.6113	9.3306	8.9597	8.5193
	928	269587	ENSMUSG00000028906	Epb41	9.2339	9.0601	9.2293	9.0596	9.2873	9.0595	9.115	8.9506	9.1662	9.1457	8.9966	9.1815	9.1827	9.1133	9.2219	9.1536	8.3643	8.84	8.4332	8.645	8.7926	8.8123	9.0282	8.9467	8.6971	8.7011	8.0905	8.6091	8.6752	8.162	8.7475	9.2904	8.4342	8.4638	8.401	8.5027	8.649	8.3117	8.3495	8.1356	8.5701	8.4671	8.432	8.3846	8.3078
	929	21922	ENSMUSG00000025784	Clec3b	5.7541	6.0601	6.1132	4.935	6.3167	6.6452	6.5712	7.3271	6.1122	6.0686	5.6245	5.5659	5.7416	6.5721	5.8445	5.9	4.6941	4.5399	4.6686	7.0195	5.061	6.8385	3.6959	6.6801	6.2868	6.0703	4.8623	5.132	6.5242	5.4804	4.6188	5.5715	4.8454	4.8618	3.9683	5.2542	5.3168	4.4409	5.741	4.9637	5.0931	4.8333	5.0271	5.3561	5.289
	930	68655	ENSMUSG00000071984	Fndc1	7.0318	7.3191	6.959	7.3039	7.2203	7.7455	7.0593	7.7101	7.2651	7.1599	7.0805	7.276	7.3824	7.148	7.4476	6.6252	7.8859	7.7433	7.5743	7.278	7.564	6.8852	6.7618	7.1824	7.547	6.6195	7.9076	7.1988	7.1664	7.5975	7.005	6.2646	7.2087	7.388	7.4048	7.0103	7.3365	7.1024	7.0493	6.8506	6.3207	6.8734	6.5781	6.8257	6.9038
	931	98845	ENSMUSG00000025504	Eps8l2	6.6997	6.1077	5.7595	5.9709	6.0681	6.554	6.284	6.4345	5.507	5.7261	5.6909	6.2226	5.5543	5.5765	6.3286	6.2821	6.0041	6.5027	6.1715	6.046	6.6954	6.5792	5.6521	6.4098	7.2901	6.1491	4.9337	6.0473	5.8233	5.6092	6.2863	7.12	6.1775	6.0265	6.5916	6.698	7.1669	6.2464	6.4803	6.0198	6.4655	6.323	7.0933	6.2295	6.4899
	932	170942	ENSMUSG00000096768	Gm47283	4.9499	5.0976	5.3795	5.2187	6.095	5.6141	5.2096	5.6033	9.1274	7.6471	5.9019	4.8122	5.5543	4.9038	5.7106	4.9936	4.9063	8.5438	5.3862	4.1957	4.6111	5.5445	3.8532	4.0992	6.533	6.0703	5.4049	4.6511	5.8233	6.9279	6.6087	5.3378	4.7438	5.5586	5.2548	4.5699	5.7956	6.2464	5.8504	8.2257	7.715	5.7958	5.3304	8.241	3.6961
	933	14786	ENSMUSG00000019312	Grb7	4.5843	4.0286	4.0482	4.6468	5.1516	4.9345	3.7269	4.6941	4.4996	4.1272	3.6013	3.382	4.2952	4.4935	4.8805	3.4548	5.1481	4.8915	4.8686	5.3437	4.0682	5.0926	5.0166	3.6735	5.5274	4.7354	4.3386	4.6511	4.8728	4.3698	5.7098	5.5442	4.8123	4.2514	4.5497	4.9397	4.5031	4.0451	4.5205	5.2358	4.9315	4.4428	4.2673	4.0426	4.7628
	934	242608	ENSMUSG00000028600	Podn	2.2536	3.926	3.6279	5.3021	4.4374	4.8347	3.5754	2	3.5383	3.5609	3.2945	3.5887	3.5627	4.5854	4.7501	3.0319	6.6203	6.5773	6.1965	6.682	5.817	6.5792	6.2416	6.649	6.3134	5.7033	6.0439	6.6572	7.3476	6.7989	7.1161	5.3999	6.0415	5.9814	5.7885	5.4952	6.312	6.0334	5.4597	5.2845	6.2077	4.995	6.2204	6.032	5.3952
	935	13839	ENSMUSG00000029245	Epha5	10.5004	10.5261	10.4115	10.6563	10.4495	10.5375	10.5593	10.4911	10.7106	10.5955	10.7273	10.996	10.6786	10.8346	10.8087	10.784	11.033	11.3288	11.2124	11.0984	11.0098	10.869	11.4515	10.9331	11.1667	10.9327	11.6138	11.2069	11.1112	10.8971	10.9563	10.987	11.2712	11.4015	11.1603	11.4416	11.1191	11.2759	11.3757	11.2592	11.1937	11.3011	11.2836	11.0823	11.1718
	936	20111	ENSMUSG00000003644	Rps6ka1	8.8596	8.7393	8.9411	8.701	8.5458	8.5861	8.7627	8.6785	8.6259	8.6092	8.607	8.5385	8.4264	8.4361	8.5824	8.7721	8.1861	8.018	8.4013	8.4221	8.616	8.4425	8.2343	7.6595	8.4619	8.2566	7.7582	8.3645	8.1768	8.4383	8.3208	8.7856	8.3388	7.7922	7.9583	8.0702	8.2774	7.8853	8.0215	8.0323	8.4309	8.046	8.2038	8.0214	8.1688
	937	14219	ENSMUSG00000019997	Ctgf	5.9818	6.1077	6.3535	4.6468	6.095	6.5223	6.4237	6.7822	6.428	6.2543	6.6999	6.1263	6.4492	7.345	6.1068	6.6047	8.6413	9.2845	8.4066	9.6407	8.6892	9.5352	8.8389	8.9909	9.5093	8.6135	8.0266	9.221	9.6373	8.9077	8.938	7.9411	7.7038	8.2805	7.4821	8.1374	8.2208	8.6739	7.9185	8.6075	8.237	8.1949	7.334	8.1488	7.5408
	938	209540	ENSMUSG00000085584	Rtl9	6.8894	6.991	7.0437	7.439	6.5676	7.2978	6.6492	7.5378	7.273	7.2229	7.1292	7.4845	7.083	7.2215	7.0914	7.3834	5.8068	5.7485	6.3605	4.881	5.4463	5.5445	5.1439	6.077	5.4335	5.8985	5.836	5.8748	4.2615	5.4114	5.2456	4.5024	4.6719	4.7042	4.8509	4.602	4.1249	4.1334	4.1446	4.7017	4.6834	4.3856	4.8947	4.4435	4.1849
	939	14708	ENSMUSG00000048240	Gng7	10.1552	9.936	9.9511	9.6629	10.2336	9.9204	10.0482	9.8037	9.9428	10.0018	9.9991	9.8772	9.774	9.9528	9.8952	9.6848	12.0867	11.9862	11.9324	11.687	12.1355	11.8247	11.8355	11.842	11.667	12.4696	11.311	11.7086	12.0062	11.8001	11.8566	12.0274	12.065	11.9795	11.9719	11.9341	12.0246	11.7255	12.077	12.0303	12.0761	11.9675	11.8736	12.0083	12.0207
	940	216441	ENSMUSG00000040441	Slc26a10	6.0997	5.0497	4.686	5.1302	4.1603	4.7274	4.6509	3.178	4.997	4.7385	4.3415	4.4376	4.475	3.7691	4.3609	4.7162	6.4726	5.7909	6.0669	6.2708	5.4879	5.8881	5.0816	6.2735	6.0855	6.0904	5.2457	5.5314	5.6007	6.1222	6.4309	7.9148	7.7997	7.9701	7.012	8.0958	7.2959	8.0813	8.1607	8.0323	8.1479	8.3261	7.8395	7.2599	8.2559
	941	18187	ENSMUSG00000025969	Nrp2	10.4679	10.3688	10.6836	10.4649	10.4586	10.5095	10.5053	10.5079	10.4422	10.5395	10.2675	10.4243	10.3901	10.5315	10.3112	10.5016	10.5524	10.8255	10.7836	10.8247	10.5774	10.3779	10.8897	10.7825	10.7477	10.5434	10.8998	10.7904	10.5019	10.5771	10.6197	9.9791	10.2425	10.4106	10.2095	10.2189	10.3176	10.3984	10.3232	10.2439	9.8072	10.1167	10.1091	10.476	10.3912
	942	108699	ENSMUSG00000056486	Chn1	11.5905	11.5567	11.6427	11.8637	11.6234	11.7051	11.6901	11.7394	11.7381	11.6276	11.7632	11.8621	11.8323	11.7301	11.8579	11.8579	13.5325	13.7569	13.5084	13.6893	13.6253	13.0995	13.6894	13.6886	13.4092	13.2108	13.9596	13.4697	13.6801	13.549	13.481	13.962	14.1562	14.1383	14.1312	14.2138	13.9361	14.0032	14.2124	14.0537	14.0504	14.2389	14.0005	13.9916	14.0732
	943	57339	ENSMUSG00000042686	Jph1	6.6563	6.4595	5.8873	6.1616	6.3836	6.3522	6.1019	6.7932	6.6265	6.1997	7.0555	6.529	6.5529	6.3801	6.6726	6.7977	8.2196	8.2714	8.515	8.2059	8.0753	7.4794	8.5765	7.9867	7.7746	8.3964	8.3861	7.7582	8.8276	8.2136	8.4151	10.0498	10.2308	10.0945	9.8719	10.0218	9.7683	10.0596	10.1252	10.0048	10.2514	10.2164	9.8536	9.8903	10.2265
	944	240505	ENSMUSG00000024769	Cdc42bpg	7.93	7.5862	7.5735	7.7817	8.0232	7.8257	7.9859	7.778	7.7295	7.6623	7.7674	7.2909	7.7398	7.625	7.5878	7.4539	8.066	7.631	7.7536	7.8654	7.8056	7.8211	7.2882	7.5709	7.6755	7.9559	6.8038	7.3046	7.6607	6.9645	7.5474	8.2709	7.7438	7.48	7.6365	7.5962	8.0725	7.4247	7.222	7.6504	7.9156	7.4697	8.0199	7.9671	7.5056
	945	24001			7.2072	7.3191	7.3697	7.188	7.2324	7.3164	7.401	7.9839	7.4511	7.4269	7.4014	7.5353	7.4908	7.3184	7.394	7.0152	10.4574	10.4682	9.7651	10.1187	9.9422	9.816	10.2107	10.1091	9.958	9.8259	10.3024	10.0804	10.1515	10.243	10.0502	9.2615	9.106	9.3127	9.0305	9.2423	8.983	9.4345	9.3336	9.3103	9.1591	9.3529	8.9571	8.9344	9.1737
	946	271813	ENSMUSG00000040812	Agbl2	4.4887	5.4699	4.9429	4.2019	4.6697	4.8347	5.2601	4.6941	5.5336	4.9845	4.9418	4.637	5.1402	5.705	5.6387	5.3297	5.0323	4.6362	5.2008	3.5799	4.6111	4.3445	2.8045	6.4465	2.7876	5.0133	4.7872	4.4194	4.5993	4.0449	5.429	5.3999	4.7438	5.4634	4.5497	5.06	5.446	4.9097	5.1099	4.5504	5.5665	4.7899	5.9801	5.3561	5.3952
	947	72301	ENSMUSG00000062760	1810041L15Rik	11.0339	10.8817	11.1363	11.0195	11.2175	11.0204	10.933	11.2175	11.0981	11.2162	10.9411	11.0957	10.9973	11.0651	11.1905	10.9648	11.336	10.9687	11.0876	11.2541	10.9763	10.9609	11.2602	11.1355	10.8881	11.2173	11.1348	11.2642	10.972	11.2225	11.067	10.6466	10.634	10.6733	10.8082	10.5648	10.7556	10.4637	10.7492	10.7167	10.5295	10.6382	10.7301	10.7213	10.8735
	948	110834	ENSMUSG00000032303	Chrna3	6.4307	6.9393	7.1495	6.9631	6.6605	6.7855	7.2958	6.9189	6.844	6.5772	6.4543	7.3346	6.7578	6.7613	6.6361	6.9838	4.6941	3.7688	4.805	4.1957	3.9539	5.1447	3.318	2	4.4215	4.3244	4.5351	3.9245	3.9195	3.2033	4.4252	4.0395	3.85	3.7035	4.2296	3.4515	3.5198	4.4409	4.3817	3.3892	3.141	3.5368	3.4162	3.4222	3.6105
	949	228432	ENSMUSG00000074968	Ano3	7.2295	6.5826	6.8057	7.554	6.1977	6.838	7.3199	7.098	7.1321	7.0638	6.8673	7.3489	7.5422	7.2215	7.0914	7.2042	9.5444	9.5108	9.7312	9.6663	9.3788	8.9246	9.5998	9.636	9.2171	9.3653	9.8984	9.224	9.8967	9.458	9.5281	10.4069	10.6215	10.5987	10.5161	10.5587	10.266	10.3861	10.8148	10.4028	9.8092	10.4644	10.3941	10.2665	10.5498
	950	20732	ENSMUSG00000027315	Spint1	6.163	5.9069	6.5073	7.0621	6.8301	6.1174	6.551	6.4485	6.1471	6.1857	6.3139	5.9871	6.2413	6.0498	6.0245	6.1469	6.6984	6.1254	6.5275	6.7688	6.0848	7.6332	7.0159	5.021	6.2597	6.6195	6.8227	6.946	6.758	6.627	6.9095	5.1699	5.1664	5.2134	5.5933	5.478	5.9604	5.0064	5.7692	5.5063	5.6726	5.9418	5.224	5.7781	5.5178
	951	12326	ENSMUSG00000038128	Camk4	9.6252	9.5678	9.6694	9.8718	9.7726	9.8261	9.8122	10.0074	10.0664	9.8303	10.0299	10.2335	10.1282	10.1013	10.2731	10.1503	11.925	12.2749	11.7251	11.749	12.1469	11.2915	12.1154	11.9727	11.6172	11.7336	12.3946	11.6001	12.0846	11.7394	11.7916	11.7442	11.3668	11.6926	11.4789	11.4611	11.2065	11.5227	11.2732	11.3917	11.1096	11.288	11.4289	11.2509	11.1506
	952	18807	ENSMUSG00000003363	Pld3	13.2533	13.286	13.2752	13.1044	13.4292	13.1627	13.1779	13.0535	12.9105	13.2148	13.0337	12.946	12.9171	12.9325	12.902	13.0182	13.5984	13.5655	13.6116	13.8517	13.5116	13.293	13.5705	13.4323	13.6624	13.4758	13.8105	13.6992	13.6661	13.713	13.5427	13.0406	12.9742	12.915	13.0983	13.0544	13.1742	12.8712	13.1744	13.0791	13.113	13.1467	12.8287	13.1043	13.0864
	953	432855			6.1317	4.8953	4.3138	3.8044	2.7057	3.6062	4.4034	3.729	5.3362	3.5609	4.4219	4.3264	5.2431	4.3953	4.17	4.9936	5.3551	5.7047	5.7663	5.0977	5.6062	6.332	4.8017	6.0294	6.1161	5.677	5.5483	5.5314	4.7695	5.5137	6.1256	5.5442	4.8454	3.7035	5.2251	4.7524	4.4547	4.9589	4.3817	4.4683	4.3837	4.1991	4.4671	4.8796	4.2988
	954	215772	ENSMUSG00000050994	Adgb	7.4861	6.9524	6.5594	7.177	6.5867	6.985	7.045	6.9971	7.0331	7.1599	6.5647	6.9409	6.9525	6.8287	6.7599	6.4058	5.4485	4.2053	5.5111	4.5298	5.3136	5.4231	3.318	4.3522	3.9653	5.7547	4.3386	4.4194	4.8728	5.7555	6.0153	4.7126	5.1923	5.0483	4.9985	4.9397	4.8777	5.4465	4.9715	5.3774	5.1915	4.7452	4.8476	5.0565	4.8772
	955	29857	ENSMUSG00000022610	Mapk12	6.6563	6.9524	6.7619	6.8148	6.3617	6.9134	6.7762	7.0253	6.844	6.7199	6.7784	6.529	6.7922	6.6054	5.9373	6.7236	6.3327	6.5529	5.5887	6.7688	6.3785	7.1246	5.5638	7.0215	6.6207	6.2775	5.8728	6.3407	6.0161	6.5164	6.8971	7.2094	5.938	6.0041	5.522	5.6566	5.4946	5.7833	5.5271	5.9307	5.6726	5.9016	6.0647	6.0107	5.6947
	956	100504601			5.7541	6.5993	6.4805	6.6335	5.9552	6.3522	6.0454	6.2868	6.5633	6.4307	6.5998	6.6023	7.0968	6.2172	6.3513	6.8156	7.9431	7.6883	8.2601	7.4322	7.8056	7.5293	7.5288	7.9424	7.2216	7.3771	7.8533	7.7582	7.7033	7.6731	7.6095	5.4299	5.4717	6.233	6.4578	6.031	6.2567	6.5808	6.0238	6.3297	6.1839	5.4221	5.3642	6.3276	5.8334
	957	16492	ENSMUSG00000042604	Kcna4	8.8355	8.7126	8.4994	8.6058	8.6717	8.4991	8.5455	8.6425	8.7894	8.7031	8.7424	8.8359	8.7955	8.7081	8.8955	8.7582	8.7183	8.8994	8.8308	8.6507	8.7504	8.1618	8.6799	8.722	8.614	8.668	8.9696	8.3645	8.8719	8.7698	8.5036	8.862	9.4663	9.0212	8.7576	9.1216	8.8185	9.1468	9.1317	9.2379	9.2899	9.4203	9.4787	9.3791	8.8833
	958	19791			12.256	14.0384	13.4126	11.9503	13.1155	13.6	12.5063	12.6391	12.4837	12.253	11.7671	14.2345	14.0963	11.9696	12.5475	13.2157	10.8463	12.2447	12.4244	11.1548	12.0744	11.092	10.5863	11.2924	12.4283	13.1116	11.8667	13.7664	12.4634	13.3055	13.8445	12.8274	11.2571	11.987	12.8508	11.6274	11.5266	13.3827	11.4312	13.0236	11.6105	12.046	13.2741	10.7944	11.5799
	959	20378	ENSMUSG00000027004	Frzb	7.5107	7.4074	7.0709	7.0621	6.7647	7.7455	7.6956	7.7388	7.6282	7.409	7.4211	7.3346	7.6951	7.403	7.1313	7.5535	9.1381	8.9471	8.412	8.9256	8.3024	7.4066	8.8436	8.7183	8.5706	8.0918	8.8638	8.8022	8.9712	8.6326	8.5636	8.8812	9.3545	9.4679	9.4877	9.1732	9.4455	9.1861	9.3241	9.1875	8.8367	9.4779	8.892	9.1798	9.2901
	960	109246	ENSMUSG00000030352	Tspan9	9.5339	9.3768	9.2787	9.2967	9.4021	9.0923	9.1656	9.041	9.2265	9.3191	9.2013	9.0824	9.0857	9.0919	9.0174	9.0206	9.5042	9.5851	9.7713	9.6493	9.6573	9.5401	9.699	9.6498	9.4891	9.8214	9.2883	9.7127	9.46	9.6666	9.7442	10.4779	9.9513	10.01	10.2301	9.9078	10.2929	9.8701	9.8765	10.1761	10.0724	9.7834	9.785	10.1766	10.0669
	961	77220	ENSMUSG00000049420	Tmem200a	7.6986	8.0126	8.2568	8.5386	7.8288	8.1709	8.0008	7.9695	7.8822	8.0225	8.2909	8.0802	8.5266	8.3826	8.2377	8.3415	8.3341	8.4542	8.1808	8.3324	8.0889	8.6186	8.5365	8.1062	7.8309	7.3271	8.8362	8.4074	8.2457	8.1983	7.9824	8.8173	9.0326	8.8085	9.0831	8.9281	8.7299	8.8537	8.8938	8.9284	9.1892	8.8625	9.0194	9.1238	8.7319
	962	67468	ENSMUSG00000003948	Mmd	10.2942	10.3329	10.5378	10.8789	10.4547	10.7408	10.5428	10.4894	10.6752	10.4443	10.7233	10.7942	10.7761	10.6184	10.72	10.8497	12.0633	12.0405	12.2423	12.0626	12.1913	12.1141	12.1342	12.1005	11.9557	11.8862	12.2543	11.9966	12.1802	11.9555	12.1526	12.8029	13.0748	13.1436	13.1657	13.0169	12.9157	13.1038	12.8798	12.9898	12.9786	13.0333	12.985	12.8905	12.8812
	963	14025	ENSMUSG00000000861	Bcl11a	8.7811	8.6736	8.772	9.0745	8.5984	8.718	8.4615	8.7423	8.3915	8.4545	8.6577	8.4082	8.5569	8.6876	8.3147	8.7949	9.8505	10.3995	9.953	10.1654	10.2422	9.6636	10.3624	10.0191	10.4525	10.0872	10.3158	10.3334	10.4402	10.2713	10.1927	11.0367	11.2256	11.2126	11.1281	11.2021	11.0657	11.1478	11.0868	11.1905	11.1523	11.1949	11.0876	11.178	11.1695
	964	227580	ENSMUSG00000049630	C1ql3	9.2358	8.8415	9.0292	8.8948	9.1273	8.9264	9.115	9.1433	9.1683	8.7561	9.0639	9.1369	9.2429	9.5121	9.2372	9.3603	11.3337	10.8139	11.1712	10.8486	10.569	10.774	10.72	10.5399	10.9843	10.3743	11.7816	10.4183	10.9523	10.8001	10.399	10.6915	11.1165	11.0899	10.8777	11.1135	10.659	10.8011	10.956	11.0626	11.1136	11.1036	10.509	10.9628	10.8286
	965	30805	ENSMUSG00000020334	Slc22a4	8.3218	8.1946	7.6535	8.2596	8.1246	8.1606	8.1356	8.1255	8.2502	8.2445	8.1854	8.139	8.1829	8.154	8.1172	8.1496	7.1232	6.3967	7.8355	6.7261	6.9251	7.5963	6.8578	7.5874	6.9093	7.1177	6.3613	6.7266	6.9354	7.5819	7.0505	7.888	6.6954	6.8869	6.8563	6.5248	6.8679	7.3621	7.0262	6.623	6.8591	6.7766	6.9223	7.4422	6.8766
	966	381290	ENSMUSG00000026463	Atp2b4	11.7329	11.5572	11.6792	12.0026	11.6468	11.6483	11.6884	11.7855	11.7092	11.6738	11.6582	11.8229	11.761	11.8031	11.6307	11.7229	13.2438	13.1335	13.4382	13.1737	12.9917	13.1394	13.2564	13.085	13.0333	12.9108	13.4172	12.9755	13.1084	13.0909	13.1619	10.6378	10.6696	11.1592	10.9906	11.0568	10.9053	11.3457	10.765	11.1679	10.7343	10.6503	10.2637	11.1123	10.4836
	967	68027	ENSMUSG00000024245	Tmem178	7.7613	7.9289	8.288	8.1172	7.9588	7.8768	7.9245	8.1725	7.8402	7.8246	7.8641	7.9076	7.7041	7.8268	7.9114	8.1776	10.1435	9.9785	9.5826	9.7882	9.3309	9.4051	9.6834	9.7338	9.5685	9.1427	9.8298	9.4612	10.0171	9.5611	9.8347	10.56	10.5507	10.5513	10.4797	10.5597	10.5886	10.4117	10.5859	10.5322	10.2867	10.5482	10.3579	10.2352	10.5295
	968	240025	ENSMUSG00000048826	Dact2	9.1871	8.7318	8.5805	8.6098	9.0086	8.4661	8.6816	8.6273	8.582	8.7298	8.5897	8.7033	8.6857	8.6158	8.5533	8.5381	9.568	9.7609	9.4996	9.9173	9.0611	9.0426	9.5199	9.5916	9.6253	9.4279	9.6321	9.5854	9.9829	9.6977	9.7268	8.9108	8.8654	8.5855	8.926	8.9391	9.0858	9.1092	8.9806	8.9885	8.7464	9.0535	8.72	8.8752	8.9846
	969	12444	ENSMUSG00000000184	Ccnd2	8.7836	8.7581	8.8368	8.5892	9.1076	9.0484	8.9399	8.9555	8.8803	8.6658	8.6905	8.7631	8.7569	8.8677	8.6341	8.8569	10.7314	10.3166	10.3345	10.6298	10.5333	10.4168	10.7033	10.6363	10.1324	10.361	10.2227	10.5956	10.5669	10.5603	10.2277	10.5152	10.7394	10.884	10.9588	10.7371	10.9452	10.6238	10.7314	10.7903	10.4435	10.6397	10.694	10.8416	10.9572
	970	67525	ENSMUSG00000041000	Trim62	9.2173	9.3223	9.1466	9.2992	9.3528	9.2556	8.9895	8.8646	9.1361	9.2916	9.0702	9.1328	8.9479	9.1287	8.9032	9.1536	9.3912	8.9796	9.4089	9.1443	8.9122	9.1064	9.1882	8.8021	9.2206	9.4397	9.149	9.1659	9.0085	9.4035	9.057	9.144	8.4123	8.3263	8.3607	8.1456	8.6328	8.1358	8.273	8.3455	8.3586	8.1908	7.6876	8.5191	8.2907
	971	14119	ENSMUSG00000024598	Fbn2	5.9098	6.1764	6.5594	7.1092	6.0407	6.3878	6.3556	6.9189	6.5889	6.5337	6.0357	6.3699	6.056	5.7848	6.4385	5.6825	4.9063	5.8321	6.0669	5.7796	6.7131	5.8256	4.9484	6.9466	5.8515	5.5079	5.4543	5.905	5.4078	6.1004	6.038	6.7309	7.196	6.9468	7.0207	6.9862	7.0497	7.0352	7.1055	6.914	7.1801	6.9245	7.2278	6.9981	7.1437
	972	54524	ENSMUSG00000027849	Syt6	9.3642	9.6323	9.3489	9.4278	9.2369	9.6791	9.5806	9.3985	9.4314	9.3879	9.5557	9.3719	9.6178	9.5919	9.57	9.8353	7.7731	7.8576	7.8592	7.1054	8.2306	8.0225	7.6517	7.9034	8.0912	8.2297	8.0983	7.8543	7.3021	7.3435	7.5234	6.9644	6.6018	7.1128	6.6926	6.6218	6.7326	7.2967	6.6258	6.8984	6.579	6.4116	6.549	6.8619	6.8581
	973	171286	ENSMUSG00000035506	Slc12a8	4.6298	4.2141	5.2899	4.5816	4.519	5.8876	4.4907	2	4.9184	5.0784	4.6394	4.0747	3.7136	4.7925	5.1627	3.9206	2.4243	4.9675	3.9398	3.9204	4.6111	4.2525	5.4203	5.0688	4.0936	5.21	4.2293	4.2412	4.9691	4.3698	3.6121	5.205	4.7438	4.8111	4.2296	4.3609	4.639	4.0451	4.6471	3.8443	4.8734	4.699	5.1091	4.6507	4.4543
	974	631990	ENSMUSG00000090546	Cdr1	8.2176	7.8258	7.6354	8.7868	7.4971	7.8768	7.7585	7.4777	7.8822	6.8935	7.4405	7.7551	8.1302	7.7838	8.2007	7.499	8.4571	9.2238	8.4279	7.8356	8.4625	8.614	8.6852	8.3239	9.1112	8.5128	8.2598	8.4945	8.2457	8.8039	8.7917	8.981	9.1179	8.9586	8.6529	9.3008	8.0319	9.3356	9.0424	8.5488	8.6151	9.2058	9.383	8.7902	8.7817
	975	73246	ENSMUSG00000029370	Rassf6	2.2536	4.0286	4.1193	4.5132	3.5325	4.3474	4.4034	3.9805	4.4996	4.0051	4.8283	5.2978	4.7787	4.7132	4.9416	3.4548	2	4.4368	3.8162	4.6259	4.1741	3.6764	4.2427	2	4.0936	3.9372	4.2293	4.4194	3.1795	4.3698	3.9367	4.3219	3.5625	3.5879	2.8293	3.6486	3.2062	4.2167	3.8608	4.3813	4.0048	3.3097	3.4162	3.956	3.3182
	976	320159			8.4637	8.2381	8.1964	8.0823	8.2965	8.3713	8.5556	8.2383	8.1246	8.3105	7.9343	8.063	8.1168	7.9659	7.8649	7.5101	7.8088	7.1983	7.3805	7.1054	7.4315	7.4895	6.9302	6.6954	6.8917	7.5898	7.1115	7.6729	7.2261	6.8256	7.6691	5.7958	5.2178	6.2521	5.3123	5.9461	6.0445	5.5465	5.741	5.8026	6.3636	5.3036	6.4103	5.989	6.0921
	977	69908	ENSMUSG00000003411	Rab3b	10.1444	10.3241	10.5635	10.0512	10.4779	10.4601	10.2587	9.9385	10.0106	10.2344	10.0927	10.1152	9.8716	9.9667	9.922	10.1145	10.2166	10.3472	10.0123	10.1793	9.8613	9.7502	10.273	9.9034	10.1783	10.0771	10.1533	10.3236	10.1895	10.0004	10.1158	9.9535	9.7423	9.8404	9.9143	9.7664	10.036	10.075	9.7214	9.9454	9.8975	9.7681	9.4632	9.7694	9.72
	978	243339	ENSMUSG00000043388	Tmem130	14.3017	14.3595	14.453	14.1623	14.4453	14.2733	14.2648	14.167	14.0887	14.2783	14.1414	14.2091	14.0926	14.1489	14.1175	14.2306	12.3005	12.2884	12.715	12.7233	12.5502	12.7045	12.5053	12.3967	12.7627	12.8379	12.7784	12.6983	12.4541	12.5821	12.6676	11.5675	11.5424	11.4421	11.6354	11.6218	11.7882	11.5476	11.5099	11.5963	11.671	11.5299	11.3904	11.6168	11.5457
	979	14255	ENSMUSG00000042817	Flt3	6.8321	7.2464	7.2321	7.2628	7.3818	6.8636	6.971	7.3195	7.3499	7.25	7.0429	7.4451	7.2027	7.4769	7.5782	7.4766	6.8936	6.6938	6.3605	5.5538	5.3136	5.5052	6.123	6.2321	6.874	6.3121	6.5773	6.2256	7.1459	6.206	6.3784	7.7518	7.1636	7.7254	7.3092	7.4004	7.1134	7.3893	7.3854	7.4724	7.1189	7.3919	7.042	6.7948	7.2536
	980	14411	ENSMUSG00000030109	Slc6a12	4.4385	3.926	3.6279	2	2.3956	4.9345	3.2142	3.9805	3.3111	3.3761	3.456	3.1406	3.7136	6.1129	3.5407	4.0475	3.7629	6.2216	6.3381	6.491	4.8213	6.8385	5.9938	4.7546	6.5554	5.5375	3.5082	5.5697	6.758	4.3698	5.206	4.1876	2.9832	5.1738	4.2881	4.8624	4.1854	5.0064	4.8184	3.9689	3.6366	4.0598	3.8569	5.0355	4.4543
	981	69635	ENSMUSG00000021559	Dapk1	10.6404	10.6519	10.5754	10.607	10.8435	10.6665	10.693	10.585	10.4049	10.7448	10.5018	10.5579	10.4505	10.6116	10.6232	10.4905	11.538	11.3351	11.1272	11.2912	11.0787	11.225	11.2974	11.1057	11.0852	11.0289	11.4082	11.3269	11.3169	11.2041	11.2053	11.6295	11.6044	11.7018	11.6951	11.9535	11.8124	11.5016	11.9442	11.7194	11.6022	11.9239	11.5155	11.5317	11.9525
	982	19739	ENSMUSG00000020599	Rgs9	9.9641	10.1488	10.1102	10.3727	9.9561	10.3378	10.1722	10.4193	10.1024	10.1296	10.1892	10.0401	10.1826	10.0797	10.1098	10.0534	8.9192	9.7285	9.0491	8.4747	9.536	9.483	8.8247	9.3613	9.8911	9.774	8.9906	9.1968	9.2167	8.9171	9.0402	8.6228	8.5813	8.4137	8.5157	8.4813	8.597	8.5145	8.4828	8.4928	8.5236	8.4568	8.3585	8.6246	8.5599
	983	17311	ENSMUSG00000019966	Kitl	8.5252	8.2646	8.3448	8.9082	8.1504	8.5937	7.7497	8.3355	8.6595	8.3072	8.5045	9.0652	8.4957	8.6103	9.6703	8.9492	9.8967	9.9577	9.7713	9.527	9.7177	9.9845	10.0895	10.0714	9.5768	9.4436	9.9161	9.7485	10.0241	10.015	9.8653	9.7481	9.1447	9.2065	9.2115	9.0681	8.6543	9.5772	8.7425	9.0742	8.9882	8.7982	9.1559	9.1594	8.7915
	984	208080	ENSMUSG00000086228	Ubap1l	8.0768	7.8187	7.1914	6.9885	7.8207	7.675	7.2465	7.8692	7.6587	7.5845	7.4112	7.1512	7.4158	7.2286	7.3039	7.2312	4.7683	5.7909	5.3862	4.6259	5.3136	5.977	5.316	4.8119	4.9817	4.7354	5.1288	6.02	4.5993	6.01	5.5606	4.8961	4.4319	3.7035	4.1686	4.0248	4.1854	5.0525	4.1446	4.5504	4.8734	4.4428	5.2604	4.8559	4.9832
	985	57780	ENSMUSG00000036578	Fxyd7	8.8548	8.773	8.5773	8.8881	9.1563	8.8895	8.6816	8.7648	8.6135	9.0505	8.7886	8.6638	8.4852	8.5374	8.8445	8.6221	9.2395	9.1236	8.9679	9.4103	9.0645	9.0529	9.1006	9.1661	9.6066	9.1159	9.0319	9.1628	9.5169	9.045	9.5717	8.774	8.3242	8.5435	8.537	8.7765	8.6463	8.857	8.8451	8.6639	8.4706	8.748	8.6045	8.5096	8.6908
	986	100628579			7.6218	10.0501	8.341	7.373	7.5072	8.326	8.8396	7.2007	8.6894	8.0651	7.4112	10.5958	10.4013	8.008	8.4363	8.7629	7.9189	7.6074	7.9054	7.2632	7.5542	7.4692	6.8391	6.9337	7.9027	8.564	7.4768	8.8992	7.6892	8.1409	8.9856	8.1084	6.7662	7.3706	8.187	7.1685	7.1211	8.6628	7.3486	7.944	7.621	7.3773	8.1515	6.7376	6.772
	987	13371	ENSMUSG00000007682	Dio2	8.081	7.9088	7.9793	8.3987	8.2849	8.6314	8.6769	8.9283	8.7866	8.4891	8.9966	8.2648	8.7306	8.5799	8.6061	8.2321	11.8538	11.4414	11.1288	11.1965	11.8291	11.6339	12.1096	11.7043	10.8132	11.0744	11.052	11.5609	11.2447	10.7857	11.1594	10.9158	10.9896	10.9916	11.216	11.0375	11.1287	11.0993	11.0181	11.1433	10.7404	10.8934	10.7397	10.8645	10.9755
	988	78801	ENSMUSG00000041323	Ak7	8.1411	8.4608	8.2803	7.4753	8.4708	8.0648	8.4507	7.7945	8.2898	8.1028	7.5519	8.001	7.982	7.9573	7.8883	7.8864	6.4726	5.9112	5.342	6.1139	5.6435	6.2863	5.0166	6.253	5.1086	6.346	4.4402	5.4102	5.3374	5.4114	6.0153	6.3922	5.9981	6.6481	5.8674	6.6218	6.8863	6.9886	6.5789	6.3527	6.7664	6.1621	7.4643	7.0302	6.8109
	989	58200	ENSMUSG00000022490	Ppp1r1a	8.6381	8.7877	9.0292	8.6621	9.0191	8.9682	9.0265	8.8594	8.5627	8.725	8.8074	8.6408	8.5962	8.8376	8.6706	8.5488	10.7453	10.7072	10.6598	10.7732	10.5519	10.5338	10.3608	10.8585	10.5839	10.6276	10.4558	10.5793	10.7184	10.581	10.631	10.0702	9.9961	10.0691	9.9038	10.0344	9.9016	10.2836	10.1019	10.074	10.3533	10.342	10.1689	9.974	10.1789
	990	270150	ENSMUSG00000070306	Ccdc153	7.4923	7.9021	8.1247	7.4663	8.5311	7.9016	8.2401	8.3981	7.8402	7.9206	7.4501	7.5723	7.6207	7.7092	7.644	7.4766	6.7172	6.0223	6.7123	6.682	6.3105	6.7572	3.6959	7.9804	4.3203	7.2665	5.9087	5.9921	6.1455	6.1647	7.4404	6.0874	5.9226	6.2896	6.0811	6.5248	6.6055	6.8651	6.5468	6.3062	6.8888	6.0001	6.7794	7.0196	6.7522
	991	240888	ENSMUSG00000040836	Gpr161	6.0834	6.8299	6.5205	6.681	7.487	7.0081	6.7231	6.4062	6.7105	7.094	6.5647	6.626	6.4492	6.4912	6.3956	6.6252	7.2583	6.3407	6.6772	6.3574	6.8311	6.3762	5.9938	5.4762	6.5775	6.8493	7.1268	6.76	6.6458	6.4998	6.2281	8.4206	8.6008	8.2851	8.6695	8.8749	9.2273	8.4685	8.6472	8.7832	8.8405	8.6603	8.2315	8.6403	8.818
	992	380654	ENSMUSG00000020014	Cfap54	7.5819	7.4725	7.5986	7.8526	7.3818	7.523	7.8439	7.8109	7.943	7.6522	7.2332	7.6666	7.9057	7.5754	7.5686	7.3468	7.7911	7.2295	6.8761	6.8899	7.1878	6.9452	6.6801	6.8541	6.6419	7.7374	7.5122	6.9017	6.8745	7.5581	7.4059	6.0297	6.3602	6.1334	6.4058	6.508	6.6166	7.0004	6.2993	6.183	6.7176	6.44	7.1133	6.6507	6.1078
	993	13446	ENSMUSG00000052301	Doc2a	9.4836	9.8299	9.4965	9.7729	9.5454	9.6791	9.3076	9.2328	9.3001	9.6188	9.4849	9.4765	9.5136	9.4462	9.4777	9.5194	9.4488	9.7635	9.5611	9.7751	9.6436	9.668	9.4415	9.5957	10.1117	9.671	10.1019	9.9377	9.9771	9.9557	9.6824	8.0944	7.9093	7.8931	8.3332	8.1374	8.3015	8.1411	8.1011	8.4507	8.2255	8.2115	7.8213	8.1634	8.2907
	994	11733	ENSMUSG00000031543	Ank1	10.992	10.9858	11.0307	11.2043	11.2433	11.1403	10.9781	11.3624	11.143	11.2149	10.9914	10.9429	10.9305	10.9336	10.8381	10.9547	10.677	10.4989	10.5812	10.5447	10.4593	10.3139	10.5905	10.5034	10.7391	10.3306	10.3747	10.606	10.3048	10.3506	10.293	11.1415	10.2958	10.1168	10.0705	10.2521	10.3941	10.2617	10.1694	10.4437	10.4646	10.1482	10.2804	10.1592	10.2372
	995	117229	ENSMUSG00000031027	Stk33	5.6026	6.4033	6.3681	6.5676	7.3033	6.2781	6.668	6.2394	6.8756	6.7296	6.5289	6.8434	6.7578	6.8193	6.1846	6.2025	5.1481	4.9675	5.8316	5.5538	4.4518	4.431	4.5491	5.4762	4.2114	3.4064	3.3078	4.5008	4.1006	4.2165	5.206	4.3219	4.5569	4.7586	5.1323	4.1602	4.639	4.1334	4.3817	4.5504	4.3837	4.995	5.224	4.8559	4.5494
	996	66930	ENSMUSG00000053111	Fank1	7.1768	7.1922	7.1831	6.5162	7.3262	7.1183	7.1425	6.4623	6.7105	6.8229	6.9097	6.8634	6.8746	6.9803	6.5407	6.3329	6.4946	6.5773	6.6593	6.2408	5.9119	7.3299	6.4031	6.8676	6.5775	6.5192	6.4853	6.8088	6.5082	6.9524	7.0393	5.9489	5.9981	5.6765	5.7885	5.7164	5.6742	6.1857	5.5271	5.5863	6.0849	5.6817	5.5519	6.4905	5.6737
	997	59012	ENSMUSG00000020000	Moxd1	5.8725	5.0497	5.3503	3.4125	5.5899	5.8876	4.7248	4.9115	4.8774	5.5408	5.145	5.1093	5.5138	6.1734	4.5294	4.2721	8.6314	8.2714	9.0143	8.4288	8.5634	8.7961	8.5538	8.1176	7.9458	8.3346	8.642	8.4283	8.4007	8.602	8.6731	7.0149	6.9522	7.5357	7.2142	7.56	7.5121	7.5977	7.0944	7.5442	7.0017	7.1813	6.8526	7.3175	7.2323
	998	208613	ENSMUSG00000043164	Tmem212	6.9172	7.0036	7.3177	6.7861	7.3818	6.8887	7.2958	6.6911	6.8651	7.094	6.086	6.7815	6.9372	6.6379	6.3513	6.6454	4.7683	4.9675	4.4363	5.8208	6.2391	4.5898	3.8532	5.5789	3.0631	6.5043	3.9824	4.5008	5.2248	4.6348	6.038	4.9385	5.554	5.4303	4.7295	5.7164	5.3168	6.1438	5.4248	5.3774	5.5294	5.3934	6.0647	6.0107	6.1078
	999	208898	ENSMUSG00000062151	Unc13c	10.8676	10.7472	11.0039	10.8772	10.8941	10.9961	11.0678	11.3326	11.333	11.2269	11.2665	11.3689	11.3241	11.2708	11.3002	11.3568	11.6261	11.6285	11.8461	11.3938	12.221	11.778	12.0232	11.5814	11.5957	11.9381	11.4338	11.7298	11.384	11.335	11.3154	10.1309	9.2595	9.5201	9.5231	9.6957	9.2345	9.9175	9.7124	9.9567	9.6773	9.1871	10.1701	9.5551	8.7915
	1000	225742	ENSMUSG00000025425	St8sia5	8.5131	7.6519	7.8176	7.9592	7.9218	8.0425	7.6394	8.0077	7.7579	7.9121	7.7124	8.1224	7.6111	7.6834	7.8249	7.7807	9.4823	9.5484	9.4432	9.5332	8.9274	8.4835	9.3782	9.0094	9.3988	8.9022	9.7726	9.4939	9.5069	9.3561	9.2715	9.8627	9.7246	9.5416	9.855	9.5747	9.7964	9.5086	9.6053	9.6683	9.6963	9.6086	9.6391	9.7045	9.6798
	1001	329274	ENSMUSG00000015484	Fam163a	6.9534	6.8719	6.8164	6.3692	7.0104	6.4226	6.4013	7.098	6.9267	7.0092	6.7475	7.1834	6.7922	6.8841	7.0083	6.7977	8.2969	7.8273	8.495	8.289	8.5037	8.1931	8.2126	7.5956	7.4781	7.6722	7.3906	8.1222	7.6389	7.9103	7.808	8.1631	8.4151	8.4009	8.5065	8.1209	8.267	8.4557	8.0447	8.2809	8.4359	7.5369	8.2406	8.3405	8.3968
	1002	16008	ENSMUSG00000039323	Igfbp2	7.1921	6.8012	6.5335	6.7716	7.0244	7.2009	6.9403	6.7028	7.0879	7.1163	6.8235	6.2226	6.314	8.0245	6.5007	6.2025	9.4573	9.7662	9.451	10.4478	9.4035	9.729	9.4661	9.7777	9.8531	9.7631	8.7147	9.7548	9.9345	9.4035	9.4261	8.375	8.717	8.5666	8.7156	8.8215	10.6177	8.4428	8.3401	8.5882	8.7424	8.3374	9.8416	9.2945	8.4956
	1003	195727	ENSMUSG00000059493	Nhs	8.2214	8.2273	8.2607	7.6123	8.0021	8.1399	8.1491	7.5701	8.1333	7.9866	8.1085	8.2724	8.4427	8.2056	8.1944	8.252	6.9585	7.2899	6.7295	7.1706	6.6594	6.5602	6.8391	5.9549	7.6339	7.1468	7.3257	7.003	6.811	6.4318	7.0505	5.3999	6.0127	6.0916	5.2548	6.2693	5.943	5.9385	5.6831	5.5469	5.6726	5.4221	5.4611	6.2838	5.3694
	1004	72500	ENSMUSG00000089762	Ier5l	7.6932	7.3191	6.8271	6.9502	6.8927	6.9377	7.2837	7.1244	7.0424	6.8139	7.0172	7.0323	7.0968	7.3581	6.8261	6.6252	8.4344	7.8475	8.1682	8.4421	7.7973	8.0705	8.2054	8.1457	8.9081	8.343	8.2104	8.3203	8.5982	8.6439	8.2199	7.6406	7.8657	7.739	7.9032	7.4673	7.8336	7.7866	7.635	8.0535	8.0063	7.98	7.4248	7.7103	7.7404
	1005	270049	ENSMUSG00000096914	Galntl6	7.3086	7.5435	7.9745	7.3438	7.659	8.2311	7.7672	8.0218	7.9529	7.7265	7.7903	8.0101	8.0259	7.9787	8.0356	7.8864	8.3094	7.9353	8.0149	7.6875	7.8857	7.8211	7.5404	6.9594	7.5692	7.5395	7.7183	7.8543	7.8623	7.4332	7.788	8.9188	8.9419	8.8085	8.9421	8.9328	8.7299	8.7317	8.7138	8.7489	8.8816	8.748	8.3834	8.8957	8.5853
	1006	667373	ENSMUSG00000079339	Ifit1bl1	5.9818	5.9336	6.3236	6.9109	6.3167	6.4226	6.4237	6.2868	6.3994	6.3578	6.3554	6.5036	6.5728	6.5721	6.6726	6.9189	6.0644	6.1582	5.429	5.9748	6.0009	5.7603	6.5711	6.3138	6.1752	5.7033	6.1071	5.8439	5.7163	5.1402	6.2082	5.7725	5.5739	6.0041	5.9782	5.829	6.2567	6.3788	5.952	6.3754	5.9508	5.9218	5.5519	6.4905	5.4206
	1007	18143	ENSMUSG00000026077	Npas2	6.2818	7.6439	7.8701	6.9759	8.5604	7.7455	7.7408	7.7159	7.6343	7.7457	7.8926	7.5601	7.4158	7.7092	7.6713	7.7436	10.0121	9.8133	9.6201	9.4271	10.0135	9.6725	9.957	9.6479	9.405	9.3042	9.8275	9.7402	9.6895	9.6868	9.4475	9.0504	9.0663	9.1516	9.2247	9.2435	9.3775	9.4561	8.9563	9.2955	9.5509	9.185	9.03	9.2945	8.9104
	1008	52906	ENSMUSG00000019986	Ahi1	14.1832	14.3085	14.3117	14.4364	14.2483	14.2599	14.3057	14.2248	14.241	14.2055	14.3494	14.3757	14.3575	14.3875	14.2565	14.3856	12.7016	12.3834	13.0975	12.6777	12.8361	13.2079	12.6687	12.6897	12.8026	12.9033	13.031	12.8924	12.5378	12.8077	13.0131	12.089	12.2428	12.2175	12.2536	12.2191	12.1816	12.2518	12.2898	12.2182	12.1723	12.2503	11.935	12.1899	12.0992
	1009	19279	ENSMUSG00000020151	Ptprr	8.258	8.3313	8.5741	8.2803	8.7157	8.3443	8.3137	8.2424	8.2976	8.404	8.4287	8.6291	8.5519	8.4299	8.5086	8.7348	8.3822	8.6398	8.7862	8.6678	9.0048	8.6047	8.6045	8.5557	8.6717	8.8764	9.0521	8.6851	8.5944	8.5508	8.6437	9.0382	8.5135	8.0918	8.4044	8.4963	8.3716	8.5389	8.6166	8.3106	8.3318	8.3929	8.3501	8.4943	8.213
	1010	212943	ENSMUSG00000032265	Fam46a	9.1348	9.096	9.2314	9.402	9.0674	9.2411	9.2145	9.1667	9.3883	9.1183	9.3577	9.4167	9.3096	9.5497	9.4064	9.3419	7.9431	7.7433	7.3249	7.7844	7.9241	7.6149	7.8515	8.0114	8.1806	7.9057	7.6458	7.5444	7.8623	7.4332	7.7745	7.0636	7.301	7.8435	7.3372	7.0972	7.3889	7.5977	7.1165	7.8499	7.4917	7.3098	7.7271	7.8609	7.5408
	1011	18481	ENSMUSG00000031284	Pak3	12.1584	12.1044	12.2793	12.5532	11.9645	12.2055	12.2513	12.342	12.5605	12.1887	12.5895	12.6518	12.7153	12.7248	12.5557	12.6629	11.8969	11.8026	11.8564	11.759	11.8993	11.9694	12.0164	11.8789	11.6963	11.7807	12.2473	11.7419	11.7193	11.693	11.7151	11.2994	11.8089	12.0121	11.7807	11.836	11.5541	11.7736	11.609	11.7485	11.7382	11.5237	11.5056	11.7478	11.4102
	1012	71584	ENSMUSG00000019359	Gdpd2	8.8973	9.1651	8.886	9.5796	8.7157	9.0595	8.9895	9.1085	8.8881	8.965	8.9086	8.934	9.0926	8.7804	8.9032	8.7904	8.6899	7.8872	8.2482	7.8946	8.6253	8.5234	7.8232	8.0417	8.0041	8.2874	8.1517	8.4541	7.7515	8.3942	8.5158	7.2436	7.2339	7.3706	7.2067	7.1028	7.1442	7.0467	7.1382	7.0186	7.5852	6.9543	6.8879	7.4221	7.136
	1013	20666	ENSMUSG00000063632	Sox11	8.9699	8.6932	8.6691	8.7831	8.7243	8.9264	8.7406	8.8088	8.9034	8.4487	8.8444	8.8461	8.9668	9.0821	8.5679	8.8351	9.9792	9.4359	9.3736	9.3448	9.7416	9.7119	9.4782	9.4224	9.549	9.3277	9.4154	9.4147	9.2697	9.4665	9.7597	8.3979	8.8451	9.1868	8.7315	8.6287	8.5689	9.1653	8.5533	8.8934	8.7981	8.4843	8.6186	8.6403	8.6698
	1014	12831	ENSMUSG00000026837	Col5a1	6.253	6.4595	5.0193	6.2691	5.9256	7.097	5.9865	6.2712	5.8831	5.8904	5.5548	5.1093	5.9383	6.538	5.907	5.5168	8.8439	8.8501	8.3631	8.0326	7.5444	8.3677	7.755	8.4193	8.5761	8.0255	7.4887	8.3753	8.5048	8.5746	8.587	8.2415	8.022	8.3397	8.0243	8.053	8.1542	8.2685	7.7664	8.1422	8.4003	7.4558	8.3289	8.2109	7.7201
	1015	16911	ENSMUSG00000028266	Lmo4	9.2486	9.6364	9.656	9.183	9.5839	9.7832	9.7649	9.4217	9.5206	9.6149	9.5909	9.577	9.6648	9.6622	9.5233	9.6401	11.1304	11.2407	11.0383	11.3022	11.0855	11.0197	10.9278	11.1689	11.1354	10.9278	11.5342	11.1809	11.4883	11.3483	11.0896	11.3024	11.4363	11.3972	11.489	11.3508	11.3255	11.3845	11.2976	11.3094	11.4092	11.461	11.2852	11.3494	11.3974
	1016	100861531			15.7563	17.4273	16.7491	15.4474	16.3962	16.9696	16.0203	15.9165	15.9431	15.6737	15.2216	17.6288	17.4386	15.3762	15.9631	16.5589	14.417	15.6145	15.6252	14.7229	15.4239	14.4762	14.0175	14.5054	15.9175	16.5221	15.1898	17.0632	15.77	16.7014	17.0341	16.043	14.7175	15.4251	16.1806	15.144	14.8965	16.7577	14.9033	16.3554	15.0551	15.5331	16.5773	14.4281	14.9587
	1017	14012	ENSMUSG00000032092	Mpzl2	2.6568	3.926	4.686	2	3.5325	5.6141	4.2111	2.8811	3.5383	4.0051	3.6013	3.7695	3.5627	6.0974	2.9669	2.7625	5.6584	6.369	5.7993	6.7688	5.8493	7.2488	5.5175	6.1002	6.2597	6.7642	4.9337	6.1264	6.54	5.2627	4.893	3.5849	4.3421	5.8114	5.4469	5.0131	5.4705	5.8104	5.1099	4.9025	4.9315	4.7899	4.1169	5.5007	4.802
	1018	71897	ENSMUSG00000026765	Lypd6b	8.1213	8.0917	7.9601	8.022	7.487	7.675	7.6956	7.3717	7.5906	7.8336	7.6883	7.8882	7.8084	7.7244	7.7922	7.9928	6.9899	7.5591	7.0509	7.4586	7.564	7.5869	7.081	7.2872	7.8123	7.1753	6.8227	7.6009	7.5246	7.389	7.3883	7.0346	7.2151	7.154	7.0548	7.2568	6.9916	7.0467	7.2621	7.0889	7.3602	7.0586	6.9336	7.2233	6.9038
	1019	231238	ENSMUSG00000029189	Sel1l3	7.3902	8.3562	7.9841	7.7598	8.3533	8.0425	8.3492	8.2897	8.2137	8.358	8.168	8.1715	8.2647	8.2625	8.5967	8.3476	9.0737	9.2506	8.8388	9.3198	8.1996	8.8002	9.0282	8.9209	9.0334	8.6814	9.0877	8.8535	9.3162	9.1703	9.4218	10.1592	10.1396	10.0839	10.1136	10.0344	10.2189	9.9268	9.9085	9.951	10.1647	9.7999	9.8446	10.1143	10.0689
	1020	225631	ENSMUSG00000045991	Onecut2	7.4861	7.8187	7.8015	8.6542	7.6132	7.675	7.7497	8.4195	8.226	7.8734	8.3538	8.3239	8.3988	8.154	8.3319	8.4198	4.9707	5.9112	5.7663	5.3437	5.4463	5.977	5.2035	5.7054	5.2802	3.5293	5.1288	4.4194	4.9691	4.8586	4.28	6.9121	7.5519	7.7592	7.3646	7.4365	7.1211	7.898	7.7311	7.3052	7.2157	7.2708	7.9381	7.5083	7.3022
	1021	277154	ENSMUSG00000075592	Nynrin	10.5801	10.7187	10.6923	10.8165	10.9975	10.6882	10.9085	10.4638	10.5969	10.7431	10.7173	10.5702	10.6081	10.6848	10.3539	10.5746	8.3462	8.4275	8.8506	8.5379	8.7632	9.0563	8.8008	8.5388	8.8728	9.402	8.3474	8.6981	8.8404	8.6626	9.0089	8.0803	7.8495	7.941	7.9583	7.6887	8.2208	7.8917	7.7095	7.8336	7.9227	7.5629	7.5253	8.0582	7.7504
	1022	56437			7.6825	8.1611	7.6233	7.3536	8.2494	8.3533	7.8355	7.8377	7.5715	8.0303	7.7204	7.5965	7.9057	7.9047	7.7922	7.3713	6.7543	6.9587	6.8605	7.1219	6.1895	7.2369	6.9125	6.7256	6.7035	6.7389	6.8599	6.8088	6.8239	6.9155	6.7669	4.3846	4.9093	4.3254	5.1323	4.398	4.8024	5.0064	4.5205	3.8443	3.77	4.1311	4.7488	3.956	5.2328
	1023	100017	ENSMUSG00000037295	Ldlrap1	6.6673	5.8238	6.1978	4.2863	6.0407	6.1174	5.8279	6.5557	5.5854	6.294	5.3644	6.0928	5.9687	5.8967	6.2342	5.9976	5.0914	6.1582	4.988	5.5538	4.6111	5.3362	5.9245	4.0992	6.0543	6.0082	4.9337	5.4102	6.3382	5.9626	5.9447	6.7784	6.3018	5.6187	6.0306	5.7164	6.2983	6.1007	6.4803	5.7688	6.0328	5.6086	6.3609	5.9999	6.2841
	1024	17179	ENSMUSG00000004933	Matk	11.2048	11.0709	10.7841	10.8129	11.2335	10.8245	10.8196	10.7765	10.6922	10.8033	10.7411	10.5471	10.7589	10.5784	10.6103	10.6503	11.8516	11.5041	11.5432	11.5778	11.5006	11.8694	11.3578	11.7241	11.9161	11.5194	11.2719	11.6282	11.4481	11.9884	11.737	11.4632	11.6116	11.3756	11.5111	11.5458	11.6316	11.3686	11.6326	11.5378	11.7407	11.7366	11.4521	11.5666	11.7465
	1025	22036	ENSMUSG00000032586	Traip	7.948	7.66	7.158	7.6841	7.566	7.7316	7.6771	7.778	7.437	7.4329	7.5785	7.4451	7.4484	7.6141	7.3609	7.5211	8.4683	8.1462	7.9355	7.3502	8.0546	8.5813	7.765	7.7937	8.2511	7.7875	7.8987	8.0963	7.1562	8.5508	8.4324	8.0897	8.2735	8.52	8.7341	8.1591	8.8585	8.5349	8.5081	8.4667	8.995	8.8172	8.7167	8.4789	8.8393
	1026	13555	ENSMUSG00000027490	E2f1	6.2087	5.4699	5.9275	5.4188	5.7675	5.9366	5.7593	6.1396	5.4241	5.8197	5.4436	5.1749	5.339	5.4105	5.996	5.1145	7.8691	7.6426	7.1438	7.8153	7.8462	7.7805	7.232	7.0926	7.8851	7.9001	7.4648	7.5153	7.9298	7.7589	7.5072	6.7429	6.4052	6.3965	6.8563	7.0162	7.1442	6.6423	6.9422	6.6419	6.9179	6.6243	6.6346	6.9316	6.616
	1027	331474	ENSMUSG00000049191	Rtl5	11.3968	11.277	11.3371	11.2795	11.3984	11.0911	11.2008	11.0973	11.1009	11.2299	11.0558	11.17	11.1515	11.1555	10.9848	11.1218	9.2525	9.3674	9.289	9.4404	9.7001	9.6182	9.4384	9.2148	9.628	9.5903	9.4431	9.4989	9.0142	9.3142	9.7425	8.1721	8.0075	8.1129	7.8652	8.05	7.9117	7.7311	7.7594	7.974	7.937	7.6805	8.1467	8.024	7.9157
	1028	12307	ENSMUSG00000028222	Calb1	11.6767	11.5806	11.7559	11.7884	11.4829	11.6774	11.6924	11.6617	11.8133	11.7444	11.9059	12.0509	12.072	11.956	12.1059	11.9323	11.6637	11.4263	11.8086	11.5497	11.4742	11.6882	11.4133	11.4644	11.1345	11.6318	11.8368	11.2707	11.5475	11.5633	11.5777	11.9758	11.5345	11.3553	11.1306	11.3963	11.0577	11.2837	11.1543	11.3479	11.465	11.4397	11.1459	11.1938	11.0566
	1029	56198	ENSMUSG00000032744	Heyl	9.1029	9.2204	9.0521	8.7575	9.2668	8.8644	9.1689	9.296	8.8958	8.9298	9.1402	8.976	8.978	9.1133	8.8365	9.2392	6.7543	7.3761	7.3696	7.5099	7.9241	7.837	7.7749	7.3173	7.5802	8.0868	7.2438	7.3602	7.2928	7.4845	7.7677	5.7958	6.4489	6.0702	6.7971	6.0543	5.7158	6.8125	6.1994	6.3977	5.9787	6.2608	6.0851	6.7311	5.9771
	1030	380785	ENSMUSG00000040867	Begain	11.9675	11.8707	11.3884	11.3968	11.8017	11.5534	11.5936	11.4678	11.3924	11.4935	11.4557	11.2214	11.3153	11.3466	11.2611	11.2691	11.6872	11.4195	11.6886	11.7098	11.6072	11.711	11.4691	11.5025	11.9441	11.751	11.4446	11.8253	11.8898	11.8027	11.863	11.2565	11.1487	11.1793	11.381	11.006	11.3339	11.1525	11.0657	11.4062	11.3892	11.258	11.1477	11.13	11.1732
	1031	102644	ENSMUSG00000032014	Oaf	5.3541	6.0108	5.7143	4.0168	5.4718	5.4884	5.6113	3.9014	5.9239	6.0378	6.2492	5.614	4.8456	5.3852	5.1105	5.5168	7.4954	7.0489	7.5258	7.5836	7.7032	7.7887	7.5404	7.4676	7.3427	8.0359	7.4768	7.8071	8.0169	7.6052	7.7677	7.4702	7.4319	7.2897	7.6589	7.0281	7.3564	7.8269	7.3203	7.4724	7.811	7.3552	7.3425	7.3895	7.5291
	1032	71870	ENSMUSG00000026546	Cfap45	6.7623	7.5607	7.9455	7.3139	7.6317	7.5068	7.5908	7.2573	7.2084	7.5951	6.8673	7.3771	7.4376	7.4218	7.2078	7.1487	5.9413	6.0223	7.0509	6.4653	6.4435	7.0851	5.9938	5.0688	6.4395	6.2598	6.3085	6.5655	6.3562	6.8519	6.7532	5.5165	5.4068	5.2893	5.4723	5.6717	6.3783	6.7855	5.6831	5.3774	6.1839	5.7052	6.2388	6.2015	6.044
	1033	57775	ENSMUSG00000051527	Usp29	11.5596	11.2619	11.4169	11.4942	11.2006	11.3981	11.271	11.3485	11.5209	11.3602	11.3885	11.6426	11.5972	11.6575	11.5594	11.6887	9.6709	9.7768	10.1354	9.9101	10.1784	10.3039	10.1323	9.7723	10.1022	9.9645	10.1939	10.1244	9.6537	9.9812	10.0276	8.4206	8.5739	9.0295	8.7679	8.7446	8.5228	8.9079	8.7389	8.6867	8.5837	8.5766	8.432	8.8134	8.5252
	1034	242050	ENSMUSG00000036334	Igsf10	8.6436	8.4236	8.4486	8.8677	8.2907	8.3168	8.6629	8.5516	8.7302	8.6632	8.5589	8.6173	8.6627	8.6455	8.4677	8.8612	6.308	6.4507	6.4875	6.3003	6.2633	6.2629	7.081	6.2321	6.6419	6.7132	6.2538	6.3184	5.6596	6.1647	6.3052	6.3922	5.9981	6.0702	5.848	6.1871	5.7362	6.0334	5.741	6.1307	6.1353	5.6086	5.8668	6.4194	5.9599
	1035	330953	ENSMUSG00000032338	Hcn4	7.7966	8.0188	7.9058	8.0645	8.1695	8.2013	7.8766	7.945	7.9725	8.0841	7.8423	7.9551	7.882	7.8868	8.0972	7.4879	7.0655	7.1004	6.9661	7.0886	7.2497	6.2629	7.5171	6.8265	7.6339	7.3186	8.0348	8.0015	6.8745	7.2178	7.2292	4.1876	4.5963	4.9107	4.2881	4.7807	4.5951	5.1404	4.5852	4.8386	5.1915	4.4978	5.4611	4.475	4.8401
	1036	75739	ENSMUSG00000057440	Mpp7	7.3836	7.0531	7.4478	7.1322	7.0383	6.9377	7.156	7.5573	7.7859	7.167	7.8053	7.7974	7.6768	7.8686	7.7839	7.7342	6.1502	6.4507	6.3381	6.1139	5.7154	6.215	6.6157	5.5789	6.5101	7.078	6.532	6.2727	6.8869	6.1004	6.1675	7.1654	6.5223	6.5434	6.5799	6.5902	7.24	6.9033	6.6103	6.2582	6.4256	6.7199	7.3677	6.4435	6.1078
	1037	270672	ENSMUSG00000031303	Map3k15	6.6117	6.5135	6.8482	5.5268	6.2465	7.1394	6.5712	6.76	6.3848	6.0686	6.7318	7.0844	6.4492	6.8567	6.3956	6.6252	5.0914	5.297	5.7663	4.9569	5.3592	5.977	4.8769	5.16	5.1681	4.3908	5.2457	5.08	4.4062	5.223	5.7924	5.0588	5.5135	5.3615	5.3402	5.478	6.2567	5.8886	5.7692	4.7718	5.3703	5.3934	6.0647	5.5606	5.289
	1038	12554	ENSMUSG00000031841	Cdh13	10.2853	10.5424	10.528	10.2728	10.6153	10.5825	10.5287	10.1436	10.2887	10.5292	10.4124	10.3885	10.4478	10.4344	10.5157	10.6491	10.14	9.6499	10.3965	10.1694	9.7133	10.1386	9.9241	9.7504	9.5518	10.112	9.7104	9.6846	10.3083	10.116	10.2339	8.932	9.0557	9.2944	9.2377	9.3346	9.4517	9.1308	9.2412	9.1353	9.3283	9.2058	8.7101	9.4231	9.0327
	1039	18389	ENSMUSG00000027584	Oprl1	10.8806	11.1455	11.1475	11.2789	11.1851	11.3044	11.1556	11.0034	11.0846	11.1823	11.1175	11.19	11.1556	11.0521	11.1515	11.1982	10.1135	9.8663	10.0017	10.0618	9.8068	10.0023	9.9955	9.2848	10.1305	10.0258	10.3341	10.2147	9.7736	9.8811	10.1939	9.5174	9.6139	9.8357	10	9.8647	9.9525	9.6045	9.7481	9.783	9.6816	9.9517	9.356	9.8794	9.8377
	1040	225743	ENSMUSG00000025427	Rnf165	8.9677	9.0077	8.946	9.5329	9.3612	9.1557	9.0697	9.3804	9.1274	9.081	8.9768	9.2478	9.0543	9.0642	8.9996	8.9411	11.2075	10.9687	10.8707	10.9794	10.8916	10.8407	11.1211	10.9144	11.0018	10.7543	10.8976	11.0669	10.7968	10.9229	10.7624	10.6569	10.7531	10.9491	10.8996	10.8894	10.984	10.8187	10.8604	11.0326	10.7805	10.8062	10.7301	10.8303	10.8672
	1041	432800			6.2384	5.6416	5.3795	4.1123	6.2703	5.4211	5.5718	5.9947	5.3954	5.3023	5.6581	5.9871	5.0295	5.3852	6.3736	5.0553	7.0801	6.9587	6.5076	6.5412	6.9845	6.5792	6.2698	5.021	7.0582	5.9653	7.4648	6.0473	6.6747	6.5648	6.2082	7.0921	7.2151	7.0377	6.8563	7.2568	7.1365	6.8779	7.0493	7.1295	7.1921	6.7542	6.2019	6.7569	6.7819
	1042	15208	ENSMUSG00000048001	Hes5	8.714	8.4562	8.129	8.0159	8.8754	8.7997	8.0447	8.4888	8.1202	8.136	8.781	8.0543	7.9746	8.5403	8.0356	8.5701	8.8986	8.4208	8.9859	9.2834	9.302	9.4236	9.0446	8.6918	9.096	9.3256	8.882	9.236	8.7	9.0926	9.3326	7.3098	7.196	6.5892	7.0548	7.2467	7.3695	7.5014	6.9173	7.2325	7.0936	7.1124	7.133	7.0925	7.3293
	1043	328778	ENSMUSG00000079657	Rab26	9.304	8.8832	8.6838	8.7201	8.6401	8.8833	8.7	8.6607	8.6041	8.9277	8.4906	8.7843	8.7038	8.5024	8.4468	8.5163	9.6538	9.6383	9.67	9.4568	9.4116	9.8339	9.312	9.366	9.8666	9.3529	9.3965	9.7569	9.5793	9.7458	9.7614	9.105	9.1953	9.2828	9.4271	9.2537	9.5135	9.5291	9.2735	9.4317	9.5275	9.3916	9.2196	9.6547	9.4153
	1044	70481	ENSMUSG00000054383	Pnma1	8.2761	7.7677	7.6535	8.1057	7.9067	7.8257	7.9859	7.7669	7.7859	7.5845	7.5608	7.5965	7.3013	7.7495	7.8249	7.9282	6.9743	6.5773	7.3135	7.233	7.083	6.9004	6.4031	7.0693	7.3297	7.1564	7.4282	7.1988	6.9708	7.0578	7.1268	5.8853	6.2656	5.911	6.6707	6.0887	6.1239	5.8104	6.0698	6.3977	6.65	6.2766	5.1867	6.4435	5.8522
	1045	14811	ENSMUSG00000059003	Grin2a	7.0487	6.4957	6.7619	6.4074	6.5287	6.9615	6.3556	7.357	6.6388	6.9191	6.6837	6.8231	6.7578	6.4551	6.4172	6.1749	8.7462	8.9658	8.4696	8.5502	8.2367	7.7639	8.6427	7.9424	8.195	7.7117	8.8638	8.3203	8.6317	8.3115	8.2736	9.6171	10.008	9.8373	9.9373	10.2104	10.0163	9.6668	10.3479	9.9865	9.3444	9.6905	9.5538	9.9377	10.1163
	1046	19672	ENSMUSG00000005973	Rcn1	10.0875	10.0286	10.2944	10.2	10.0258	9.899	10.0802	10.0732	10.0687	9.9756	10.2233	10.1984	10.2225	10.0925	10.0728	10.2658	8.9151	8.7352	9.3981	9.2908	9.5033	9.6342	8.61	9.0606	8.7172	9.355	9.068	8.9327	9.1411	9.2711	9.1566	8.0321	7.978	8.2475	8.1947	8.1319	8.1003	8.3117	7.8009	7.974	8.1961	7.9208	7.9549	8.0425	7.7252
	1047	68039	ENSMUSG00000025723	Nmb	5.9818	5.7656	5.2587	6.5844	6.3836	5.5526	5.9865	5.0645	5.4241	5.687	6.1815	5.4646	5.1926	5.3593	4.8168	5.6825	4.7683	5.565	5.1505	3.9204	5.3592	5.6564	5.2035	4.2727	5.0466	4.8341	3.9824	4.9699	5.2633	5.9383	5.6812	4.9798	5.0856	5.9814	5.3945	5.8822	5.4211	5.8104	5.1953	5.4217	5.0931	5.2724	5.8188	5.7004	5.609
	1048	16470	ENSMUSG00000045288	Ush1g	3.547	5.2327	4.8623	5.3421	4.4374	5.3506	4.573	2	4.8353	4.9184	4.768	4.0747	5.1402	4.6293	4.8168	4.1642	2	4.5399	4.5952	4.9569	4.8213	5.0926	5.4203	4.1886	4.5161	4.6834	4.6241	4.8507	5.015	4.8586	4.28	4.1876	4.2463	3.8105	4.5968	3.7087	3.6109	3.6251	4.5852	3.8443	4.4646	4.1311	4.528	4.7048	4.3525
	1049	74052	ENSMUSG00000032514	Ttc21a	7.2732	7.9486	7.8855	7.4016	7.9661	7.5857	8.2712	7.864	7.943	8.0067	7.2332	7.6202	7.6396	7.6087	6.9501	7.5642	5.9088	6.2824	5.342	5.3437	6.5846	6.4813	4.7223	6.6954	4.2114	6.9407	5.3007	6.1264	5.2633	5.8628	6.188	5.7725	5.4717	5.732	4.9266	5.9831	6.4904	6.2063	6.4803	6.3297	6.231	5.5316	6.6066	6.5801	6.5018
	1050	12297	ENSMUSG00000003352	Cacnb3	10.9461	10.8196	10.9622	10.5061	11.1162	10.8519	10.7181	10.7386	10.5341	10.9444	10.6002	10.6357	10.4572	10.6272	10.589	10.544	12.7992	12.5452	12.5492	12.7408	12.6122	12.3902	12.5458	12.5126	12.4317	12.4273	12.422	12.6915	12.6187	12.6153	12.3748	12.096	11.926	11.9817	12.1373	11.967	12.2041	11.8903	12.0774	12.1597	12.0501	12.1177	11.9556	12.0082	12.2392
	1051	381634	ENSMUSG00000070823	Gm1043	8.0309	8.2056	8.0674	8.2752	8.144	8.1606	8.3017	8.458	8.2542	8.291	7.9948	8.3876	8.0545	8.0809	8.3089	7.9282	8.5495	8.3727	8.224	7.9138	8.6113	8.2946	7.9765	8.7626	8.195	8.2251	8.0348	8.3536	8.0722	7.9834	8.1327	7.4036	7.4481	7.7458	7.2441	7.4716	7.2959	7.4593	7.4213	7.2693	7.2617	7.1896	6.9223	7.1762	7.4696
	1052	18553	ENSMUSG00000030513	Pcsk6	9.0027	8.9919	8.8551	8.701	8.9582	8.6754	9.0625	8.8034	8.978	9.0427	8.8149	8.876	8.8657	8.751	8.7324	8.682	8.3218	8.1624	8.52	8.4154	8.6713	8.7079	8.3244	8.3628	8.7072	8.9022	8.1666	8.5952	8.2601	8.3987	8.1274	9.7747	9.2884	9.1617	9.0197	8.9945	9.1705	9.1065	9.1181	8.9207	9.2099	8.8677	9.2605	9.1726	9.1681
	1053	77481			6.3649	7.225	6.2777	7.177	6.5867	6.3522	7.2714	6.4896	6.5372	6.9852	6.6673	6.4779	6.5924	6.4305	6.5796	6.1749	5.8416	4.9675	5.7663	4.8009	6.3105	6.8852	4.9484	6.1002	6.487	6.474	5.7197	5.905	5.7708	5.8101	6.1042	3.8744	4.3877	4.1733	2.8293	4.8357	4.2434	5.3016	4.228	4.1898	4.9874	3.5368	5.7692	4.9708	4.1245
	1054	240119	ENSMUSG00000024172	St6gal2	5.6476	5.7656	6.06	4.6468	6.1473	5.5526	5.2601	6.2069	6.0944	6.0686	5.0968	5.7494	5.8757	5.6206	5.9373	6.2025	6.9425	7.5218	7.6756	7.1706	7.0133	6.215	7.3555	7.8149	6.9606	7.0577	7.8716	6.8714	7.9594	7.5259	7.0727	5.928	6.8662	6.4471	6.2078	6.1333	6.1844	6.432	6.1786	6.1307	6.4457	6.5482	6.8042	6.2478	6.3516
	1055	245386	ENSMUSG00000036502	Tmem255a	11.5919	11.5995	11.8961	11.8277	11.4924	11.7732	11.6385	11.7968	11.8099	11.5913	11.8055	11.9302	11.872	11.923	11.8584	11.9719	10.3344	9.9223	10.41	10.007	10.1414	10.4828	10.3608	9.4986	9.9324	10.1412	10.1626	10.0985	9.8719	9.9871	10.0929	9.1372	9.1297	9.5435	9.4783	9.0362	9.2941	9.428	8.5971	9.2286	9.0187	8.9612	8.7522	9.5924	8.7817
	1056	11459	ENSMUSG00000031972	Acta1	6.4047	6.1985	6.0779	4.2863	6.4266	6.1593	6.0739	5.3589	5.8831	6.3578	6.2711	5.7494	5.7763	5.6206	5.9373	6.4058	6.8256	7.4173	7.3135	6.9469	7.1878	7.0446	6.5482	6.9466	6.9606	6.9518	6.8038	7.3383	7.2455	7.2379	7.0616	6.6565	6.5823	6.9468	6.0644	6.8257	6.3912	6.0786	6.7439	6.6788	6.8888	6.9345	6.2569	6.1634	6.4034
	1057	54120	ENSMUSG00000039131	Gipc2	5.8534	5.0976	5.1268	4.6468	3.9408	4.6115	4.4034	4.6464	4.3874	4.5328	5.047	5.0406	4.9708	4.4935	4.8805	4.2721	5.4485	5.6596	4.6686	5.286	5.1674	4.863	2.4576	2.8649	6.146	3.6426	4.6241	5.3674	5.5075	4.9587	4.9895	4.5579	2.8592	4.3254	2.979	3.2231	4.1854	2.3341	3.367	4.0836	2.929	3.6382	3.1322	3.5459	3.3182
	1058	217692	ENSMUSG00000042700	Sipa1l1	11.3504	11.2069	11.4509	11.3363	11.4649	11.4486	11.4915	11.451	11.4091	11.4286	11.4329	11.3135	11.4342	11.3859	11.2108	11.3849	13.6432	13.4793	13.5829	13.465	13.6414	13.2009	13.7138	13.4327	13.2013	13.4148	13.3681	13.467	13.4257	13.2801	13.2112	13.1049	13.2622	13.1818	13.1914	13.1141	13.2709	13.0054	13.2341	13.2217	13.1563	13.0505	13.1073	13.1591	13.2101
	1059	56808	ENSMUSG00000010066	Cacna2d2	11.5898	11.5652	11.4736	11.4758	11.6417	11.3805	11.4981	11.5397	11.4723	11.5716	11.3929	11.489	11.3625	11.5084	11.3354	11.3758	9.568	9.8564	9.9766	9.7882	10.0135	9.9791	10.0081	9.8115	10.6043	10.4791	9.6587	10.1066	9.6948	9.6158	10.1024	9.8696	9.3357	9.1388	8.926	9.2101	9.2363	8.9989	8.8083	8.8167	9.1438	8.8651	9.074	9.2152	8.8764
	1060	268729	ENSMUSG00000108841	Frmpd2	6.253	6.2419	6.9395	6.6173	6.846	6.6155	7.0158	6.1396	6.8334	7.025	6.2492	6.6722	6.1383	6.5944	6.0245	5.866	4.3515	5.1084	5.5111	5.7796	5.8809	5.3362	3.6959	6.123	3.2942	5.9434	2	5.2778	4.9218	4.9095	5.7379	4.6114	5.2178	5.732	4.2881	5.5455	5.4705	5.9138	5.7124	5.133	5.3703	4.4978	5.0687	5.8519	5.5867
	1061	546071			11.4541	11.3394	11.1384	11.2457	11.4211	11.3705	11.2818	11.0946	11.1235	11.3215	11.1932	11.0297	11.0336	11.0616	10.9527	11.0035	12.4557	12.4273	12.4221	12.5491	12.2264	12.0689	12.4919	12.296	12.4699	12.4101	12.6715	12.5233	12.4392	12.4204	12.286	13.041	13.0486	13.0116	13.1195	13.0832	13.2159	12.8712	13.2545	13.1275	13.0025	13.2164	12.983	12.9517	13.3463
	1062	77794	ENSMUSG00000036040	Adamtsl2	7.057	6.858	6.6341	6.7118	6.5089	6.6155	6.4457	6.7822	6.6388	6.7199	6.5469	6.3128	6.1648	6.3009	6.2096	6.3576	6.5377	6.5773	6.8761	7.0716	6.4852	6.4813	6.0918	6.253	6.874	6.9296	6.9138	6.989	6.7444	6.9884	6.2672	6.3614	6.1247	6.0485	5.9959	5.9461	6.2138	6.0334	6.2993	6.2824	6.0591	6.4951	6.489	5.531	6.3115
	1063	230971	ENSMUSG00000059208	Hnrnpm	8.8306	8.9103	8.9113	9.0355	9.0191	8.9916	8.8479	8.787	8.7216	8.8544	8.5633	8.3945	8.6298	8.6374	8.5386	8.4886	8.5548	8.0091	8.022	7.9698	8.1223	8.8042	7.735	7.5458	8.6352	8.2068	7.3906	8.6319	7.7447	8.2682	8.0678	6.5095	6.9522	7.0704	7.2218	7.1739	6.8018	6.9767	6.7858	7.6871	6.8289	7.0494	6.9336	7.4221	7.1813
	1064	13447	ENSMUSG00000020848	Doc2b	10.7845	10.832	10.8998	10.8558	10.7838	10.8709	10.8935	10.7598	10.7301	10.8666	10.8577	10.666	10.8665	10.6874	10.8189	10.7459	11.0093	10.4909	10.8765	10.5386	10.8779	10.6877	10.9443	10.1569	10.5757	10.8295	10.9241	10.6931	10.2792	10.5722	10.3373	11.5855	11.4233	11.3274	11.4499	11.4125	11.5001	11.0044	11.6516	11.4476	11.3411	11.4859	11.2792	11.202	11.5781
	1065	226075	ENSMUSG00000052942	Glis3	6.4812	6.0841	5.7143	5.8924	6.4887	6.554	5.9865	5.4169	6.1298	6.0063	5.5548	6.1263	5.8102	5.7652	5.967	6.1749	6.0935	6.5529	6.8128	6.7688	6.3785	6.598	6.0918	6.6801	5.8148	7.0577	6.2814	6.2957	6.0161	6.342	6.6388	6.9848	7.3479	7.2989	7.1045	7.4585	7.4394	6.8651	7.1165	6.914	6.3636	6.9245	6.662	6.7311	7.4757
	1066	30049	ENSMUSG00000025202	Scd3	7.2945	6.4223	6.7052	7.3536	6.3167	6.703	6.741	6.7822	6.6265	6.6806	6.8673	6.5538	7.055	6.4305	6.8581	6.8334	4.6157	6.3118	5.9244	6.0108	6.4005	6.5409	6.4283	4.7546	6.146	6.6738	6.0113	6.0742	6.1659	6.3604	6.1675	6.6565	6.0272	6.0265	5.7263	6.328	6.0114	6.6423	6.2993	6.525	6.3636	6.5219	6.6483	7.0874	6.537
	1067	78514			4.4887	5.9855	6.0233	5.1752	5.3432	5.6141	6.1564	5.7459	5.9439	5.7261	5.7851	5.1749	5.429	5.6206	6.0524	4.7907	8.4056	8.3301	8.3296	8.0843	8.0053	7.805	7.765	8.6373	8.3183	8.4284	8.0429	8.337	8.3789	8.3626	8.1948	7.4262	7.0965	6.8991	6.9225	6.8325	6.9044	6.8651	7.222	6.8984	7.273	7.198	6.6206	6.6438	6.6486
	1068	12728	ENSMUSG00000004317	Clcn5	8.862	8.4745	8.4928	8.7427	8.7286	8.5472	8.7715	8.5836	8.8699	8.7958	8.6865	8.8207	8.8413	8.95	8.9032	8.9451	6.5796	6.5773	6.0395	5.3991	6.6225	6.3979	6.1536	7.2146	6.4395	6.4586	6.7052	6.2494	6.1861	6.0783	6.7669	6.3614	6.3254	6.4471	5.848	5.6566	6.2282	5.9628	6.22	6.4838	5.7714	5.4779	6.458	5.7654	6.1987
	1069	74918	ENSMUSG00000026301	Iqca	6.9354	6.3646	6.8793	7.0621	7.7716	6.3156	6.7587	5.8122	6.6988	6.5985	5.9569	6.529	6.3832	6.3278	5.967	6.0592	3.7629	5.565	3.9398	5.3991	6.2633	5.1447	3.6959	6.1895	3.0631	6.187	2.453	5.1823	4.4735	4.6941	5.206	4.9798	4.2463	5.0038	4.5497	4.7524	5.2043	5.9138	5.2759	4.9637	5.6028	5.5834	5.9132	6.144	5.47
	1070	214253	ENSMUSG00000070644	Etnk2	8.1529	8.1779	7.8176	6.9885	7.8045	8.3168	7.8439	7.8	7.8402	7.954	7.647	7.4845	7.7659	7.7193	7.8806	7.7248	6.9585	6.6014	7.302	6.9836	6.1117	6.9886	6.1536	6.2735	7.4058	7.0163	7.0324	7.0169	7.1765	6.5806	7.005	4.5024	4.9402	5.5586	4.1686	4.4692	5.5646	4.635	4.4528	4.5504	5.0412	4.6019	5.1484	5.4382	4.8401
	1071	20491	ENSMUSG00000022372	Sla	3.8068	4.9486	5.8248	5.9962	5.8328	5.7844	5.2601	6.0323	5.9439	5.3533	6.0611	4.9684	5.7763	5.3593	6.3736	5.7211	7.7641	8.0707	7.8902	8.1177	7.8138	6.5409	7.8137	7.6038	7.7553	7.7374	7.7284	7.8697	7.6607	8.162	8.0057	7.0443	6.5223	6.6766	6.6147	6.6061	6.7921	6.9527	6.3184	6.75	7.3281	6.4951	6.1052	7.6252	6.616
	1072	244238	ENSMUSG00000048965	Mrgpre	9.4491	9.7173	9.6515	8.7831	9.6283	9.4746	9.5352	9.3565	9.4314	9.5833	9.5865	9.4797	9.5912	9.5822	9.2524	9.6198	8.1725	7.9447	8.1233	8.3676	7.9241	8.3175	8.3576	8.0595	8.195	8.2068	8.43	8.3753	8.2166	8.2436	8.3068	7.1654	7.1636	7.1232	7.6699	7.0688	7.2612	7.3251	7.4389	7.1559	6.9179	6.9738	7.0627	7.3687	7.0246
	1073	381269	ENSMUSG00000039395	Mreg	7.7866	7.0036	7.2794	7.6042	7.0793	7.097	7.1824	7.8429	7.0789	6.7199	7.0429	7.1182	7.3013	7.4093	7.5393	7.5852	5.5361	5.6596	5.8632	6.3003	6.1381	5.7933	5.5638	5.9549	6.2868	5.1345	6.1676	5.7471	5.4078	5.6397	5.6221	6.9437	6.5426	6.2521	6.9679	7.0222	6.7427	7.1666	6.5304	6.6419	6.6672	6.8205	6.2747	6.6507	6.7916
	1074	408066			7.4164	7.4263	7.7065	7.9463	7.487	6.9377	7.8188	7.8587	7.8078	7.7022	7.7204	7.4318	7.5219	7.4527	7.1313	7.606	5.2027	5.9862	5.8632	6.1467	6.4852	6.0055	5.1439	5.2868	5.9224	6.474	5.7197	5.7133	6.2257	6.4998	5.9686	5.1699	5.0292	5.4303	5.1639	5.9709	6.9311	5.699	5.1953	5.3317	5.3703	5.1404	6.7668	6.0941	5.1442
	1075	18383	ENSMUSG00000063727	Tnfrsf11b	5.2414	5.852	6.3386	6.2897	5.8005	6.2	4.9874	4.8284	6.0398	5.4961	5.7544	5.7918	6.1383	6.2596	5.7106	5.8311	5.3061	5.6131	5.6624	6.1467	5.7154	6.7403	5.3691	5.7054	4.7676	6.3791	5.6365	5.4517	5.5703	4.751	4.7895	5.0968	4.5569	5.3259	4.8116	4.2439	4.8777	3.3581	3.8608	3.9689	4.8128	4.4978	5.0687	4.9259	4.2988
	1076	214292	ENSMUSG00000085957	Syna	6.9888	6.5311	6.4669	6.3692	6.4053	6.1593	6.4457	6.0869	6.2787	6.5665	6.1815	6.6722	6.3832	6.4428	6.4596	6.2561	6.6402	6.94	6.5664	6.8103	6.9251	6.4609	6.6375	7.5373	7.1643	7.1753	6.9828	6.5272	6.9591	6.9884	6.7669	7.2436	7.7083	7.9112	7.7606	7.5802	7.6948	7.3621	7.3012	7.7051	7.1313	7.6982	7.6943	7.8904	7.5465
	1077	435684	ENSMUSG00000033256	Shf	8.052	8.3758	8.1117	8.5767	8.7709	8.1811	8.1888	8.5156	7.923	8.3704	8.1738	7.9457	8.0894	7.9787	8.0425	8.1282	8.6512	8.8451	8.8066	8.8279	8.9387	8.8754	8.61	9.228	8.9969	8.7044	8.8547	8.6182	8.8276	9.0249	9.0232	9.3228	8.5911	8.6191	8.9421	8.8667	9.0188	8.8763	8.8938	8.8495	8.8329	8.8677	8.4829	8.933	8.8992
	1078	387285	ENSMUSG00000032360	Hcrtr2	7.5761	7.5348	7.7463	8.5386	7.3927	8.02	7.8928	7.6689	8.0343	8.0841	7.7124	8.139	8.3068	7.9787	8.1755	8.1138	5.5361	5.4102	6.2211	5.7372	6.2391	5.7265	5.7752	4.8119	5.8874	5.8284	6.4853	6.0473	5.5075	5.0062	5.9204	5.5715	5.7236	6.0265	5.6833	5.6868	5.8712	5.2629	5.5597	5.9307	5.8935	5.8176	5.9132	5.6598	5.889
	1079	114142	ENSMUSG00000029563	Foxp2	8.552	8.728	8.0808	8.9378	8.6447	8.5313	8.4776	8.705	8.9187	8.6981	8.9533	9.0346	8.8817	9.0997	9.1591	9.0245	7.1373	7.6193	7.6577	7.885	8.2729	8.7464	8.1759	7.3944	8.7022	8.6747	7.9426	8.0361	7.8177	7.6433	8.0342	5.5442	5.2674	5.837	5.0331	5.3135	5.4705	5.7557	5.3146	5.6247	6.1353	5.3641	6.394	5.8638	4.9487
	1080	237761	ENSMUSG00000044352	Sowaha	8.8184	9.204	9.11	9.1692	9.394	9.4023	9.2711	9.1411	9.1098	9.0505	9.2681	9.0565	9.0995	9.4058	8.8122	9.0849	12.4884	11.7922	12.3019	12.1419	12.024	12.1324	12.1081	12.0776	11.641	12.0161	11.8501	12.0239	12.0178	11.9345	11.9462	12.1245	12.0559	12.1051	12.1356	12.0126	12.0408	11.8883	12.0945	12.1808	12.1662	12.1535	12.015	11.892	12.0385
	1081	328479			4.4385	3.5656	5.4082	2	2.9608	5.1982	4.3104	3.8178	4.1328	4.0674	4.2563	4.9684	2.7237	4.2342	4.9416	4.0475	5.6969	6.1582	6.5275	5.7372	6.4005	6.8226	5.3691	7.3563	5.9899	5.9434	5.2457	6.0473	6.1455	6.0559	6.4649	5.6244	6.241	6.0702	5.9782	5.9209	5.6314	6.7013	5.7124	6.0198	6.1103	5.6577	6.1052	6.0214	5.9599
	1082	230735	ENSMUSG00000028876	Epha10	9.927	9.9327	9.4472	9.6045	9.9171	9.7596	9.6391	9.8307	9.6913	9.6899	9.6146	9.6538	9.5136	9.6207	9.6128	9.6275	10.5836	10.8101	9.9892	10.3368	10.3786	9.7711	10.4513	10.4377	10.9434	10.2083	10.6903	10.5329	10.4444	10.4581	10.2824	9.6903	9.621	9.6839	9.6217	9.9904	9.7484	9.8442	9.9658	9.7936	10.1044	9.913	9.7262	9.9128	10.0231
	1083	23963	ENSMUSG00000016150	Tenm1	9.8522	9.911	9.8697	10.2984	9.8496	10.026	10.0784	10.2158	10.1353	10.1931	10.0008	9.6766	10.1181	10.1827	10.2186	10.1713	9.507	9.5108	9.7205	9.1361	9.0542	9.1228	9.4631	9.3149	9.2656	9.4669	9.7895	9.147	9.224	9.0335	9.2375	8.932	8.8573	9.1967	9.0664	8.8766	9.002	8.9692	9.025	9.0176	8.5746	8.7019	7.8867	8.9527	8.6777
	1084	16658	ENSMUSG00000074622	Mafb	7.3836	7.3785	7.4684	7.2732	7.3487	7.474	7.6489	7.5954	7.5779	7.3908	7.4112	7.2458	7.5721	7.1705	6.9795	7.1056	8.8309	8.6855	8.6659	8.843	8.7717	8.3949	8.8761	8.2635	9.0051	9.0635	8.9906	8.8418	9.1256	8.9898	9.0736	8.4684	8.6437	8.5931	8.6019	8.3879	8.5169	8.6849	8.431	8.8209	8.7864	8.5893	8.416	8.3168	8.4347
	1085	211651	ENSMUSG00000034023	Fancd2	4.838	6.5656	5.3503	6.2691	5.5899	5.4884	6.6107	5.445	5.6354	6.0988	5.723	5.5161	6.314	6.1435	5.3089	5.2788	6.0041	6.2523	6.6228	6.046	6.0009	7.3411	4.9484	6.7984	5.2252	6.3953	5.7197	6.2494	6.6164	5.4114	6.4136	6.0297	6.2285	6.4136	6.3656	6.0773	6.2282	6.3606	6.0922	5.7688	6.579	6.5086	5.3972	6.2295	6.0109
	1086	69137	ENSMUSG00000031937	Vstm5	8.0309	7.9486	8.1757	8.022	7.7464	7.9382	7.8103	7.8847	7.7969	8.2241	8.1504	7.9076	8.1436	7.6304	7.6713	8.0317	7.0053	7.677	7.2067	7.3781	7.8138	7.5869	7.7146	7.2566	7.6653	7.5827	7.4768	7.7416	7.2835	7.5095	7.6691	7.2521	7.1304	7.3262	7.0548	7.0802	7.4762	7.1771	6.8791	7.22	7.5013	7.3847	7.2819	7.2463	7.1283
	1087	69291			3.9572	6.0108	6.3236	6.1162	5.5123	5.6141	6.0739	5.7459	5.9636	6.0378	6.0099	6.2833	5.706	5.6844	5.8445	6.0592	7.611	6.9587	7.8513	6.9469	6.6411	7.6332	6.9992	7.5029	6.2321	6.8374	6.7052	6.6923	7.0501	7.1768	7.8407	6.4373	7.2339	7.3081	6.7768	6.9801	6.4166	6.6423	6.8131	6.7148	6.9463	7.0586	7.3082	7.3687	6.7522
	1088	68527	ENSMUSG00000026668	Ucma	3.7253	5.2327	5.1268	5.1752	4.6697	4.7274	5.402	3.6343	5.0347	5.2495	5.1916	5.614	4.6348	4.9391	3.9501	4.8615	5.2027	2.8501	5.4706	4.4268	4.885	3.5274	4.1242	4.3522	5.2802	5.677	5.4543	5.132	4.9691	4.3698	4.9421	5.5442	4.5569	5.1738	4.8116	4.9144	5.0502	5.5465	5.0191	5.8357	5.6726	5.1054	5.9801	5.7654	5.8522
	1089	69239	ENSMUSG00000024227	Pdzph1	7.0147	6.3646	6.9783	5.9962	6.8301	6.8636	7.1153	7.2809	6.9064	7.0561	6.8957	6.4516	7.0265	7.0138	6.7256	7.0909	5.8068	6.1903	5.0442	5.5041	5.5678	6.1904	6.2129	7.1494	4.8426	3.9372	5.1884	5.2778	5.7438	4.751	4.28	4.9385	4.4747	4.2514	4.8116	4.398	4.1854	4.4409	4.3817	5.133	3.8922	3.733	3.7587	3.7655	4.243
	1090	381284	ENSMUSG00000084989	Crocc2	6.6997	7.2884	7.1996	6.9373	7.0521	7.0752	7.5709	7.1417	6.8334	7.131	6.5289	6.8634	6.8746	6.8287	6.4803	6.1749	5.3551	4.6362	6.2691	5.0977	6.1895	6.4192	3.995	6.7405	5.1681	6.4273	4.9337	5.9921	5.3374	6.3786	6.3423	4.7607	4.7083	5.3963	4.4507	5.294	5.4705	6.0561	5.4597	5.4646	5.6726	4.8755	5.2604	5.9221	5.3952
	1091	207393	ENSMUSG00000043460	Elfn2	10.5375	10.6378	10.6457	10.5214	10.955	10.6774	10.5843	10.6828	10.6227	10.8084	10.5327	10.4311	10.6391	10.6122	10.6009	10.5812	11.7291	11.3107	11.4739	11.3487	11.3618	11.2333	11.4623	11.2817	11.4954	11.3747	11.4469	11.4867	11.3536	11.3009	11.3975	11.3699	11.3615	11.337	11.5742	11.3098	11.7122	11.1864	11.5161	11.5842	11.384	11.3856	11.2059	11.4976	11.6249
	1092	13603	ENSMUSG00000026525	Opn3	6.9623	7.1473	7.0619	6.5335	7.2324	6.7585	6.9557	6.5296	7.1146	7.3093	7.0681	6.9219	7.0968	7.0055	6.7599	6.9022	7.3089	6.3407	6.6043	6.491	5.817	6.3979	6.0599	5.9293	6.487	5.8521	6.5088	6.5465	6.9114	6.4491	6.4981	6.1429	5.0856	4.5272	5.4209	5.2742	5.5183	4.806	4.6471	5.0787	4.7496	4.6512	4.9402	5.1176	4.6386
	1093	11548	ENSMUSG00000050541	Adra1b	8.2544	8.4189	8.3186	7.8176	8.1884	8.4408	8.0804	8.1683	8.2976	8.469	8.084	7.8784	8.2022	8.065	8.4468	8.1914	7.8606	8.062	7.6213	8.4288	7.5737	7.9066	7.7248	7.4223	8.4499	8.1552	7.2717	8.0698	8.3745	7.9473	7.9163	6.5235	6.3602	6.4471	6.3792	6.3087	6.7627	6.4145	6.1575	6.1037	6.8135	6.3532	6.6206	6.1634	6.044
	1094	70426			7.2072	7.9552	8.0897	8.0704	8.0162	8.1082	8.0156	7.4709	7.622	7.8864	7.9682	7.8882	7.8498	7.8126	7.9416	8.0162	7.1651	7.8576	7.7366	8.2136	7.6213	7.1503	7.9064	7.6905	7.9627	7.7689	7.8897	7.8697	7.6018	7.5095	7.9824	6.4666	6.512	6.3261	6.7353	6.8659	6.9222	5.9867	6.7995	6.5045	6.579	6.6609	6.2019	6.3189	6.8109
	1095	70598	ENSMUSG00000034898	Filip1	6.689	7.2884	7.3986	6.7118	7.1322	6.6155	7.3079	7.498	6.7336	7.3724	6.9097	7.0499	6.8422	6.5148	7.1701	6.8682	9.0846	9.6528	9.627	9.5939	9.7001	8.9358	9.5887	9.6498	9.4744	9.2803	9.9702	9.236	9.4579	9.541	9.3047	7.6723	7.963	7.5279	7.6081	7.5186	7.3365	7.6807	7.8009	7.6316	7.715	7.7501	7.591	7.4462	7.7948
	1096	18186	ENSMUSG00000025810	Nrp1	9.6951	9.696	9.899	9.9204	9.7261	9.813	9.7428	10.0074	10.0142	9.78	9.6568	10.0489	9.9459	10.0182	9.9163	10.074	9.2908	9.2807	9.0628	9.1031	9.2485	9.4703	8.7616	9.0928	9.0883	9.0862	8.3861	9.1215	8.9179	9.1651	9.0031	10.794	11.2567	11.4026	11.2564	11.2396	11.0693	11.1492	11.1788	11.1744	10.8678	11.2042	11.1549	11.2134	11.1577
	1097	232441	ENSMUSG00000030222	Rerg	8.4511	8.5711	8.4242	8.459	8.5063	8.4238	8.6676	7.8898	8.4797	8.4862	8.5722	8.5694	8.658	8.6614	8.2558	8.7582	7.8691	7.8273	7.8275	7.4455	7.8219	8.3118	7.8515	7.385	7.7746	8.3133	8.174	8.0154	7.3476	7.7932	8.0455	8.3633	8.8078	9.1592	8.8382	8.8198	8.8304	8.9662	8.6547	8.498	7.9721	8.9489	8.4868	8.4633	8.9392
	1098	14555	ENSMUSG00000023019	Gpd1	8.9112	8.7767	8.8911	8.8539	9.1972	9.1296	9.0908	9.3877	9.2387	8.8522	9.3475	8.3876	8.9892	8.8141	8.7194	8.9573	10.7045	10.302	10.2248	10.3026	10.2483	10.3153	10.4436	10.3996	10.4223	10.3232	10.5454	10.4584	10.3503	10.4268	10.5492	11.6152	11.4665	11.3859	11.5422	11.5682	11.7316	11.3165	11.6972	11.6514	11.631	11.8043	11.4209	11.5251	11.7637
	1099	210622	ENSMUSG00000027188	Pamr1	7.1061	7.4074	7.3102	7.2937	7.3262	6.6452	7.3199	7.6387	7.2084	7.6573	7.0172	7.1182	7.0408	7.4465	7.2446	6.6454	8.2779	8.9887	7.6487	8.544	7.9616	7.7131	8.7162	8.7145	8.2984	8.3679	8.4113	8.6091	8.9149	8.625	8.5117	7.4702	7.1438	7.6767	7.3714	7.4365	7.5643	7.6807	7.7524	7.317	7.9011	7.37	6.8762	7.6701	7.5523
	1100	26380	ENSMUSG00000021255	Esrrb	6.0504	5.8797	5.8034	4.935	5.8005	4.3474	5.5312	6.0323	5.2744	5.8555	5.7544	5.4646	4.9096	5.5765	5.9373	5.4263	5.578	5.5152	5.4706	5.7372	5.6062	5.1447	4.5491	5.1151	5.3331	4.9706	5.5931	4.8507	4.6583	5.5781	5.5288	5.928	5.7413	4.958	5.3123	5.4952	6.0607	5.2629	6.1143	5.961	5.5665	5.3036	5.1867	5.4221	5.0498
	1101	20349	ENSMUSG00000063531	Sema3e	7.2732	7.2884	7.4339	7.8457	6.9528	7.2789	7.2339	7.0346	7.7179	7.4447	7.4597	7.7869	7.7309	7.9092	7.2686	7.4191	7.927	8.2937	8.3125	7.6986	8.3082	7.9801	8.3772	7.6359	8.4559	8.4125	8.4051	8.0361	8.5444	8.0128	7.9407	10.422	10.74	10.7866	10.8688	10.8102	10.6429	10.8112	10.5799	10.7453	10.4017	10.6534	10.7888	10.6733	10.557
	1102	21847	ENSMUSG00000037465	Klf10	7.1614	7.0286	6.773	6.9242	7.1832	6.8636	6.9557	6.6433	6.9166	6.2677	6.9911	7.276	6.8585	7.1555	7.1181	7.0909	9.8505	9.4755	9.7205	9.7646	9.0226	8.7464	9.8768	9.5998	9.9021	9.3529	9.5206	9.689	9.5387	9.4537	9.2521	9.0862	9.3983	9.1103	9.2995	9.1812	9.1667	9.09	9.1263	9.3595	8.9847	9.112	9.0007	9.2757	9.2447
	1103	226250	ENSMUSG00000025083	Afap1l2	7.8884	8.1441	8.4994	7.8387	8.3589	8.0866	7.9245	8.045	8.1888	7.8907	7.9882	8.0888	8.1235	8.1275	7.7416	7.9446	8.1238	8.018	8.0079	8.1585	8.5388	8.3061	8.0186	8.294	8.1216	7.7627	7.4648	8.3315	7.765	7.9715	8.0952	8.5077	7.8535	7.8435	8.1361	8.1237	8.0963	8.0589	8.2828	7.8418	7.9011	8.1612	8.1991	7.9049	8.2238
	1104	18124	ENSMUSG00000028341	Nr4a3	5.7947	5.9855	5.9858	5.1302	6.2465	6.838	6.0163	6.476	6.3252	6.2273	5.2806	5.8732	6.1648	6.0498	6.3286	5.3297	8.3523	7.6542	7.8114	7.7421	7.4942	7.2488	8.2485	6.9077	7.9959	6.9844	7.7384	7.9444	7.5006	7.9041	7.6691	8.7914	9.0785	9.1818	9.2942	9.0695	9.4806	9.0678	9.0567	9.0212	8.5973	8.9685	8.6969	9.1139	9.2746
	1105	224697	ENSMUSG00000024299	Adamts10	9.581	9.302	8.7385	9.1183	8.844	9.2652	8.9515	9.0908	8.7949	8.85	8.4189	8.8461	8.8039	8.7974	8.7833	8.5595	9.0214	8.9978	8.9751	8.7554	9.0084	9.2201	8.4953	9.0517	9.3832	8.7398	8.4785	8.7941	9.0965	9.3142	9.2715	9.3486	8.6693	8.2851	8.491	8.3364	8.4445	8.6138	8.2332	8.3569	8.547	8.3374	8.3374	8.5153	8.4502
	1106	110333			7.6716	7.4542	7.3328	7.5108	7.4666	7.2404	7.0305	7.4222	7.7914	7.4388	7.5249	7.5601	7.5819	7.5528	7.372	7.5101	5.1481	5.8321	5.7663	5.286	6.4435	6.1399	4.454	6.5172	5.8148	6.0904	6.1071	5.9636	5.7973	6.2659	6.4309	4.9385	4.9402	4.7586	3.9683	5.3889	4.9492	4.806	5.1099	5.1853	5.3703	4.7452	5.0271	4.8559	4.4543
	1107	16477	ENSMUSG00000052837	Junb	8.5342	8.3999	7.7797	7.6042	8.1758	8.1811	8.1953	7.5828	7.9578	8.0381	7.9882	8.2267	8.5468	7.9443	8.0972	8.1637	10.1915	9.5453	9.7226	10.0575	9.2725	9.3339	9.8444	9.5585	10.4585	9.8586	9.6507	9.8197	10.1138	9.8125	9.9666	9.7555	9.7257	9.4515	9.8502	9.4315	9.8993	9.6742	9.2337	10.0548	10.0198	9.7806	9.731	9.6495	9.7136
	1108	18552	ENSMUSG00000024713	Pcsk5	7.7664	8.0678	7.7351	7.9972	7.7548	8.2506	7.8439	8.0902	8.025	7.9036	7.7674	8.1141	7.9444	8.0122	7.6531	7.8078	7.5172	7.6656	8.1619	8.1423	7.6213	8.2888	7.735	8.0477	7.9458	8.2831	8.2805	7.7582	8.3343	7.7379	7.7051	8.0173	8.2178	8.5121	8.1361	8.0088	8.2208	8.1517	8.2482	8.2382	8.2824	8.1612	7.6193	8.173	8.0958
	1109	381738	ENSMUSG00000073102	Drc1	8.3253	8.6375	8.3485	8.7239	8.7541	8.5472	8.5556	8.6364	8.3951	8.4805	8.2363	8.5006	8.5618	8.5631	8.3319	8.466	9.0328	8.7728	9.0318	8.9209	8.8773	8.7673	8.2126	8.5724	8.6087	8.6546	8.9906	9.0319	8.8308	8.8567	8.8762	7.6973	7.7262	7.3966	7.3162	7.4759	7.6896	7.4421	7.7382	7.7318	7.7558	7.5948	7.4487	7.8519	7.8932
	1110	56485	ENSMUSG00000028976	Slc2a5	6.9444	6.5311	7.1914	7.1322	6.9962	7.0532	6.4457	6.8679	6.47	6.6905	6.4351	6.3416	6.5924	6.4428	6.3513	6.2295	6.9585	7.5344	6.9367	7.336	7.366	7.0028	7.2176	6.8125	6.7235	6.789	6.8227	7.2349	7.2646	7.6731	6.934	6.5915	6.9748	6.4636	6.9132	6.4995	6.8771	6.2855	6.5304	6.7148	6.8888	6.7877	6.8762	6.8499	7.2034
	1111	140709	ENSMUSG00000004415	Col26a1	6.4936	6.5311	6.4394	7.2098	6.0681	6.0743	6.4674	6.6674	6.4138	6.3578	6.4351	6.3699	6.1907	6.0335	6.4172	5.9976	6.2573	6.7594	6.7295	6.5656	6.3562	6.7233	7.0159	6.4823	7.5015	6.7261	6.8961	6.856	6.4087	7.0801	7.1891	4.8073	5.4717	5.6479	5.7473	4.7807	5.1447	5.4465	5.389	5.2845	5.7063	5.2079	5.1091	5.2509	5.609
	1112	238076	ENSMUSG00000043673	Kcns3	7.1142	6.742	6.6819	7.439	5.9552	6.7585	6.7587	6.5427	7.2002	6.8229	7.2771	6.3699	6.4916	7.0384	6.2584	6.5197	6.4946	5.6596	6.0938	6.1139	4.6846	4.7329	4.8769	6.3911	4.5161	5.9211	5.7595	5.4921	6.0822	5.9135	5.652	7.7696	7.8936	7.6696	7.6644	7.851	7.9295	7.4334	7.8009	7.5935	8.0659	7.5369	7.9212	7.7591	7.6891
	1113	27279	ENSMUSG00000023905	Tnfrsf12a	7.5288	6.4223	6.9687	7.1322	7.1579	6.4226	6.4457	7.1417	6.7676	6.6504	7.0042	6.1912	6.4705	6.6698	6.5796	6.3819	4.2514	5.0397	4.2577	5.2259	5.2178	5.9183	5.6521	4.3522	6.3395	6.0082	5.7197	5.9921	4.7695	5.4114	5.8957	6.0099	5.3154	5.759	5.2251	5.9709	6.1083	5.6094	5.9273	5.2358	5.5294	5.6817	6.6066	5.2868	5.3431
	1114	225872	ENSMUSG00000045903	Npas4	6.6003	6.991	6.0779	7.7598	6.4266	5.984	5.9562	6.3772	6.1811	6.4543	5.8447	5.7918	6.2163	5.9145	6.0245	5.9976	8.3094	7.7216	7.455	7.4586	7.3434	7.4692	7.9765	7.3073	8.0203	6.0082	7.5238	8.154	7.7379	7.0912	8.1221	6.7309	6.9673	6.6189	6.8563	6.2891	7.5062	6.9648	5.9021	6.565	6.7176	6.9043	7.4643	6.9485	7.2107
	1115	26561	ENSMUSG00000029061	Mmp23	6.0335	6.3449	4.4852	7.0135	5.3873	5.2764	5.402	5.4997	5.4241	5.1665	5.4816	5.1749	5.1926	5.4354	5.0564	5.6021	5.6584	4.7264	3.9398	5.4526	4.6111	5.6919	4.454	3.7923	5.0466	4.9706	3.3078	4.9115	5.3374	4.9095	4.4252	5.3692	4.0333	5.1332	4.5968	4.6641	4.8024	3.951	4.5852	4.9637	4.2979	4.6019	5.1091	4.4113	5.4455
	1116	21924	ENSMUSG00000091898	Tnnc1	6.0504	5.9336	6.1813	6.3692	6.3617	5.1156	5.6113	4.8284	5.6598	5.5186	5.9837	5.5659	5.6696	5.531	6.1332	5.2261	4.7683	5.1741	4.988	5.2259	5.2665	5.3803	5.3691	5.6435	5.4335	5.0952	5.7197	5.9346	6.3739	5.5137	5.8957	4.5579	4.4747	3.9101	4.8509	5.06	5.1139	5.3392	4.6471	5.0787	4.3837	4.8333	4.3371	4.9485	5.0498
	1117	243274	ENSMUSG00000034310	Tmem132d	8.1174	8.121	8.3958	7.6526	8.4554	8.0866	7.9555	8.2343	7.7237	8.3392	7.8203	7.9076	8.0963	8.0163	8.0215	7.8433	8.9633	9.4949	8.9966	9.3377	8.8295	8.543	8.9948	9.1523	9.1188	8.641	9.1824	9.0557	9.0669	9.1386	8.8083	7.373	7.5009	7.4137	7.6309	7.6002	7.7953	7.5504	7.5239	7.5139	7.621	7.2787	7.3677	7.3132	7.4997
	1118	619309			5.6026	5.1441	4.4303	4.7691	3.5325	4.9345	5.1028	5.2673	4.9184	5.328	4.6394	4.4376	5.2431	4.6293	4.6802	4.2721	4.9063	6.2523	6.6228	6.1139	6.5258	7.0308	5.7353	5.6435	6.2868	6.1682	5.3007	6.5076	6.2257	6.9402	6.3961	6.2309	5.7058	6.308	5.4974	5.7878	5.9946	6.2063	6.0238	6.4197	6.874	6.3382	6.549	6.5945	6.1839
	1119	19883	ENSMUSG00000032238	Rora	7.4923	7.6029	7.5479	7.439	7.7799	8.0537	7.4454	7.778	7.7004	7.7168	7.6046	7.992	7.4804	7.6032	7.9638	7.6567	8.0212	7.9447	7.4858	8.0672	7.4315	7.0028	8.6373	7.7207	7.3809	7.9449	7.6351	7.8387	7.8497	7.534	7.7609	7.8771	7.0896	7.2331	6.9499	6.9617	7.1134	7.2079	7.1165	7.4405	6.701	6.5086	7.4168	6.8855	7.1738
	1120	74012	ENSMUSG00000036894	Rap2b	9.5896	9.7589	9.659	9.3442	9.9264	9.6353	9.6769	9.7184	9.5272	9.675	9.7629	9.7457	9.5936	9.7751	9.5554	9.7929	10.751	10.8114	10.8852	10.9071	10.7521	10.68	10.7123	10.8188	10.5989	10.77	11.0358	10.5817	10.7952	10.7283	10.6861	10.4088	10.6851	10.5714	10.5115	10.5613	10.5731	10.7089	10.5201	10.6179	10.5224	10.6189	10.5259	10.614	10.4245
	1121	207596	ENSMUSG00000032289	Thsd4	7.3568	7.5173	7.6535	7.5959	7.3262	8.0866	7.6394	7.2731	7.597	7.5412	7.4112	7.5228	7.7831	8.1275	7.8004	7.5211	7.68	7.9353	7.5159	8.0927	7.5737	8.4002	7.641	7.8968	8.0203	7.4411	7.6564	7.5153	7.6821	6.9645	7.1891	9.8066	9.9079	10.105	10.4032	10.2065	10.3361	9.9947	10.2415	10.1218	9.7213	10.1748	9.7944	10.1986	10.1864
	1122	227545	ENSMUSG00000045319	Proser2	6.0504	6.284	5.8459	6.6495	6.0407	5.1982	6.4674	5.7231	6.1122	5.8904	6.227	5.9122	6.4275	6.4551	5.8122	6.4293	5.1481	5.6596	5.0983	5.6484	5.1151	5.6919	4.2427	5.2868	5.8148	6.0499	3.8409	5.7801	5.8488	5.4114	4.893	5.6502	4.9402	4.7042	5.0331	5.1055	5.0173	4.635	5.1099	5.0787	5.3277	5.9615	4.9843	5.0565	5.4941
	1123	72225			8.1253	8.6537	8.8577	8.5514	8.6125	8.7526	8.6054	8.7252	8.601	8.7104	8.607	8.6865	8.6627	8.6158	8.5287	8.6869	8.1861	7.9258	8.5735	8.289	8.2965	8.4162	8.7162	8.3532	7.5581	8.1408	7.9598	8.3034	8.1358	8.3535	7.9765	8.0991	8.1696	8.0377	8.0834	8.0354	8.0236	8.0476	8.1066	8.3047	8.3691	7.9848	8.281	8.1826	8.08
	1124	12921	ENSMUSG00000018634	Crhr1	8.0096	7.3978	7.5219	8.3159	7.7293	7.5703	7.5405	7.6448	7.918	7.7168	7.7596	7.5478	7.5622	7.8315	7.644	7.2966	7.927	8.5684	8.2953	8.3676	8.1615	8.2888	8.6319	7.8079	8.7419	8.343	8.1442	8.3807	8.5444	8.3162	8.6912	8.3788	7.4853	7.4052	7.5673	7.5882	7.5471	7.6585	7.6041	7.5641	7.6815	7.5036	7.273	7.4462	7.7554
	1125	55991	ENSMUSG00000031934	Panx1	8.4762	8.4423	8.5061	8.2386	8.5795	8.4744	8.6908	7.8847	8.3283	8.3392	8.5319	8.6523	8.5009	8.6667	8.4781	8.5911	8.0586	8.7515	8.1745	8.3606	8.2428	7.7887	8.6852	8.0477	8.5315	8.2522	8.3009	8.0564	7.9827	8.2828	7.8472	7.9619	8.2209	8.1592	8.298	8.2327	8.0401	8.1464	8.2681	8.0951	8.1662	8.1612	7.9212	7.9221	8.1575
	1126	100628626			10.0292	12.3252	9.7654	9.2941	9.8555	10.4912	11.0898	9.467	10.3968	9.9165	9.3755	12.5274	12.1695	9.7921	9.9163	10.416	9.6949	9.6897	9.9101	9.6028	9.7651	9.7607	9.4752	9.1987	10.1491	11.0618	9.3806	10.584	9.9654	10.4103	10.6689	9.988	9.3997	9.3707	10.1952	9.2435	9.4315	10.7722	9.1875	10.0947	9.9264	9.7154	10.1641	8.9638	8.714
	1127	71213	ENSMUSG00000044566	Cage1	7.2221	6.696	6.8271	6.6335	5.9552	6.3522	6.4457	7.2414	6.5372	6.5556	6.6673	6.6947	6.9825	6.2735	6.7081	6.7044	5.8068	5.9112	5.8632	6.0804	6.1117	5.8572	4.8769	4.1886	5.1086	5.7033	6.1376	5.08	5.9229	5.8628	6.6238	5.4299	6.1381	5.732	6.2378	5.7738	5.3699	6.0786	5.2759	5.5863	5.7063	5.6333	6.0851	5.7654	5.7756
	1128	226999	ENSMUSG00000026062	Slc9a2	6.8894	6.991	6.8586	7.3139	6.8927	7.0308	7.045	6.9875	6.5633	6.6905	6.6673	7.1014	6.9973	7.3967	6.7934	6.4524	7.7999	7.4964	7.302	8.1665	7.2129	8.0501	6.9651	7.7356	7.4181	7.4721	7.2717	7.2818	7.579	7.5421	6.8593	8.8286	9.123	9.1743	9.6132	9.134	9.3546	9.1835	9.1263	8.9625	9.4123	9.1745	8.9571	9.4892	9.2832
	1129	99326	ENSMUSG00000038860	Garnl3	9.4235	9.441	9.3727	9.1885	9.4755	9.4453	9.2305	8.8853	9.2884	9.2899	9.4872	9.5739	9.173	9.2945	9.4199	9.6326	10.0884	9.9223	10.035	9.6776	10.0312	10.2981	9.8397	9.8479	9.7498	9.8379	10.0567	9.7084	10.0832	9.8906	9.9382	9.6778	9.0054	8.993	9.1036	9.0993	9.0435	9.4236	8.8713	9.0355	9.2618	8.924	8.7101	9.1238	8.6724
	1130	19206	ENSMUSG00000021466	Ptch1	11.1959	11.2776	11.3501	11.4412	11.3455	11.3275	11.3585	11.4618	11.277	11.2401	11.3002	11.2989	11.305	11.3155	11.0744	11.2016	10.3957	9.8639	10.1706	9.9502	10.0882	10.1498	10.4327	9.228	10.0137	10.1792	9.6401	10.1066	9.9345	9.6721	9.8827	9.808	9.4272	9.4922	9.5886	9.0923	9.5046	9.3309	9.3336	9.5585	9.2216	9.2038	9.4997	9.6487	9.4876
	1131	100861876			6.6673	7.3978	6.6936	7.2098	7.106	7.097	7.3318	7.2333	6.7451	7.3285	6.7936	6.9409	6.9062	7.2638	6.5987	6.4752	8.0287	8.3229	8.5591	8.9902	7.789	8.2655	8.4893	7.936	8.5595	8.3176	8.9	8.6319	8.1968	8.3535	7.8342	8.0516	7.9517	7.7458	8.0372	7.9508	8.1504	7.6132	7.986	7.9287	8.0397	7.8903	7.647	7.8	7.9981
	1132	269615	ENSMUSG00000029055	Plch2	9.6544	9.6056	9.0746	9.0202	9.7643	9.7596	9.0482	8.7704	9.2548	9.3397	9.0639	9.217	9.2367	9.2049	9.4751	8.8306	11.6142	11.5388	11.1955	11.3705	11.1918	10.8959	11.3479	11.2274	11.5113	10.8332	11.3351	11.4332	11.182	11.4021	11.1411	11.6776	11.5659	11.5638	11.7384	11.4176	11.8485	11.3771	11.5721	11.6658	11.5966	11.4744	11.6586	11.6523	11.768
	1133	18295	ENSMUSG00000021390	Ogn	4.9136	4.7225	5.7595	5.8375	4.519	6.3878	5.8611	3.0372	5.1074	4.8491	5.3231	4.4376	5.1926	7.9487	5.5237	4.9291	7.5279	8.4208	7.3585	9.0607	7.8621	9.126	8.2626	8.5174	7.8672	7.6108	6.1071	7.885	8.5561	6.342	7.7122	6.8468	6.6587	7.4555	6.8755	7.4453	7.1593	7.5342	7.0607	6.8012	6.3207	6.9641	7.2907	7.0355	6.6909
	1134	83669	ENSMUSG00000066357	Wdr6	13.8185	13.8921	13.6887	13.4474	13.9322	13.6543	13.8073	13.4889	13.4601	13.7235	13.4953	13.4768	13.4591	13.5176	13.3439	13.4313	12.2832	12.0801	12.594	12.5341	12.3377	12.3912	12.2426	12.0754	12.4532	12.6014	12.6284	12.4544	12.2748	12.5179	12.4738	10.9705	10.9691	11.1401	11.3806	11.1356	11.5498	11.0855	11.1083	11.3543	11.2491	11.1834	10.9511	11.553	11.0393
	1135	19259	ENSMUSG00000030854	Ptpn5	11.6313	11.3648	11.6184	11.1672	11.5782	11.2314	11.2399	11.2626	11.3373	11.386	11.369	11.3379	11.3012	11.2326	11.3368	11.1827	11.8533	11.7745	11.7606	11.908	11.751	11.7489	11.6925	11.5144	12.0192	11.9451	11.891	11.7251	11.8373	11.8499	11.8276	10.9415	10.8123	10.8262	10.8766	10.9727	11.1059	10.9568	10.9298	10.9029	11.0086	10.9283	10.9862	10.9708	10.9776
	1136	53870	ENSMUSG00000030092	Cntn6	8.8233	8.9402	8.7328	9.3442	8.7875	8.9203	8.8271	8.6118	8.9462	8.9086	9.1343	9.3076	9.1827	9.1719	9.194	9.2818	7.5491	8.3657	8.3464	7.7948	7.9908	7.687	8.8342	8.4285	8.5428	8.0411	8.5197	8.135	8.4474	8.3488	8.3208	7.6786	6.9598	7.2804	7.012	6.8985	6.6384	6.8258	6.9667	6.1307	6.9322	6.323	6.1052	6.8559	6.3777
	1137	381418	ENSMUSG00000074872	Ctxn2	8.7166	8.5753	8.8499	8.394	8.589	8.4577	8.4883	8.6118	8.4096	8.5801	8.594	8.6808	8.658	8.5602	8.7874	8.6869	7.2191	7.5468	7.6213	7.9971	8.187	7.837	7.7043	8.2218	7.6019	7.4014	7.8897	7.9224	7.4597	7.6282	7.808	6.9333	6.7834	6.9231	7.1991	7.3447	7.2682	7.2774	6.8791	7.1559	7.1921	7.1386	7.0524	7.072	6.9568
	1138	16323	ENSMUSG00000041324	Inhba	5.8913	5.5753	6.0779	4.9864	6.2223	6.2	5.4894	6.6554	5.983	5.9412	5.2368	5.2978	6.1907	5.6635	5.3545	5.2261	8.3279	7.991	6.8915	7.7421	7.5345	6.9155	7.7248	7.5202	7.3034	7.1659	7.3124	7.7665	6.54	6.7989	6.8971	6.813	6.6494	7.3352	7.5849	7.2159	7.2112	7.2281	7.2118	7.0889	6.7503	6.8096	6.8879	6.6914	7.3624
	1139	68957	ENSMUSG00000041423	Paqr6	8.9318	9.0841	8.8707	8.4636	9.4048	8.389	9.0767	9.1939	8.814	8.737	8.7618	8.526	8.4747	8.6076	8.6014	8.3538	7.1788	6.8424	7.2905	7.1383	6.8945	7.5584	7.0159	6.6801	7.5015	7.7374	6.8599	6.9166	6.8869	6.7716	7.2489	7.2436	6.8171	6.3965	6.6817	6.465	6.7224	7.1456	6.5304	6.7843	6.65	6.9245	6.7413	6.4113	6.5136
	1140	106648	ENSMUSG00000073424	Cyp4f15	7.6662	7.6112	7.6595	6.9759	7.4248	7.8257	7.6394	8.1428	7.5651	8.042	7.6554	7.5723	7.5116	7.4465	7.2324	7.7248	8.9192	8.6742	8.3464	8.4087	8.9537	8.8831	8.5934	9.0427	8.2984	8.7525	8.3474	8.4592	8.5561	8.8072	8.8794	7.9095	7.8248	8.0811	7.9171	7.5394	7.8049	8.421	7.5156	7.9363	8.2712	8.1527	8.041	8.084	7.7252
	1141	207607	ENSMUSG00000039963	Ccdc40	7.939	8.2854	8.0853	8.1287	8.2008	8.0086	8.2463	8.0587	7.943	8.0728	7.7362	7.7443	7.7831	7.7495	7.6803	7.9199	5.0323	6.2523	7.1047	6.3851	6.2145	5.8572	6.0272	6.353	6.0543	6.861	5.6787	6.3184	5.8986	5.6988	6.3961	6.0099	5.9981	5.7045	5.8086	6.2288	6.2282	6.2855	6.4972	6.2085	6.6672	6.2123	5.8668	6.4355	6.5136
	1142	626596			6.5538	6.2204	6.773	6.021	6.1473	6.1593	6.9089	5.7459	6.6141	6.6706	6.1815	6.529	6.2902	6.2456	6.5007	6.7424	5.9088	4.5399	4.518	3.9204	5.9422	5.3362	4.454	4.8671	4.0936	6.1491	2.453	4.5779	5.4418	4.3698	6.038	4.8073	4.5164	5.2134	4.5011	4.9646	5.2333	5.6094	4.9223	4.628	5.452	4.5508	5.5519	5.3561	4.9832
	1143	212190	ENSMUSG00000043621	Ubxn10	7.2803	7.847	8.0584	7.3139	7.7207	7.7316	8.1288	7.5954	7.8508	7.7834	7.4014	7.8485	7.7831	7.5528	7.6713	7.7152	6.5588	4.8915	5.342	5.029	5.4463	5.6564	4.7223	6.2938	5.1681	5.677	5.7197	5.8748	5.2633	6.1004	6.2082	5.5442	5.9071	5.6479	5.2838	5.9081	6.1992	5.9138	5.4597	5.5063	5.8029	5.3934	5.9801	5.7267	5.8334
	1144	226777	ENSMUSG00000039349	C130074G19Rik	8.5431	7.9289	7.7797	7.5455	7.7379	7.7455	7.2837	7.7101	7.3795	7.4795	7.3814	7.5965	7.2893	7.4587	7.8883	7.8948	9.4059	9.7715	9.0729	9.4859	9.5459	8.9831	9.6436	9.63	9.821	8.9905	9.3934	9.3612	9.7636	9.4792	9.3	8.0612	8.2019	7.3262	8.1676	7.8375	7.7659	8.3855	7.9248	7.574	7.6645	7.7387	7.7206	7.7103	7.9896
[truncated: 11,872 more rows]
[truncated: 32 more columns]

## Sheet: Unprocessed_CountData
GeneID_mm10 from the Hisat2 webpage	Hypo_P_413	Hypo_P_414	Hypo_P_415	Hypo_P_418	Hypo_P_421	Hypo_P_425	Hypo_P_427	Hypo_P_4493	Hypo_V_405	Hypo_V_409	Hypo_V_4486	Hypo_V_4487	Hypo_V_4488	Hypo_V_4489	Hypo_V_4490	Hypo_V_4491	Amy_P_418	Amy_P_415	Amy_P_414	Amy_P_413	Amy_P_4493	Amy_P_421	Amy_P_425	Amy_P_427	Amy_V_405	Amy_V_409	Amy_V_4486	Amy_V_4489	Amy_V_4488	Amy_V_4490	Amy_V_4491	Hippo_P_413	Hippo_P_414	Hippo_P_415	Hippo_P_418	Hippo_P_421	Hippo_P_425	Hippo_P_427	Hippo_P_4493	Hippo_V_405	Hippo_V_409	Hippo_V_4486	Hippo_V_4487	Hippo_V_4488	Hippo_V_4489	Hippo_V_4491	Ctx_P_413	Ctx_P_414	Ctx_P_415
[truncated: 27,179 more rows]
[truncated: 28 more columns]

[truncated: 9 more sheets: Validation_Genes, Hypo_LimmaVoom, Hypo_FDR<05, Cer_LimmaVoom, Cer_FDR<.05, Ctx_LimmaVoom, Hippo_LimmaVoom, Amy_LimmaVoom, Rcode]
